# Supplementary material for: Ion-pairing π-electronic systems: ordered arrangement and noncovalent interactions of negatively charged porphyrins
Source: Royal Society of Chemistry journal article supplement (doi:10.1039/d1sc02260a), 2021-01-01
Supplement: d1sc02260a1.pdf [file d1sc02260a1.pdf]

## Electronic Supplementary Information

### Ion-pairing $\pi$ -electronic systems: ordered arrangement and noncovalent interactions of negatively charged porphyrins

Yoshifumi Sasano, Hiroki Tanaka, Yohei Haketa, Yoichi Kobayashi, Yukihide Ishibashi, Tatsuki Morimoto, Ryuma Sato, Yasuteru Shigeta, Nobuhiro Yasuda, Tsuyoshi Asahi and Hiromitsu Maeda\*

*Department of Applied Chemistry, College of Life Sciences, Ritsumeikan University, Kusatsu 525–8577, Japan, E-mail: maedahir@ph.ritsumei.ac.jp, Department of Materials Science and Biotechnology, Graduate School of Science and Engineering, Ehime University, Matsuyama 790–8577, Japan, Department of Applied Chemistry, School of Engineering, Tokyo University of Technology, Hachioji 192–0982, Japan, RIKEN Center for Biosystems Dynamics Research (BDR), Suita 565–0874, Japan, Center for Computational Sciences, University of Tsukuba, Tsukuba 305–8577, Japan, Department of Physics, Graduate School of Pure and Applied Sciences, University of Tsukuba, Tsukuba 305–8577, Japan and Diffraction and Scattering Division, Japan Synchrotron Radiation Research Institute, Sayo 679–5198, Japan*

#### Table of Contents

|                                                                           |      |
|---------------------------------------------------------------------------|------|
| <b>1. Synthetic procedures and spectroscopic data</b>                     | S2   |
| Fig. S1–7 $^1\text{H}$ and $^{13}\text{C}$ NMR spectra.                   | S5   |
| <b>2. Deprotonation behavior</b>                                          | S12  |
| Fig. S8 UV/vis absorption spectral changes upon deprotonation.            | S12  |
| <b>3. X-ray crystallographic data</b>                                     | S13  |
| Fig. S9–15 Ortep drawings of single-crystal X-ray structures.             | S14  |
| Fig. S16–31 Packing diagrams of single-crystal X-ray structures.          | S17  |
| Fig. S32 Details in the crystal structures of porphyrin anions.           | S26  |
| Fig. S33–40 Hirshfeld analysis of single-crystal X-ray structures.        | S27  |
| <b>4. Theoretical studies</b>                                             | S32  |
| Fig. S41–45 Optimized structures and ESP mappings.                        | S32  |
| Fig. S46–65 Molecular orbitals and theoretical UV/vis absorption spectra. | S38  |
| Fig. S66–68 Theoretical calculation for NICS.                             | S50  |
| Fig. S69 Theoretical calculation for ACID.                                | S51  |
| Fig. S70–77 ESP mappings based on crystal structures.                     | S52  |
| Fig. S78–80 Single-crystal X-ray structures for EDA analyses.             | S55  |
| Fig. S81 Electronically neutral species for EDA analysis.                 | S62  |
| Fig. S82–86 Theoretical calculations for transition dipole moments.       | S63  |
| Cartesian coordination of optimized structures                            | S67  |
| <b>5. Solution-state behaviors of ion pairs</b>                           | S94  |
| Fig. S87–92 $^1\text{H}$ NMR spectra of ion pairs.                        | S94  |
| Fig. S93,94 UV/vis absorption spectra of ion pairs.                       | S99  |
| <b>6. Solid-state properties of ion pairs</b>                             | S100 |
| Fig. S95,96 Solid-state absorption spectra.                               | S101 |
| Fig. S97–102 Transient absorption spectra and decay profiles.             | S103 |
| Fig. S103,104 Cyclic voltammograms.                                       | S106 |
| Fig. S105,106 Spectroelectrochemical analysis.                            | S107 |

## 1. Synthetic procedures and spectroscopic data

**General procedures.** Starting materials were purchased from FUJIFILM Wako Pure Chemical Corp., Nacalai Tesque Inc., Tokyo Chemical Industry Co., Ltd., and Sigma-Aldrich Co. and were used without further purification unless otherwise stated. NMR spectra used in the characterization of products were recorded on a JEOL ECA-600 600 MHz spectrometer. All NMR spectra were referenced to solvent. UV-visible absorption spectra were recorded on a Hitachi U-3500 spectrometer. Matrix-assisted laser desorption/ionization time-of-flight mass spectrometry (MALDI-TOF-MS) were recorded on a Shimadzu Axima-CFRplus. TLC analyses were carried out on aluminum sheets coated with silica gel 60 (Merck 5554). Column chromatography was performed on Wakogel C-300 and Merck silica gel 60 and 60H.

**Pd<sup>II</sup> complex of 20-bromo-5,10,15-tris(pentafluorophenyl)porphyrin, 1pd.** To a benzonitrile solution (1.6 mL) of 20-bromo-5,10,15-tris(pentafluorophenyl)porphyrin **1**<sup>[S1]</sup> (7.13 mg, 8.03  $\mu$ mol) was added PdBr<sub>2</sub> (9.08 mg, 40.2  $\mu$ mol). The reaction mixture was heated to 140 °C and was stirred under air for 2 h. After benzonitrile was evaporated, the residue was chromatographed over flash silica gel column (CH<sub>2</sub>Cl<sub>2</sub>/*n*-hexane = 1:2) and was recrystallized from CH<sub>2</sub>Cl<sub>2</sub>/MeOH to afford **1pd** (7.20 mg, 7.26  $\mu$ mol, 90%) as a red solid. *R*<sub>f</sub> = 0.49 (CH<sub>2</sub>Cl<sub>2</sub>/*n*-hexane = 1:2). <sup>1</sup>H NMR (600 MHz, CDCl<sub>3</sub>, 20 °C):  $\delta$  (ppm) 9.79 (d, *J* = 4.8 Hz, 2H,  $\beta$ -CH), 8.84 (d, *J* = 4.8 Hz, 2H,  $\beta$ -CH), 8.81 (d, *J* = 4.8 Hz, 2H,  $\beta$ -CH), 8.80 (d, *J* = 5.4 Hz, 2H,  $\beta$ -CH). <sup>13</sup>C NMR (151 MHz, CDCl<sub>3</sub>, 20 °C):  $\delta$  (ppm) 146.30 (d, *J*<sub>13C-19F</sub> = 242 Hz), 142.34, 142.20 (d, *J*<sub>13C-19F</sub> = 261 Hz), 142.14, 141.97, 141.43, 137.53 (d, *J*<sub>13C-19F</sub> = 254 Hz), 134.47, 131.34, 131.01, 130.78, 115.14, 107.91, 105.43, 104.55. UV/vis (CH<sub>2</sub>Cl<sub>2</sub>,  $\lambda_{\text{max}}$ [nm] ( $\epsilon$ , 10<sup>5</sup> M<sup>-1</sup>cm<sup>-1</sup>)): 412 (1.4), 524 (0.14), 556 (0.053). MALDI-TOF-MS: *m/z* (% intensity): 989.7 (100). Calcd for C<sub>38</sub>H<sub>8</sub>BrF<sub>15</sub>N<sub>4</sub>OPd ([M]<sup>+</sup>): 989.87.

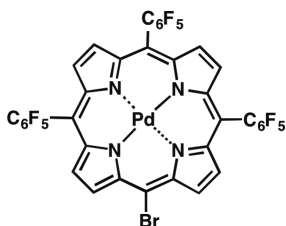

**Pt<sup>II</sup> complex of 20-bromo-5,10,15-tris(pentafluorophenyl)porphyrin, 1pt.** To a chlorobenzene solution (1.0 mL) of **1**<sup>[S1]</sup> (15.0 mg, 16.9  $\mu$ mol) were added PtBr<sub>2</sub>(PhCN)<sub>2</sub> (47.4 mg, 0.0845 mmol) and NaOAc (13.9 mg, 0.169 mmol). The reaction mixture was heated to reflux and was stirred under air for 24 h. After chlorobenzene was evaporated, the residue was chromatographed over flash silica gel column (10% EtOAc/*n*-hexane) and was recrystallized from CH<sub>2</sub>Cl<sub>2</sub>/MeOH to afford **1pt** (17.6 mg, 0.0163 mmol, 96%) as an orange solid. *R*<sub>f</sub> = 0.44 (10% EtOAc/*n*-hexane). <sup>1</sup>H NMR (600 MHz,

CDCl<sub>3</sub>, 20 °C):  $\delta$  (ppm) 9.73 (d, *J* = 5.4 Hz, 2H,  $\beta$ -CH), 8.79 (d, *J* = 5.4 Hz, 2H,  $\beta$ -CH), 8.75 (s, 4H,  $\beta$ -CH). <sup>13</sup>C NMR (151 MHz, CDCl<sub>3</sub>, 20 °C):  $\delta$  (ppm) 146.23 (d, *J*<sub>13C-19F</sub> = 249 Hz), 142.26 (d, *J*<sub>13C-19F</sub> = 258 Hz), 141.90, 141.63, 141.48, 140.86, 137.57 (d, *J*<sub>13C-19F</sub> = 254 Hz), 134.30, 131.14, 130.74, 130.51, 114.71, 108.74, 106.28, 105.34. UV/vis (CH<sub>2</sub>Cl<sub>2</sub>,  $\lambda_{\text{max}}$ [nm] ( $\epsilon$ , 10<sup>5</sup> M<sup>-1</sup>cm<sup>-1</sup>)): 397 (2.1), 511 (0.17), 543 (0.13). MALDI-TOF-MS: *m/z* (% intensity): 1078.8 (100). Calcd for C<sub>38</sub>H<sub>8</sub>BrF<sub>15</sub>N<sub>4</sub>Pt ([M]<sup>+</sup>): 1078.93.

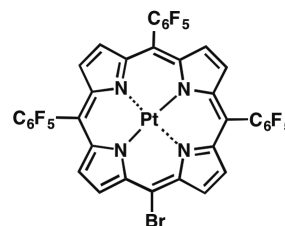

**5-Hydroxy-10,15,20-tris(pentafluorophenyl)porphyrin, 2.** According to the literature procedure for the related reactions,<sup>[S2]</sup> to a THF solution (19 mL) of **1**<sup>[S1]</sup> (90.0 mg, 0.101 mmol) were added Pd(OAc)<sub>2</sub> (2.30 mg, 10.2  $\mu$ mol), racemic 2,2'-bis(diphenylphosphino)-1,1'-binaphthyl (*rac*-BINAP) (5.60 mg, 8.99  $\mu$ mol), and Cs<sub>2</sub>CO<sub>3</sub> (230 mg, 0.707 mmol). The reaction mixture was heated to reflux and was stirred under N<sub>2</sub> for 24 h, and then it was separated with CH<sub>2</sub>Cl<sub>2</sub> and water. The organic phase was washed with brine, was dried over Na<sub>2</sub>SO<sub>4</sub>, and was evaporated to dryness. The residue was chromatographed over flash silica gel column (CH<sub>2</sub>Cl<sub>2</sub>) and was recrystallized from CH<sub>2</sub>Cl<sub>2</sub>/*n*-hexane to afford **2** as a mixture with a hydroxyporphyrin-type tautomer **2-h** and an oxophlorin-type tautomer **2-o** (10,15,20-tris(pentafluorophenyl)oxophlorin) (39.2 mg, 0.0475 mmol, 48%) as a green solid. **2** was also obtained from **2zn** by treatment with TFA in CH<sub>2</sub>Cl<sub>2</sub>. *R*<sub>f</sub> = 0.11 (CH<sub>2</sub>Cl<sub>2</sub>). <sup>1</sup>H NMR (600 MHz, DMSO-*d*<sub>6</sub>, 20 °C; this compound was obtained as a mixture of **2-h** and **2-o** in the ratio of 58:42): **2-h**:  $\delta$  (ppm) 9.58 (br, 2H,  $\beta$ -CH), 8.96 (br, 2H,  $\beta$ -CH), 8.82 (br, 4H,  $\beta$ -CH), -1.15 (br, 2H, NH); **2-o**:  $\delta$  (ppm) 9.58 (br, 2H,  $\beta$ -CH), 8.96 (br, 2H,  $\beta$ -CH), 8.82 (br, 4H,  $\beta$ -CH), 7.95 (br, 1H, NH), 7.69 (br, 1H, NH), 7.30 (br, 1H, NH). <sup>13</sup>C NMR (151 MHz, DMSO-*d*<sub>6</sub>, 20 °C):  $\delta$  (ppm): 145.91 (d, *J*<sub>13C-19F</sub> = 200 Hz), 141.64 (d, *J*<sub>13C-19F</sub> = 253 Hz), 137.42 (d, *J*<sub>13C-19F</sub> = 252 Hz) (the signals of C<sub>6</sub>F<sub>5</sub> units are overlapped and the other signals broadened and were missing probably due to tautomerization). UV/vis (CH<sub>2</sub>Cl<sub>2</sub>,  $\lambda_{\text{max}}$ [nm] ( $\epsilon$ , 10<sup>5</sup> M<sup>-1</sup>cm<sup>-1</sup>)): 414 (1.3), 515 (0.064), 551 (0.050), 594 (0.036), 649 (0.069). MALDI-TOF-MS: *m/z* (% intensity): 823.1 (100). Calcd for C<sub>38</sub>H<sub>10</sub>F<sub>15</sub>N<sub>4</sub>O ([M - H]<sup>-</sup>): 823.06. This compound was further characterized by single-crystal X-ray analysis as a neutral form and also an anionic form as an ion pair with triazatrian-gulenium (TATA) cation.<sup>[S3,4]</sup>

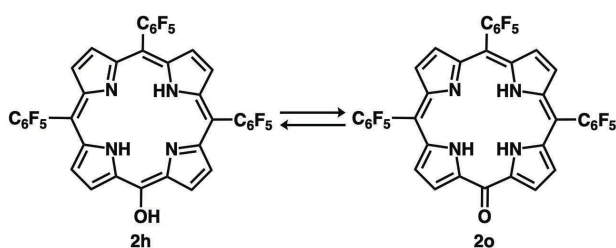

**Ni<sup>II</sup> complex of 5-hydroxy-10,15,20-tris(pentafluorophenyl)porphyrin, 2ni.** **2ni** was obtained from Ni<sup>II</sup> complex of 20-bromo-5,10,15-tris(pentafluorophenyl)porphyrin **1ni** as previously reported.<sup>[S5]</sup> As another procedure, to a toluene solution (1.5 mL) of **2** (5.00 mg, 6.10  $\mu$ mol) was added Ni(acac)<sub>2</sub> (4.7 mg, 18.3  $\mu$ mol). The reaction mixture was heated to reflux and was stirred under air for 13 h. After toluene was evaporated, the residue was chromatographed over flash silica gel column (CH<sub>2</sub>Cl<sub>2</sub>) and was recrystallized from CH<sub>2</sub>Cl<sub>2</sub>/*n*-hexane to afford **2ni** (4.5 mg, 5.1  $\mu$ mol, 81%) as a red solid. Spectroscopic data were reported previously.<sup>[S5]</sup> This compound was further characterized by single-crystal X-ray analysis as an anionic form as an ion pair with TATA cation.<sup>[S3,4]</sup>

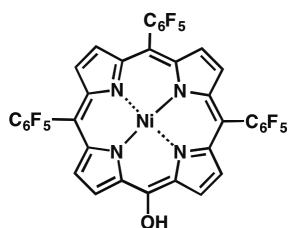

**Zn<sup>II</sup> complex of 5-hydroxy-10,15,20-tris(pentafluorophenyl)porphyrin, 2zn.** To a THF solution (9.7 mL) of Zn<sup>II</sup> complex of 20-bromo-5,10,15-tris(pentafluorophenyl)porphyrin **1zn**<sup>[S6]</sup> (40.0 mg, 42.0  $\mu$ mol) were added Pd(OAc)<sub>2</sub> (1.70 mg, 7.57  $\mu$ mol), *rac*-BINAP (5.56 mg, 8.39  $\mu$ mol), and Cs<sub>2</sub>CO<sub>3</sub> (97.0 mg, 0.298 mmol). The reaction mixture was heated to reflux and was stirred under N<sub>2</sub> for 24 h, and then it was separated with CH<sub>2</sub>Cl<sub>2</sub> and water. The organic phase was washed with brine, was dried over Na<sub>2</sub>SO<sub>4</sub>, and was evaporated to dryness. The residue was chromatographed over flash silica gel column (CH<sub>2</sub>Cl<sub>2</sub>) and was recrystallized from CH<sub>2</sub>Cl<sub>2</sub>/*n*-hexane to afford **2zn** (12.3 mg, 0.0139 mmol, 33%) as a purple solid. *R*<sub>f</sub> = 0.33 (CH<sub>2</sub>Cl<sub>2</sub>). Another procedure: To a CHCl<sub>3</sub>/MeOH solution (0.5/0.1 mL) of **2** (2.96 mg, 3.59  $\mu$ mol) was added Zn(OAc)<sub>2</sub>·2H<sub>2</sub>O (11.1 mg, 60.8  $\mu$ mol). The reaction mixture was heated to reflux and was stirred under air for 24 h. After CHCl<sub>3</sub>/MeOH was evaporated, the residue was chromatographed over flash silica gel column (CH<sub>2</sub>Cl<sub>2</sub>) and was recrystallized from CH<sub>2</sub>Cl<sub>2</sub>/*n*-hexane to afford **2zn** (1.22 mg, 1.37  $\mu$ mol, 38%) as a purple solid. <sup>1</sup>H NMR (600 MHz, DMSO-*d*<sub>6</sub>, 20 °C):  $\delta$  (ppm) 12.41 (br, 1H, OH), 9.68 (br, 2H,  $\beta$ -CH), 8.94 (br, 2H,  $\beta$ -CH), 8.84 (br, 4H,  $\beta$ -CH). <sup>13</sup>C NMR (151 MHz, DMSO-*d*<sub>6</sub>, 20 °C):  $\delta$  (ppm) broad signal was observed probably due to the presence of radical species. UV/vis (CH<sub>2</sub>Cl<sub>2</sub>,  $\lambda_{\max}$ [nm] ( $\epsilon$ , 10<sup>5</sup> M<sup>-1</sup>cm<sup>-1</sup>)): 418 (5.3),

548 (0.17), 597 (0.14). MALDI-TOF-MS: *m/z* (% intensity): 884.9 (100). Calcd for C<sub>38</sub>H<sub>8</sub>F<sub>15</sub>N<sub>4</sub>OZn ([M – H]<sup>-</sup>): 884.98. This compound was further characterized by single-crystal X-ray analysis as an anionic form as an ion pair with tetrabutylammonium (TBA) cation.

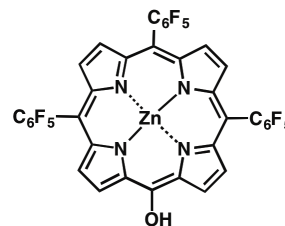

**Pd<sup>II</sup> complex of 5-hydroxy-10,15,20-tris(pentafluorophenyl)porphyrin, 2pd.** To a THF solution (15 mL) of **1pd** (83.2 mg, 83.8  $\mu$ mol) were added Pd(OAc)<sub>2</sub> (1.88 mg, 8.38 mmol), *rac*-BINAP (11.1 mg, 16.7  $\mu$ mol), and Cs<sub>2</sub>CO<sub>3</sub> (191 mg, 0.587 mmol). The reaction mixture was heated to reflux and was stirred under N<sub>2</sub> for 24 h, and then it was separated with CH<sub>2</sub>Cl<sub>2</sub> and water. The organic phase was washed with brine, was dried over Na<sub>2</sub>SO<sub>4</sub>, and was evaporated to dryness. The residue was chromatographed over flash silica gel column (1:1 CH<sub>2</sub>Cl<sub>2</sub>/*n*-hexane) and was recrystallized from CH<sub>2</sub>Cl<sub>2</sub>/*n*-hexane to afford **2pd** (58.4 mg, 0.0629 mmol, 75%) as a red solid. Another procedure: To a benzonitrile solution (1 mL) of **2** (3.19 mg, 3.89  $\mu$ mol) was added PdBr<sub>2</sub> (17.0 mg, 47.9  $\mu$ mol). The reaction mixture was heated to 150 °C and was stirred under air for 2 h. After benzonitrile was evaporated, the residue was chromatographed over flash silica gel column (CH<sub>2</sub>Cl<sub>2</sub>) and was recrystallized from EtOAc/*n*-hexane to afford **2pd** (2.26 mg, 2.43  $\mu$ mol, 63%) as a red solid. *R*<sub>f</sub> = 0.29 (CH<sub>2</sub>Cl<sub>2</sub>). <sup>1</sup>H NMR (600 MHz, DMSO-*d*<sub>6</sub>, 20 °C):  $\delta$  (ppm) 9.79 (br, 2H,  $\beta$ -CH), 9.11 (br, 2H,  $\beta$ -CH), 9.04 (br, 2H,  $\beta$ -CH), 9.01 (br, 2H,  $\beta$ -CH). <sup>13</sup>C NMR (151 MHz, DMSO-*d*<sub>6</sub>, 20 °C):  $\delta$  (ppm) 145.96 (d, *J*<sub>13C-19F</sub> = 241 Hz), 143.08, 141.76 (d, *J*<sub>13C-19F</sub> = 244 Hz), 139.91, 139.37, 137.51 (d, *J*<sub>13C-19F</sub> = 246 Hz), 135.54, 132.69, 131.02, 128.38, 128.24, 114.53, 104.67, 99.89 (one signal of the porphyrin ring is missing due to overlapping, and the signals of C<sub>6</sub>F<sub>5</sub> units are also overlapped). UV/vis (CH<sub>2</sub>Cl<sub>2</sub>,  $\lambda_{\max}$ [nm] ( $\epsilon$ , 10<sup>5</sup> M<sup>-1</sup>cm<sup>-1</sup>)): 412 (2.1), 523 (0.13), 555 (0.071). MALDI-TOF-MS: *m/z* (% intensity): 927.0 (100). Calcd for C<sub>38</sub>H<sub>8</sub>F<sub>15</sub>N<sub>4</sub>OPd ([M – H]<sup>-</sup>): 926.95. This compound was further characterized by single-crystal X-ray analysis as a neutral form and also an anionic form as ion pairs with TBA and TATA<sup>[S3,4]</sup> cations.

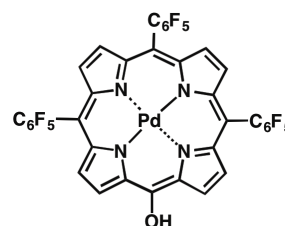

**Pt<sup>II</sup> complex of 5-hydroxy-10,15,20-tris(pentafluorophenyl)porphyrin, 2pt.** To a THF solution (9.2 mL) of

**1pt** (55.5 mg, 51.4  $\mu\text{mol}$ ) were added  $\text{Pd}(\text{OAc})_2$  (1.15 mg, 5.14  $\mu\text{mol}$ ), *rac*-BINAP (6.81 mg, 12.8  $\mu\text{mol}$ ), and  $\text{Cs}_2\text{CO}_3$  (117 mg, 0.360 mmol). The reaction mixture was heated to reflux and was stirred under  $\text{N}_2$  for 24 h, and then it was separated with  $\text{CH}_2\text{Cl}_2$  and water. The organic phase was washed with brine, was dried over  $\text{Na}_2\text{SO}_4$ , and was evaporated to dryness. The residue was chromatographed over flash silica gel column (1:1  $\text{CH}_2\text{Cl}_2/n$ -hexane) and was recrystallized from  $\text{CH}_2\text{Cl}_2/n$ -hexane to afford **2pt** (47.6 mg, 0.0468  $\mu\text{mol}$ , 91%) as an orange solid. Another procedure: To a benzonitrile solution (1 mL) of **2** (5.00 mg, 4.63  $\mu\text{mol}$ ) was added  $\text{PtCl}_2$  (8.10 mg, 23.2  $\mu\text{mol}$ ). The reaction mixture was heated to 150  $^\circ\text{C}$  and was stirred under air for 4 days. After benzonitrile was evaporated, the residue was chromatographed over flash silica gel column ( $\text{CH}_2\text{Cl}_2$ ) and was recrystallized from  $\text{CH}_2\text{Cl}_2/n$ -hexane to afford **2pt** (1.59 mg, 1.57  $\mu\text{mol}$ , 26%) as a red solid.  $R_f$  = 0.31 ( $\text{CH}_2\text{Cl}_2$ ).  $^1\text{H}$  NMR (600 MHz,  $\text{DMSO}-d_6$ , 20  $^\circ\text{C}$ ):  $\delta$  (ppm) 9.73 (d,  $J$  = 4.8 Hz, 2H,  $\beta$ -CH), 9.08 (d,  $J$  = 4.8 Hz, 2H,  $\beta$ -CH), 9.02 (d,  $J$  = 4.8 Hz, 2H,  $\beta$ -CH), 8.99 (d,  $J$  = 4.8 Hz, 2H,  $\beta$ -CH).

$^{13}\text{C}$  NMR (151 MHz,  $\text{DMSO}-d_6$ , 20  $^\circ\text{C}$ ):  $\delta$  (ppm) 145.91 (d,  $J_{13\text{C}-19\text{F}}$  = 243 Hz), 144.93, 142.43, 141.84 (d,  $J_{13\text{C}-19\text{F}}$  = 249 Hz), 138.93, 138.71, 137.56 (d,  $J_{13\text{C}-19\text{F}}$  = 250 Hz), 135.20, 132.62, 130.59, 128.11, 128.09, 114.14, 105.60, 100.57. UV/vis ( $\text{CH}_2\text{Cl}_2$ ,  $\lambda_{\text{max}}$  [nm] ( $\epsilon$ ,  $10^5 \text{ M}^{-1}\text{cm}^{-1}$ )): 399 (1.8), 510 (0.15), 542 (0.10). MALDI-TOF-MS:  $m/z$  (% intensity): 1017.2 (100). Calcd for  $\text{C}_{38}\text{H}_9\text{F}_{15}\text{N}_4\text{OPt}$  ( $[\text{M}]^-$ ): 1017.02. This compound was further characterized by single-crystal X-ray analysis as an anionic form as an ion pair with TBA cation.

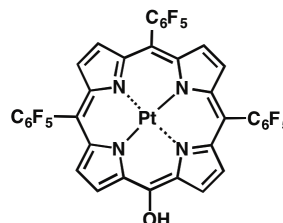



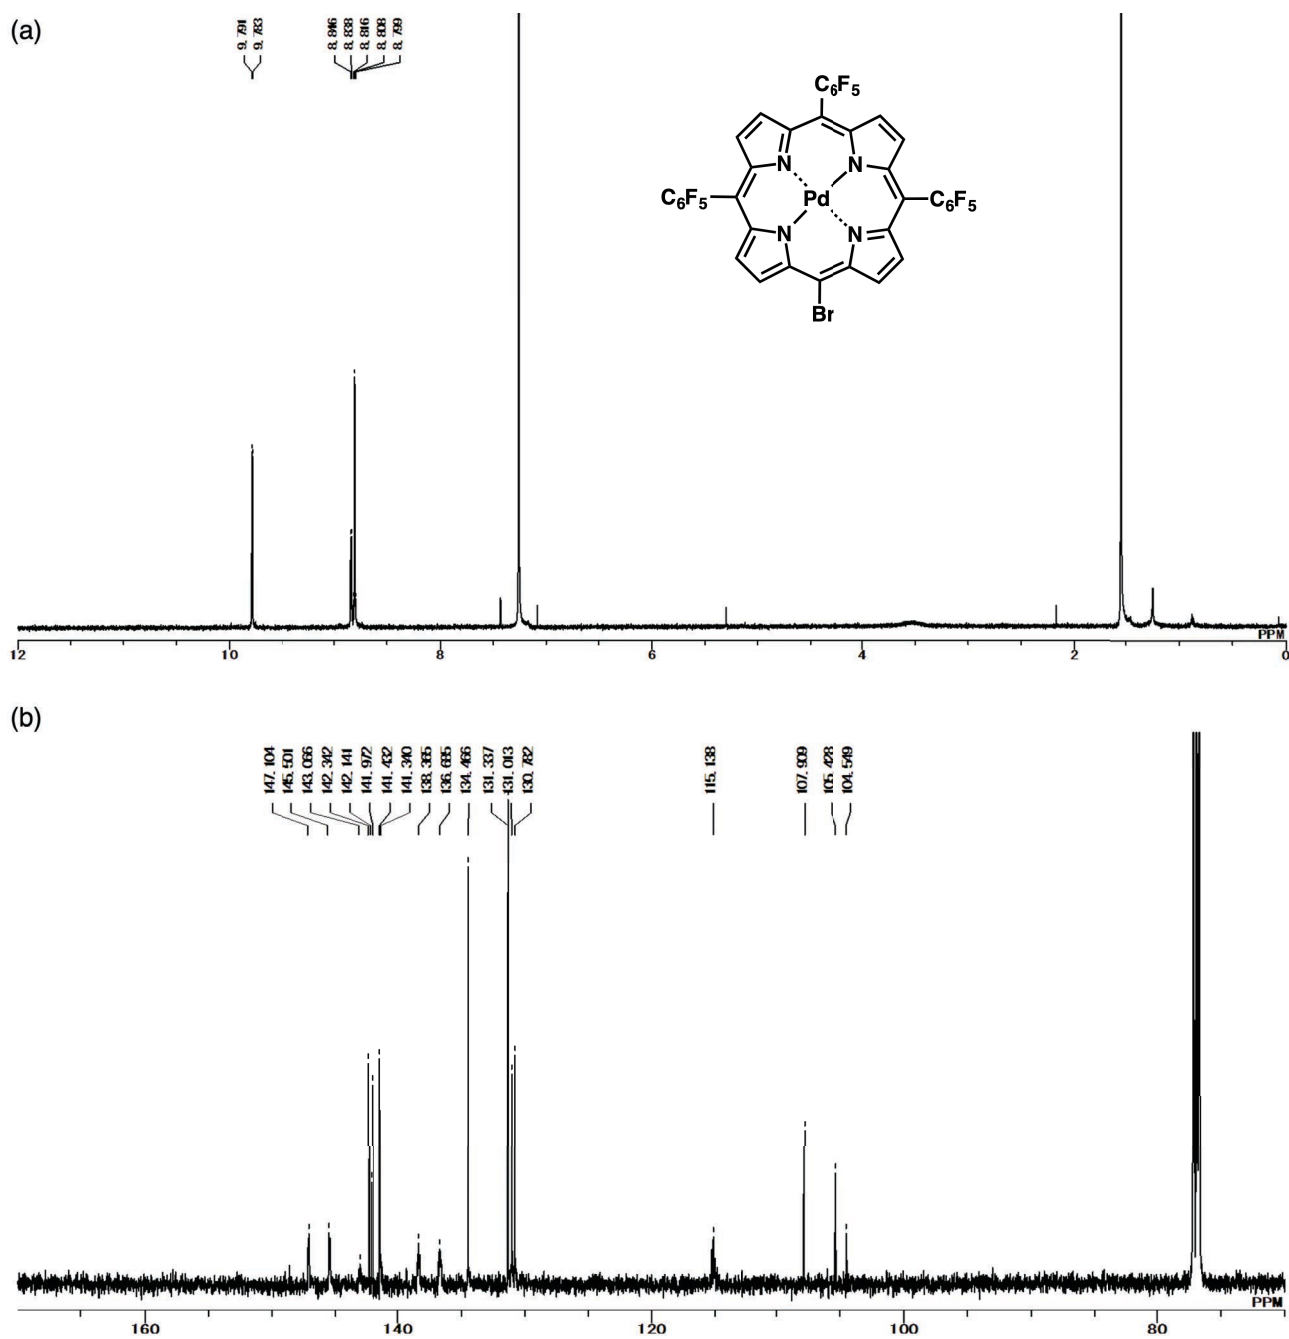

**Fig. S1** (a)  $^1\text{H}$  NMR and (b)  $^{13}\text{C}$  NMR spectra of **1pd** in  $\text{CDCl}_3$  at 20  $^\circ\text{C}$ .

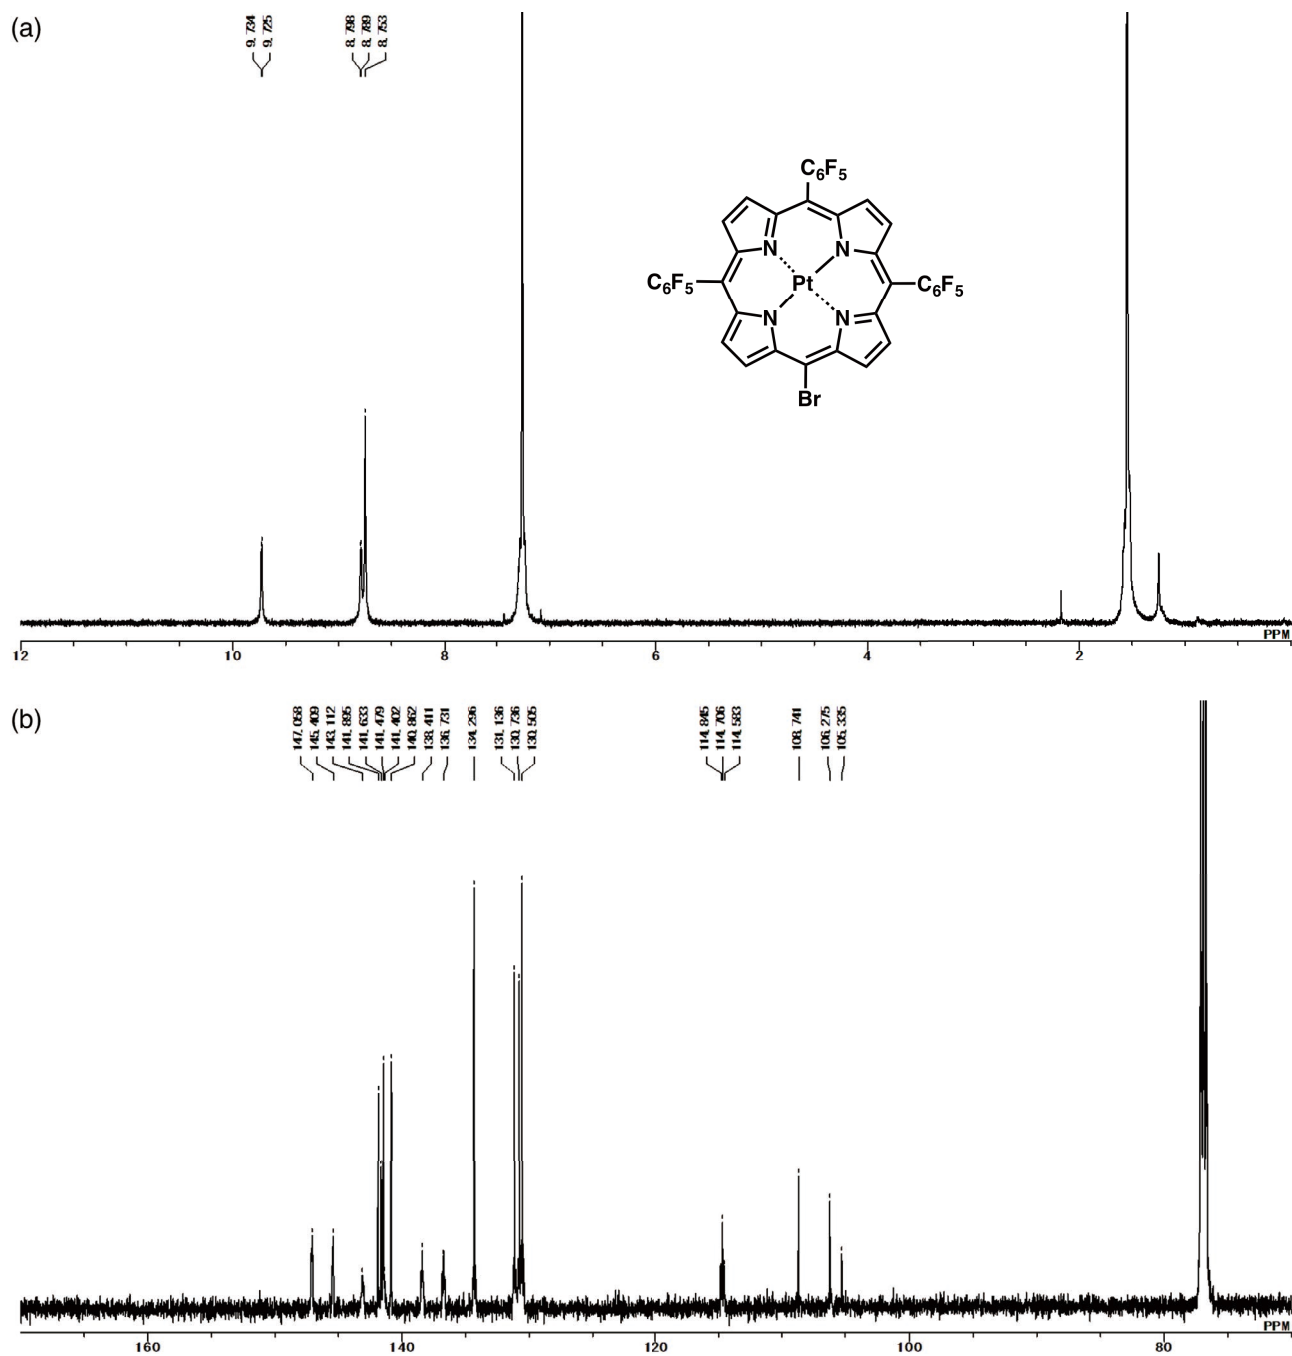

**Fig. S2** (a)  $^1\text{H}$  NMR and (b)  $^{13}\text{C}$  NMR spectra of **1pt** in  $\text{CDCl}_3$  at 20 °C.

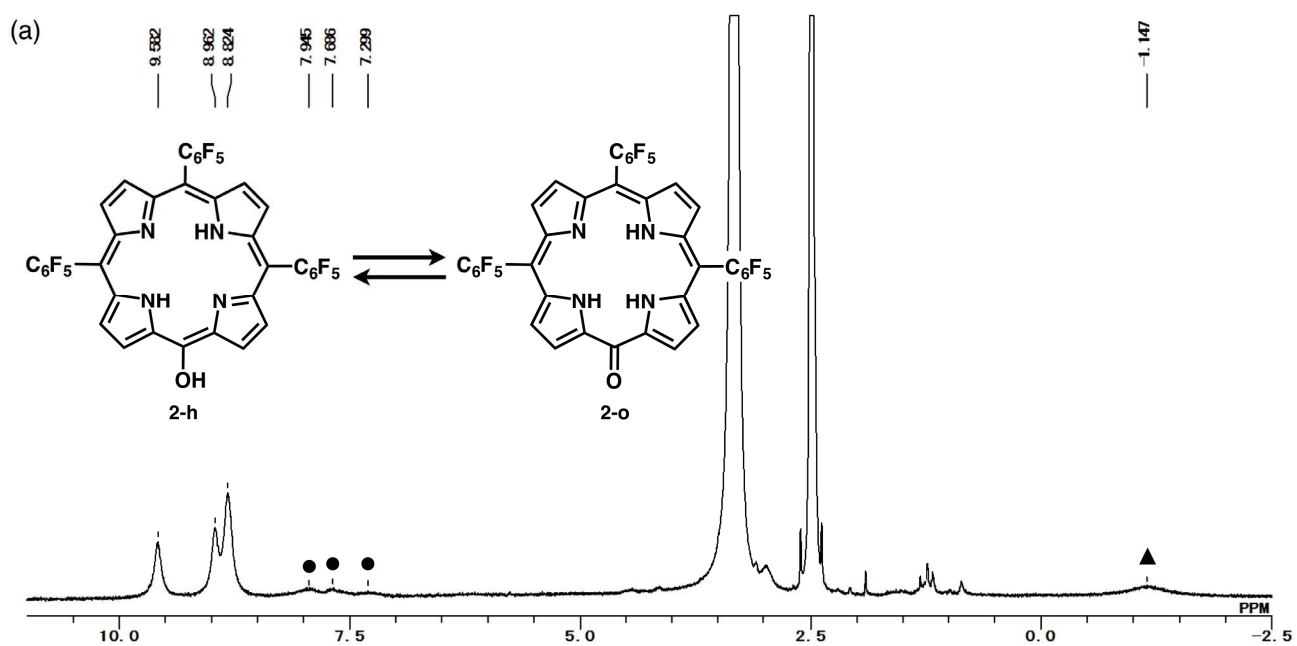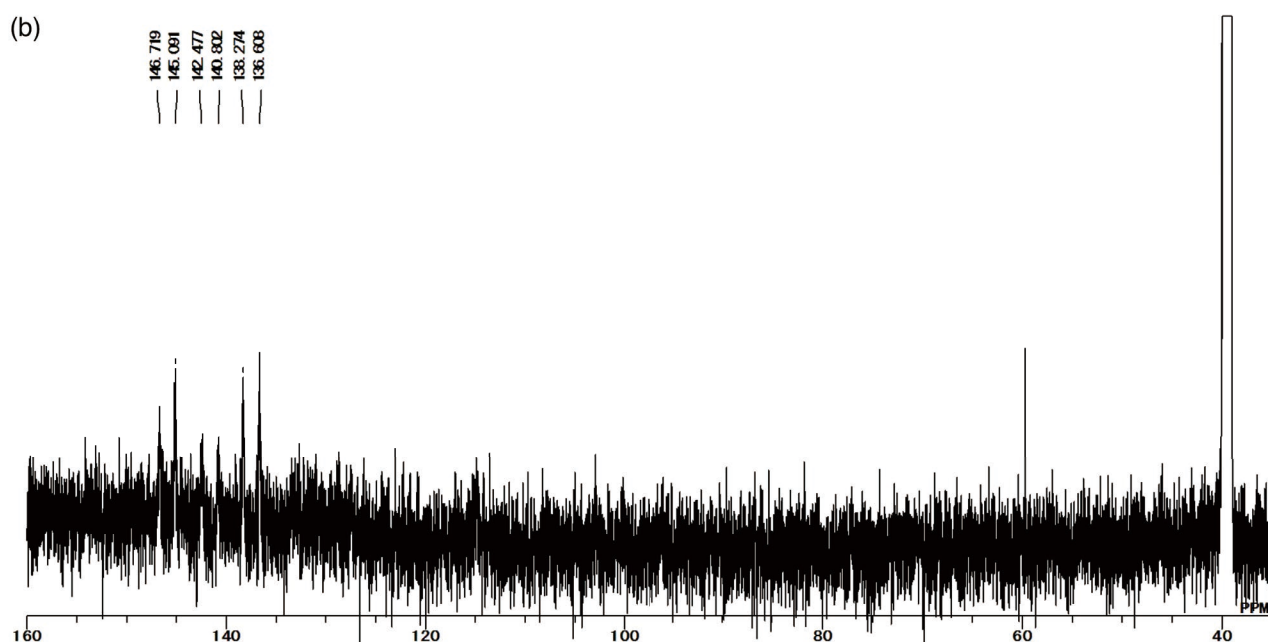

**Fig. S3** (a)  $^1\text{H}$  NMR and (b)  $^{13}\text{C}$  NMR spectra of **2** in  $\text{DMSO-}d_6$  at 20 °C. Signals labeled with triangle and circles are ascribable to hydroxyporphyrin-type tautomer **2-h** and oxophlorin-type tautomer **2-o**, respectively, in an equilibrium.

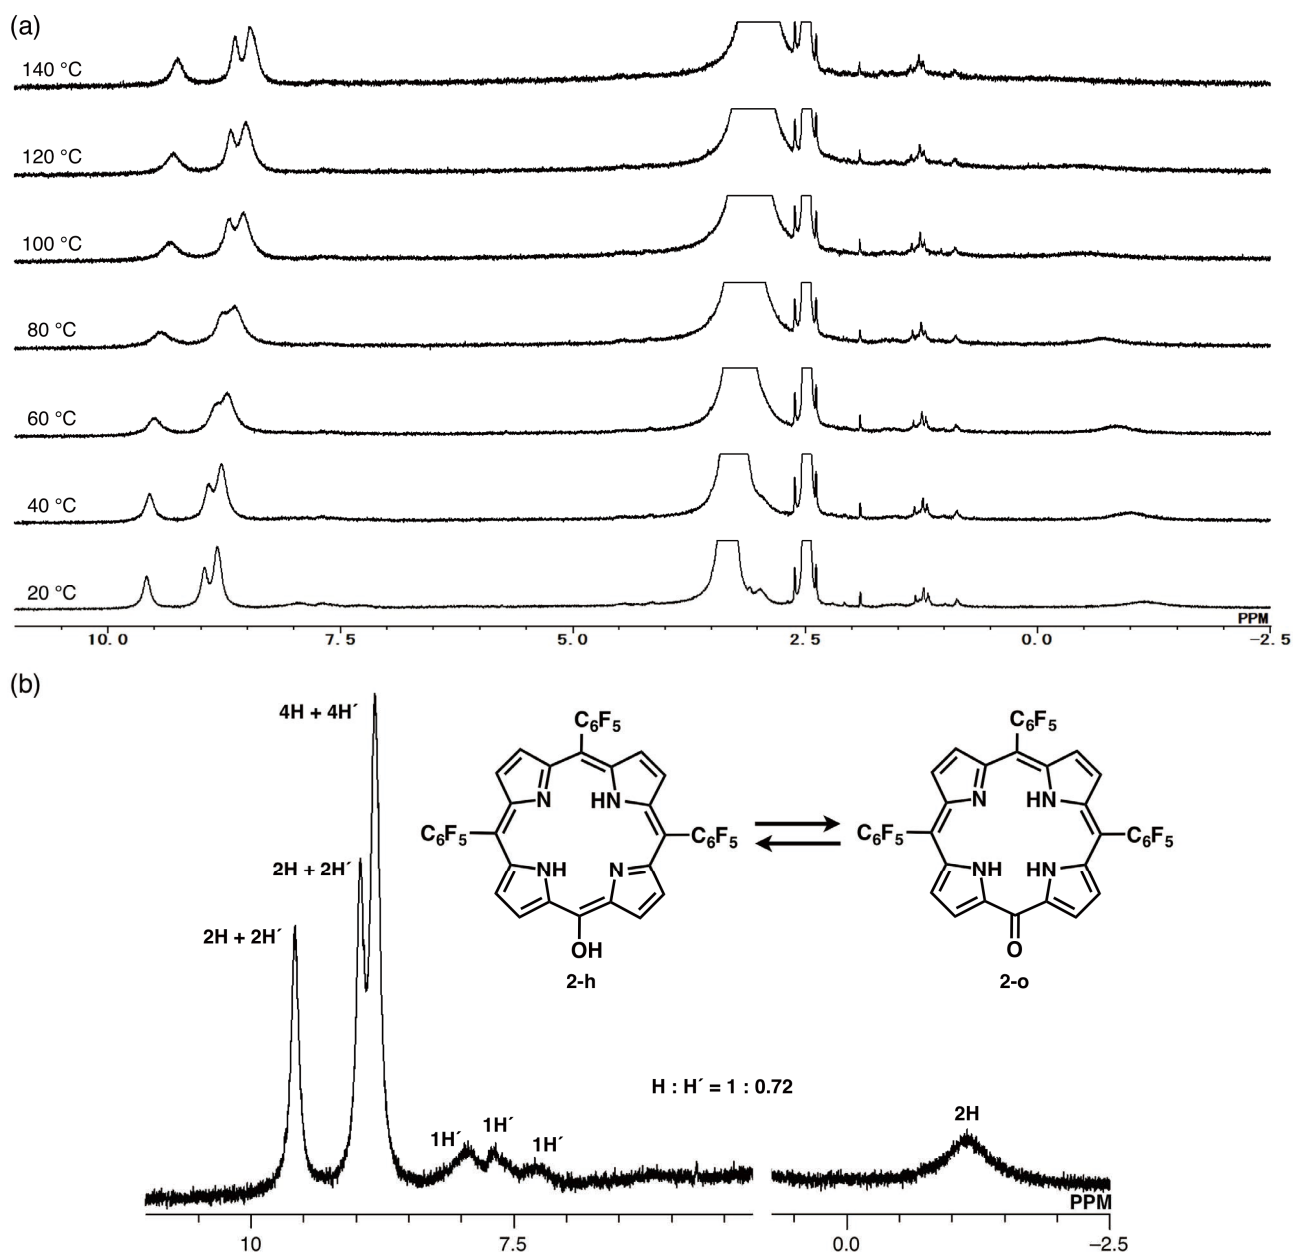

**Fig. S4** (a) VT  $^1\text{H}$  NMR spectral changes of **2** ( $2.0 \times 10^{-3}$  M) in  $\text{DMSO-}d_6$  at 20 to 140 °C and (b) enlarged view at 20 °C. The NH signals at  $-1.15$  and  $7.95\text{--}7.30$  ppm at 20 °C could be assigned for **2-h** and **2-o**, respectively, whereas  $\beta$ -H signals of two tautomers were coalesced. The NH signals were separated with the ratio of 58:42 for **2-h** and **2-o** at 20 °C, and became broader at higher temperature.

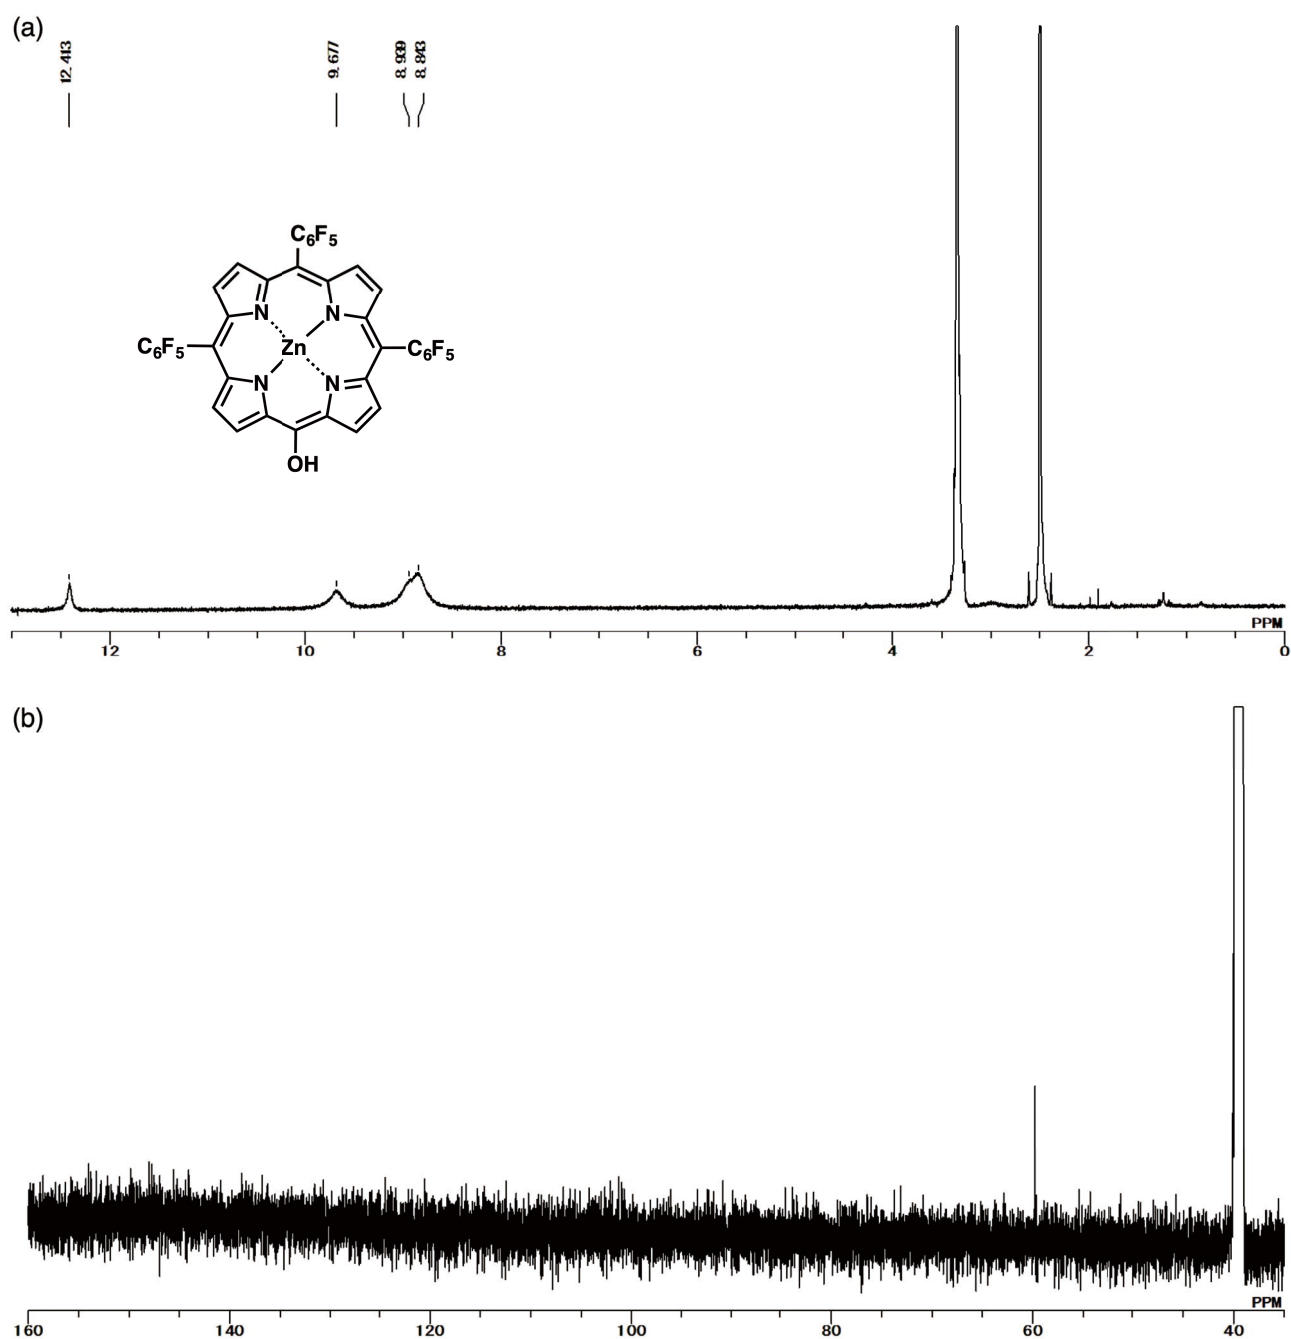

**Fig. S5** (a)  $^1\text{H}$  NMR and (b)  $^{13}\text{C}$  NMR spectra of **2zn** in  $\text{DMSO-}d_6$  at 20 °C. The  $^1\text{H}$  NMR signals were broad in  $\text{DMSO-}d_6$  at 140 °C, probably due to the presence of a small amount of radical species.

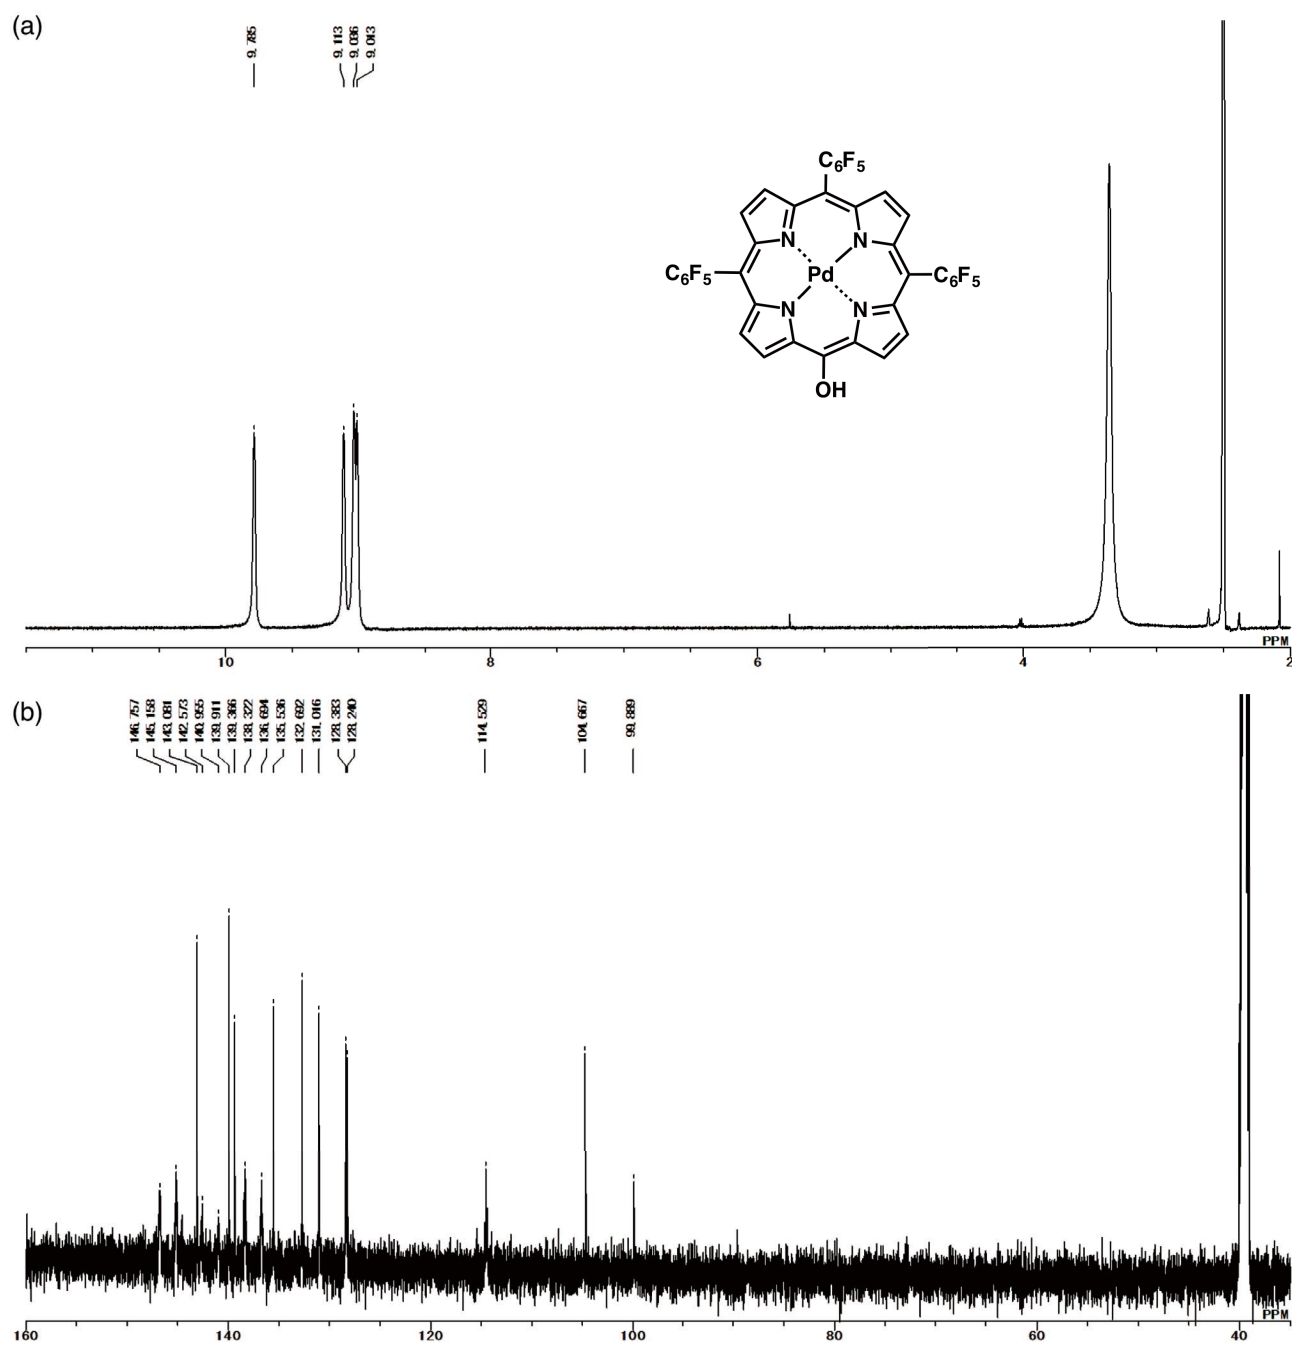

**Fig. S6** (a)  $^1\text{H}$  NMR and (b)  $^{13}\text{C}$  NMR spectra of **2pd** in  $\text{DMSO}-d_6$  at  $20\text{ }^\circ\text{C}$ .



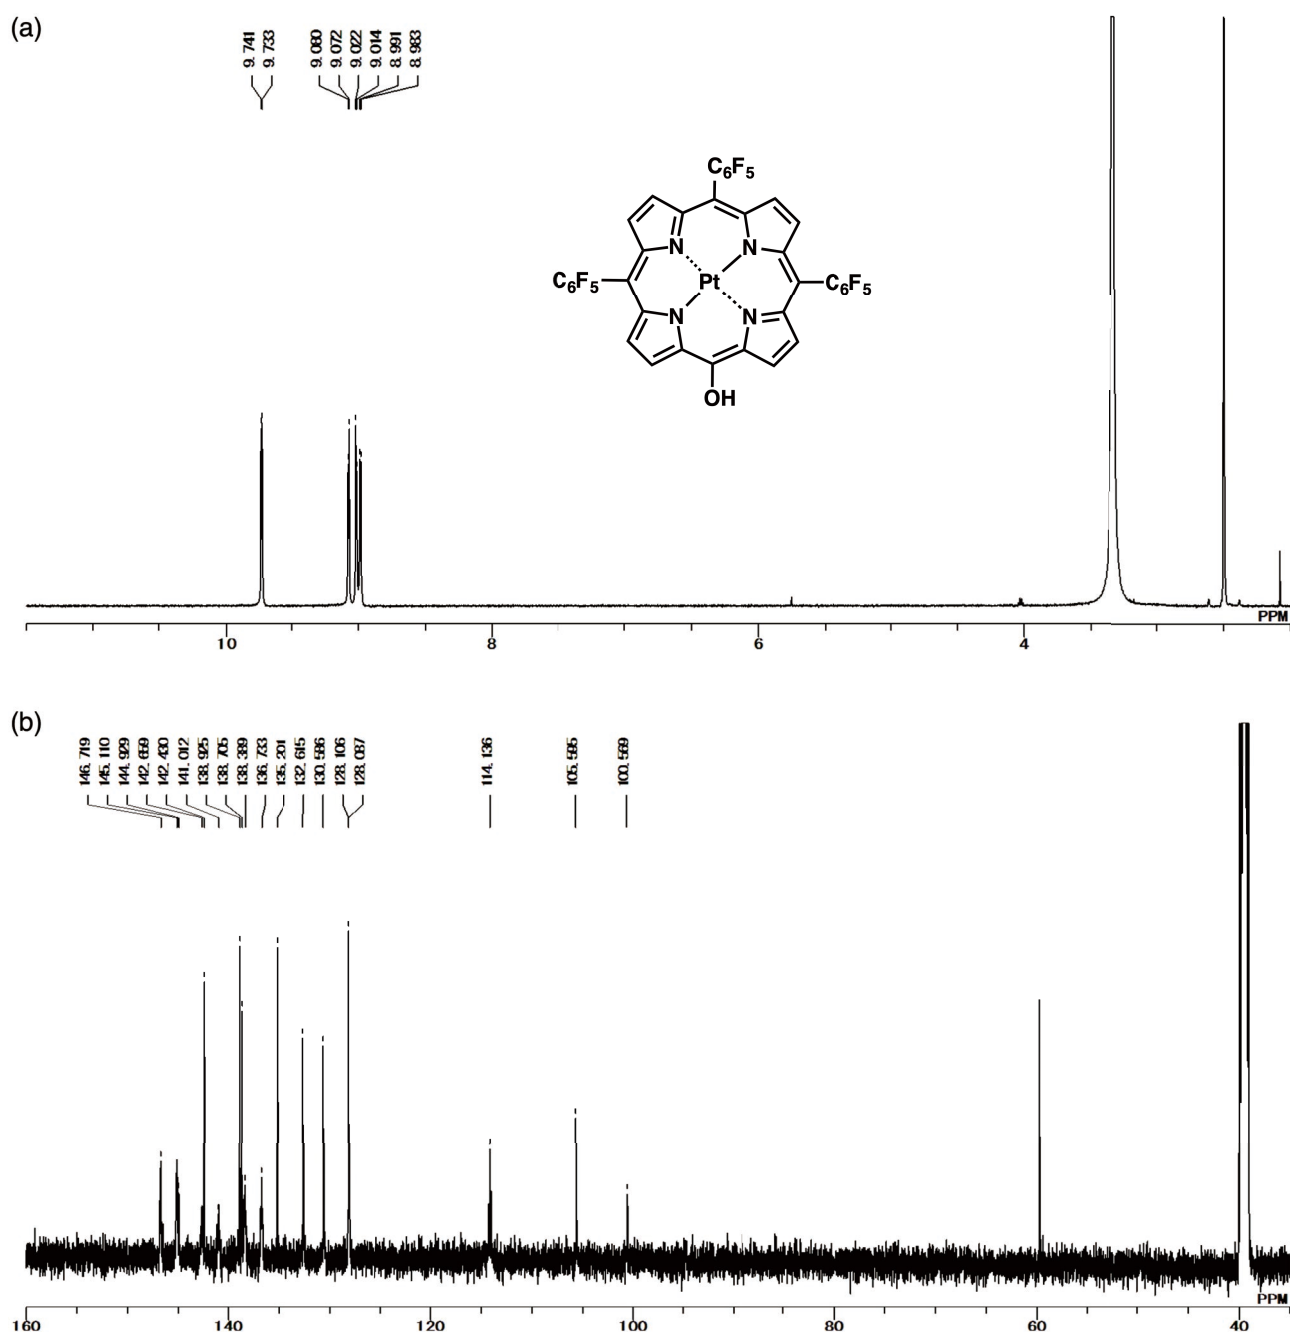

**Fig. S7** (a)  $^1\text{H}$  NMR and (b)  $^{13}\text{C}$  NMR spectra of **2pt** in  $\text{DMSO-}d_6$  at 20 °C.

## 2. Deprotonation behaviors

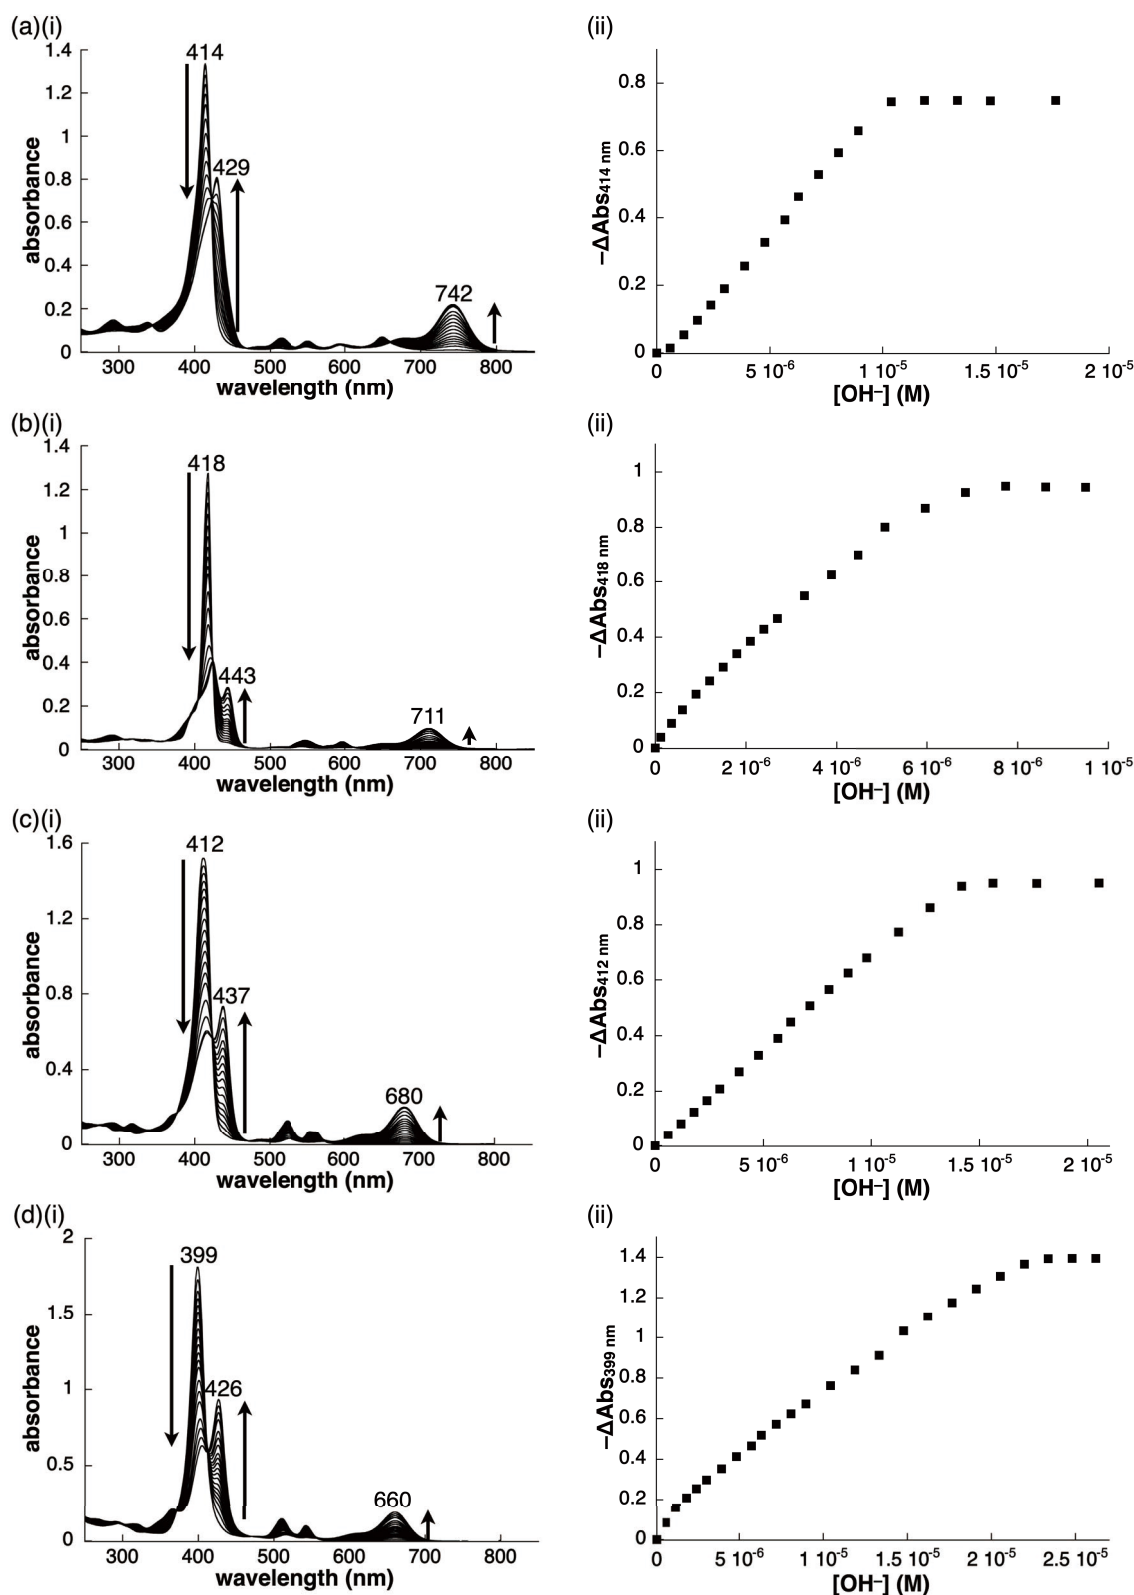

**Fig. S8** Deprotonation behaviors of (a) **2** ( $1.0 \times 10^{-5} \text{ M}$ ), (b) **2zn** ( $2.4 \times 10^{-6} \text{ M}$ ), (c) **2pd** ( $7.1 \times 10^{-6} \text{ M}$ ), and (d) **2pt** ( $1.0 \times 10^{-5} \text{ M}$ ) in  $\text{CH}_2\text{Cl}_2$  upon the addition of TBAOH: (i) UV/vis absorption spectral changes and (ii) corresponding titration plots. **2** showed the maximum spectral changes by adding 1 equiv of the base. On the other hand, **2zn** required an excess amount of the base for the deprotonation to exert UV/vis absorption spectral changes, suggesting the  $\text{OH}^-$  coordination to  $\text{Zn}^{\text{II}}$ . Furthermore, the requirement of an excess amount of  $\text{OH}^-$  for the deprotonation of **2pd** and **2pt** may be derived from the partial  $\text{OH}^-$  coordination to metal as seen in **2ni**.<sup>[S5b]</sup>

### 3. X-ray crystallographic data

**Method for single-crystal X-ray analysis.** Crystallographic data are summarized in Table S1. A single crystal of **2-o** was obtained by vapor diffusion of *n*-hexane into a CHCl<sub>3</sub> solution of **2**. The data crystal was a green prism of approximate dimensions 0.040 mm × 0.040 mm × 0.020 mm. A single crystal of **2zn**<sup>+</sup>-TBA<sup>+</sup> was obtained by vapor diffusion of *n*-hexane into a CH<sub>2</sub>ClCH<sub>2</sub>Cl solution of the 1:1 mixture of **2zn** and TBAOH. The data crystal was a green prism of approximate dimensions 0.040 mm × 0.040 mm × 0.001 mm. A single crystal of **2pd**<sup>+</sup>-TBA<sup>+</sup> was obtained by vapor diffusion of *n*-hexane into a CH<sub>2</sub>Cl<sub>2</sub> solution of the 1:1 mixture of **2pd** and TBAOH. The data crystal was a green prism of approximate dimensions 0.100 mm × 0.015 mm × 0.010 mm. A single crystal of **2pt**<sup>+</sup>-TBA<sup>+</sup> was obtained by vapor diffusion of *n*-hexane into a CH<sub>2</sub>Cl<sub>2</sub> solution of the 1:1 mixture of **2pt** and TBAOH. The data crystal was a green prism of approximate dimensions 0.080 mm × 0.010 mm × 0.010 mm. A single crystal of **2**<sup>+</sup>-TATA<sup>+</sup> was obtained by vapor diffusion of *n*-hexane into a CH<sub>2</sub>Cl<sub>2</sub> solution of the 1:1 mixture of **2**<sup>+</sup> as a Na<sup>+</sup> salt, which was prepared by treating a CH<sub>2</sub>Cl<sub>2</sub> solution of **2** with NaOH aq, and TATA<sup>+</sup>-Cl<sup>−</sup>[S3,4] upon washing with ion-exchanged water several times to remove NaCl. The data crystal was a red prism of approximate dimensions 0.010 mm × 0.010 mm × 0.010 mm. A single crystal of **2ni**<sup>+</sup>-TATA<sup>+</sup> was obtained by vapor diffusion of H<sub>2</sub>O into an CH<sub>3</sub>CN solution of the 1:1 mixture of **2ni**<sup>+</sup> as a Na<sup>+</sup> salt, which was prepared by treating a CH<sub>2</sub>Cl<sub>2</sub> solution of **2ni** with NaOH aq, and TATA<sup>+</sup>-Cl<sup>−</sup>[S3,4] upon washing with ion-exchanged water several times to remove NaCl. The data crystal was a red prism of approximate dimensions 0.060 mm × 0.010 mm × 0.010 mm. A single crystal of **2pd**<sup>+</sup>-TATA<sup>+</sup> was obtained by vapor diffusion of *n*-hexane into an EtOAc solution of the 1:1 mixture of **2pd**<sup>+</sup> as a Na<sup>+</sup> salt, which was prepared by treating a CH<sub>2</sub>Cl<sub>2</sub> solution of **2pd** with NaOH aq, and TATA<sup>+</sup>-Cl<sup>−</sup>[S3,4] upon washing with ion-exchanged water several times to remove NaCl. The data crystal was a yellow prism of approximate dimensions 0.120 mm × 0.005 mm × 0.005 mm. Data were collected at 90 K on a Rigaku Saturn 724 diffractometer with Si (111) monochromated synchrotron radiation ( $\lambda = 0.7829$  Å for **2-o**, **2zn**<sup>+</sup>-TBA<sup>+</sup>, **2pt**<sup>+</sup>-TBA<sup>+</sup>, and **2**<sup>+</sup>-TATA<sup>+</sup> and 0.78192 Å for **2pd**<sup>+</sup>-TBA<sup>+</sup>, **2ni**<sup>+</sup>-TATA<sup>+</sup>, and **2pd**<sup>+</sup>-TATA<sup>+</sup>) at BL40XU (Spring-8).[S7] All the structures were solved by dual-space method. The structures were refined by a full-matrix least-squares method by using a SHELXL 2014[S8] (Yadokari-XG).[S9] In each structure, the non-hydrogen atoms were refined anisotropically. CCDC 1906673–1906679 contain the supplementary crystallographic data for this paper. These data are provided free of charge from the Cambridge Crystallographic Data Centre via [www.ccdc.cam.ac.uk/data\\_request/cif](http://www.ccdc.cam.ac.uk/data_request/cif).

**Table S1** Crystallographic details.

|                                                              | <b>2-o</b>                                                                                                                         | <b>2zn</b> <sup>+</sup> -TBA <sup>+</sup>                                                                                                      | <b>2pd</b> <sup>+</sup> -TBA <sup>+</sup>                                                               | <b>2pt</b> <sup>+</sup> -TBA <sup>+</sup>                                                               | <b>2</b> <sup>+</sup> -TATA <sup>+</sup>                                                                                              | <b>2ni</b> <sup>+</sup> -TATA <sup>+</sup>                                                                                               | <b>2pd</b> <sup>+</sup> -TATA <sup>+</sup>                                                                           |
|--------------------------------------------------------------|------------------------------------------------------------------------------------------------------------------------------------|------------------------------------------------------------------------------------------------------------------------------------------------|---------------------------------------------------------------------------------------------------------|---------------------------------------------------------------------------------------------------------|---------------------------------------------------------------------------------------------------------------------------------------|------------------------------------------------------------------------------------------------------------------------------------------|----------------------------------------------------------------------------------------------------------------------|
| formula                                                      | C <sub>38</sub> H <sub>11</sub> F <sub>15</sub> N <sub>4</sub> O·<br>0.23CHCl <sub>3</sub> ·<br>0.13C <sub>6</sub> H <sub>14</sub> | C <sub>38</sub> H <sub>8</sub> F <sub>15</sub> N <sub>4</sub> OZn·<br>C <sub>16</sub> H <sub>36</sub> N·<br>0.42C <sub>6</sub> H <sub>14</sub> | C <sub>38</sub> H <sub>8</sub> F <sub>15</sub> N <sub>4</sub> OPd·<br>C <sub>16</sub> H <sub>36</sub> N | C <sub>38</sub> H <sub>8</sub> F <sub>15</sub> N <sub>4</sub> OPt·<br>C <sub>16</sub> H <sub>36</sub> N | C <sub>38</sub> H <sub>10</sub> F <sub>15</sub> N <sub>4</sub> O·<br>C <sub>28</sub> H <sub>30</sub> N <sub>3</sub> ·H <sub>2</sub> O | C <sub>38</sub> H <sub>8</sub> F <sub>15</sub> N <sub>4</sub> ONi·<br>C <sub>28</sub> H <sub>30</sub> N <sub>3</sub> ·CH <sub>3</sub> CN | C <sub>38</sub> H <sub>8</sub> F <sub>15</sub> N <sub>4</sub> OPd·<br>C <sub>28</sub> H <sub>30</sub> N <sub>3</sub> |
| fw                                                           | 862.51                                                                                                                             | 1200.33                                                                                                                                        | 1170.34                                                                                                 | 1259.03                                                                                                 | 1250.06                                                                                                                               | 1329.80                                                                                                                                  | 1336.43                                                                                                              |
| crystal size,<br>mm                                          | 0.040 × 0.040 ×<br>0.001                                                                                                           | 0.040 × 0.040 ×<br>0.020                                                                                                                       | 0.100 × 0.015 ×<br>0.010                                                                                | 0.080 × 0.010 ×<br>0.010                                                                                | 0.010 × 0.010 ×<br>0.010                                                                                                              | 0.060 × 0.010 ×<br>0.010                                                                                                                 | 0.120 × 0.005 ×<br>0.005                                                                                             |
| crystal system                                               | triclinic                                                                                                                          | triclinic                                                                                                                                      | orthorhombic                                                                                            | orthorhombic                                                                                            | triclinic                                                                                                                             | monoclinic                                                                                                                               | monoclinic                                                                                                           |
| space group                                                  | <i>P</i> 1̄ (no. 2)                                                                                                                | <i>P</i> 1̄ (no. 2)                                                                                                                            | <i>P</i> 2 <sub>1</sub> 2 <sub>1</sub> 2 <sub>1</sub> (no. 19)                                          | <i>P</i> 2 <sub>1</sub> 2 <sub>1</sub> 2 <sub>1</sub> (no. 19)                                          | <i>P</i> 1̄ (no. 2)                                                                                                                   | <i>P</i> 2 <sub>1</sub> / <i>c</i> (no. 14)                                                                                              | <i>P</i> 2 <sub>1</sub> / <i>c</i> (no. 14)                                                                          |
| <i>a</i> , Å                                                 | 11.734(2)                                                                                                                          | 15.303(3)                                                                                                                                      | 8.2881(3)                                                                                               | 8.1911(16)                                                                                              | 7.389(2)                                                                                                                              | 8.4930(4)                                                                                                                                | 8.8987(2)                                                                                                            |
| <i>b</i> , Å                                                 | 15.683(3)                                                                                                                          | 16.985(3)                                                                                                                                      | 22.4879(6)                                                                                              | 22.065(4)                                                                                               | 13.345(4)                                                                                                                             | 28.6109(13)                                                                                                                              | 18.5720(5)                                                                                                           |
| <i>c</i> , Å                                                 | 18.431(3)                                                                                                                          | 20.280(4)                                                                                                                                      | 26.3395(9)                                                                                              | 25.559(5)                                                                                               | 26.551(8)                                                                                                                             | 22.8426(9)                                                                                                                               | 32.3929(8)                                                                                                           |
| $\alpha$ , °                                                 | 84.631(3)                                                                                                                          | 92.310(2)                                                                                                                                      | 90                                                                                                      | 90                                                                                                      | 103.059(4)                                                                                                                            | 90                                                                                                                                       | 90                                                                                                                   |
| $\beta$ , °                                                  | 80.158(3)                                                                                                                          | 94.162(2)                                                                                                                                      | 90                                                                                                      | 90                                                                                                      | 93.168(4)                                                                                                                             | 96.787(3)                                                                                                                                | 90.213(2)                                                                                                            |
| $\gamma$ , °                                                 | 81.477(3)                                                                                                                          | 101.368(2)                                                                                                                                     | 90                                                                                                      | 90                                                                                                      | 93.947(4)                                                                                                                             | 90                                                                                                                                       | 90                                                                                                                   |
| <i>V</i> , Å <sup>3</sup>                                    | 3297.0(11)                                                                                                                         | 5146.2(17)                                                                                                                                     | 4909.2(3)                                                                                               | 4619.5(16)                                                                                              | 2537.6(14)                                                                                                                            | 5511.7(4)                                                                                                                                | 5353.4(2)                                                                                                            |
| $\rho_{\text{calcd}}$ , gcm <sup>−3</sup>                    | 1.738                                                                                                                              | 1.549                                                                                                                                          | 1.583                                                                                                   | 1.810                                                                                                   | 1.633                                                                                                                                 | 1.603                                                                                                                                    | 1.658                                                                                                                |
| <i>Z</i>                                                     | 4                                                                                                                                  | 4                                                                                                                                              | 4                                                                                                       | 4                                                                                                       | 2                                                                                                                                     | 4                                                                                                                                        | 4                                                                                                                    |
| <i>T</i> , K                                                 | 90(2)                                                                                                                              | 90(2)                                                                                                                                          | 90(2)                                                                                                   | 90(2)                                                                                                   | 90(2)                                                                                                                                 | 90(2)                                                                                                                                    | 90(2)                                                                                                                |
| $\mu$ , mm <sup>−1</sup>                                     | 0.277                                                                                                                              | 0.815                                                                                                                                          | 0.611                                                                                                   | 4.001                                                                                                   | 0.173                                                                                                                                 | 0.589                                                                                                                                    | 0.576                                                                                                                |
| no. of reflns                                                | 27892                                                                                                                              | 44052                                                                                                                                          | 27310                                                                                                   | 25047                                                                                                   | 20578                                                                                                                                 | 29443                                                                                                                                    | 22814                                                                                                                |
| no. of unique reflns                                         | 11841                                                                                                                              | 18560                                                                                                                                          | 8719                                                                                                    | 7915                                                                                                    | 9091                                                                                                                                  | 9787                                                                                                                                     | 9642                                                                                                                 |
| variables                                                    | 1112                                                                                                                               | 1425                                                                                                                                           | 691                                                                                                     | 529                                                                                                     | 814                                                                                                                                   | 840                                                                                                                                      | 814                                                                                                                  |
| $\lambda$ , Å                                                | 0.7829                                                                                                                             | 0.7829                                                                                                                                         | 0.78192                                                                                                 | 0.7829                                                                                                  | 0.7829                                                                                                                                | 0.78192                                                                                                                                  | 0.78192                                                                                                              |
| <i>R</i> <sub>1</sub> ( <i>I</i> > 2 $\sigma$ ( <i>I</i> ))  | 0.0699                                                                                                                             | 0.0853                                                                                                                                         | 0.0641                                                                                                  | 0.0636                                                                                                  | 0.0629                                                                                                                                | 0.0956                                                                                                                                   | 0.0878                                                                                                               |
| <i>wR</i> <sub>2</sub> ( <i>I</i> > 2 $\sigma$ ( <i>I</i> )) | 0.1810                                                                                                                             | 0.2113                                                                                                                                         | 0.1539                                                                                                  | 0.1351                                                                                                  | 0.1427                                                                                                                                | 0.1942                                                                                                                                   | 0.2039                                                                                                               |
| <i>GOF</i>                                                   | 1.136                                                                                                                              | 1.196                                                                                                                                          | 1.101                                                                                                   | 1.127                                                                                                   | 1.055                                                                                                                                 | 1.060                                                                                                                                    | 0.966                                                                                                                |

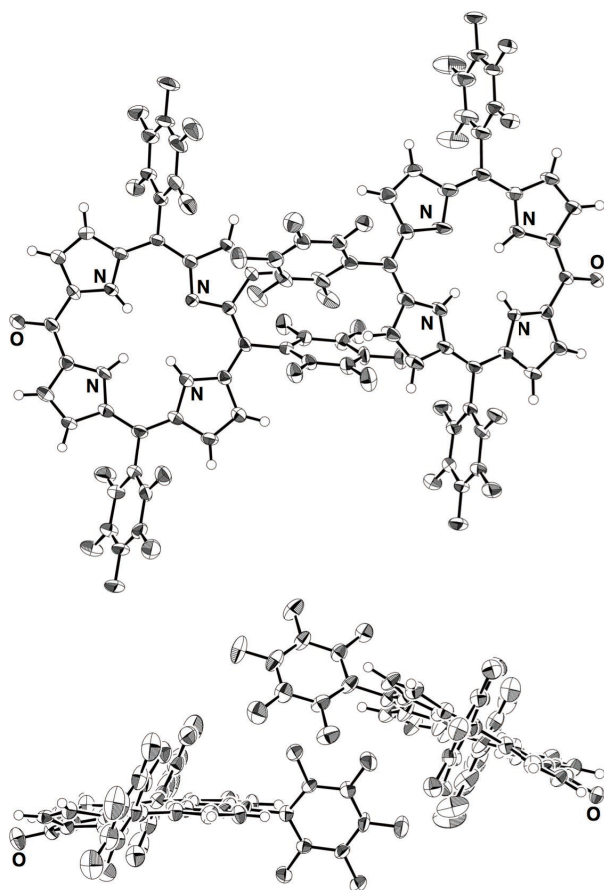

**Fig. S9** Ortep drawings of single-crystal X-ray structure (top and side views) of **2-o**. Thermal ellipsoids are scaled to the 50% probability level.

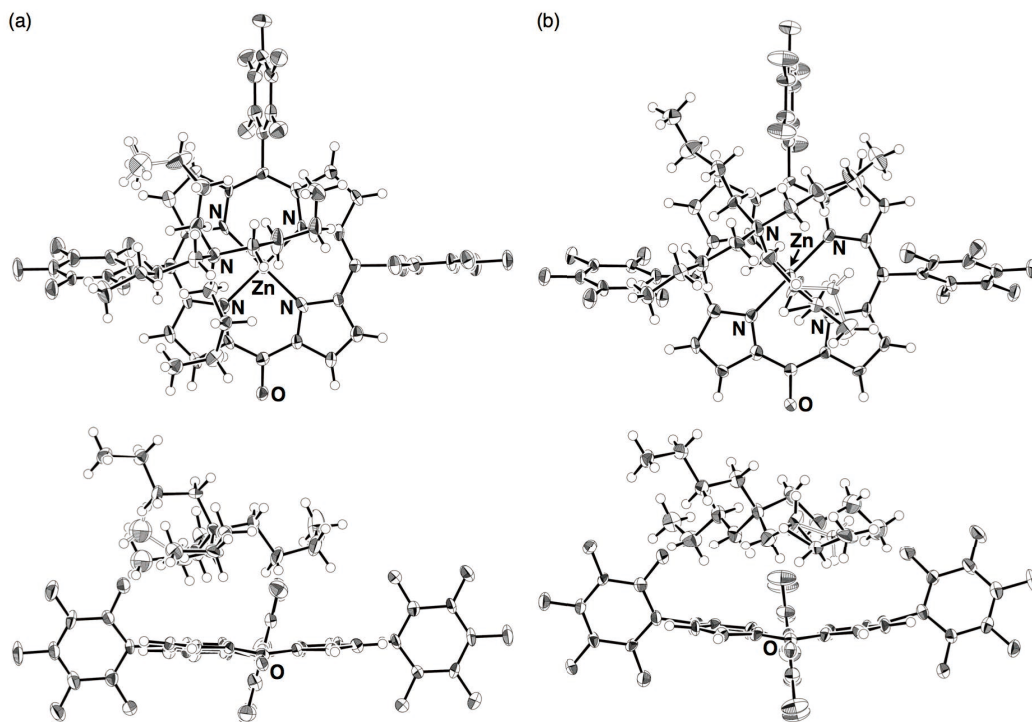

**Fig. S10** Ortep drawings of single-crystal X-ray structure (top and side views) of **2zn<sup>+</sup>-TBA<sup>+</sup>** as two independent structures ((a) and (b)). Thermal ellipsoids are scaled to the 50% probability level. TBA<sup>+</sup> has disordered structures in the ratios of 57 (black bond) : 43 (white bond) and 60 (black bond) : 40 (white bond) for (a) and (b), respectively.

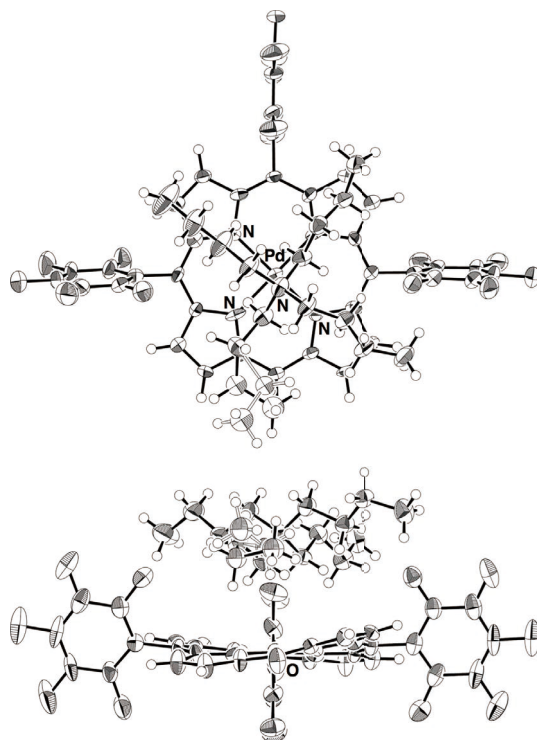

**Fig. S11** Ortep drawings of single-crystal X-ray structure (top and side views) of **2pd**<sup>-</sup>-TBA<sup>+</sup>. Thermal ellipsoids are scaled to the 50% probability level. A butyl group of TBA<sup>+</sup> has disordered structures in the ratio of 61 (black bond) : 39 (white bond). Flack parameter (0.178(16)) suggested the crystal including one enantiomer.

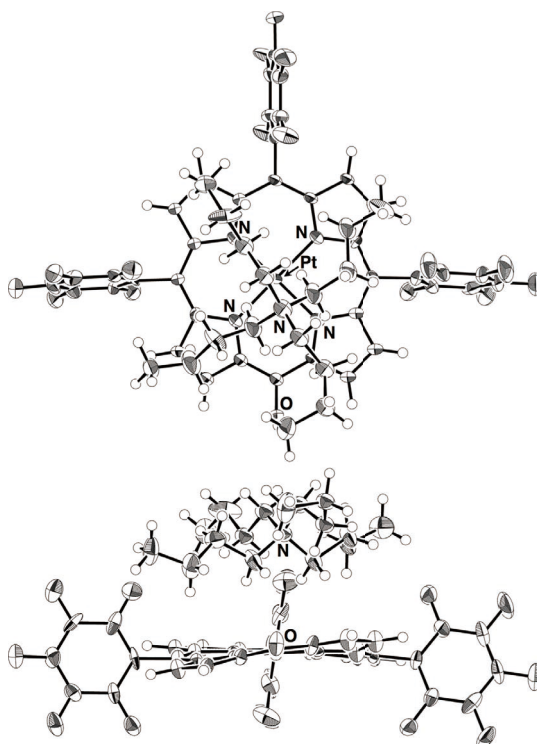

**Fig. S12** Ortep drawings of single-crystal X-ray structure (top and side views) of **2pt**<sup>-</sup>-TBA<sup>+</sup>. Thermal ellipsoids are scaled to the 50% probability level. Flack parameter (0.475(6)) suggested the racemic twin crystals.

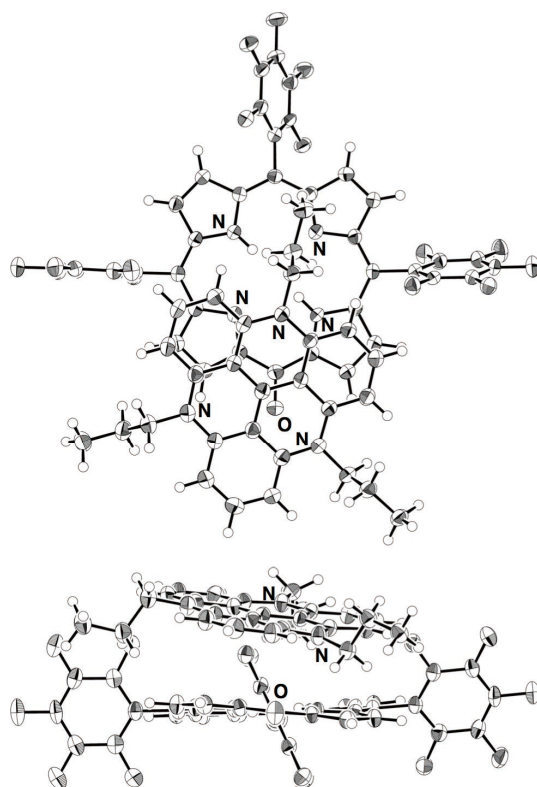

**Fig. S13** Ortep drawings of single-crystal X-ray structure (top and side views) of **2**<sup>-</sup>-TATA<sup>+</sup>. Thermal ellipsoids are scaled to the 50% probability level.

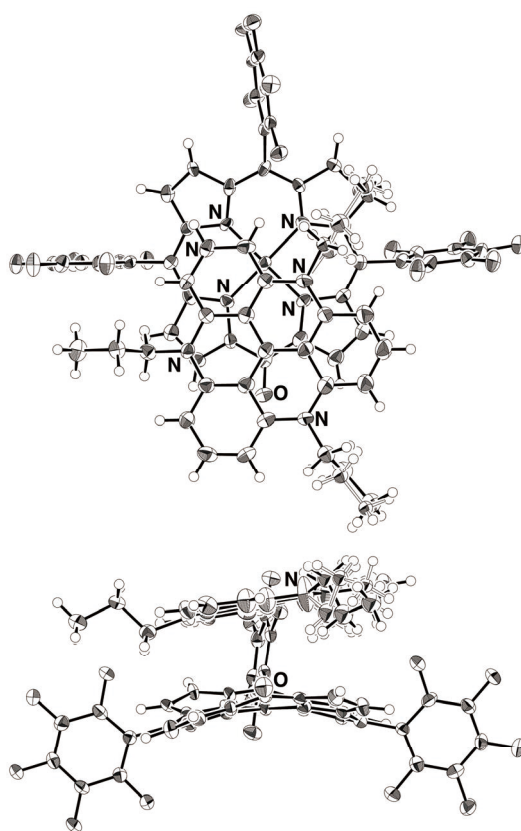

**Fig. S14** Ortep drawings of single-crystal X-ray structure (top and side views) of **2ni**<sup>-</sup>-TATA<sup>+</sup>. Thermal ellipsoids are scaled to the 50% probability level. A propyl group of TATA<sup>+</sup> has disordered structures in the ratio of 63 (black bond) : 37 (white bond).



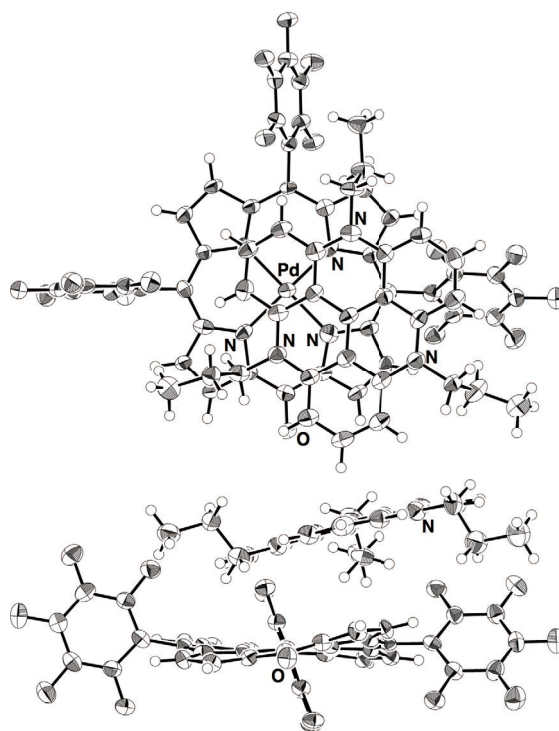

**Fig. S15** Ortep drawings of single-crystal X-ray structure (top and side views) of  $2pd^-TATA^+$ . Thermal ellipsoids are scaled to the 50% probability level.

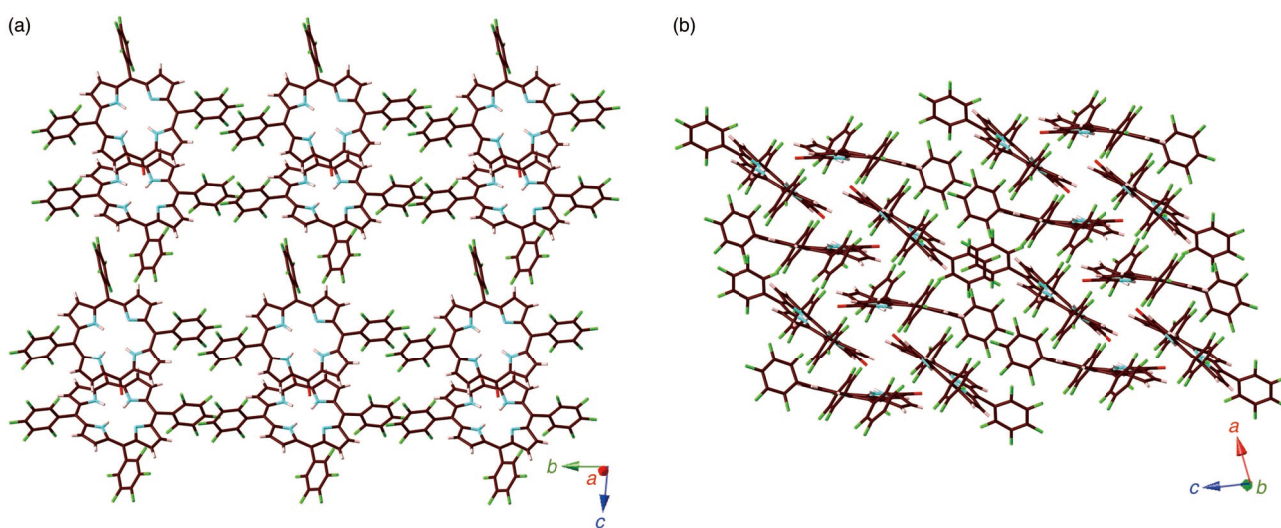

**Fig. S16** Packing diagrams (stacking assemblies) of  $2-o$  as (a) top and (b) side views. Atom color code: brown, pink, cyan, red, and green refer to carbon, hydrogen, nitrogen, oxygen, and fluorine, respectively.

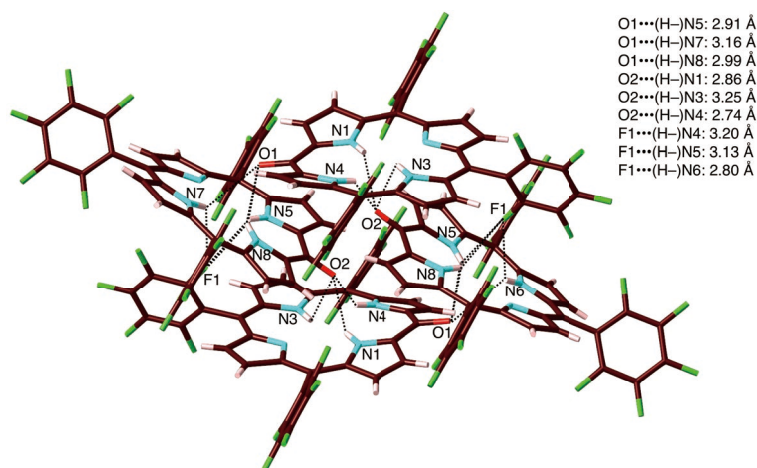

**Fig. S17** Packing diagram of **2-o**. Intermolecular hydrogen-bonding O...H-N distances between O atom and inner NH were 2.91, 3.16, 2.99, 2.86, 3.25, and 2.74 Å. Hydrogen-bonding interactions were also observed between F atom of C<sub>6</sub>F<sub>5</sub> group and inner NH with F...H-N distances of 3.20, 3.13, and 2.80 Å. Atom color code: brown, pink, cyan, red, and green refer to carbon, hydrogen, nitrogen, oxygen, and fluorine, respectively.

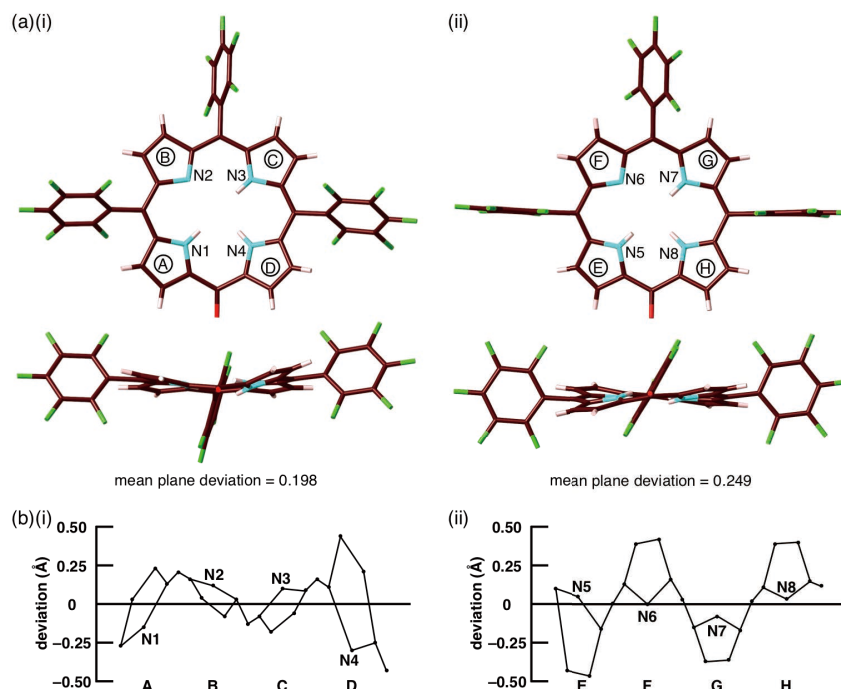

**Fig. S18** (a) Top and side views of crystal structures of **2-o** as two independent structures ((i) and (ii)) with mean-plane deviations (Å) of porphyrin 24-atom planes and (b) linear displays of the deviations (Å) from the plane of 24 atoms for two independent structures. Atom color code: brown, pink, cyan, red, and green refer to carbon, hydrogen, nitrogen, oxygen, and fluorine, respectively.

**Table S2** Dihedral angles (°) between A, B, C, and D rings (planes of five atoms of pyrrole units) and those between E, F, G, and H rings (planes of five atoms of pyrrole units) of **2-o** (the structure in Fig. S18a(ii)).

|   | B    | C    | D    |
|---|------|------|------|
| A | 14.2 | 14.8 | 32.0 |
| B | –    | 0.9  | 19.6 |
| C | –    | –    | 19.5 |
|   | F    | G    | H    |
| E | 17.5 | 21.8 | 17.4 |
| F | –    | 13.9 | 22.2 |
| G | –    | –    | 13.7 |

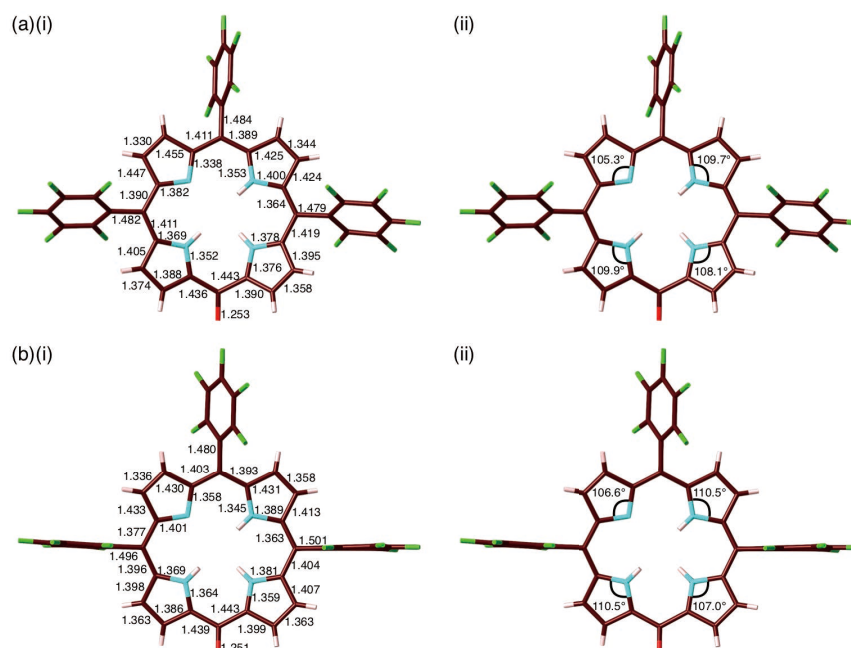

**Fig. S19** Two independent structures ((a) and (b)) of **2-o** with (i) bond lengths (Å) and (ii) C–N–C angles. The C–N–C angles of the structure in (a) were 109.9°, 105.3°, 109.7°, and 108.1°, and the distance between O atom and *meso*-C atom was 1.253 Å. The C–N–C angles of the structure in (b) were 110.5°, 106.6°, 110.5°, and 107.0°, and the distance between O atom and *meso*-C atom was 1.251 Å. These angles and distances suggested the oxophlorin-type structures. Atom color code: brown, pink, cyan, red, and green refer to carbon, hydrogen, nitrogen, oxygen, and fluorine, respectively.

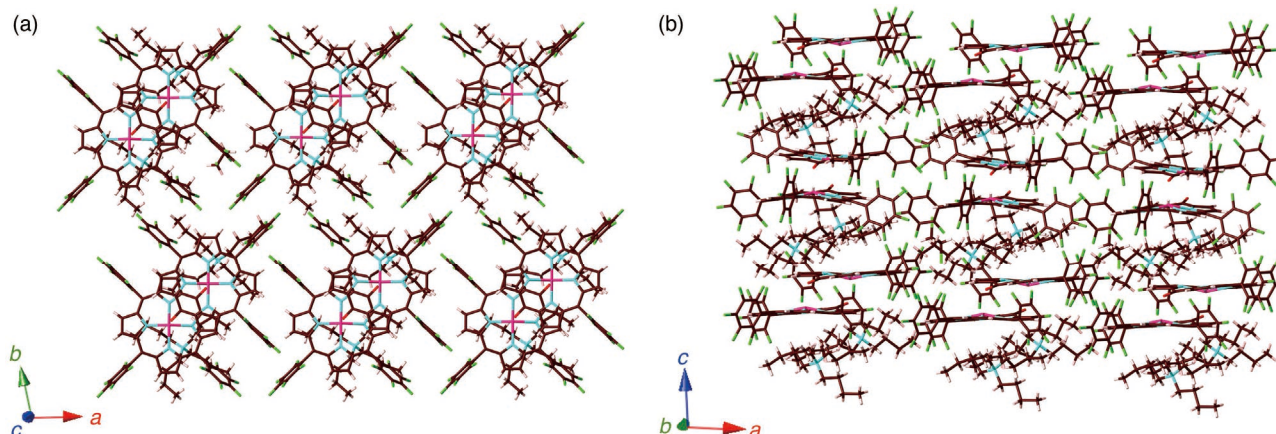

**Fig. S20** Packing diagrams (stacking assemblies) of **2zn<sup>-</sup>**-TBA<sup>+</sup> as (a) top and (b) side views, which show the charge-by-charge assembly mode, wherein **2zn<sup>-</sup>** formed the dimer through coordination bond between Zn atom and anionic O atom. Atom color code: brown, pink, cyan, red, green, and magenta refer to carbon, hydrogen, nitrogen, oxygen, fluorine, and zinc, respectively.



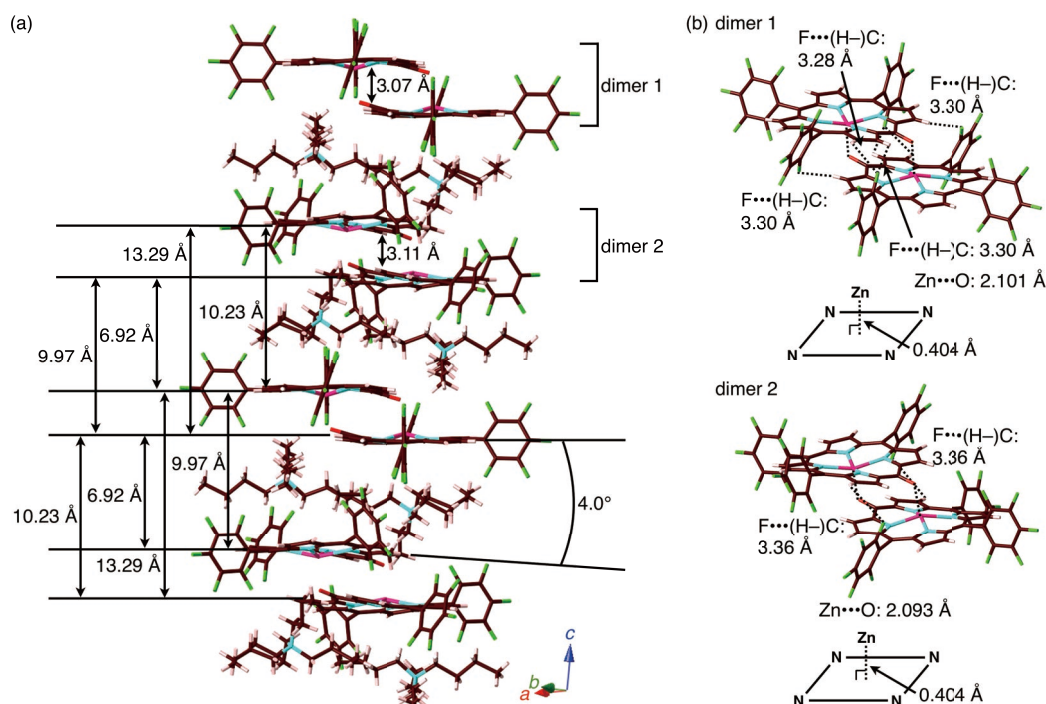

**Fig. S21** Packing diagrams of  $2\text{zn}^-$ -TBA<sup>+</sup> as (a) side view of charge-by-charge column and (b) dimers of laterally located anions. The distances between two  $2\text{zn}^-$  (24-atom plane) were 10.23, 6.92, 13.29, and 9.97 Å. The dihedral angle between two  $2\text{zn}^-$  (24-atom plane) was 4.0°. The  $2\text{zn}^-$  dimers (dimer 1 and dimer 2) were formed through coordination bond between Zn atom and anionic O atom, wherein the distance between Zn and O were 2.101 and 2.093 Å for dimer 1 and dimer 2, respectively. The distance between two  $2\text{zn}^-$  (11-atom plane of dipyrin unit) were 3.07 and 3.11 Å for dimer 1 and dimer 2, respectively. Dimer 1 showed intermolecular hydrogen bonding between F of C<sub>6</sub>F<sub>5</sub> group and porphyrin-β-CH with F...H-C distances of 3.28 and 3.30 Å. Dimer 2 also showed intermolecular hydrogen bonding with an F...H-C distance of 3.36 Å. Both dimer 1 and dimer 2 showed the distance of 0.404 Å between Zn atom and plane of four N atoms. Atom color code: brown, pink, cyan, red, green, and magenta refer to carbon, hydrogen, nitrogen, oxygen, fluorine, and zinc, respectively.

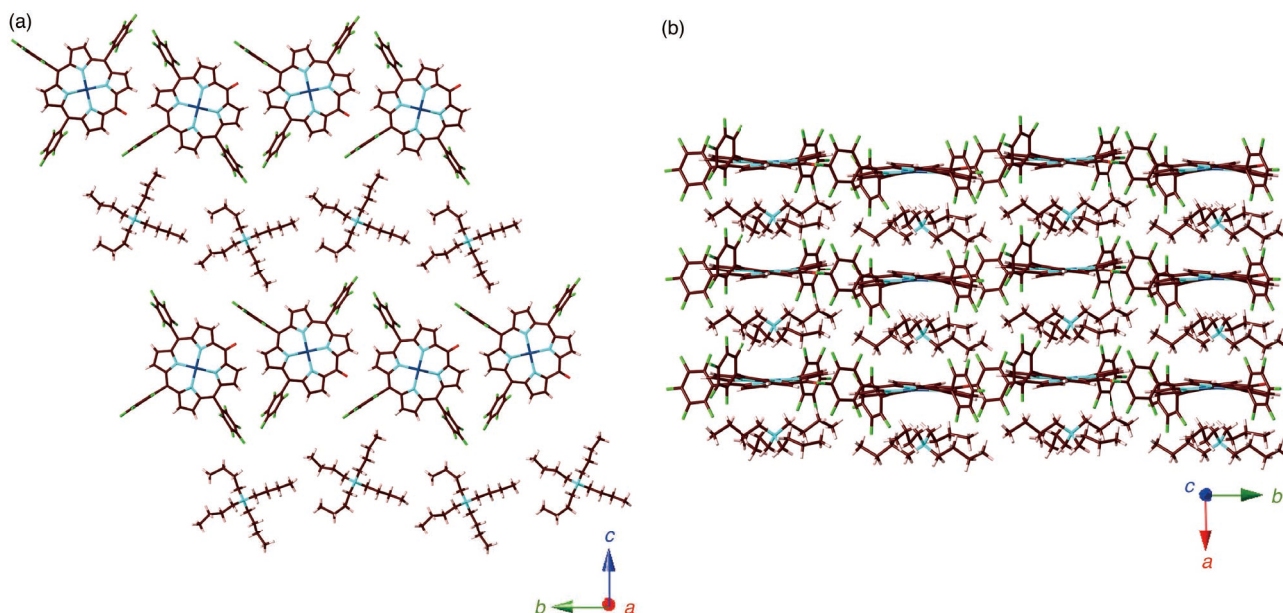

**Fig. S22** Packing diagrams (stacking assemblies) of  $2\text{pd}^-$ -TBA<sup>+</sup> as (a) top and (b) side views, which show the charge-by-charge assembly mode. Atom color code: brown, pink, cyan, red, green, and blue refer to carbon, hydrogen, nitrogen, oxygen, fluorine, and palladium, respectively.

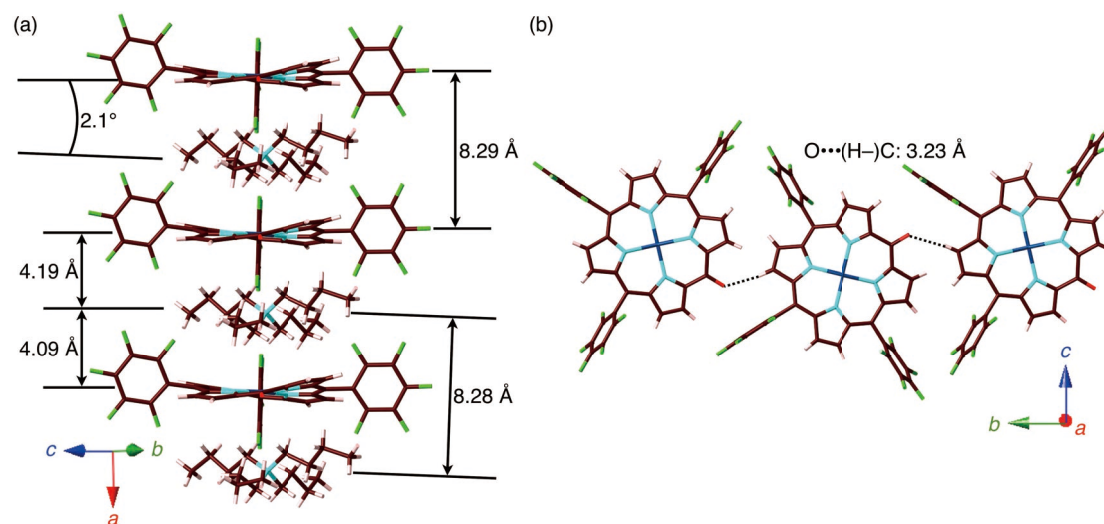

**Fig. S23** Packing diagrams of  $2pd^-$ - $TBA^+$  as (a) side view of charge-by-charge column and (b) top view of laterally located anions. The distance between two  $2pd^-$  (24-atom plane) was  $8.29 \text{ \AA}$  and that between two  $TBA^+$  (17-atom plane) was  $8.28 \text{ \AA}$ . The dihedral angle between  $2pd^-$  (24-atom plane) and  $TBA^+$  (17-atom plane) was  $2.1^\circ$ . The distances between  $2pd^-$  (24-atom plane) and  $TBA^+$  (17-atom plane) were  $4.09$  and  $4.19 \text{ \AA}$ . Intermolecular hydrogen-bonding  $O \cdots (H-C)$  distance between anionic O atom and porphyrin- $\beta$ -CH was  $3.23 \text{ \AA}$ . The plane of  $TBA^+$  was defined by one N atom and 16 C atoms. Atom color code: brown, pink, cyan, red, green, and blue refer to carbon, hydrogen, nitrogen, oxygen, fluorine, and palladium, respectively.

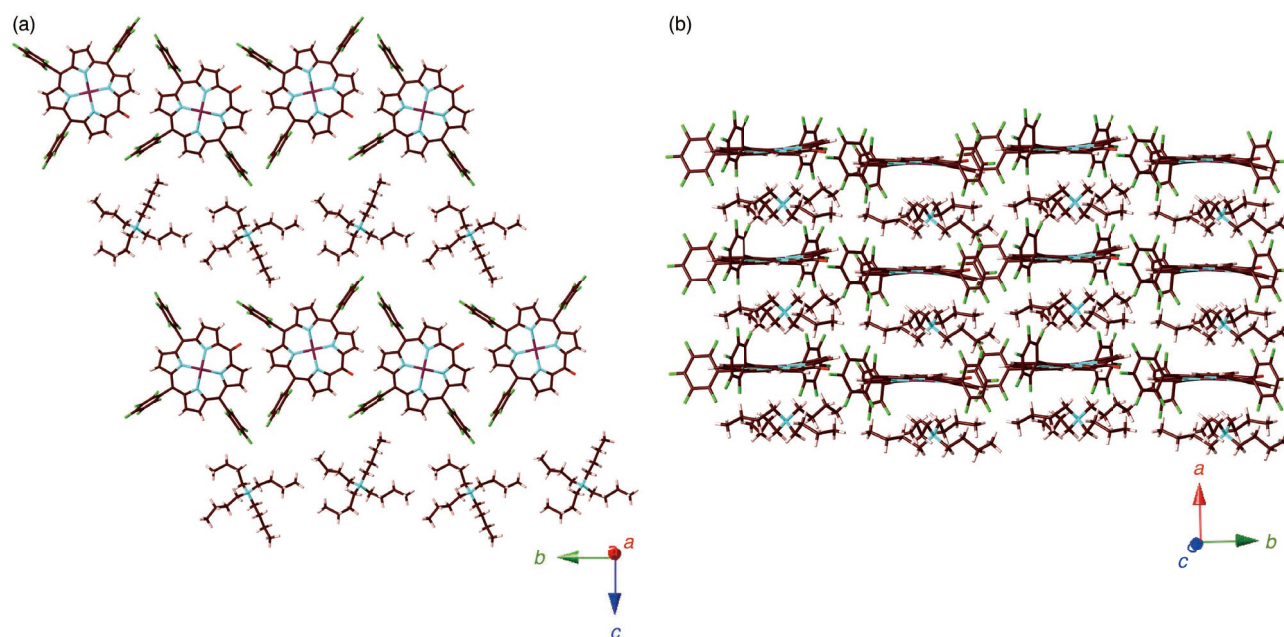

**Fig. S24** Packing diagrams (stacking assemblies) of  $2pt^-$ - $TBA^+$  as (a) top and (b) side views, which show the charge-by-charge assembly mode. Atom color code: brown, pink, cyan, red, green, and purple refer to carbon, hydrogen, nitrogen, oxygen, fluorine, and platinum, respectively.

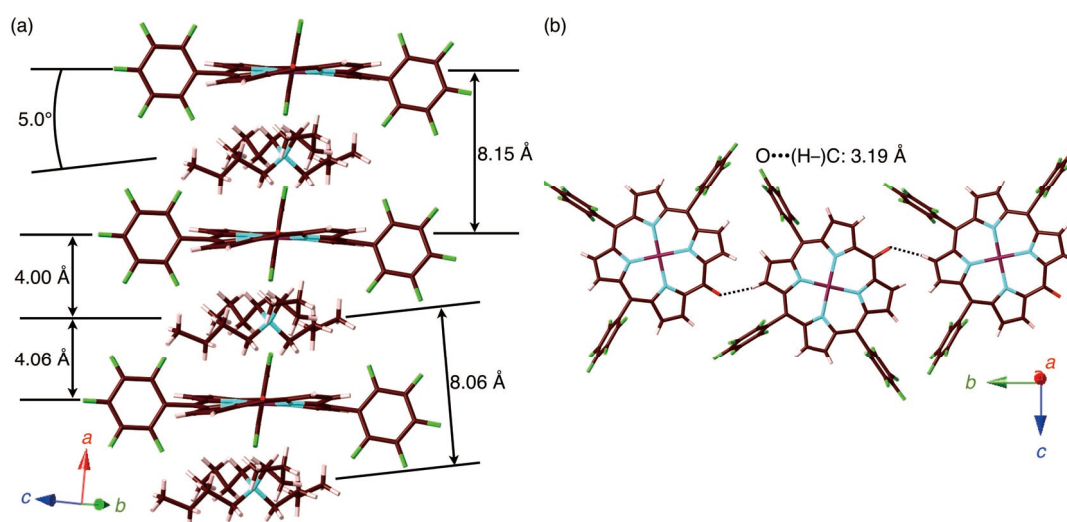

**Fig. S25** Packing diagrams of **2pt**<sup>-</sup>-TBA<sup>+</sup> as (a) side view of charge-by-charge column and (b) top view of laterally located anions. The distance between two **2pt**<sup>-</sup> (24-atom plane) was 8.15 Å and that between two TBA<sup>+</sup> (17-atom plane) was 8.06 Å. The dihedral angle between **2pt**<sup>-</sup> (24-atom plane) and TBA<sup>+</sup> (17-atom plane) was 5.0°. The distances between **2pt**<sup>-</sup> (24-atom plane) and TBA<sup>+</sup> (17-atom plane) were 4.00 and 4.06 Å. Intermolecular hydrogen-bonding O...H-C distance between anionic O atom and porphyrin-β-CH was 3.12 Å. The plane of TBA<sup>+</sup> was defined by one N atom and 16 C atoms. Atom color code: brown, pink, cyan, red, green, and purple refer to carbon, hydrogen, nitrogen, oxygen, fluorine, and platinum, respectively.

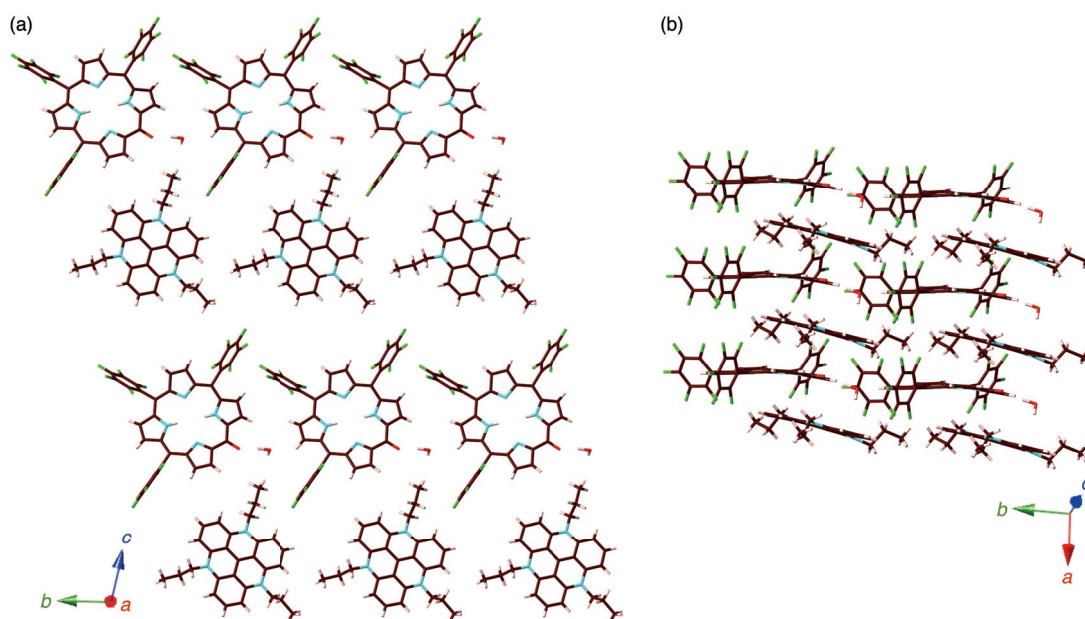

**Fig. S26** Packing diagrams (stacking assemblies) of **2**<sup>-</sup>-TATA<sup>+</sup> as (a) top and (b) side views, which show the charge-by-charge assembly mode. Atom color code: brown, pink, cyan, red, and green refer to carbon, hydrogen, nitrogen, oxygen, and fluorine, respectively.



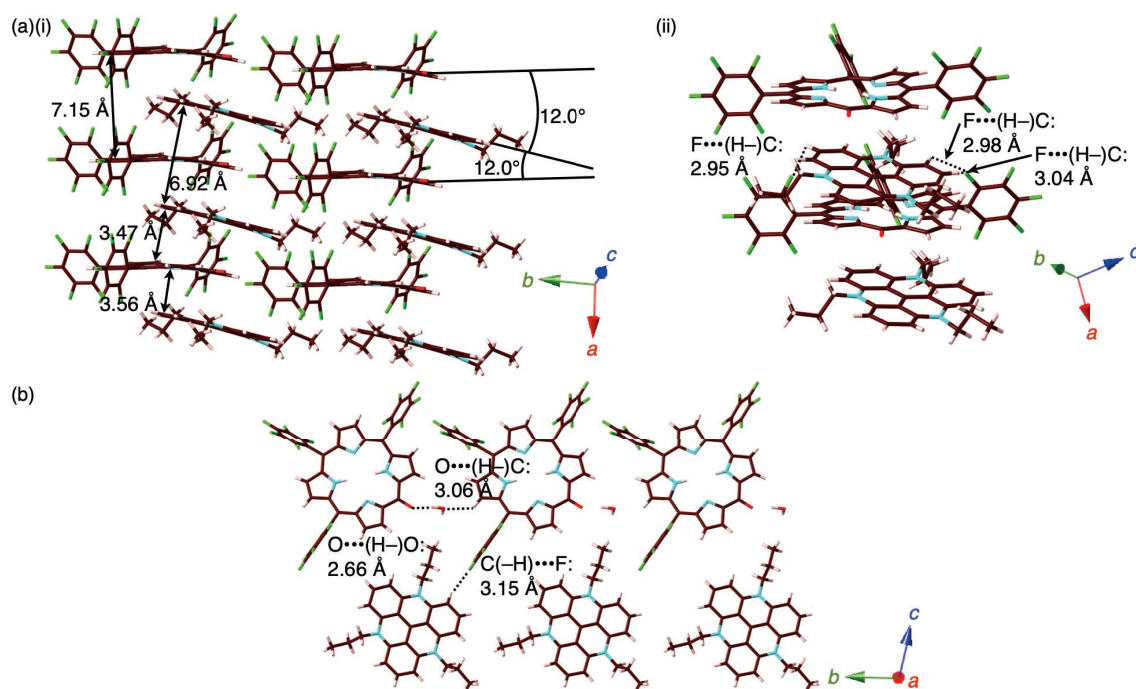

**Fig. S27** Packing diagrams of  $2^-$ -TATA $^+$  showing (a) side and (b) top views. The distance between two  $2^-$  (24-atom plane) was 7.15 Å and that between two TATA $^+$  (22-atom plane) was 6.92 Å. The dihedral angle between  $2^-$  (24-atom plane) and TATA $^+$  (22-atom plane) was 12.0°. Packing structure was formed through  $\pi$ - $\pi$  interactions and hydrogen bonding. The distances between  $2^-$  (11-atom plane of dipyrin unit) and TATA $^+$  (14-atom plane of acridine unit) were 3.47 and 3.56 Å. Furthermore, intermolecular hydrogen-bonding  $F\cdots(H-C)$  distances between F of  $C_6F_5$  group and CH of TATA $^+$  were 2.95, 2.98, 3.04, and 3.15 Å. Hydrogen-bonding interactions were also observed between porphyrin-O and water and between porphyrin- $\beta$ -CH and water with an  $O\cdots(H-O)$  distance of 2.66 Å and a  $C(H)\cdots O$  distance of 3.06 Å, respectively. Atom color code: brown, pink, cyan, red, and green refer to carbon, hydrogen, nitrogen, oxygen, and fluorine, respectively.

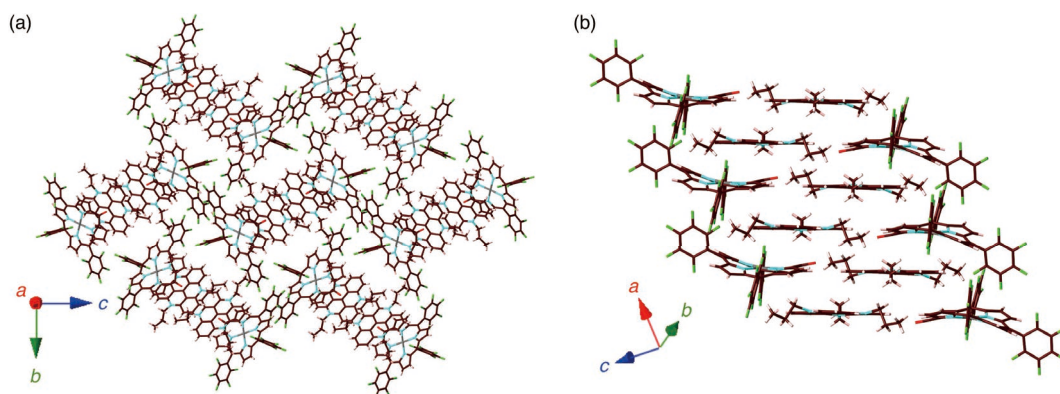

**Fig. S28** Packing diagrams (stacking assemblies) of  $2ni^-$ -TATA $^+$  as (a) top and (b) side views, which show the contribution of both charge-by-charge and charge-segregated modes. Atom color code: brown, pink, cyan, red, green, and gray refer to carbon, hydrogen, nitrogen, oxygen, fluorine, and nickel, respectively.

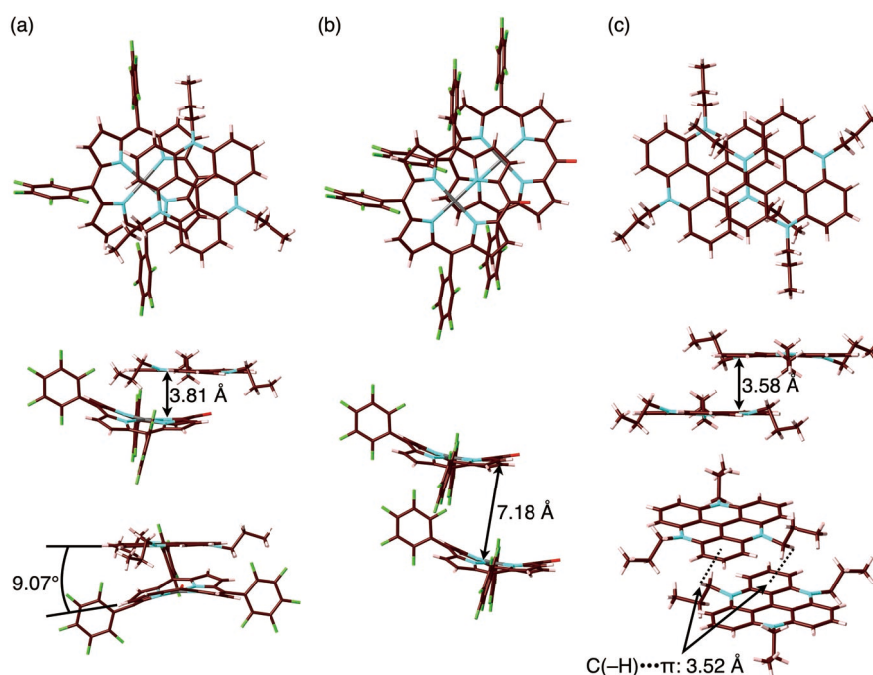

**Fig. S29** Packing diagrams of  $2\text{ni}^-$ -TATA $^+$  showing top and side views of (a) ion pair, (b) pair of anions, and (c) pair of cations. The distance and dihedral angle between  $2\text{ni}^-$  (24-atom plane) and TATA $^+$  (22-atom plane) were 3.81 Å and 9.07°, respectively. The distance between two  $2\text{ni}^-$  (24-atom plane) was 7.18 Å and that between two TATA $^+$  (22-atom plane) was 3.58 Å. Furthermore, the C–H⋯ $\pi$  distance between  $\pi$ -plane and alkyl units of TATA $^+$  was 3.52 Å. Atom color code: brown, pink, cyan, red, green, and gray refer to carbon, hydrogen, nitrogen, oxygen, fluorine, and nickel, respectively.

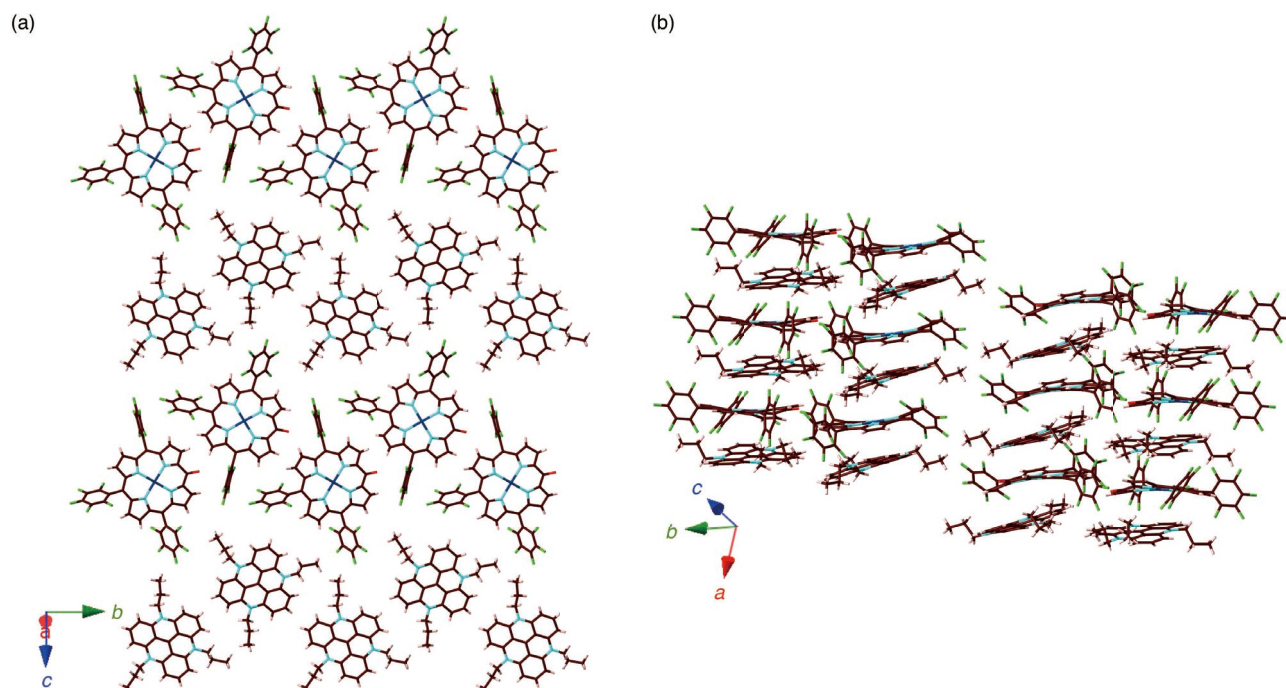

**Fig. S30** Packing diagrams (stacking assemblies) of  $2\text{pd}^-$ -TATA $^+$  as (a) top and (b) side views, which show the charge-by-charge assembly mode. Atom color code: brown, pink, cyan, red, green, and blue refer to carbon, hydrogen, nitrogen, oxygen, fluorine, and palladium, respectively.

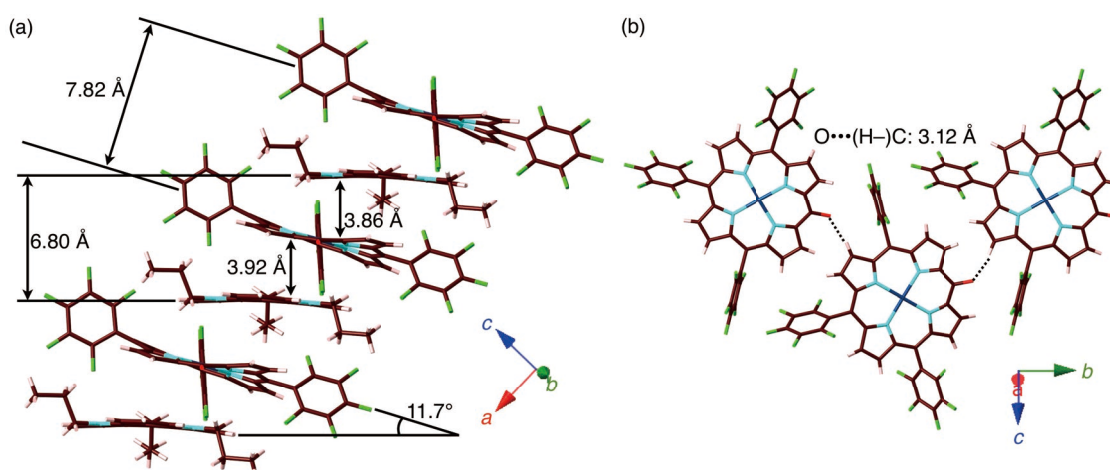

**Fig. S31** Packing diagrams of **2pd**<sup>-</sup>-TATA<sup>+</sup> as (a) side view of charge-by-charge column and (b) top view of laterally located anions. The distance between two **2pd**<sup>-</sup> (24-atom plane) was 7.82 Å and that between two TATA<sup>+</sup> (22-atom plane) was 6.80 Å. The dihedral angle between **2pd**<sup>-</sup> (24-atom plane) and TATA<sup>+</sup> (22-atom plane) was 11.7°. Packing structure was formed through  $\pi$ - $\pi$  interactions and hydrogen bonding. The distances between **2pd**<sup>-</sup> (11-atom plane of dipyrin unit) and TATA<sup>+</sup> (22-atom plane) were 3.86 and 3.92 Å. Furthermore, intermolecular hydrogen-bonding O... (H-)C distance between anionic O atom and porphyrin- $\beta$ -CH was 3.12 Å. Atom color code: brown, pink, cyan, red, green, and blue refer to carbon, hydrogen, nitrogen, oxygen, fluorine, and palladium, respectively.

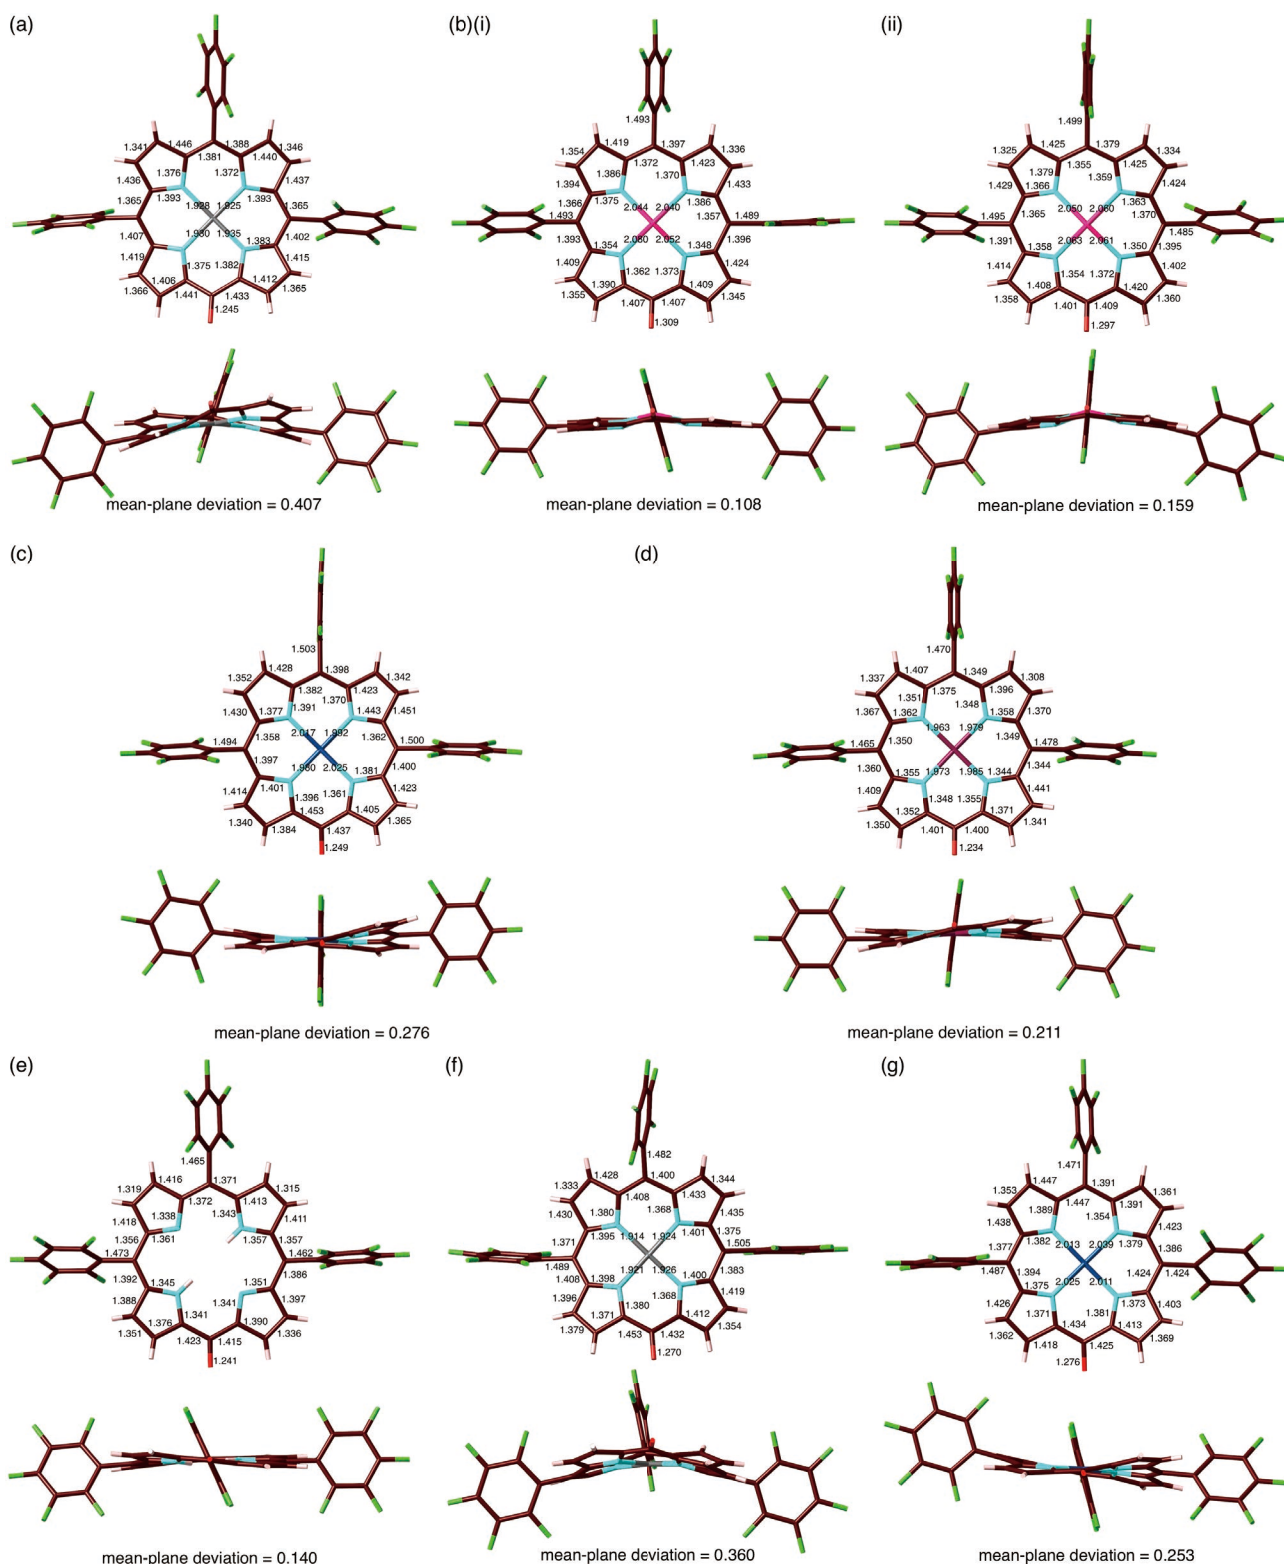

**Fig. S32** Top and side views of crystal structures of porphyrin anions in (a)  $2\text{Ni}^- \cdot \text{TBA}^+$ ,<sup>[S5b]</sup> (b)  $2\text{Zn}^- \cdot \text{TBA}^+$  (two independent structures ((i) and (ii))), (c)  $2\text{Pd}^- \cdot \text{TBA}^+$ , (d)  $2\text{Pt}^- \cdot \text{TBA}^+$ , (e)  $2^- \cdot \text{TATA}^+$ , (f)  $2\text{Ni}^- \cdot \text{TATA}^+$ , and (g)  $2\text{Pd}^- \cdot \text{TATA}^+$  with bond lengths (Å) and mean-plane deviations (Å) of porphyrin 24-atom planes. Atom color code: brown, pink, cyan, red, green, gray, magenta, blue, and purple refer to carbon, hydrogen, nitrogen, oxygen, fluorine, nickel, zinc, palladium, and platinum, respectively.



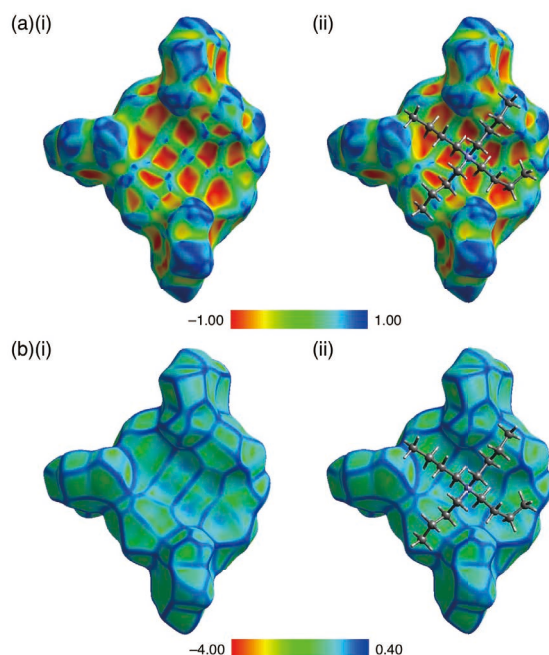

**Fig. S33** Hirshfeld surface<sup>[S10]</sup> of  $2\text{ni}^-$  in the crystal structure of  $2\text{ni}^- \cdot \text{TBA}^+$ <sup>[S5b]</sup> mapped over (a) shape-index property and (b) curvedness property: (i) only surface and (ii) surface with a ball-and-stick model of the neighboring  $\text{TBA}^+$ . Shape index is a qualitative measure of shape and is sensitive to subtle changes in surface shape, particularly in a flat region by differing by sign represent complementary bumps (blue) and hollows (red), whereas curvedness is a function of the root-mean-square curvature of the surface, and maps of curvedness typically show large regions of green (relatively flat) separated by dark blue edges (large positive curvature). The surface of  $2\text{ni}^-$  mapped over shape-index property exhibited depressions above the  $\pi$ -planes, suggesting that the stacking structures were stabilized by  $\text{CH}-\pi$  interaction. Atom color code: gray, white, and blue refer to carbon, hydrogen, and nitrogen, respectively.

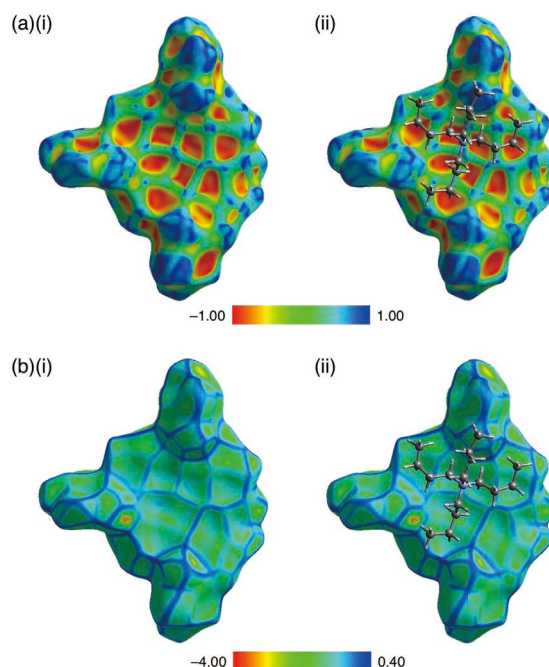

**Fig. S34** Hirshfeld surface<sup>[S10]</sup> of representative  $2\text{zn}^-$  in the crystal structure of  $2\text{zn}^- \cdot \text{TBA}^+$  (Fig. S20,21) mapped over (a) shape-index property and (b) curvedness property: (i) only surface and (ii) surface with a ball-and-stick model of the neighboring  $\text{TBA}^+$ . Shape index is a qualitative measure of shape and is sensitive to subtle changes in surface shape, particularly in a flat region by differing by sign represent complementary bumps (blue) and hollows (red), whereas curvedness is a function of the root-mean-square curvature of the surface, and maps of curvedness typically show large regions of green (relatively flat) separated by dark blue edges (large positive curvature). The surface of  $2\text{zn}^-$  mapped over shape-index property exhibited depressions above the  $\pi$ -planes, suggesting that the stacking structures were stabilized by  $\text{CH}-\pi$  interaction. Atom color code: gray, white, and blue refer to carbon, hydrogen, and nitrogen, respectively.

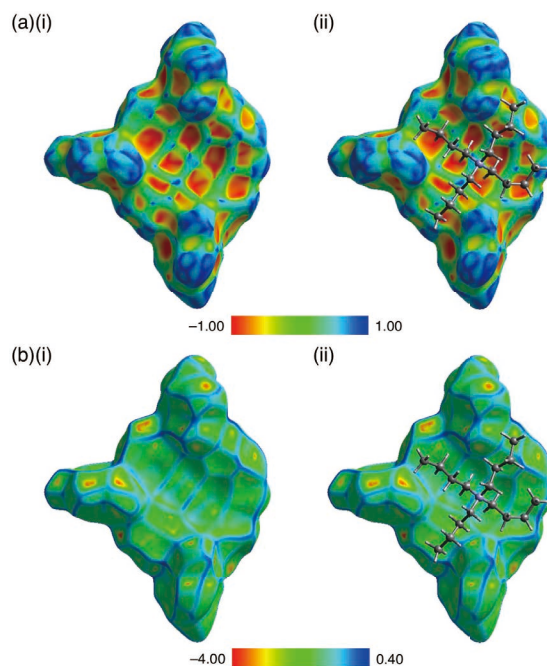

**Fig. S35** Hirshfeld surface<sup>[S10]</sup> of **2pd<sup>-</sup>** in the crystal structure of **2pd<sup>-</sup>-TBA<sup>+</sup>** (Fig. S22,23) mapped over (a) shape-index property and (b) curvedness property: (i) only surface and (ii) surface with a ball-and-stick model of the neighboring TBA<sup>+</sup>. Shape index is a qualitative measure of shape and is sensitive to subtle changes in surface shape, particularly in a flat region by differing by sign represent complementary bumps (blue) and hollows (red), whereas curvedness is a function of the root-mean-square curvature of the surface, and maps of curvedness typically show large regions of green (relatively flat) separated by dark blue edges (large positive curvature). The surface of **2pd<sup>-</sup>** mapped over shape-index property exhibited depressions above the  $\pi$ -planes, suggesting that the stacking structures were stabilized by CH- $\pi$  interaction. Atom color code: gray, white, and blue refer to carbon, hydrogen, and nitrogen, respectively.

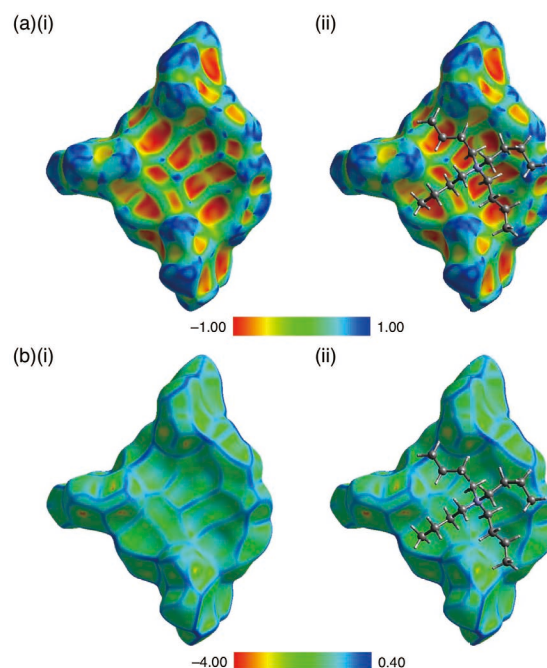

**Fig. S36** Hirshfeld surface<sup>[S10]</sup> of **2pt<sup>-</sup>** in the crystal structure of **2pt<sup>-</sup>-TBA<sup>+</sup>** (Fig. S24,25) mapped over (a) shape-index property and (b) curvedness property: (i) only surface and (ii) surface with a ball-and-stick model of the neighboring TBA<sup>+</sup>. Shape index is a qualitative measure of shape and is sensitive to subtle changes in surface shape, particularly in a flat region by differing by sign represent complementary bumps (blue) and hollows (red), whereas curvedness is a function of the root-mean-square curvature of the surface, and maps of curvedness typically show large regions of green (relatively flat) separated by dark blue edges (large positive curvature). The surface of **2pt<sup>-</sup>** mapped over shape-index property exhibited depressions above the  $\pi$ -planes, suggesting that the stacking structures were stabilized by CH- $\pi$  interaction. Atom color code: gray, white, and blue refer to carbon, hydrogen, and nitrogen, respectively.



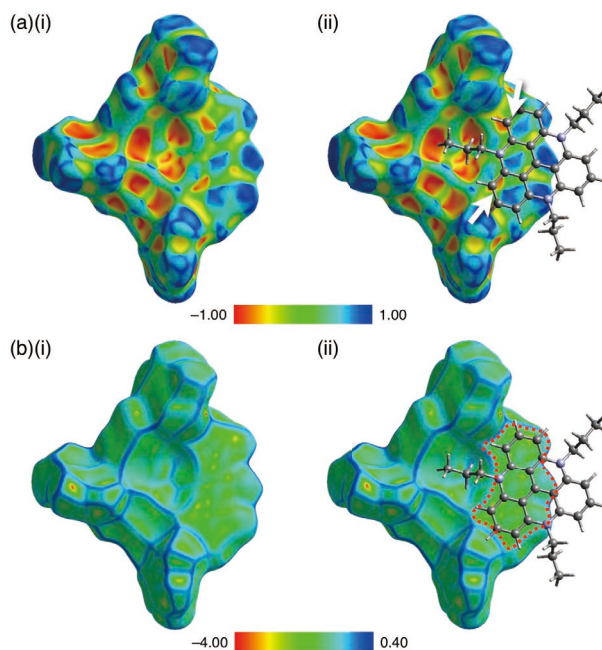

**Fig. S37** Hirshfeld surface<sup>[S10]</sup> of  $2^-$  in the crystal structure of  $2^-$ -TATA $^+$  (Fig. S26,27) mapped over (a) shape-index property and (b) curvedness property: (i) only surface and (ii) surface with a ball-and-stick model of the neighboring TATA $^+$ . Shape index is a qualitative measure of shape and is sensitive to subtle changes in surface shape, particularly in a flat region by differing by sign represent complementary bumps (blue) and hollows (red), whereas curvedness is a function of the root-mean-square curvature of the surface, and maps of curvedness typically show large regions of green (relatively flat) separated by dark blue edges (large positive curvature). The surfaces of  $2^-$  showed the red and blue triangles arranged in bow-tie shapes (indicated by white arrows in (a)) on the shape-index surface and flat region (indicated by red dashed area in (b)) on the curvedness surface, indicating the characteristic mapping pattern for  $^i\pi$ - $^j\pi$  stacking of  $2^-$  and the core part of TATA $^+$ .<sup>[S11]</sup> Atom color code: gray, white, and blue refer to carbon, hydrogen, and nitrogen, respectively.

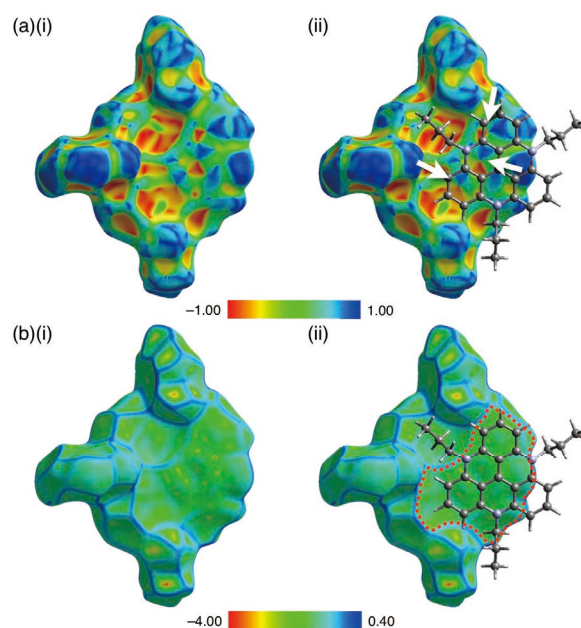

**Fig. S38** Hirshfeld surface<sup>[S10]</sup> of  $2\text{ni}^-$  in the crystal structure of  $2\text{ni}^- \cdot \text{TATA}^+$  (Fig. S28,29) mapped over (a) shape-index property and (b) curvedness property: (i) only surface and (ii) surface with a ball-and-stick model of the neighboring  $\text{TATA}^+$ . Shape index is a qualitative measure of shape and is sensitive to subtle changes in surface shape, particularly in a flat region by differing by sign represent complementary bumps (blue) and hollows (red), whereas curvedness is a function of the root-mean-square curvature of the surface, and maps of curvedness typically show large regions of green (relatively flat) separated by dark blue edges (large positive curvature). The surfaces of  $2\text{ni}^-$  showed the red and blue triangles arranged in bow-tie shapes (indicated by white arrows in (a)) on the shape-index surface and flat region (indicated by red dashed area in (b)) on the curvedness surface, indicating the characteristic mapping pattern for  ${}^i\pi$ - ${}^j\pi$  stacking of  $2\text{ni}^-$  and the core part of  $\text{TATA}^+$ .<sup>[S11]</sup> Atom color code: gray, white, and blue refer to carbon, hydrogen, and nitrogen, respectively.

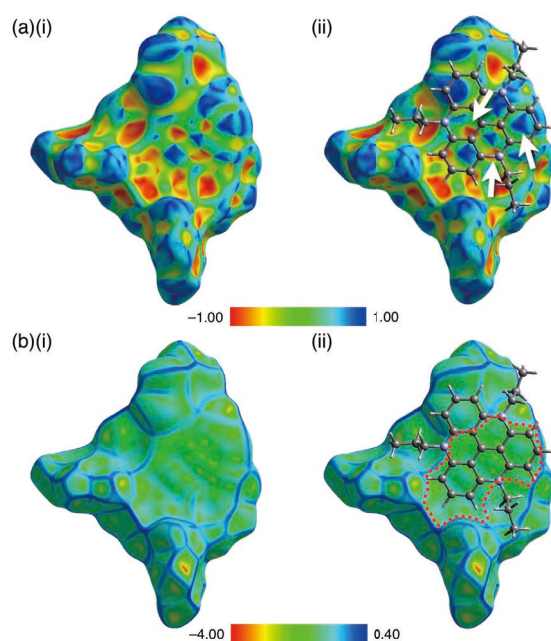

**Fig. S39** Hirshfeld surface<sup>[S10]</sup> of  $2\text{pd}^-$  in the crystal structure of  $2\text{pd}^- \cdot \text{TATA}^+$  (Fig. S30,31) mapped over (a) shape-index property and (b) curvedness property: (i) only surface and (ii) surface with a ball-and-stick model of the neighboring  $\text{TATA}^+$ . Shape index is a qualitative measure of shape and is sensitive to subtle changes in surface shape, particularly in a flat region by differing by sign represent complementary bumps (blue) and hollows (red), whereas curvedness is a function of the root-mean-square curvature of the surface, and maps of curvedness typically show large regions of green (relatively flat) separated by dark blue edges (large positive curvature). The surfaces of  $2\text{pd}^-$  showed the red and blue triangles arranged in bow-tie shapes (indicated by white arrows in (a)) on the shape-index surface and flat region (indicated by red dashed area in (b)) on the curvedness surface, indicating the characteristic mapping pattern for  ${}^i\pi$ - ${}^j\pi$  stacking of  $2\text{pd}^-$  and the core part of  $\text{TATA}^+$ .<sup>[S11]</sup> Atom color code: gray, white, and blue refer to carbon, hydrogen, and nitrogen, respectively.

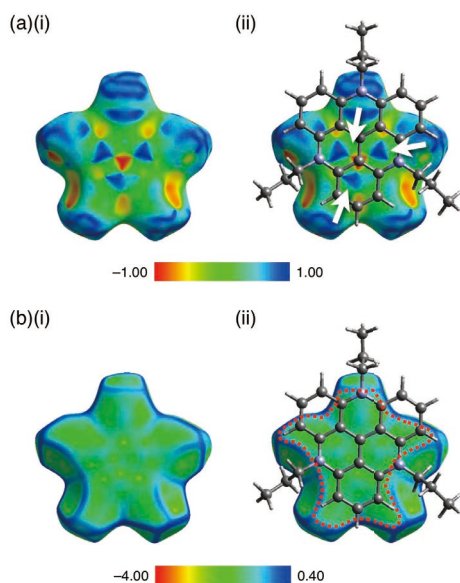

**Fig. S40** Hirshfeld surface<sup>[S10]</sup> of  $\text{PCCp}^-$  in the crystal structure of  $\text{TATA}^+ \cdot \text{PCCp}^-$ <sup>[S12]</sup> mapped over (a) shape-index property and (b) curvedness property: (i) only surface and (ii) surface with a ball-and-stick model of the neighboring  $\text{TATA}^+$ . Shape index is a qualitative measure of shape and is sensitive to subtle changes in surface shape, particularly in a flat region by differing by sign represent complementary bumps (blue) and hollows (red), whereas curvedness is a function of the root-mean-square curvature of the surface, and maps of curvedness typically show large regions of green (relatively flat) separated by dark blue edges (large positive curvature). The surfaces of  $\text{PCCp}^-$  showed the red and blue triangles arranged in bow-tie shapes (indicated by white arrows in (a)) on the shape-index surface and flat region (indicated by red dashed area in (b)) on the curvedness surface, indicating the characteristic mapping pattern for  ${}^i\pi$ - ${}^j\pi$  stacking of  $\text{PCCp}^-$  and the core part of  $\text{TATA}^+$ .<sup>[S11]</sup> Atom color code: gray, white, and blue refer to carbon, hydrogen, and nitrogen, respectively.

## 4. Theoretical studies

**DFT calculations.** DFT calculations for the geometrical optimizations were carried out by using the *Gaussian 09* program.<sup>[S13]</sup>

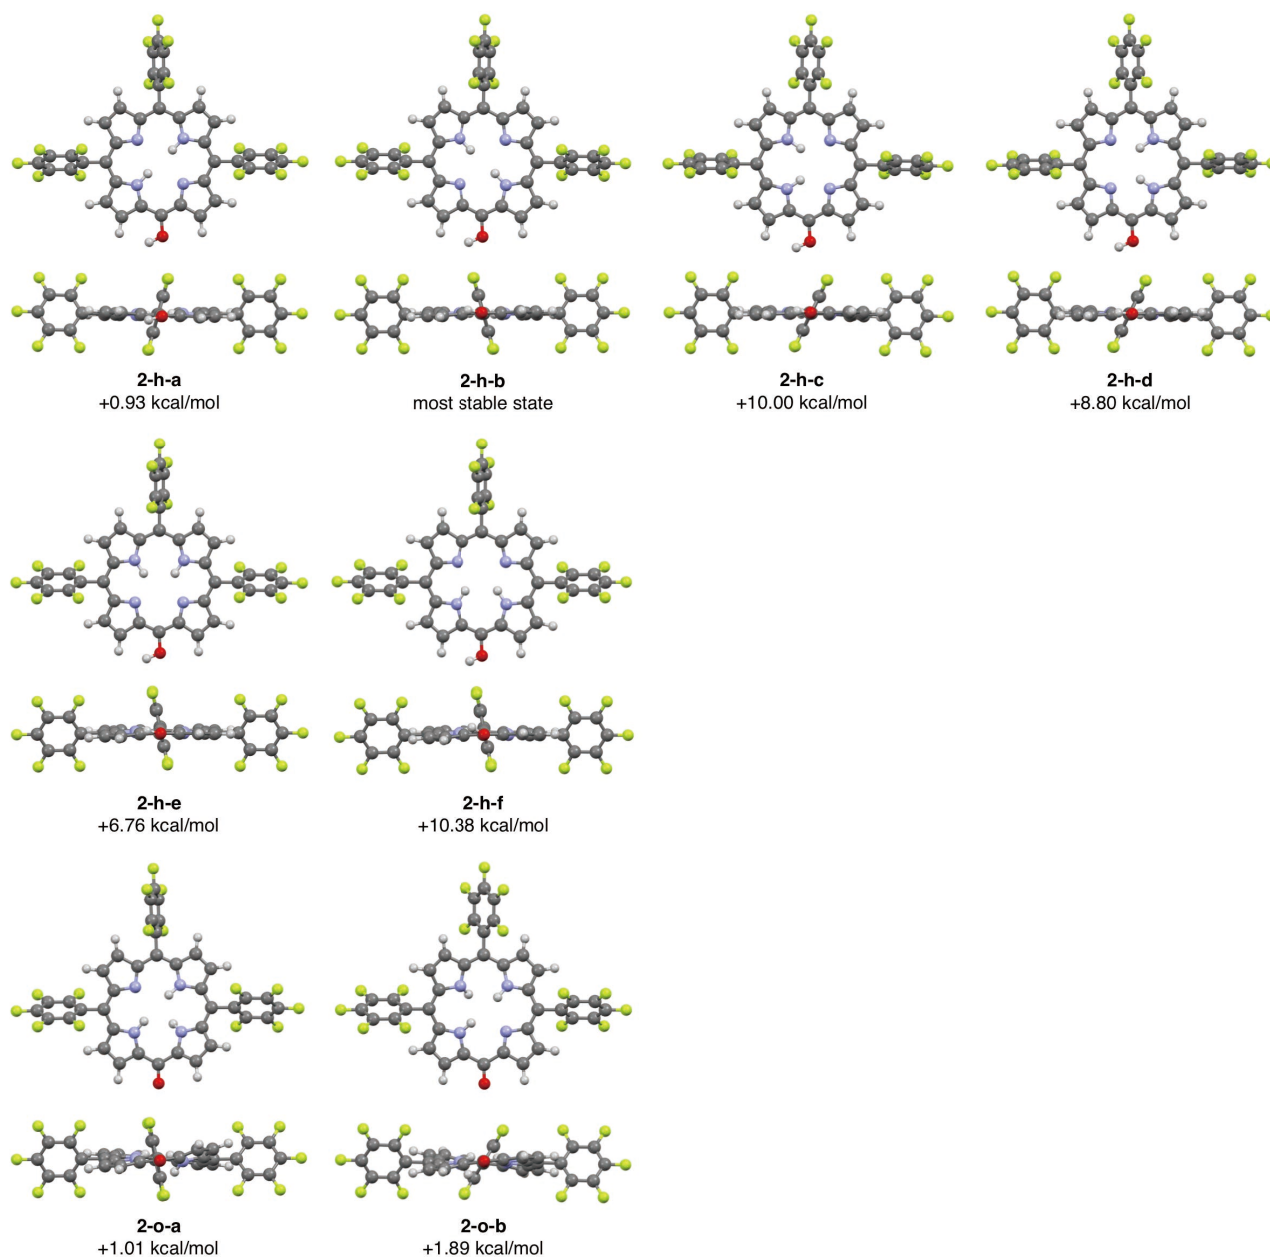

**Fig. S41** Optimized structures of **2** as hydroxyporphyrin-type **2-h**, oxophlorin-type **2-o**, and isooxophlorin-type **2-i** at B3LYP/6-31G(d,p) level. **2-h**, **2-o**, and **2-i** have OH in an inner-2H form, C=O in an inner-3H form, and C=O in a *meso*-CH form, respectively. Hydroxyporphyrin-type tautomer **2-h-b** was the most stable among all the tautomers.

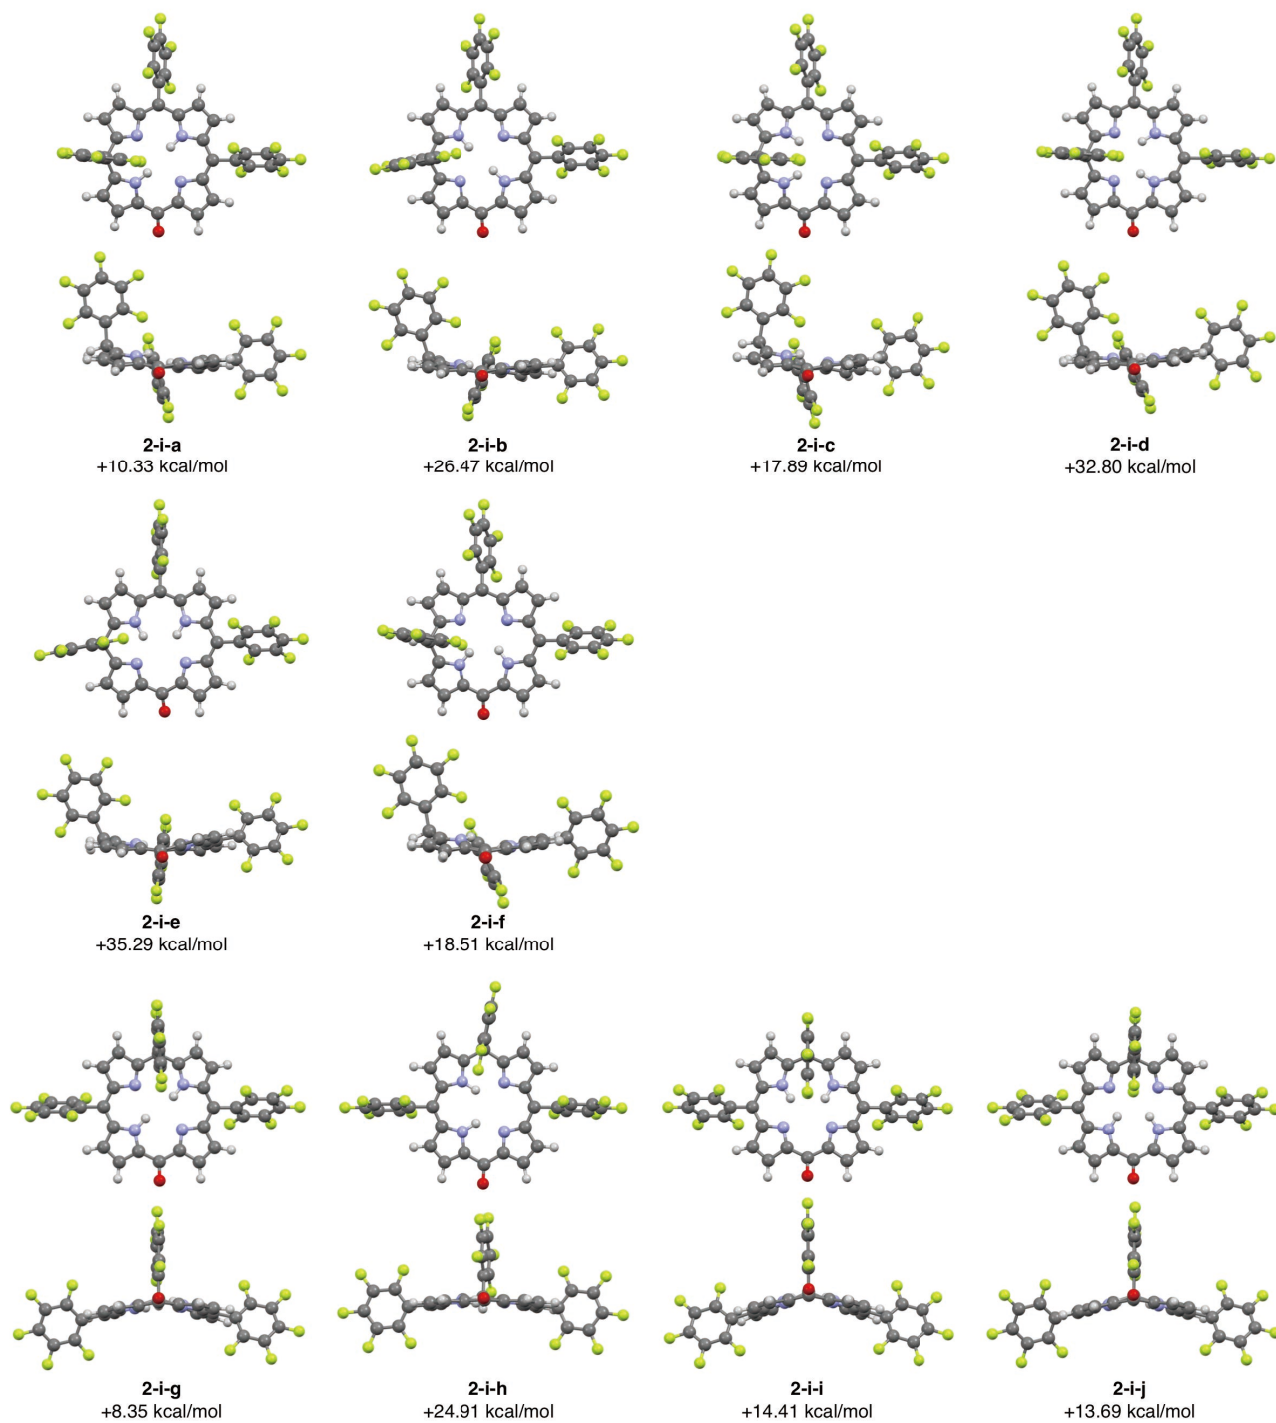

**Fig. S41 (Continued)**



**Table S3** Summarized energy differences (kcal/mol) of hydroxyporphyrin-type and oxophlorin-type tautomers (Fig. S41) of **2** optimized in vacuum at B3LYP/6-31G(d,p) level and in DMSO, CH<sub>3</sub>CN, CH<sub>3</sub>OH, acetone, CH<sub>2</sub>Cl<sub>2</sub>, toluene, and *n*-heptane at PCM-B3LYP/6-31G(d,p), showing small solvent effects. The energy differences among **2-h-a,b** and **2-o-a** (differences between hydroxyporphyrin-type and oxophlorin-type tautomers) were smaller in nonpolar solvents and those were larger in polar solvents. On the other hand, the energy differences between **2-o-a,b** (difference between two oxophlorin-type tautomers) were smaller in polar solvents and those were larger in nonpolar solvents.

|              | vacuum | DMSO  | CH <sub>3</sub> CN | CH <sub>3</sub> OH | acetone | CH <sub>2</sub> Cl <sub>2</sub> | toluene | <i>n</i> -heptane |
|--------------|--------|-------|--------------------|--------------------|---------|---------------------------------|---------|-------------------|
| <b>2-h-a</b> | 0.93   | 1.41  | 1.40               | 1.39               | 1.37    | 1.26                            | 0.68    | 0.77              |
| <b>2-h-b</b> | 0      | 1.09  | 1.07               | 1.06               | 1.02    | 0.84                            | 0.04    | 0                 |
| <b>2-h-c</b> | 10.00  | 9.30  | 9.31               | 9.31               | 9.34    | 9.40                            | 9.36    | 9.49              |
| <b>2-h-d</b> | 8.80   | 8.85  | 8.85               | 8.85               | 8.85    | 8.82                            | 8.47    | 8.52              |
| <b>2-h-e</b> | 6.76   | 7.28  | 7.27               | 7.27               | 7.25    | 7.16                            | 6.61    | 6.62              |
| <b>2-h-f</b> | 10.38  | 10.26 | 10.26              | 10.26              | 10.26   | 10.24                           | 9.94    | 10.02             |
| <b>2-o-a</b> | 1.01   | 0     | 0                  | 0                  | 0       | 0                               | 0       | 0.19              |
| <b>2-o-b</b> | 1.89   | 0.17  | 0.19               | 0.19               | 0.23    | 0.36                            | 0.69    | 0.94              |

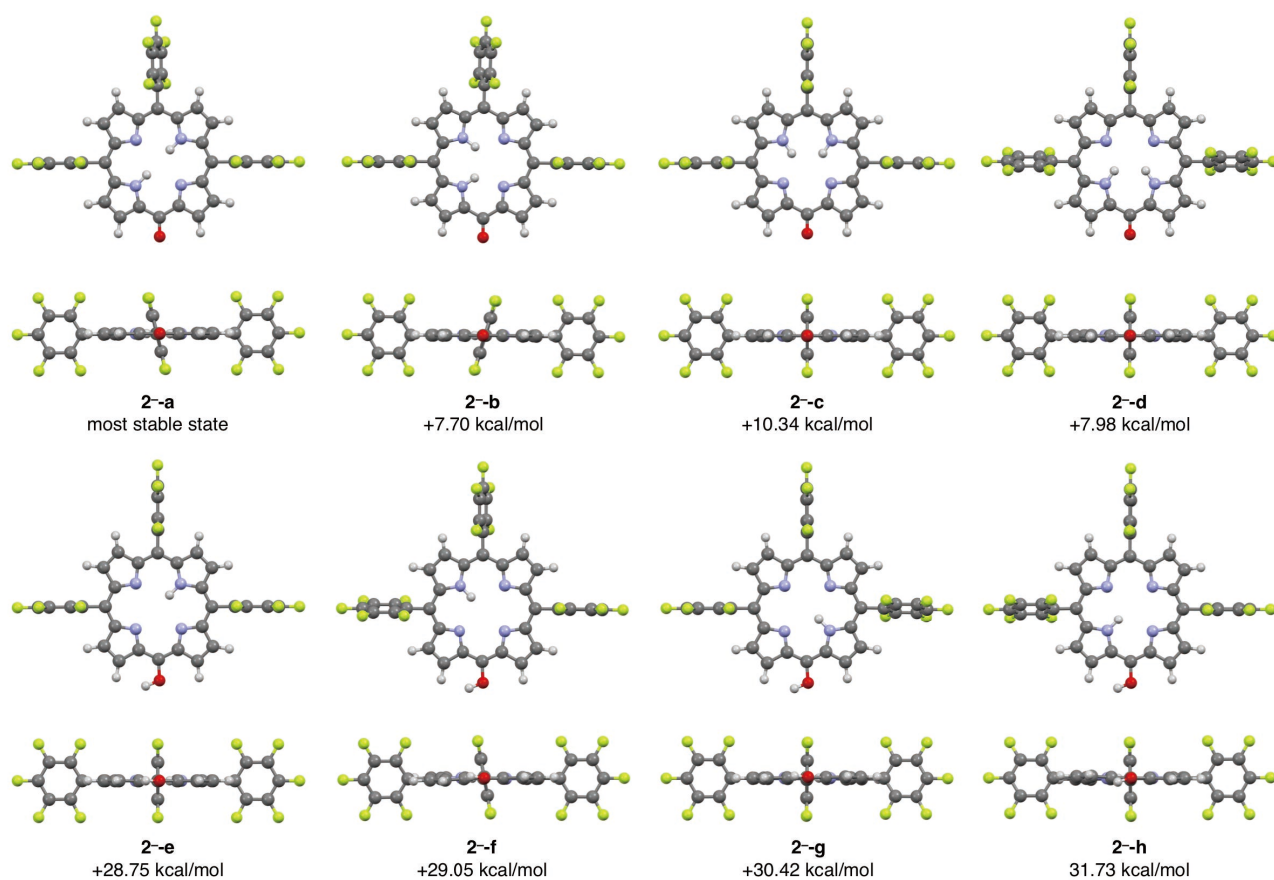

**Fig. S42** Optimized structures (eight representative tautomers) of **2<sup>-</sup>** at B3LYP/6-31+G(d,p) level.

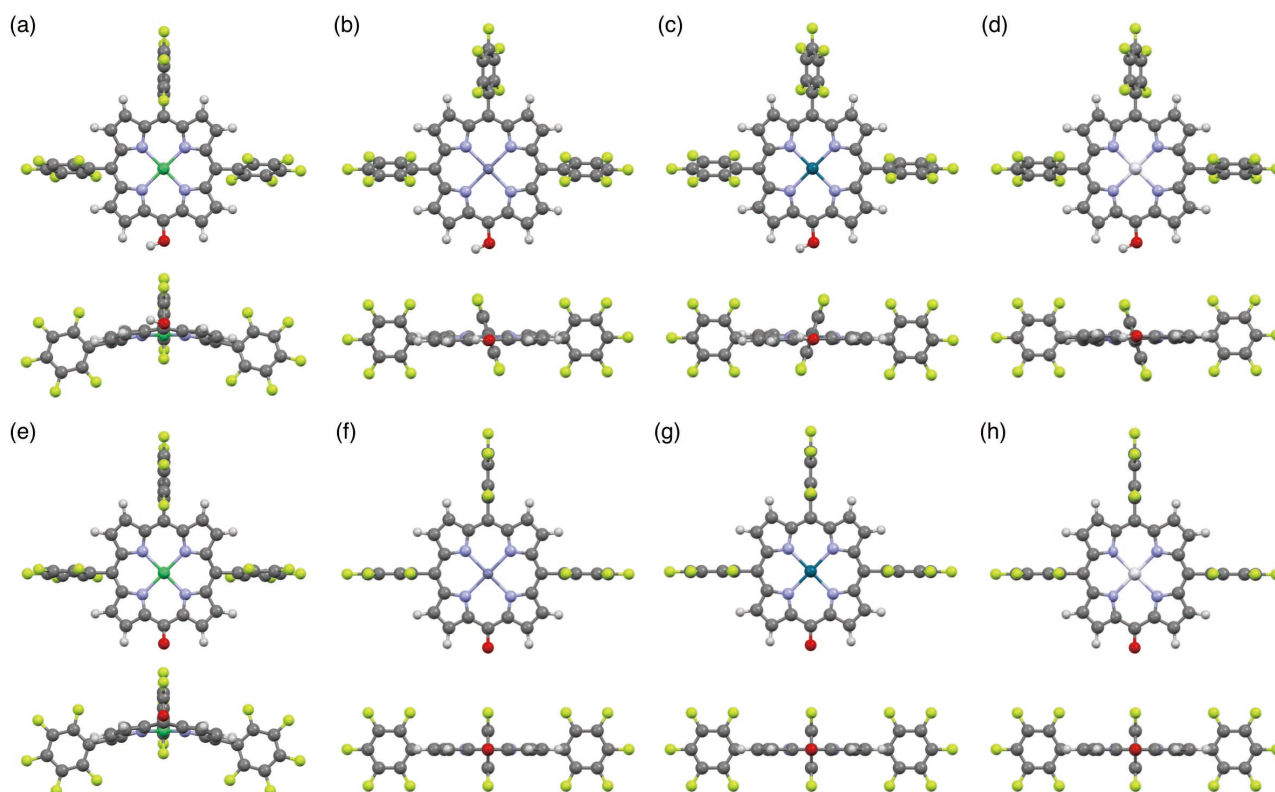

**Fig. S43** Optimized structures of (a) **2ni**, (b) **2zn**, (c) **2pd**, and (d) **2pt** at B3LYP/6-31G(d,p) for C, H, N, O, and F and B3LYP/LanL2DZ for Ni, Zn, Pd, and Pt and (e) **2ni<sup>-</sup>**, (f) **2zn<sup>-</sup>**, (g) **2pd<sup>-</sup>**, and (h) **2pt<sup>-</sup>** at B3LYP/6-31+G(d,p) for C, H, N, O, and F and B3LYP/LanL2DZ for Ni, Zn, Pd, and Pt.

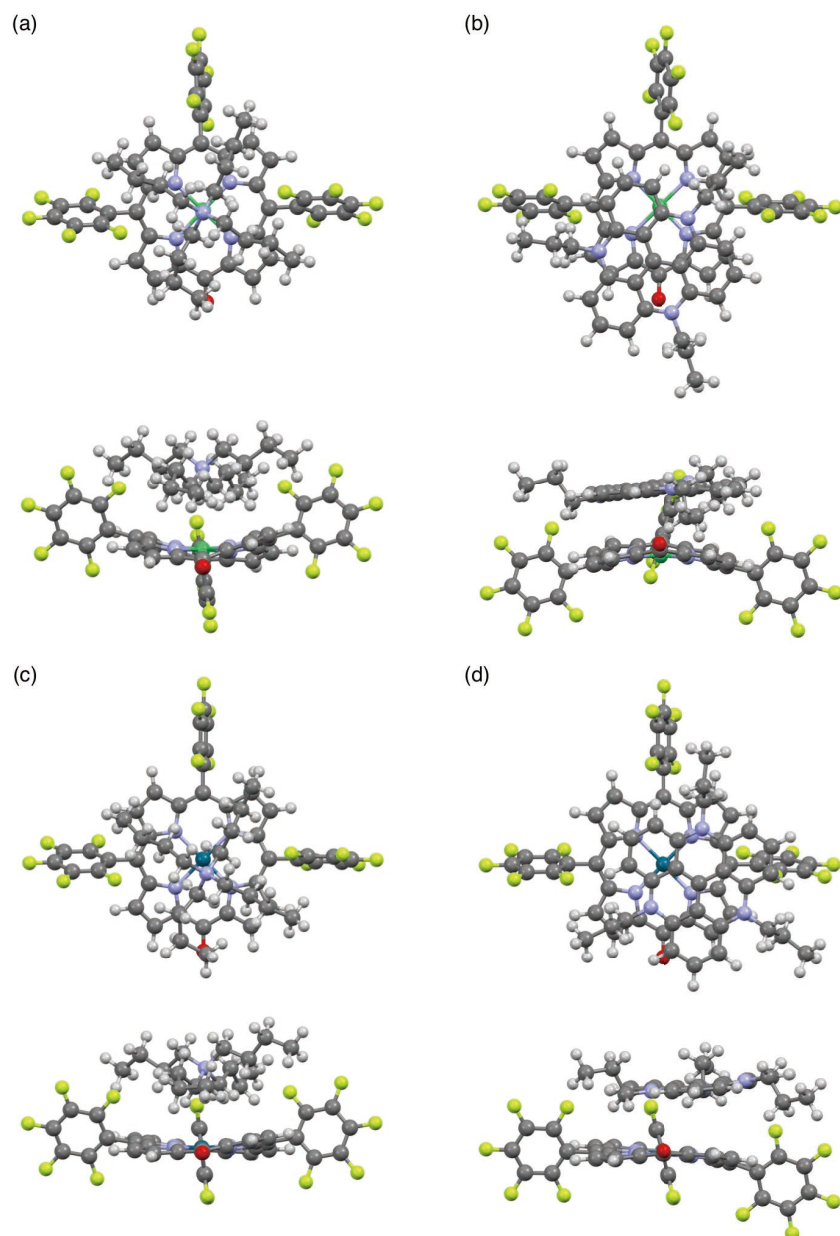

**Fig. S44** Optimized structures of (a)  $2\text{ni-TBA}^+$ , (b)  $2\text{ni-TATA}^+$ , (c)  $2\text{pd-TBA}^+$ , and (d)  $2\text{pd-TATA}^+$ , based on the crystal structures, at B3LYP-GD3BJ/6-31+G(d,p) for C, H, N, O, and F and B3LYP-GD3BJ/LanL2DZ for Ni and Pd.



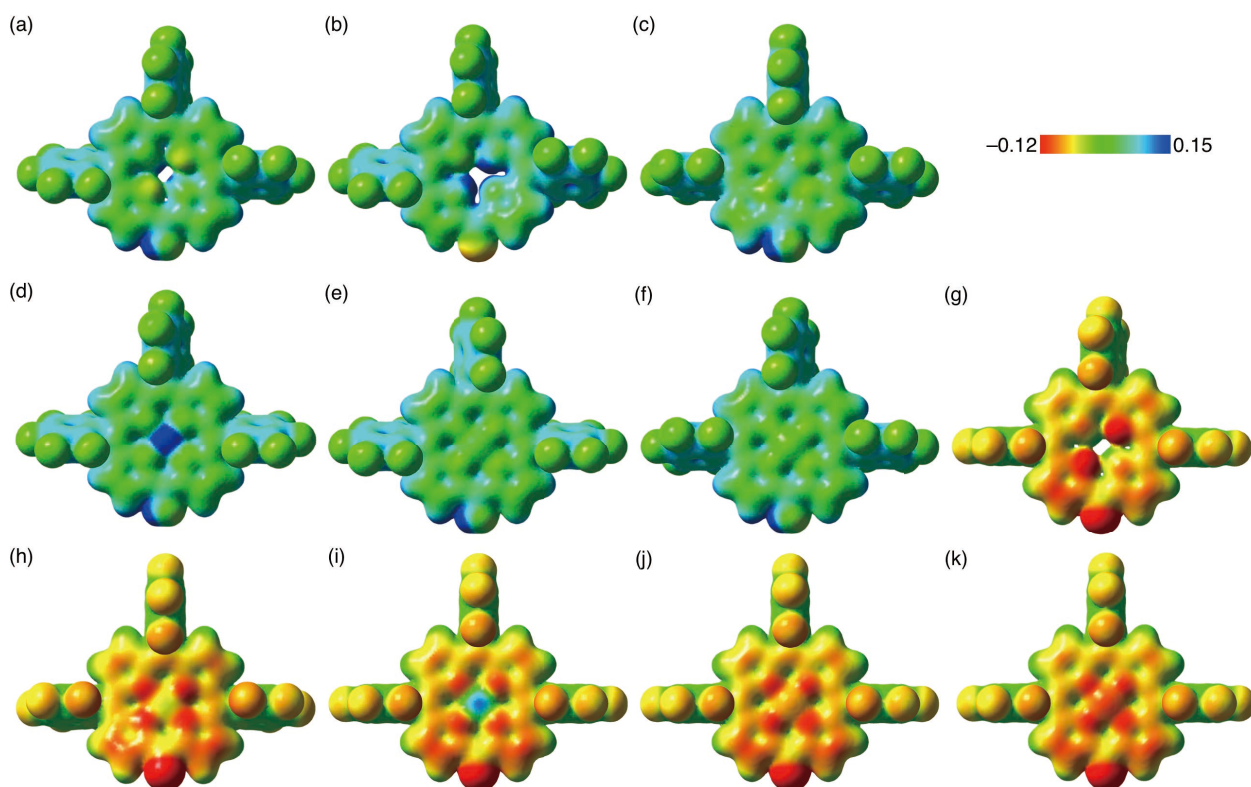

**Fig. S45** Electrostatic potential (ESP) mapping ( $\delta = 0.01$ ) of (a) **2-h-b**, (b) **2-o-a**, (c) **2ni**, (d) **2zn**, (e) **2pd**, (f) **2pt**, (g) **2-a** (h) **2ni<sup>-</sup>**, (i) **2zn<sup>-</sup>**, (j) **2pd<sup>-</sup>**, and (k) **2pt<sup>-</sup>** at B3LYP/6-31+G(d,p) for C, H, N, O, and F and B3LYP/LanL2DZ for Ni, Zn, Pd, and Pt. The ESP mappings of the  $\pi$ -electronic anions indicated the delocalization of negative charge of the anionic oxygen into porphyrin frameworks. Furthermore, even with the introduction of three  $C_6F_5$  groups as electron-withdrawing substituents, the porphyrin cores of the  $\pi$ -electronic anions have the negative charge comparable to the core of the tetraphenylporphyrin derivative (free base) bearing sulfonate units at the two *meso*-phenyl 4-positions.

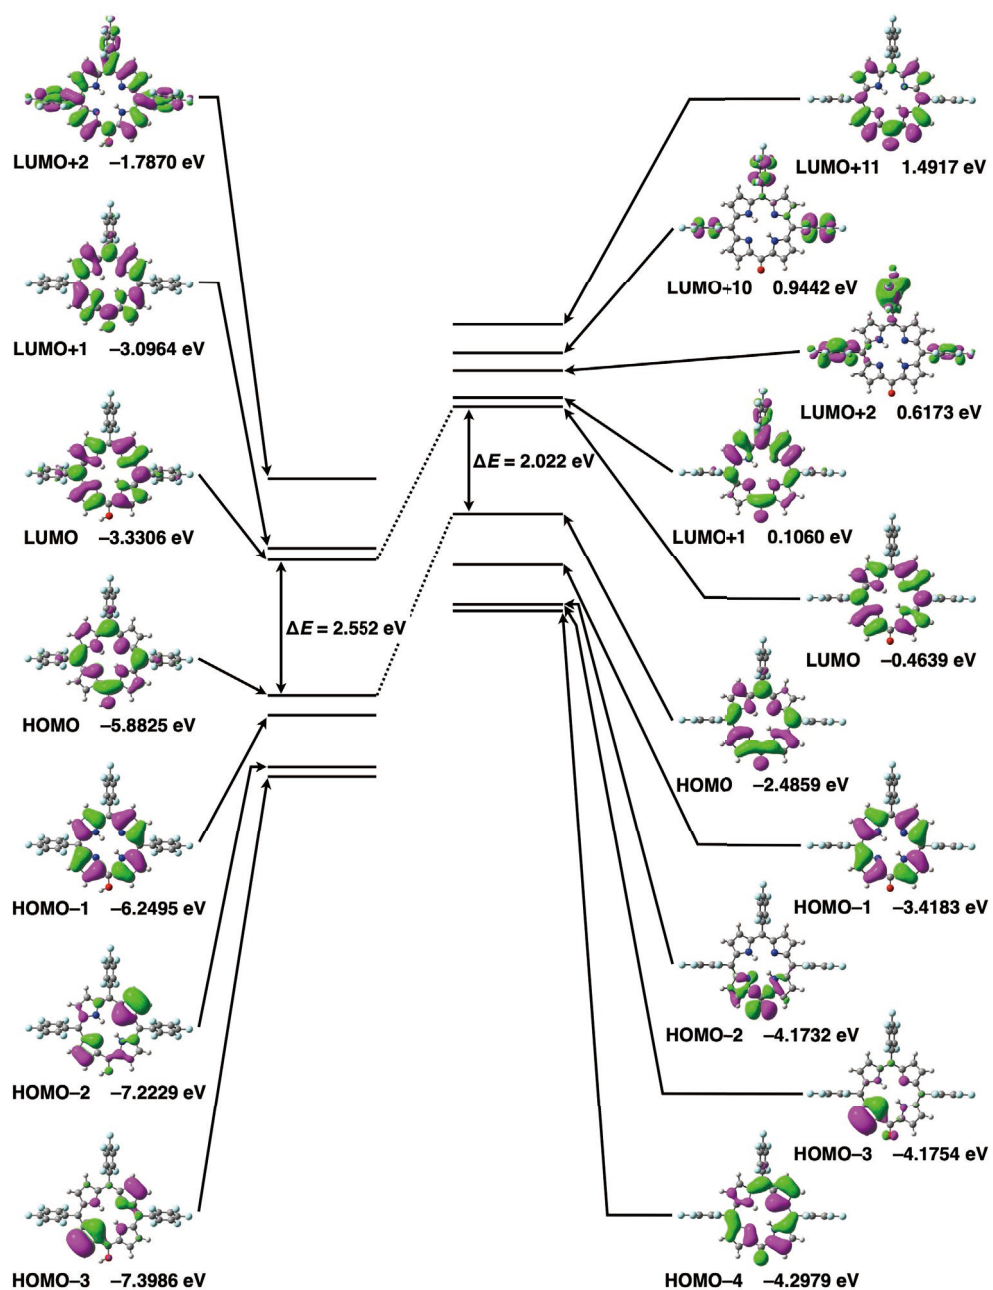

Fig. S46 Molecular orbitals (HOMO/LUMO) of **2-h-b** (left) and **2-a** (right) estimated at B3LYP/6-31+G(d,p).

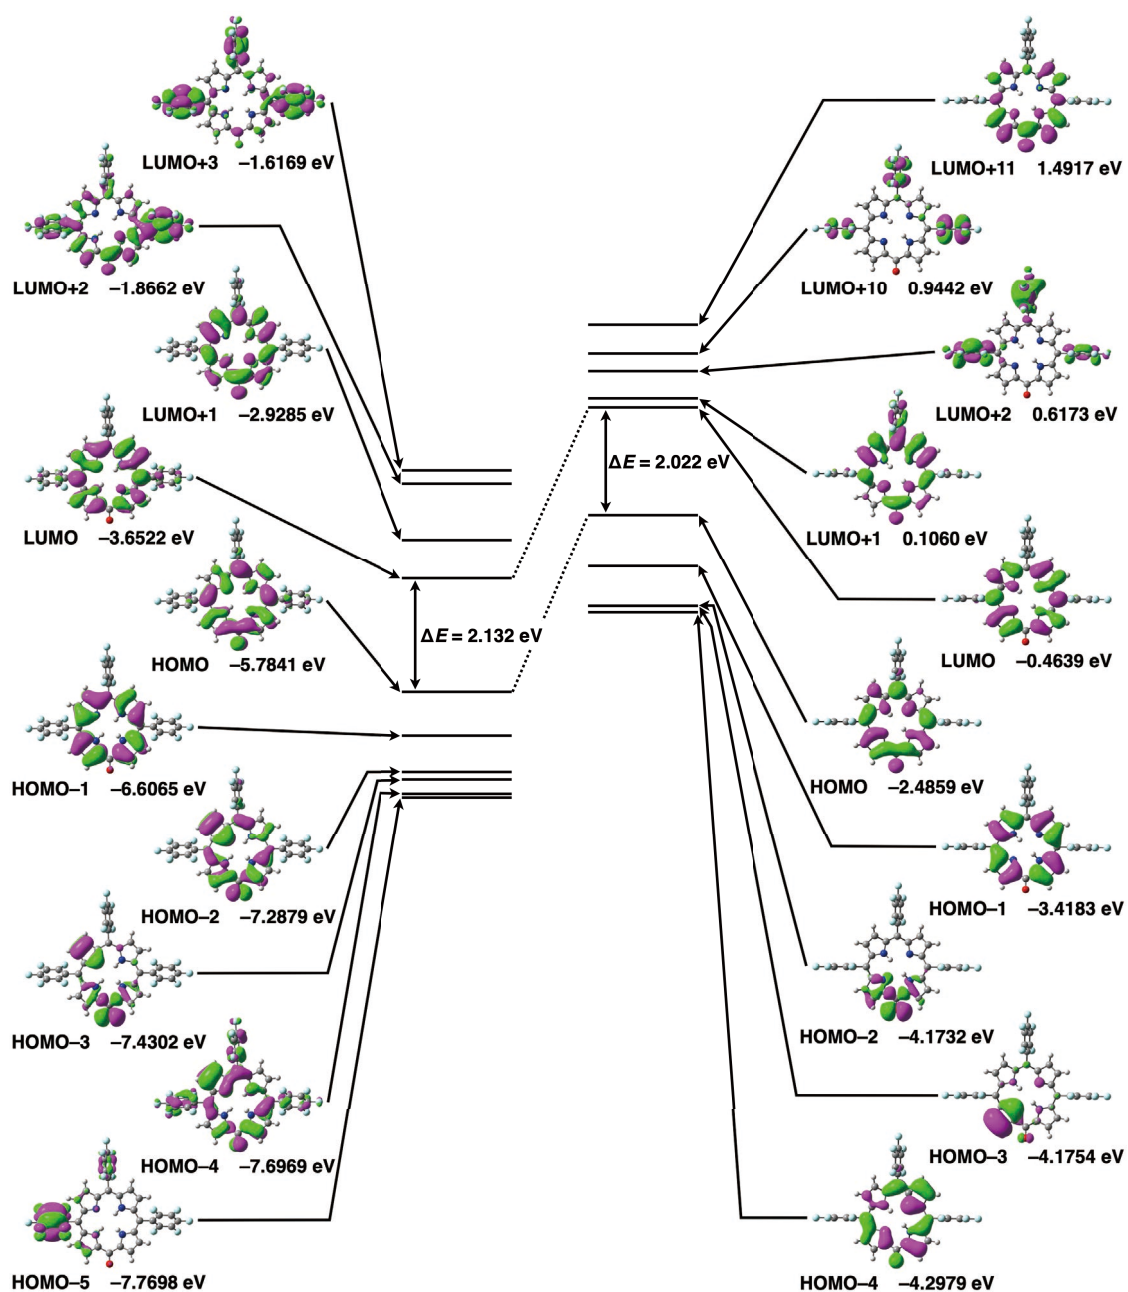

**Fig. S47** Molecular orbitals (HOMO/LUMO) of **2-o-a** (left) and **2-a** (right) (Fig. S46 right) estimated at B3LYP/6-31+G(d,p).

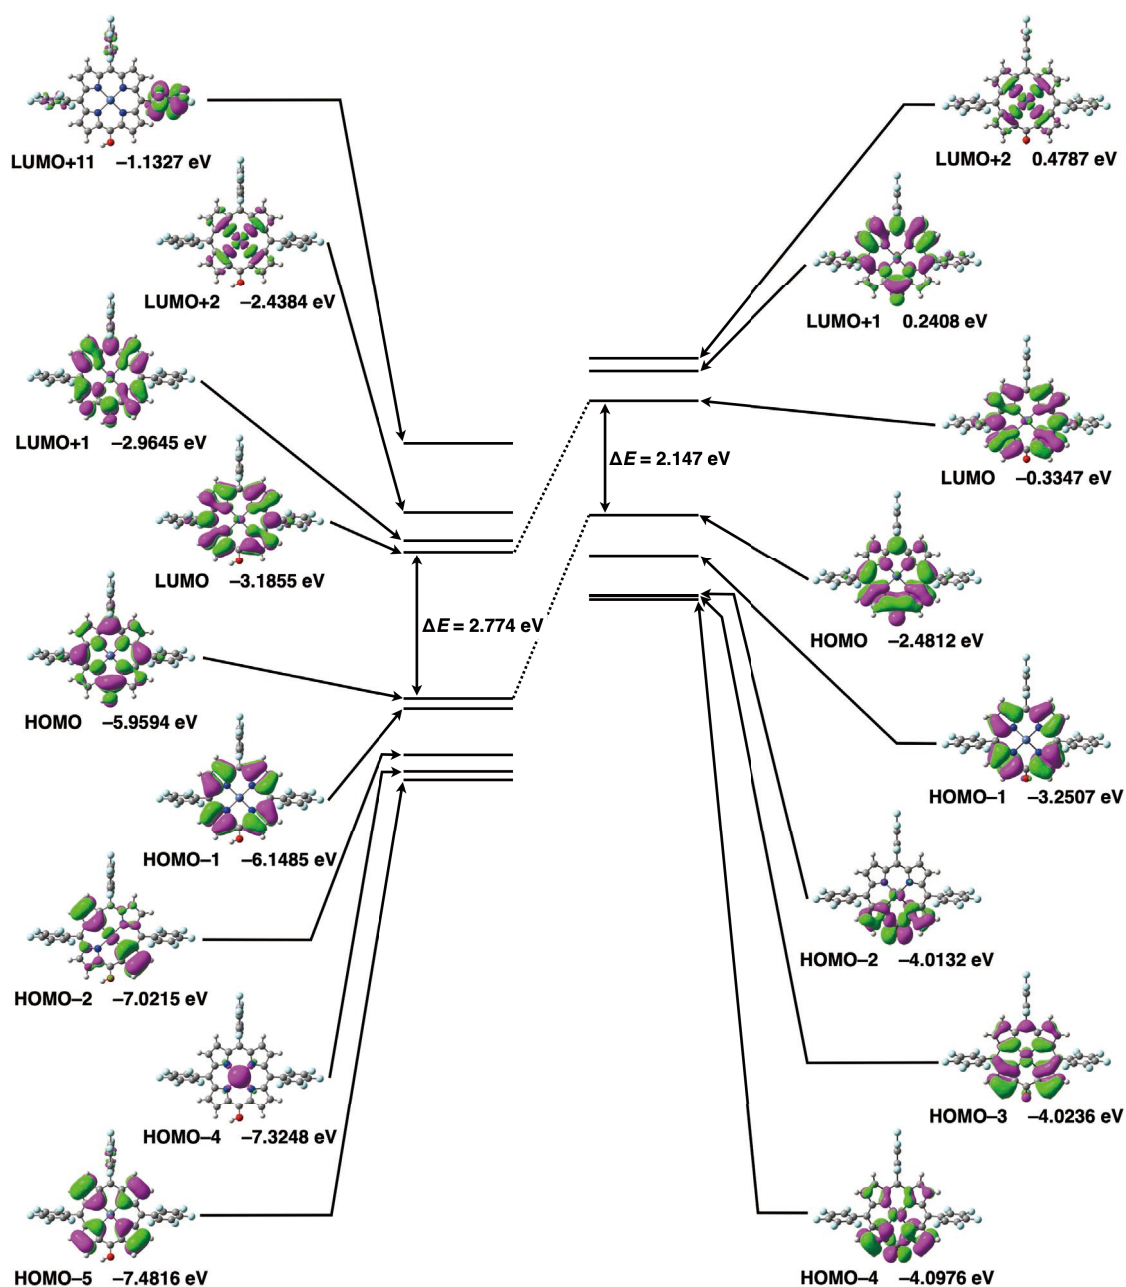

**Fig. S48** Molecular orbitals (HOMO/LUMO) of **2ni** (left) and **2ni<sup>-</sup>** (right) estimated at B3LYP/6-31+G(d,p) for C, H, N, O, and F and B3LYP/LanL2DZ for Ni.

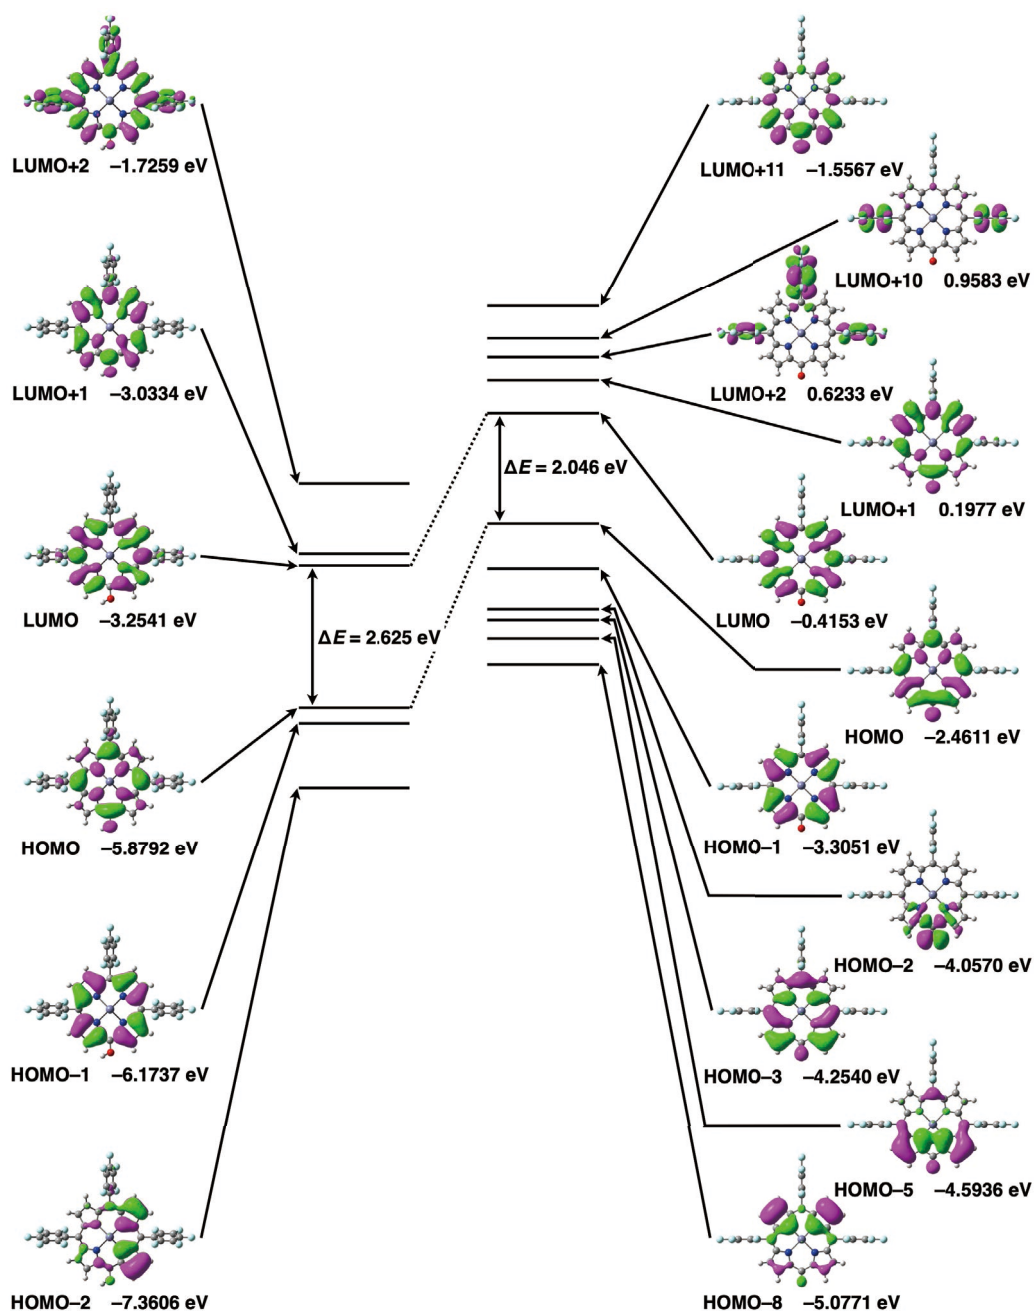

**Fig. S49** Molecular orbitals (HOMO/LUMO) of **2zn** (left) and **2zn<sup>-</sup>** (right) estimated at B3LYP/6-31+G(d,p) for C, H, N, O, and F and B3LYP/LanL2DZ for Zn.



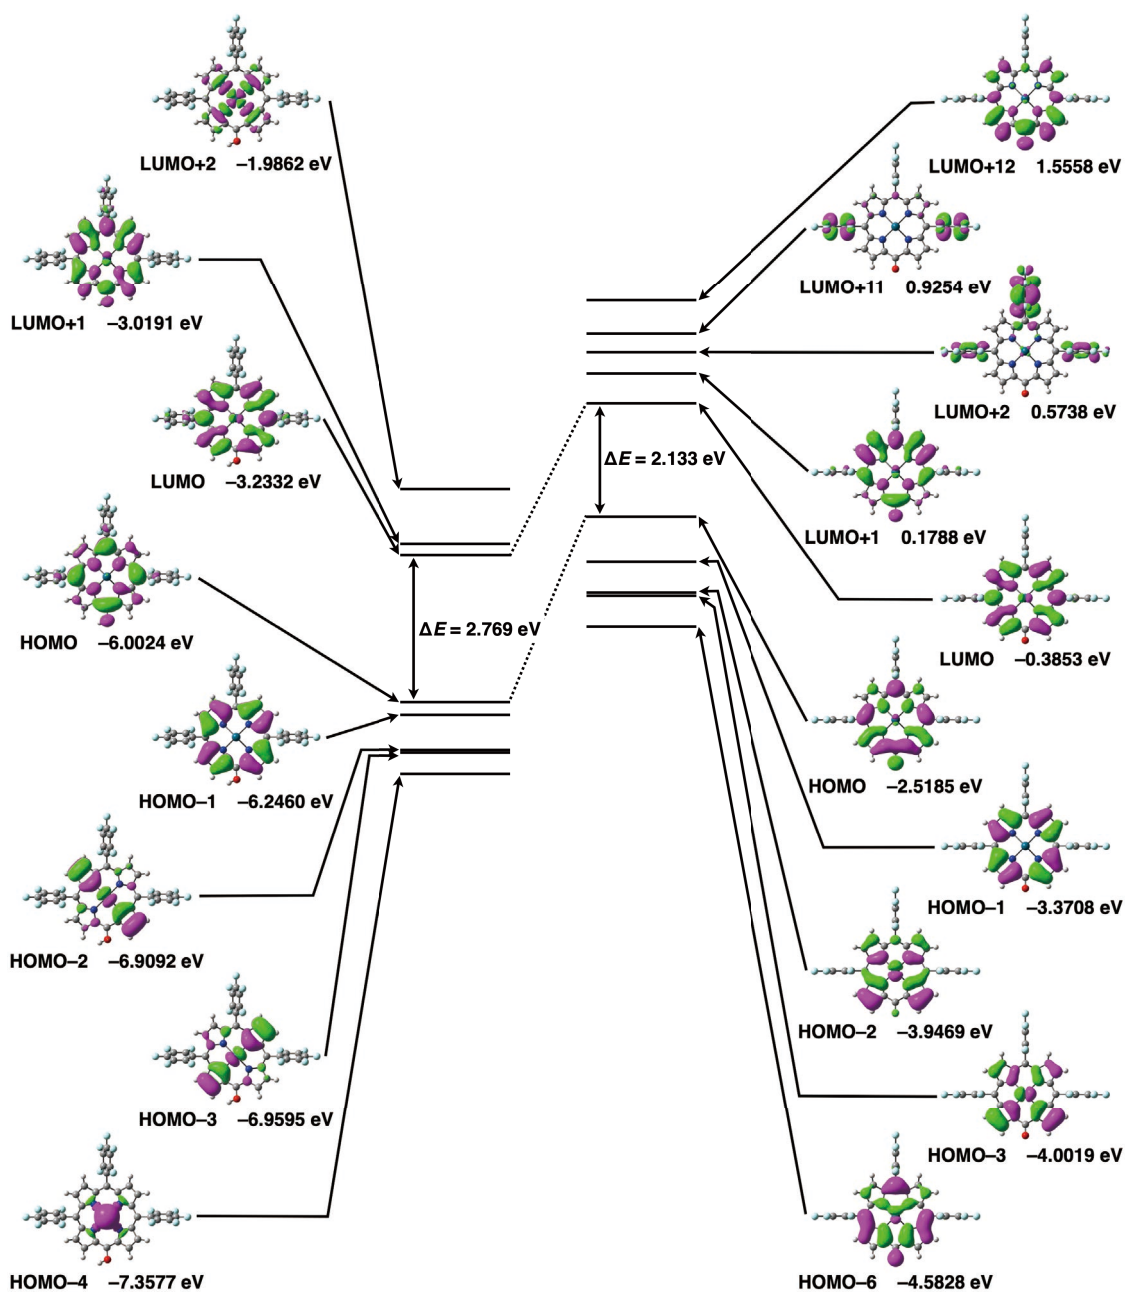

**Fig. S50** Molecular orbitals (HOMO/LUMO) of **2pd** (left) and **2pd<sup>-</sup>** (right) estimated at B3LYP/6-31+G(d,p) for C, H, N, O, and F and B3LYP/LanL2DZ for Pd.

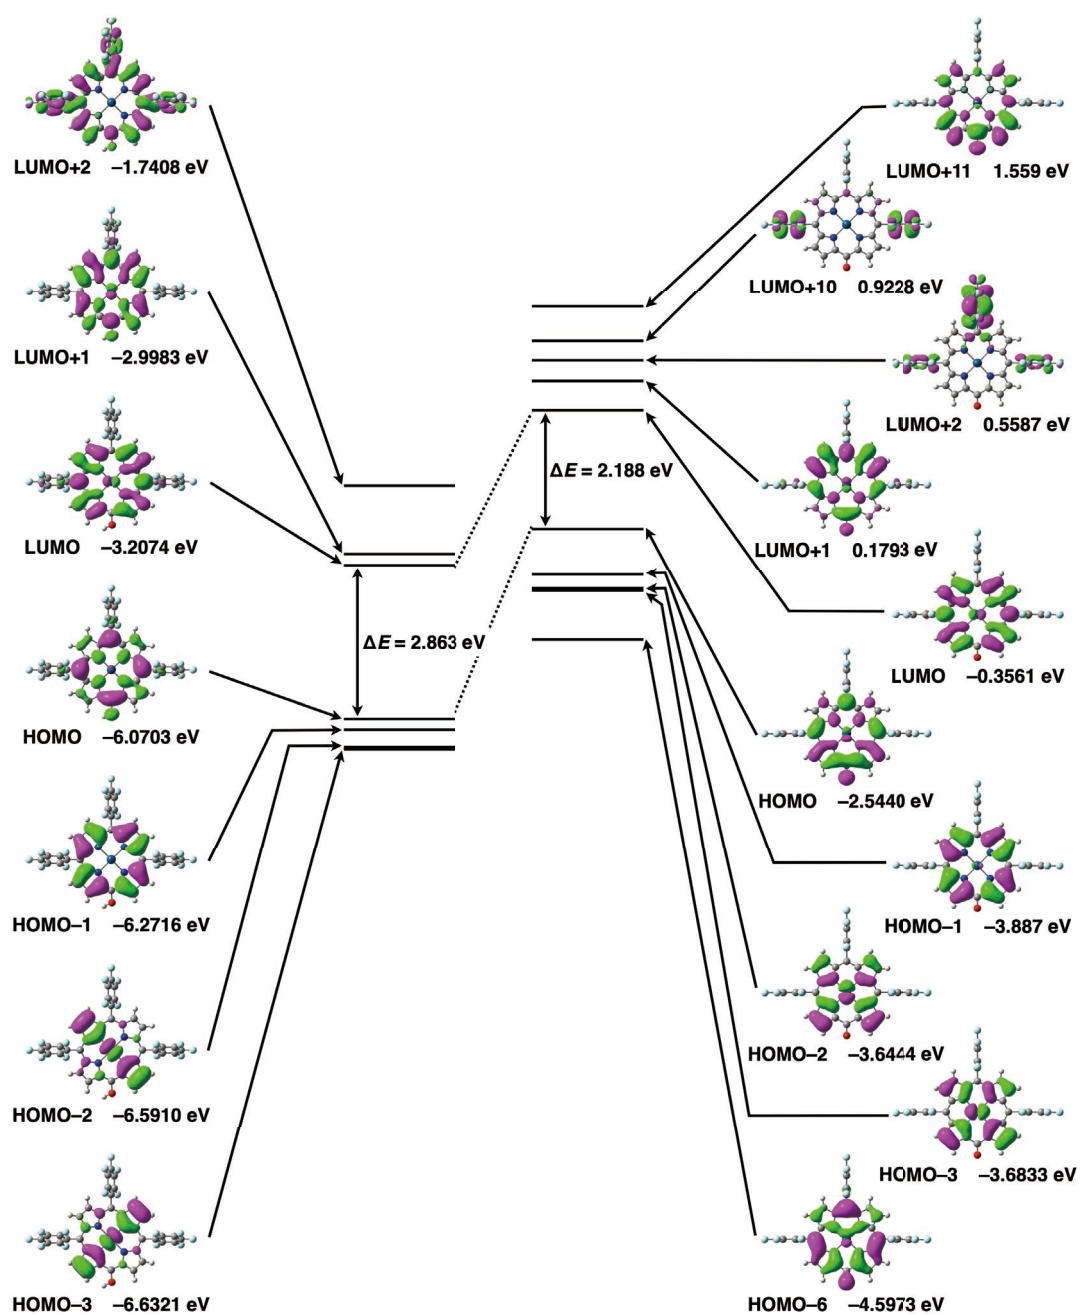

**Fig. S51** Molecular orbitals (HOMO/LUMO) of **2pt** (left) and **2pt<sup>-</sup>** (right) estimated at B3LYP/6-31+G(d,p) for C, H, N, O, and F and B3LYP/LanL2DZ for Pt.

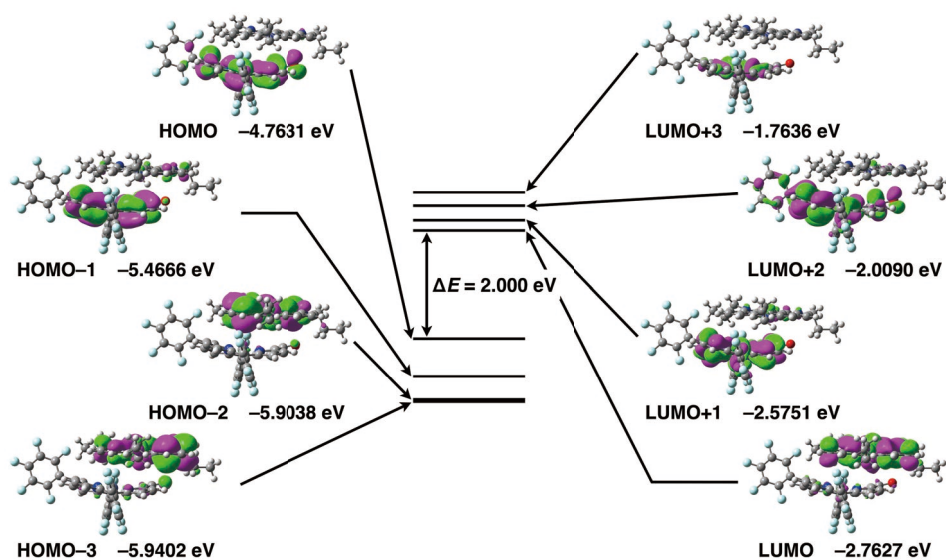

**Fig. S52** Molecular orbital (HOMO/LUMO) of **2ni**<sup>-</sup>-TATA<sup>+</sup> estimated at B3LYP/6-31+G(d,p) for C, H, N, O, and F and B3LYP/LanL2DZ for Ni.

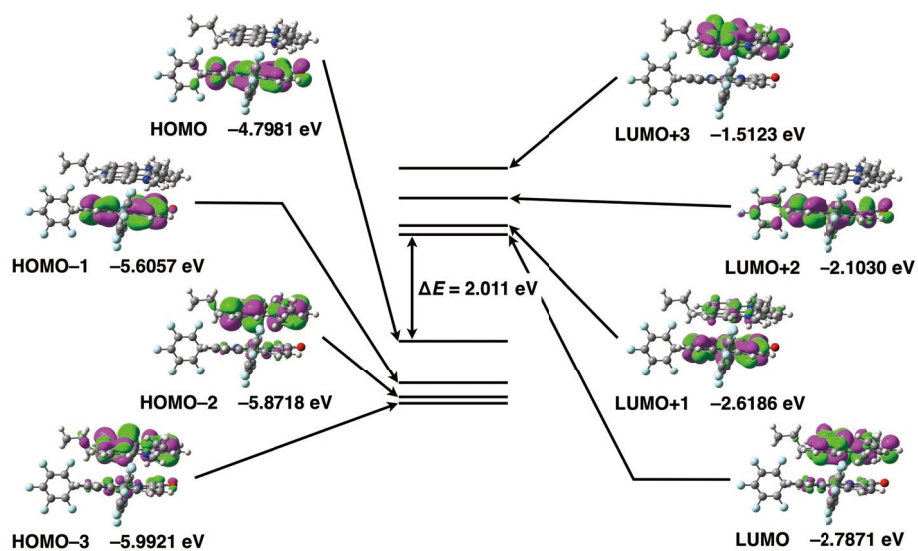

**Fig. S53** Molecular orbital (HOMO/LUMO) of **2pd**<sup>-</sup>-TATA<sup>+</sup> estimated at B3LYP/6-31+G(d,p) for C, H, N, O, and F and B3LYP/LanL2DZ for Pd.



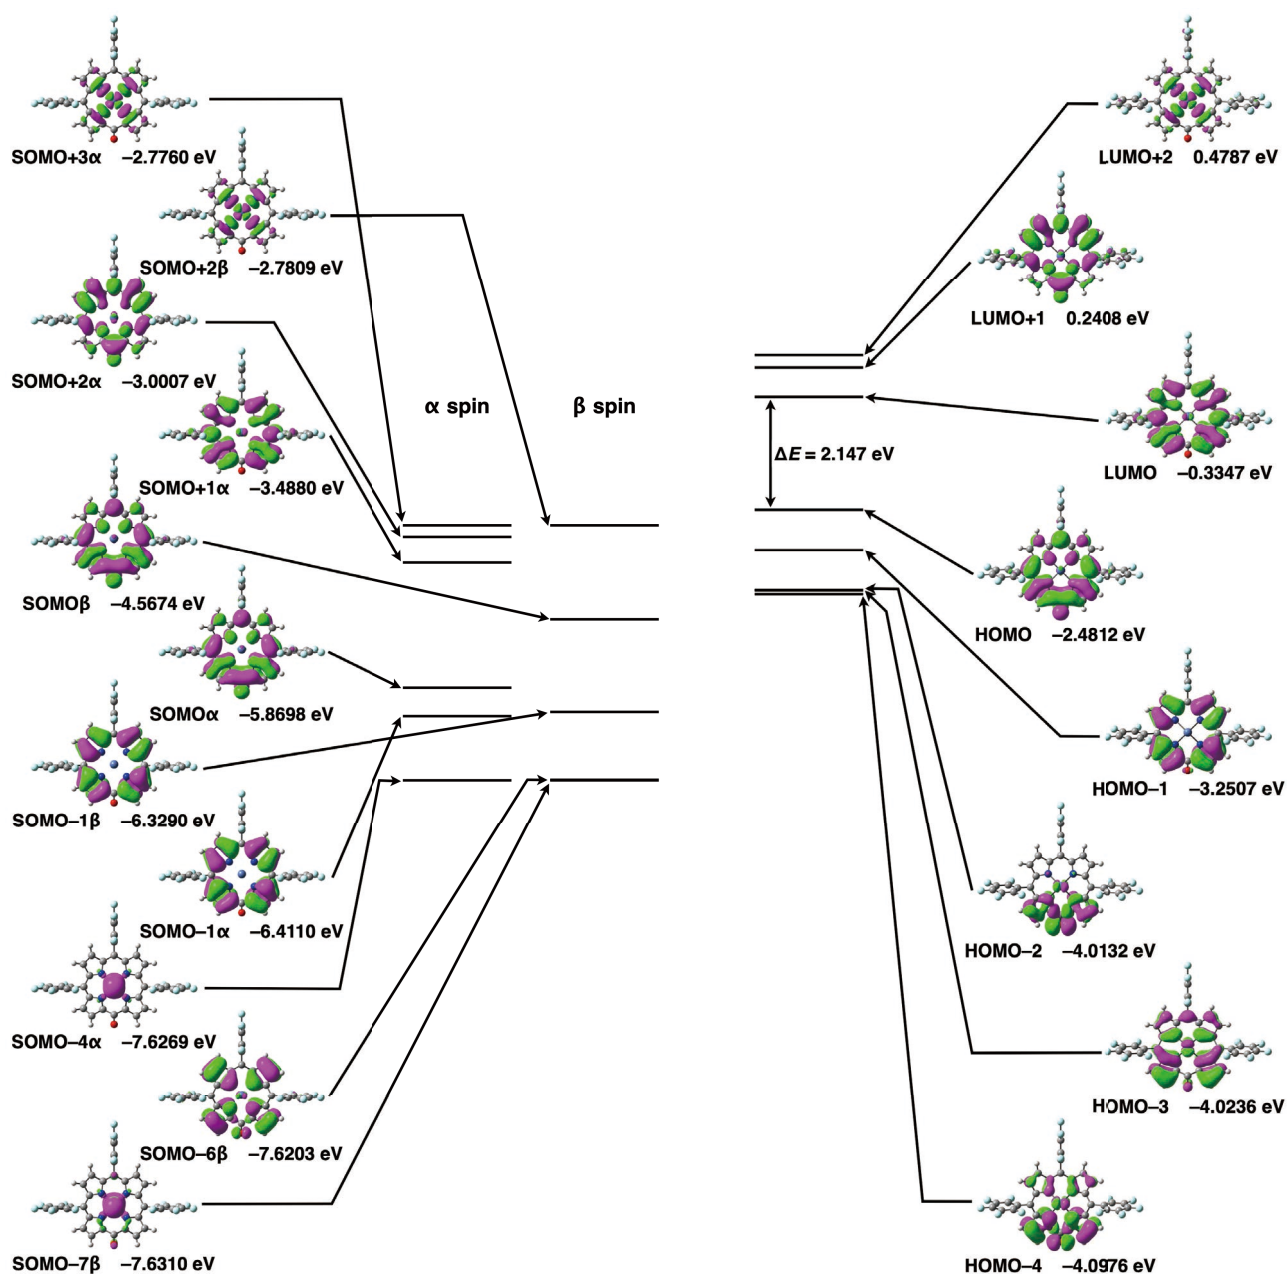

**Fig. S54** Molecular orbitals (HOMO/LUMO) of  $2\text{ni}$  radical as the one-electron-oxidized state of  $2\text{ni}^\cdot$  (left) at estimated at UB3LYP/6-31+G(d,p) for C, H, N, O, and F and UB3LYP/LanL2DZ for Ni and  $2\text{ni}^+$  (right) (Fig. S48 right) estimated at B3LYP/6-31+G(d,p) for C, H, N, O, and F and B3LYP/LanL2DZ for Ni.

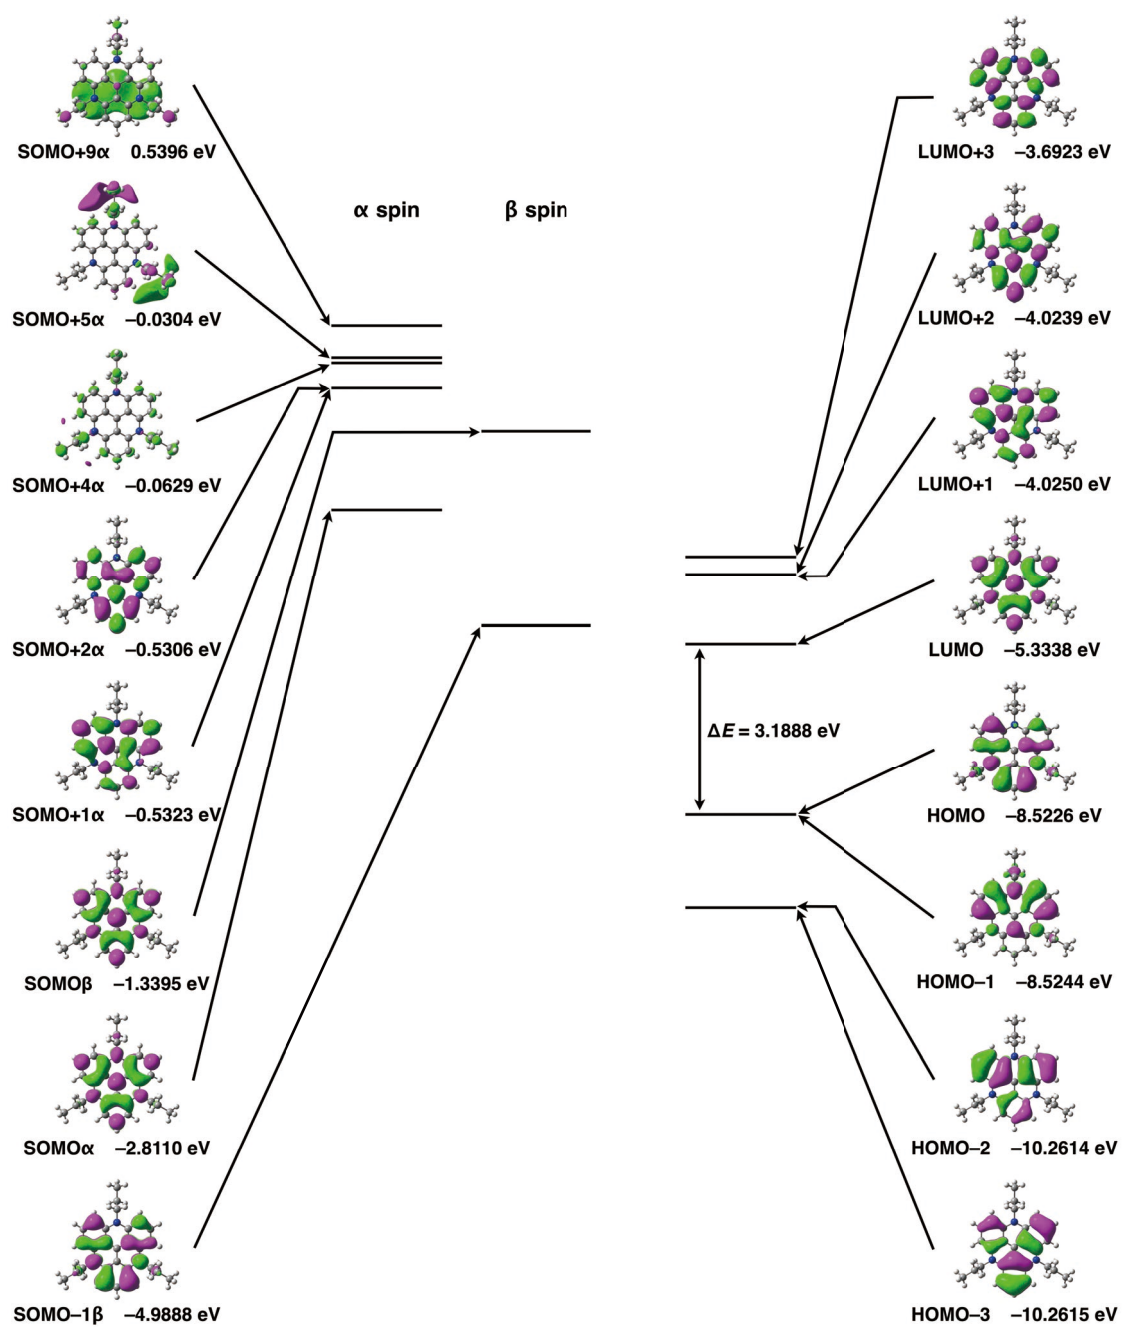

**Fig. S55** Molecular orbitals (HOMO/LUMO) of TATA radical (left) estimated at UB3LYP/6-31+G(d,p) and TATA<sup>+</sup> (right) estimated at B3LYP/6-31+G(d,p).

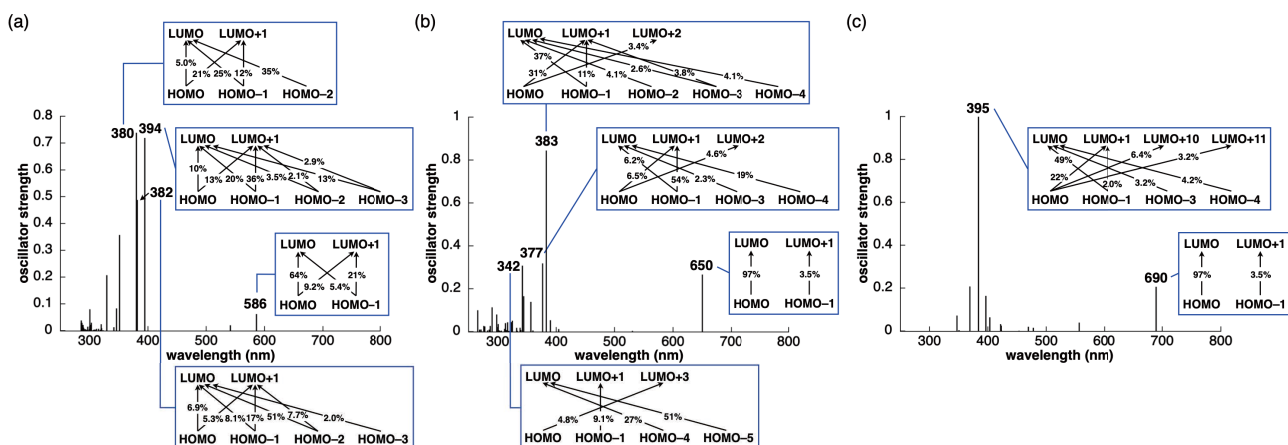

**Fig. S56** TD-DFT-based UV/vis absorption stick spectra of (a) **2-h-b**, (b) **2-o-a**, and (c) **2--a** with the transitions correlated with molecular orbitals estimated at B3LYP/6-31+G(d,p). These theoretical results were consistent with the observed spectra (Fig. S8).

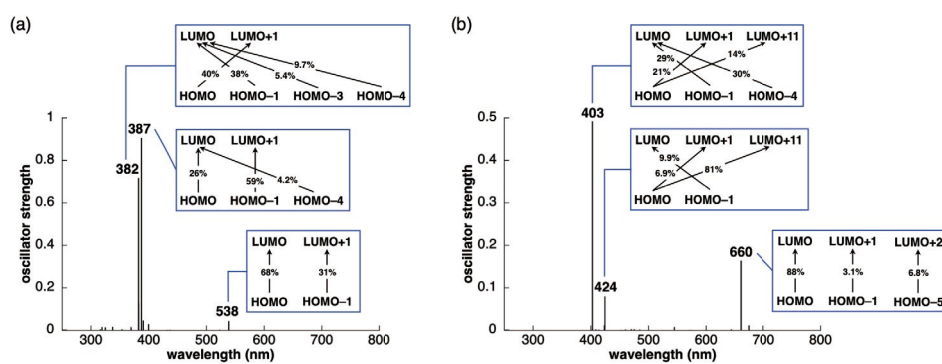

**Fig. S57** TD-DFT-based UV/vis absorption stick spectra of (a) **2ni** and (b) **2ni-** with the transitions correlated with molecular orbitals estimated at B3LYP/6-31+G(d,p) for C, H, N, O, and F and B3LYP/LanL2DZ for Ni. These theoretical results were consistent with the observed spectra (Fig. S8).

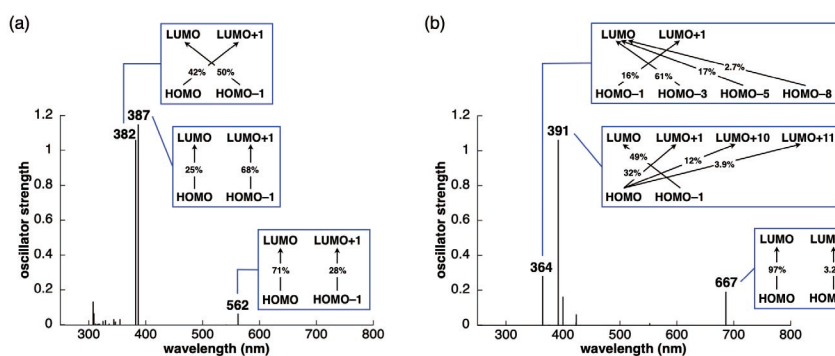

**Fig. S58** TD-DFT-based UV/vis absorption stick spectra of (a) **2zn** and (b) **2zn-** with the transitions correlated with molecular orbitals estimated at B3LYP/6-31+G(d,p) for C, H, N, O, and F and B3LYP/LanL2DZ for Zn. These theoretical results were consistent with the observed spectra (Fig. S8).

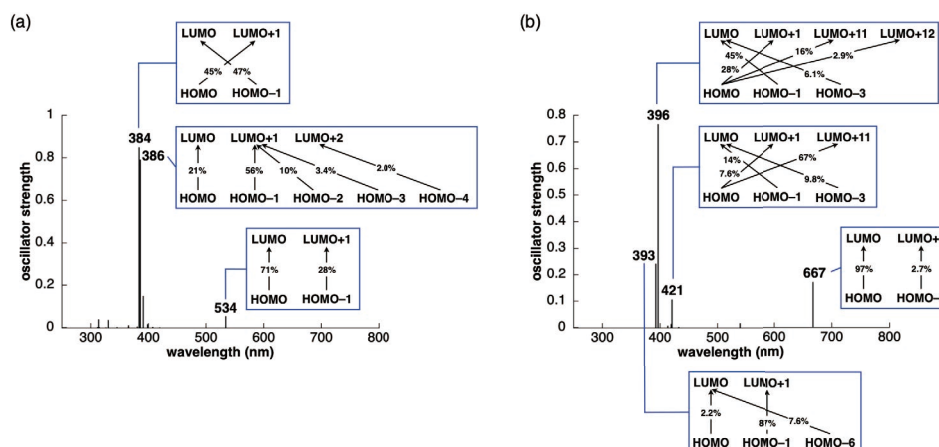

**Fig. S59** TD-DFT-based UV/vis absorption stick spectra of (a) **2pd** and (b) **2pd<sup>-</sup>** with the transitions correlated with molecular orbitals estimated at B3LYP/6-31+G(d,p) for C, H, N, O, and F and B3LYP/LanL2DZ for Pd. These theoretical results were consistent with the observed spectra (Fig. S8).

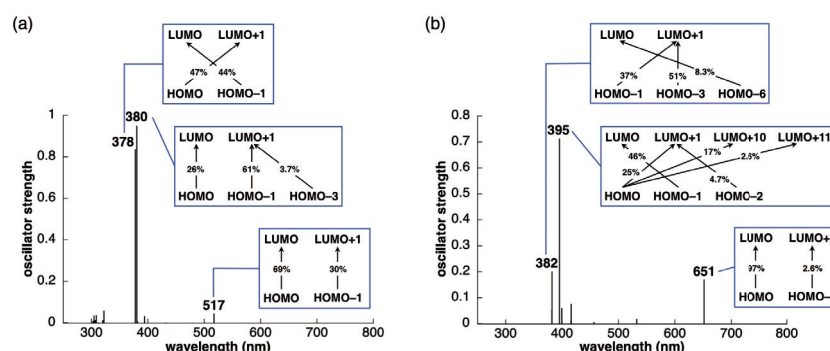

**Fig. S60** TD-DFT-based UV/vis absorption stick spectra of (a) **2pt** and (b) **2pt<sup>-</sup>** with the transitions correlated with molecular orbitals estimated at B3LYP/6-31+G(d,p) for C, H, N, O, and F and B3LYP/LanL2DZ for Pt. These theoretical results were consistent with the observed spectra (Fig. S8).

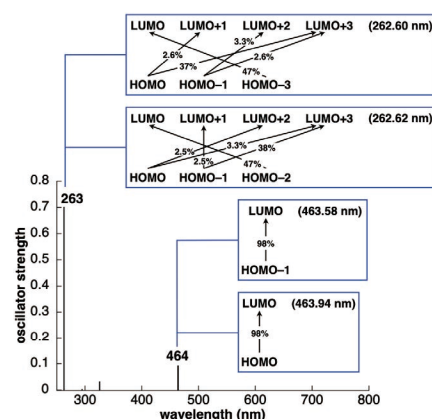

**Fig. S61** TD-DFT-based UV/vis absorption stick spectra of **TATA<sup>+</sup>** with the transitions correlated with molecular orbitals estimated at B3LYP/6-31+G(d,p).

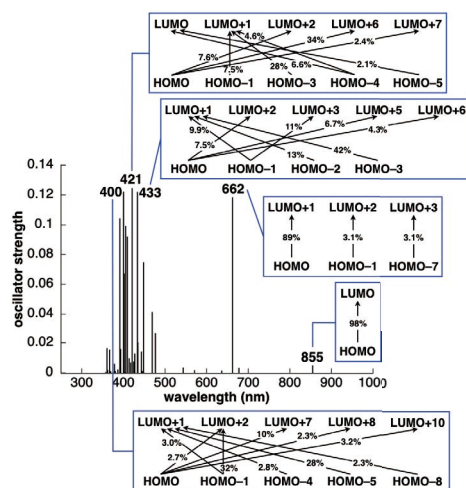

**Fig. S62** TD-DFT-based UV/vis absorption stick spectra of  $2\text{ni}^-$ -TATA $^+$  with the transitions correlated with molecular orbitals estimated at B3LYP-GD3BJ/6-31+G(d,p) for C, H, N, O, and F and B3LYP-GD3BJ/LanL2DZ for Ni. The estimated excitation at 855 nm includes the transition from HOMO, localized at the negative charged core of  $2\text{ni}^-$ , to LUMO, localized at the positive charged core of TATA $^+$  (Fig. S52). This result suggests the charge transfer from  $2\text{ni}^-$  to TATA $^+$ , which was not observed by UV/vis absorption spectrum (Fig. S93).

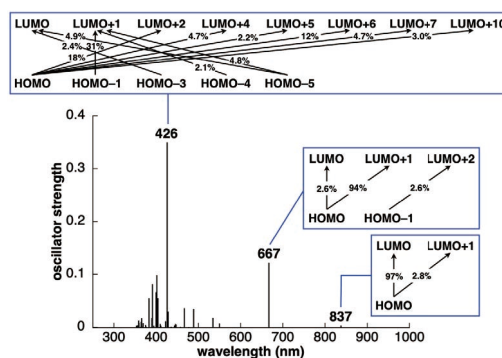

**Fig. S63** TD-DFT-based UV/vis absorption stick spectra of  $2\text{pd}^-$ -TATA $^+$  with the transitions correlated with molecular orbitals estimated at B3LYP-GD3BJ/6-31+G(d,p) for C, H, N, O, and F and B3LYP-GD3BJ/LanL2DZ for Pd. The estimated excitation at 837 nm includes the major transition from HOMO, localized at the negative charged core of  $2\text{pd}^-$ , to LUMO, localized at the positive charged core of TATA $^+$  (Fig. S53). This result suggests the charge transfer from  $2\text{pd}^-$  to TATA $^+$ , which was not observed by UV/vis absorption spectrum (Fig. S94).

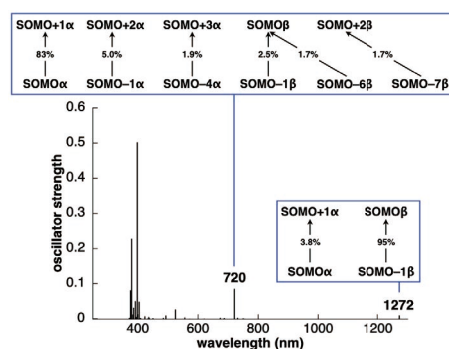

**Fig. S64** TD-DFT-based UV/vis absorption stick spectra of  $2\text{ni}$  radical with the transitions correlated with molecular orbitals estimated at UB3LYP/6-31+G(d,p) for C, H, N, O, and F and UB3LYP/LanL2DZ for Ni. In spectroelectrochemical analysis of  $2\text{ni}$ -TBA $^+$ , the broad peak at 795 nm in the oxidation states can be assigned as a component of  $2\text{ni}$  radical (Fig. S105a): the theoretically estimated excitation at 720 nm includes the major transition from SOMO $\alpha$  to SOMO+1 $\alpha$ , both of which are localized at the core  $\pi$ -system (Fig. S54).



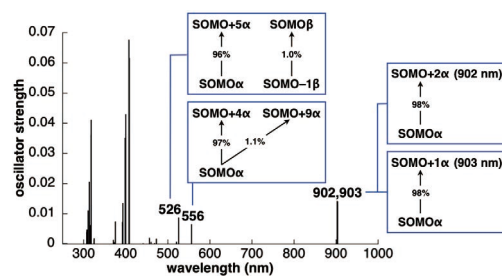

**Fig. S65** TD-DFT-based UV/vis absorption stick spectra of TATA radical with the transitions correlated with molecular orbitals estimated at UB3LYP/6-31+G(d,p). In spectroelectrochemical analysis of TATA<sup>+</sup>-Cl<sup>-</sup> (Fig. S106), the broad peak at 960 nm in the reduction states can be assigned as a component of TATA radical: the theoretically estimated excitations at 902 and 903 nm include the respective major transitions from SOMO $\alpha$  and SOMO $\alpha$  to SOMO+2 $\alpha$  and SOMO+1 $\alpha$ , respectively, all of which are localized at the core  $\pi$ -system (Fig. S55).

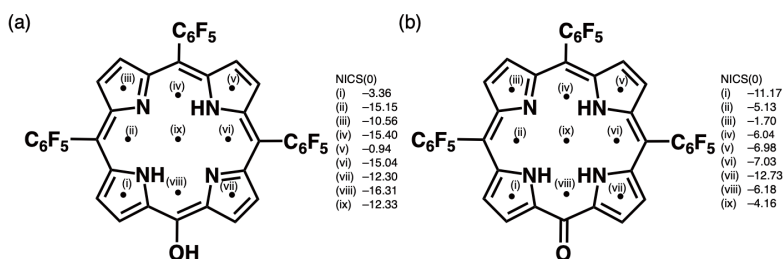

**Fig. S66** NICS values (ppm) of (a) **2-h-b** and (b) **2-o-a** calculated at B3LYP/6-31+G(d,p).

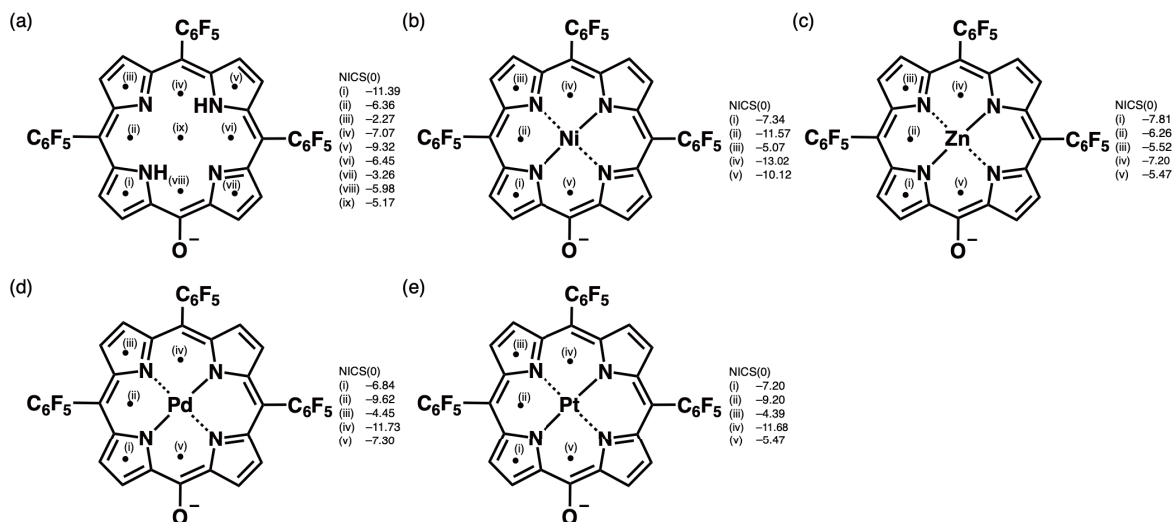

**Fig. S67** NICS values (ppm) of (a) **2**<sup>-</sup>, (b) **2Ni**<sup>-</sup>, (c) **2Zn**<sup>-</sup>, (d) **2Pd**<sup>-</sup>, and (e) **2Pt**<sup>-</sup> calculated at B3LYP/6-31+G(d,p) for C, H, N, O, and F and B3LYP/LanL2DZ for Ni, Zn, Pd, and Pt.

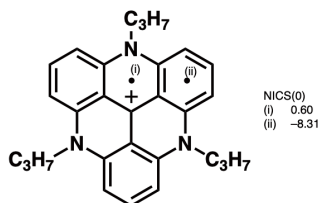

**Fig. S68** NICS values (ppm) of TATA<sup>+</sup> calculated at B3LYP/6-31+G(d,p).

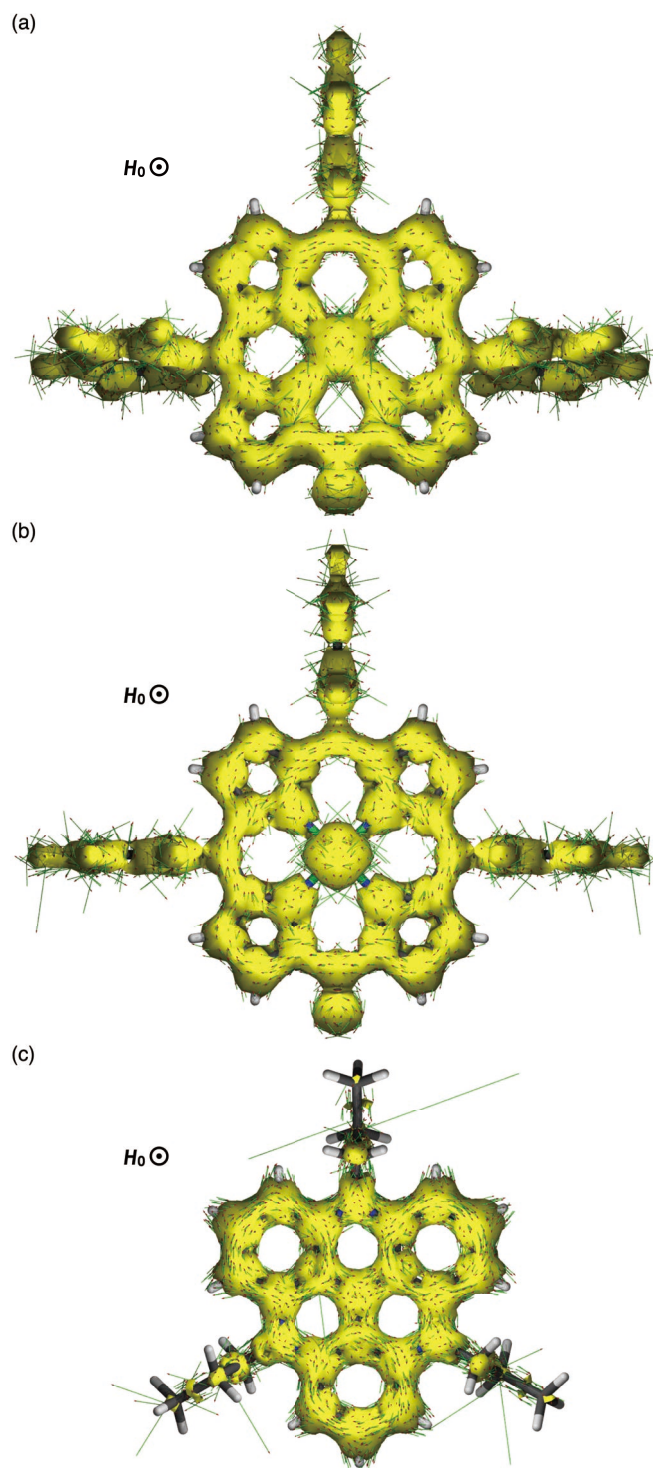

**Fig. S69** Anisotropy of the current induced density (ACID)<sup>[S14]</sup> of (a) **2ni**<sup>-</sup>, (b) **2pd**<sup>-</sup>, and (c) TATA<sup>+</sup> (top and side views) at isosurface value of  $\delta = 0.05$  based on the optimized structure at B3LYP/6-31+G(d,p) for C, H, N, O, and F and B3LYP/LanL2DZ for Ni and Pd. Current density vectors are plotted on to the ACID isosurface based on the vector of the magnetic field ( $H_0$ ) which is orthogonal with respect to the molecule. The plots for **2ni**<sup>-</sup> and **2pd**<sup>-</sup> suggest that the porphyrin cores of the deprotonated anions are aromatic, and the results are in good agreement with NICS values (Fig. S67). In the plot for TATA<sup>+</sup>, clockwise ring currents of the phenyl rings suggest their aromaticity, while the current of the N-containing six-membered rings show non-aromatic property, and the results are also in good agreement with NICS value (Fig. S68). These theoretical results were consistent with <sup>1</sup>H NMR spectra of **2ni**<sup>-</sup>-TATA<sup>+</sup> (Fig. S87) and **2pd**<sup>-</sup>-TATA<sup>+</sup> (Fig. S90).

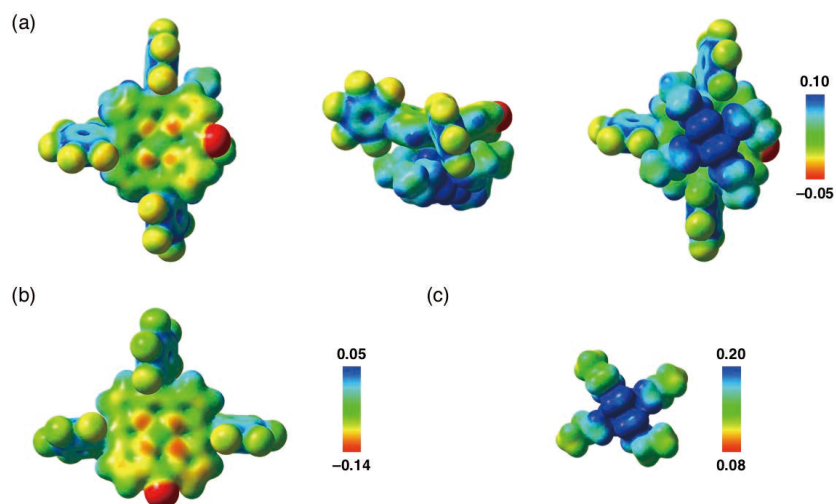

**Fig. S70** Electron density diagrams (top, side, and bottom views,  $\delta = 0.01$ ) of (a)  $2\text{Ni}^- \cdot \text{TBA}^+$ , (b)  $2\text{Ni}^-$ , and (c)  $\text{TBA}^+$  in the single-crystal X-ray structure<sup>[S5b]</sup> calculated at B3LYP/6-31+G(d,p) for C, H, N, O, and F and B3LYP/LanL2DZ for Ni.

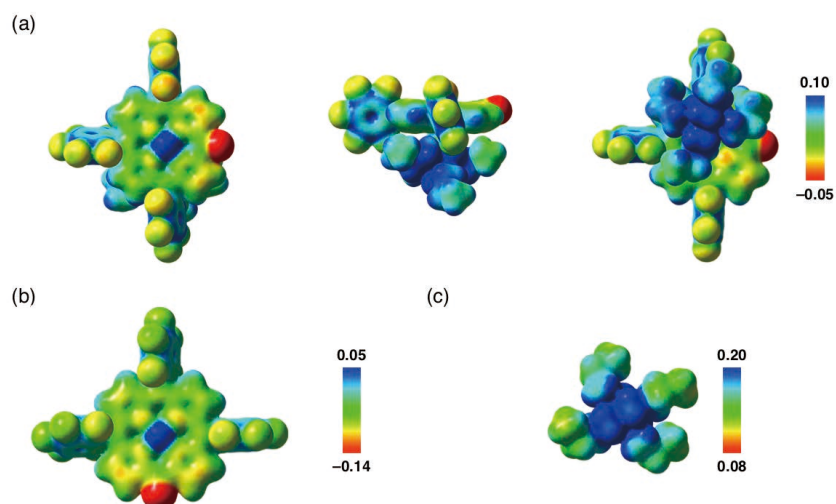

**Fig. S71** Electron density diagrams (top, side, and bottom views,  $\delta = 0.01$ ) of (a)  $2\text{Zn}^- \cdot \text{TBA}^+$ , (b)  $2\text{Zn}^-$ , and (c)  $\text{TBA}^+$  in the single-crystal X-ray structure (Fig. S20) calculated at B3LYP/6-31+G(d,p) for C, H, N, O, and F and B3LYP/LanL2DZ for Zn.

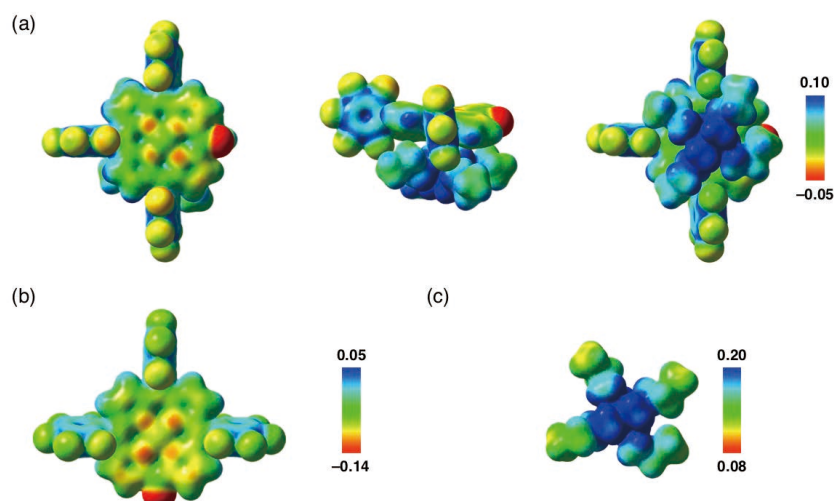

**Fig. S72** Electron density diagrams (top, side, and bottom views,  $\delta = 0.01$ ) of (a)  $2pd^-TBA^+$ , (b)  $2pd^-$ , and (c)  $TBA^+$  in the single-crystal X-ray structure (Fig. S22) calculated at B3LYP/6-31+G(d,p) for C, H, N, O, and F and B3LYP/LanL2DZ for Pd.

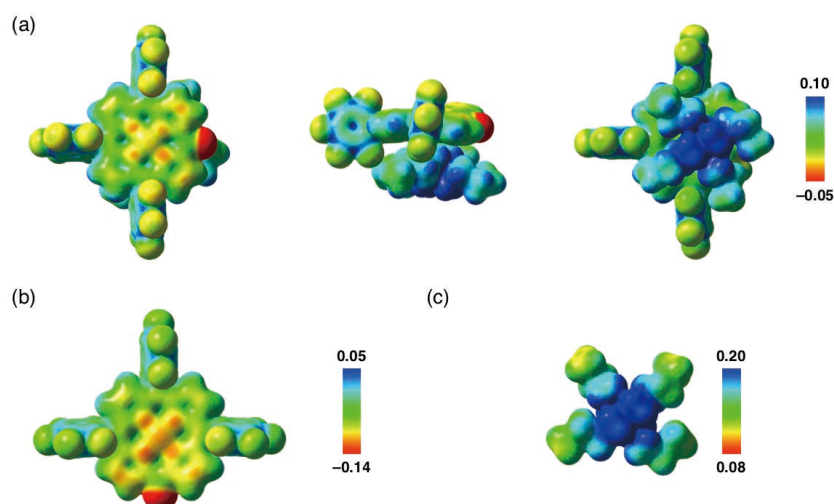

**Fig. S73** Electron density diagrams (top, side, and bottom views,  $\delta = 0.01$ ) of (a)  $2pt^-TBA^+$ , (b)  $2pt^-$ , and (c)  $TBA^+$  in the single-crystal X-ray structure (Fig. S24) calculated at B3LYP/6-31+G(d,p) for C, H, N, O, and F and B3LYP/LanL2DZ for Pt.

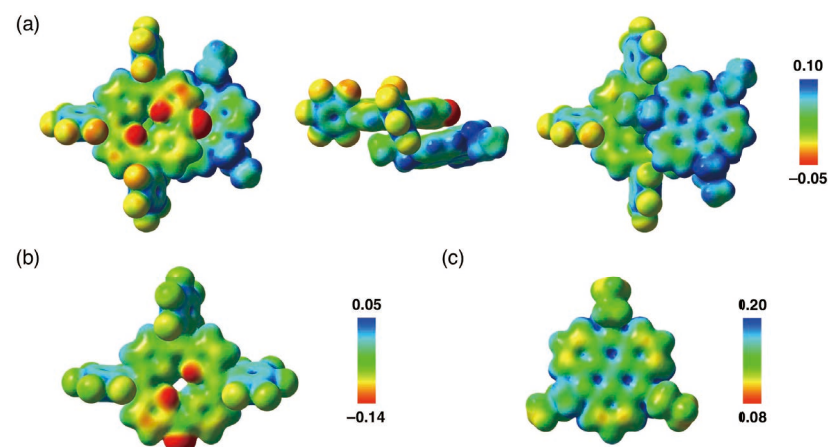

**Fig. S74** Electron density diagrams (top, side, and bottom views,  $\delta = 0.01$ ) of (a)  $2^-TATA^+$ , (b)  $2^-$ , and (c)  $TATA^+$  in the single-crystal X-ray structure (Fig. S26) calculated at B3LYP/6-31+G(d,p).

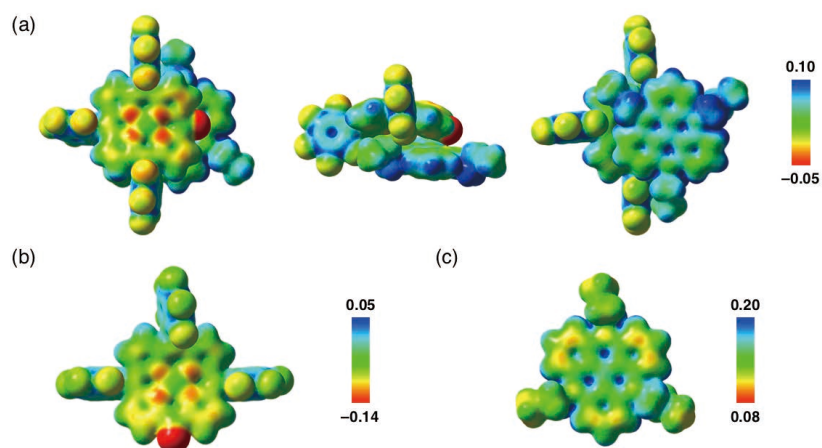

**Fig. S75** Electron density diagrams (top, side, and bottom views,  $\delta = 0.01$ ) of (a)  $2\text{Ni}^-$ -TATA $^+$ , (b)  $2\text{Ni}^-$ , and (c) TATA $^+$  in the single-crystal X-ray structure (Fig. S28) calculated at B3LYP/6-31+G(d,p) for C, H, N, O, and F and B3LYP/LanL2DZ for Ni.

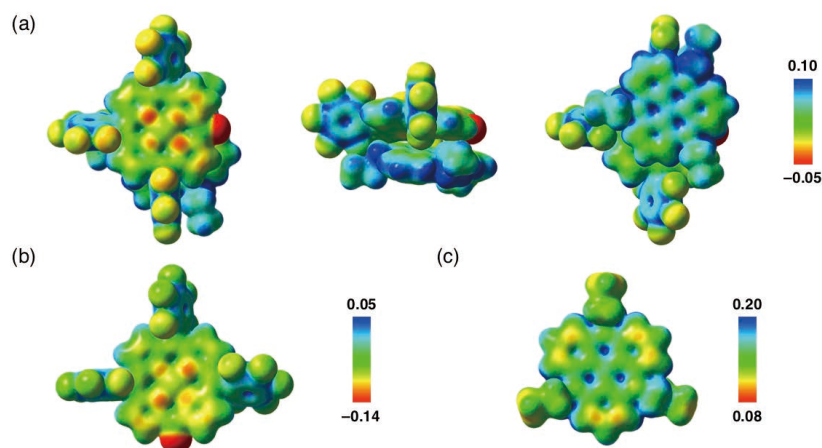

**Fig. S76** Electron density diagrams (top, side, and bottom views,  $\delta = 0.01$ ) of (a)  $2\text{Pd}^-$ -TATA $^+$ , (b)  $2\text{Pd}^-$ , and (c) TATA $^+$  in the single-crystal X-ray structure (Fig. S30) calculated at B3LYP/6-31+G(d,p) for C, H, N, O, and F and B3LYP/LanL2DZ for Pd.

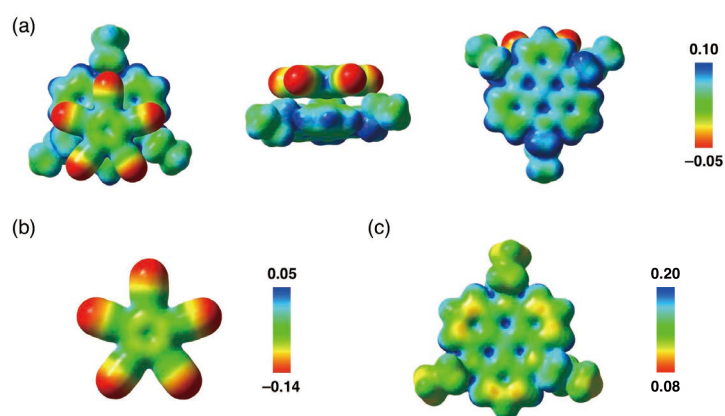

**Fig. S77** Electron density diagrams (top, side, and bottom views,  $\delta = 0.01$ ) of (a) TATA $^+$ -PCCp $^-$ , (b) PCCp $^-$ , and (c) TATA $^+$  in the single-crystal X-ray structure<sup>[S12]</sup> calculated at B3LYP/6-31+G(d,p).



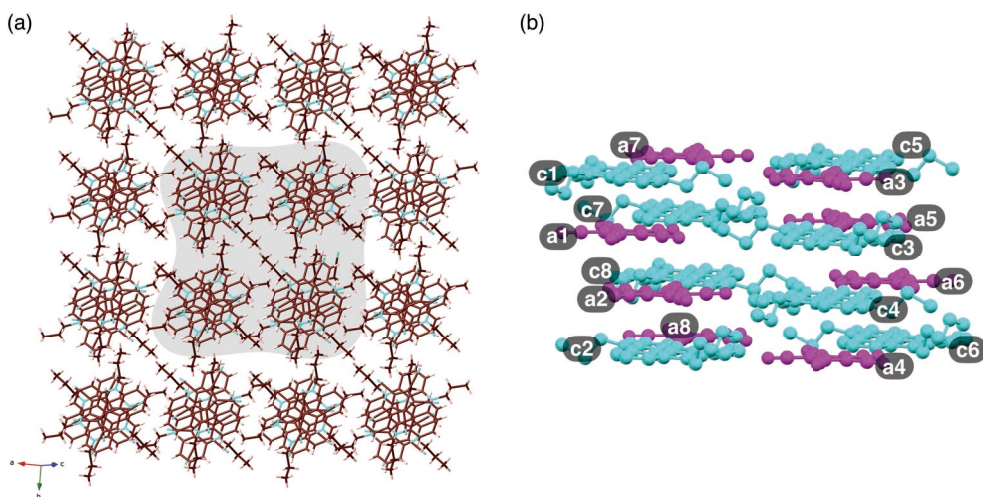

**Fig. S78** Single-crystal X-ray structure of PCCp<sup>−</sup>-TATA<sup>+</sup>[S12] for the energy decomposition analysis (EDA) calculation (Table S4): (a) top view of charge-by-charge structure and (b) side view of shaded part in (a). The labels (a1–8 and c1–8) correspond to the fragments shown in Table S4.  $E_{\text{tot}}$  of stacking ion pairs of PCCp<sup>−</sup>-TATA<sup>+</sup> were  $-138.8 - -141.3$  kcal/mol, which were larger than those of lateral positions ( $-34.4 - -63.2$  kcal/mol). Importantly,  $E_{\text{disp}}$  for the stacking ion pairs were  $-95.03 - -95.54$  kcal/mol, which were larger than those of lateral positions. Favorable contribution of  $E_{\text{disp}}$  for the stacking ion pairs indicated effective  $\pi-\pi$  interaction. It should be noticed that energetically unfavored  $E_{\text{es}}$  and favored  $E_{\text{disp}}$  were observed in the stacking structures of PCCp<sup>−</sup> ( $E_{\text{es}}/E_{\text{disp}}$  of  $43.18/-43.92$  and  $43.21/-43.92$  kcal/mol for two different structures a1/a2 and a5/a6, respectively) and TATA<sup>+</sup> ( $E_{\text{es}}/E_{\text{disp}}$  of  $35.12/-133.40$  and  $35.00/-133.40$  kcal/mol for two different structures c3/c4 and c7/c8, respectively). The stacking structures of PCCp<sup>−</sup> are less stable than those of TATA<sup>+</sup>. Atom color code in (a): brown, pink, and cyan refer to carbon, hydrogen, and nitrogen, respectively. Color code in (b): magenta and cyan refer to anion and cation parts, respectively.

**Table S4** Energies between each fragment in PCCp<sup>-</sup>-TATA<sup>+</sup> (Fig. S78) estimated by EDA calculation<sup>[S15]</sup> based on an FMO2-MP2 using NOSeC-V-DZP with MCP.<sup>[S16-18]</sup>

| fragments | total interaction energy<br>(kcal/mol) | electrostatic interaction<br>energy ( $E_{es}$ )<br>(kcal/mol) | exchange repulsion in-<br>teraction energy ( $E_{ex}$ )<br>(kcal/mol) | charge-transfer interac-<br>tion energy ( $E_{ct+mix}$ )<br>(kcal/mol) | dispersion interaction<br>energy ( $E_{disp}$ )<br>(kcal/mol) |
|-----------|----------------------------------------|----------------------------------------------------------------|-----------------------------------------------------------------------|------------------------------------------------------------------------|---------------------------------------------------------------|
| c8-c1     | 30.756                                 | 30.756                                                         | 0.000                                                                 | 0.000                                                                  | 0.000                                                         |
| c5-c1     | 20.742                                 | 24.625                                                         | 0.903                                                                 | -0.313                                                                 | -4.473                                                        |
| c5-c8     | 25.965                                 | 25.965                                                         | 0.000                                                                 | 0.000                                                                  | 0.000                                                         |
| c4-c1     | 20.858                                 | 20.858                                                         | 0.000                                                                 | 0.000                                                                  | 0.000                                                         |
| c4-c8     | 21.541                                 | 21.541                                                         | 0.000                                                                 | 0.000                                                                  | 0.000                                                         |
| c4-c5     | 21.513                                 | 21.513                                                         | 0.000                                                                 | 0.000                                                                  | 0.000                                                         |
| c7-c1     | 6.872                                  | 34.317                                                         | 3.787                                                                 | -2.314                                                                 | -28.918                                                       |
| c7-c8     | -84.166                                | 35.005                                                         | 24.617                                                                | -10.387                                                                | -133.400                                                      |
| c7-c5     | 8.778                                  | 31.317                                                         | 2.388                                                                 | -1.493                                                                 | -23.435                                                       |
| c7-c4     | 18.554                                 | 18.554                                                         | 0.000                                                                 | 0.000                                                                  | 0.000                                                         |
| c2-c1     | 24.247                                 | 24.247                                                         | 0.000                                                                 | 0.000                                                                  | 0.000                                                         |
| c2-c8     | 20.533                                 | 29.801                                                         | 0.276                                                                 | -0.576                                                                 | -8.968                                                        |
| c2-c5     | 17.614                                 | 17.614                                                         | 0.000                                                                 | 0.000                                                                  | 0.000                                                         |
| c2-c4     | 8.787                                  | 31.329                                                         | 2.390                                                                 | -1.492                                                                 | -23.439                                                       |
| c2-c7     | 21.532                                 | 21.532                                                         | 0.000                                                                 | 0.000                                                                  | 0.000                                                         |
| c3-c1     | 20.105                                 | 25.387                                                         | 0.373                                                                 | -0.639                                                                 | -5.016                                                        |
| c3-c8     | 22.984                                 | 22.984                                                         | 0.000                                                                 | 0.000                                                                  | 0.000                                                         |
| c3-c5     | 20.453                                 | 29.747                                                         | 0.276                                                                 | -0.578                                                                 | -8.992                                                        |
| c3-c4     | -84.042                                | 35.117                                                         | 24.621                                                                | -10.385                                                                | -133.395                                                      |
| c3-c7     | 21.523                                 | 21.523                                                         | 0.000                                                                 | 0.000                                                                  | 0.000                                                         |
| c3-c2     | 25.988                                 | 25.988                                                         | 0.000                                                                 | 0.000                                                                  | 0.000                                                         |
| c6-c1     | 17.636                                 | 17.636                                                         | 0.000                                                                 | 0.000                                                                  | 0.000                                                         |
| c6-c8     | 20.076                                 | 25.334                                                         | 0.373                                                                 | -0.638                                                                 | -4.993                                                        |
| c6-c5     | 24.208                                 | 24.208                                                         | 0.000                                                                 | 0.000                                                                  | 0.000                                                         |
| c6-c4     | 6.822                                  | 34.282                                                         | 3.788                                                                 | -2.315                                                                 | -28.933                                                       |
| c6-c7     | 20.827                                 | 20.827                                                         | 0.000                                                                 | 0.000                                                                  | 0.000                                                         |
| c6-c2     | 20.747                                 | 24.632                                                         | 0.898                                                                 | -0.312                                                                 | -4.471                                                        |
| c6-c3     | 30.718                                 | 30.718                                                         | 0.000                                                                 | 0.000                                                                  | 0.000                                                         |
| a7-c1     | -63.153                                | -44.943                                                        | 2.667                                                                 | -2.551                                                                 | -18.326                                                       |
| a7-c8     | -34.050                                | -34.050                                                        | 0.000                                                                 | 0.000                                                                  | 0.000                                                         |
| a7-c5     | -55.531                                | -39.392                                                        | 1.389                                                                 | -2.003                                                                 | -15.525                                                       |
| a7-c4     | -16.791                                | -16.791                                                        | 0.000                                                                 | 0.000                                                                  | 0.000                                                         |
| a7-c7     | -141.336                               | -58.976                                                        | 21.672                                                                | -8.490                                                                 | -95.541                                                       |
| a7-c2     | -18.536                                | -18.536                                                        | 0.000                                                                 | 0.000                                                                  | 0.000                                                         |
| a7-c3     | -19.934                                | -19.934                                                        | 0.000                                                                 | 0.000                                                                  | 0.000                                                         |
| a7-c6     | -18.119                                | -18.119                                                        | 0.000                                                                 | 0.000                                                                  | 0.000                                                         |
| a2-c1     | -32.155                                | -32.155                                                        | 0.000                                                                 | 0.000                                                                  | 0.000                                                         |
| a2-c8     | -54.377                                | -38.402                                                        | 2.395                                                                 | -2.460                                                                 | -15.910                                                       |
| a2-c5     | -20.318                                | -20.318                                                        | 0.000                                                                 | 0.000                                                                  | 0.000                                                         |
| a2-c4     | -55.113                                | -38.901                                                        | 1.340                                                                 | -2.003                                                                 | -15.549                                                       |
| a2-c7     | -28.293                                | -26.102                                                        | 0.000                                                                 | -0.289                                                                 | -1.902                                                        |
| a2-c2     | -139.245                               | -57.571                                                        | 21.734                                                                | -8.187                                                                 | -95.221                                                       |
| a2-c3     | -43.151                                | -32.439                                                        | 0.684                                                                 | -0.859                                                                 | -10.538                                                       |
| a2-c6     | -23.828                                | -23.828                                                        | 0.000                                                                 | 0.000                                                                  | 0.000                                                         |
| a2-a7     | 22.066                                 | 22.066                                                         | 0.000                                                                 | 0.000                                                                  | 0.000                                                         |
| a3-c1     | -33.760                                | -27.883                                                        | 2.005                                                                 | -1.026                                                                 | -6.856                                                        |
| a3-c8     | -20.922                                | -20.922                                                        | 0.000                                                                 | 0.000                                                                  | 0.000                                                         |
| a3-c5     | -52.093                                | -36.030                                                        | 2.288                                                                 | -2.432                                                                 | -15.919                                                       |
| a3-c4     | -33.595                                | -33.595                                                        | 0.000                                                                 | 0.000                                                                  | 0.000                                                         |
| a3-c7     | -20.992                                | -20.992                                                        | 0.000                                                                 | 0.000                                                                  | 0.000                                                         |
| a3-c2     | -22.077                                | -22.077                                                        | 0.000                                                                 | 0.000                                                                  | 0.000                                                         |
| a3-c3     | -140.879                               | -58.667                                                        | 21.821                                                                | -8.593                                                                 | -95.440                                                       |
| a3-c6     | -24.765                                | -24.765                                                        | 0.000                                                                 | 0.000                                                                  | 0.000                                                         |
| a3-a7     | 20.613                                 | 20.613                                                         | 0.000                                                                 | 0.000                                                                  | 0.000                                                         |
| a3-a2     | 26.866                                 | 26.866                                                         | 0.000                                                                 | 0.000                                                                  | 0.000                                                         |
| a6-c1     | -19.754                                | -19.754                                                        | 0.000                                                                 | 0.000                                                                  | 0.000                                                         |
| a6-c8     | -34.362                                | -28.669                                                        | 2.204                                                                 | -1.084                                                                 | -6.813                                                        |
| a6-c5     | -32.064                                | -32.064                                                        | 0.000                                                                 | 0.000                                                                  | 0.000                                                         |
| a6-c4     | -59.992                                | -41.677                                                        | 2.518                                                                 | -2.463                                                                 | -18.370                                                       |
| a6-c7     | -24.213                                | -24.213                                                        | 0.000                                                                 | 0.000                                                                  | 0.000                                                         |
| a6-c2     | -22.836                                | -22.836                                                        | 0.000                                                                 | 0.000                                                                  | 0.000                                                         |
| a6-c3     | -61.996                                | -40.626                                                        | 2.303                                                                 | -1.587                                                                 | -22.086                                                       |
| a6-c6     | -139.150                               | -57.574                                                        | 21.785                                                                | -8.315                                                                 | -95.046                                                       |
| a6-a7     | 21.117                                 | 21.117                                                         | 0.000                                                                 | 0.000                                                                  | 0.000                                                         |
| a6-a2     | 24.252                                 | 24.252                                                         | 0.000                                                                 | 0.000                                                                  | 0.000                                                         |
| a6-a3     | 30.720                                 | 30.720                                                         | 0.000                                                                 | 0.000                                                                  | 0.000                                                         |
| a1-c1     | -138.826                               | -57.276                                                        | 21.807                                                                | -8.322                                                                 | -95.034                                                       |

Table S4 (Continued)

| fragments | total interaction energy<br>(kcal/mol) | electrostatic interaction<br>energy ( $E_{es}$ )<br>(kcal/mol) | exchange repulsion in-<br>teraction energy ( $E_{ex}$ )<br>(kcal/mol) | charge-transfer interac-<br>tion energy ( $E_{ct} + \text{mix}$ )<br>(kcal/mol) | dispersion interaction<br>energy ( $E_{disp}$ )<br>(kcal/mol) |
|-----------|----------------------------------------|----------------------------------------------------------------|-----------------------------------------------------------------------|---------------------------------------------------------------------------------|---------------------------------------------------------------|
| a1-c8     | -61.219                                | -39.859                                                        | 2.303                                                                 | -1.571                                                                          | -22.092                                                       |
| a1-c5     | -22.632                                | -22.632                                                        | 0.000                                                                 | 0.000                                                                           | 0.000                                                         |
| a1-c4     | -24.522                                | -24.522                                                        | 0.000                                                                 | 0.000                                                                           | 0.000                                                         |
| a1-c7     | -58.734                                | -40.478                                                        | 2.525                                                                 | -2.440                                                                          | -18.340                                                       |
| a1-c2     | -32.519                                | -32.519                                                        | 0.000                                                                 | 0.000                                                                           | 0.000                                                         |
| a1-c3     | -34.749                                | -29.034                                                        | 2.200                                                                 | -1.094                                                                          | -6.820                                                        |
| a1-c6     | -19.748                                | -19.748                                                        | 0.000                                                                 | 0.000                                                                           | 0.000                                                         |
| a1-a7     | 31.360                                 | 31.360                                                         | 0.000                                                                 | 0.000                                                                           | 0.000                                                         |
| a1-a2     | 4.391                                  | 43.180                                                         | 8.581                                                                 | -3.456                                                                          | -43.915                                                       |
| a1-a3     | 25.913                                 | 25.913                                                         | 0.000                                                                 | 0.000                                                                           | 0.000                                                         |
| a1-a6     | 21.330                                 | 21.330                                                         | 0.000                                                                 | 0.000                                                                           | 0.000                                                         |
| a8-c1     | -24.926                                | -24.926                                                        | 0.000                                                                 | 0.000                                                                           | 0.000                                                         |
| a8-c8     | -140.619                               | -58.461                                                        | 21.848                                                                | -8.564                                                                          | -95.442                                                       |
| a8-c5     | -22.044                                | -22.044                                                        | 0.000                                                                 | 0.000                                                                           | 0.000                                                         |
| a8-c4     | -21.352                                | -21.352                                                        | 0.000                                                                 | 0.000                                                                           | 0.000                                                         |
| a8-c7     | -33.281                                | -33.281                                                        | 0.000                                                                 | 0.000                                                                           | 0.000                                                         |
| a8-c2     | -53.368                                | -37.238                                                        | 2.281                                                                 | -2.462                                                                          | -15.948                                                       |
| a8-c3     | -21.187                                | -21.187                                                        | 0.000                                                                 | 0.000                                                                           | 0.000                                                         |
| a8-c6     | -34.119                                | -28.230                                                        | 2.004                                                                 | -1.037                                                                          | -6.857                                                        |
| a8-a7     | 26.690                                 | 26.690                                                         | 0.000                                                                 | 0.000                                                                           | 0.000                                                         |
| a8-a2     | 27.676                                 | 32.725                                                         | 0.023                                                                 | -0.337                                                                          | -4.734                                                        |
| a8-a3     | 18.920                                 | 18.920                                                         | 0.000                                                                 | 0.000                                                                           | 0.000                                                         |
| a8-a6     | 25.921                                 | 25.921                                                         | 0.000                                                                 | 0.000                                                                           | 0.000                                                         |
| a8-a1     | 30.713                                 | 30.713                                                         | 0.000                                                                 | 0.000                                                                           | 0.000                                                         |
| a5-c1     | -23.955                                | -23.955                                                        | 0.000                                                                 | 0.000                                                                           | 0.000                                                         |
| a5-c8     | -43.031                                | -32.316                                                        | 0.684                                                                 | -0.857                                                                          | -10.541                                                       |
| a5-c5     | -138.818                               | -57.170                                                        | 21.759                                                                | -8.180                                                                          | -95.226                                                       |
| a5-c4     | -28.893                                | -26.713                                                        | 0.000                                                                 | -0.290                                                                          | -1.890                                                        |
| a5-c7     | -54.553                                | -38.370                                                        | 1.347                                                                 | -1.996                                                                          | -15.534                                                       |
| a5-c2     | -20.560                                | -20.560                                                        | 0.000                                                                 | 0.000                                                                           | 0.000                                                         |
| a5-c3     | -55.665                                | -39.623                                                        | 2.386                                                                 | -2.494                                                                          | -15.935                                                       |
| a5-c6     | -32.572                                | -32.572                                                        | 0.000                                                                 | 0.000                                                                           | 0.000                                                         |
| a5-a7     | 31.288                                 | 31.288                                                         | 0.000                                                                 | 0.000                                                                           | 0.000                                                         |
| a5-a2     | 23.289                                 | 23.289                                                         | 0.000                                                                 | 0.000                                                                           | 0.000                                                         |
| a5-a3     | 27.653                                 | 32.706                                                         | 0.023                                                                 | -0.338                                                                          | -4.738                                                        |
| a5-a6     | 4.419                                  | 43.211                                                         | 8.581                                                                 | -3.456                                                                          | -43.919                                                       |
| a5-a1     | 24.227                                 | 24.227                                                         | 0.000                                                                 | 0.000                                                                           | 0.000                                                         |
| a5-a8     | 26.857                                 | 26.857                                                         | 0.000                                                                 | 0.000                                                                           | 0.000                                                         |
| a4-c1     | -17.961                                | -17.961                                                        | 0.000                                                                 | 0.000                                                                           | 0.000                                                         |
| a4-c8     | -19.625                                | -19.625                                                        | 0.000                                                                 | 0.000                                                                           | 0.000                                                         |
| a4-c5     | -18.268                                | -18.268                                                        | 0.000                                                                 | 0.000                                                                           | 0.000                                                         |
| a4-c4     | -140.975                               | -58.688                                                        | 21.678                                                                | -8.458                                                                          | -95.506                                                       |
| a4-c7     | -16.562                                | -16.562                                                        | 0.000                                                                 | 0.000                                                                           | 0.000                                                         |
| a4-c2     | -55.029                                | -38.908                                                        | 1.394                                                                 | -1.994                                                                          | -15.522                                                       |
| a4-c3     | -33.720                                | -33.720                                                        | 0.000                                                                 | 0.000                                                                           | 0.000                                                         |
| a4-c6     | -61.770                                | -43.630                                                        | 2.693                                                                 | -2.522                                                                          | -18.311                                                       |
| a4-a7     | 14.979                                 | 14.979                                                         | 0.000                                                                 | 0.000                                                                           | 0.000                                                         |
| a4-a2     | 31.300                                 | 31.300                                                         | 0.000                                                                 | 0.000                                                                           | 0.000                                                         |
| a4-a3     | 26.676                                 | 26.676                                                         | 0.000                                                                 | 0.000                                                                           | 0.000                                                         |
| a4-a6     | 31.355                                 | 31.355                                                         | 0.000                                                                 | 0.000                                                                           | 0.000                                                         |
| a4-a1     | 21.112                                 | 21.112                                                         | 0.000                                                                 | 0.000                                                                           | 0.000                                                         |
| a4-a8     | 20.625                                 | 20.625                                                         | 0.000                                                                 | 0.000                                                                           | 0.000                                                         |
| a4-a5     | 22.071                                 | 22.071                                                         | 0.000                                                                 | 0.000                                                                           | 0.000                                                         |

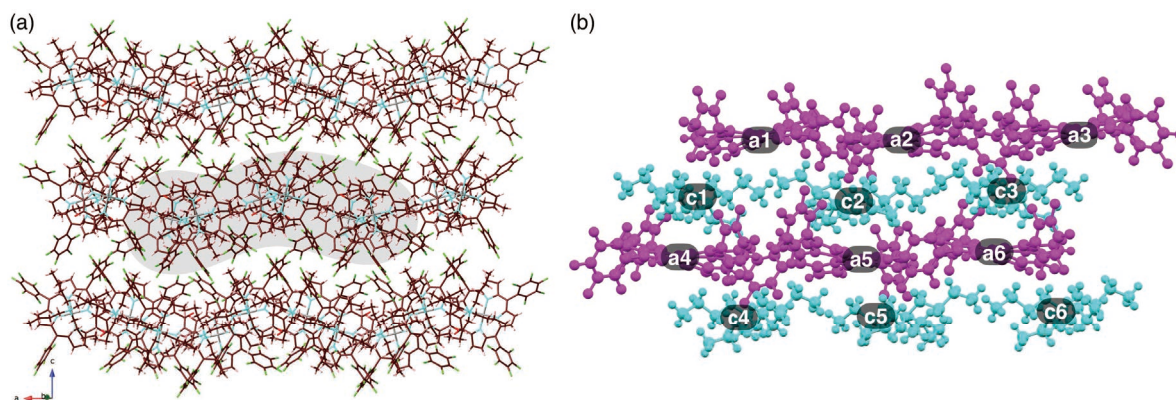

**Fig. S79** Single-crystal X-ray structure of **2ni**-TBA<sup>+</sup>[S5b] for the EDA calculation (Table S5): (a) top view of charge-by-charge structure and (b) side view of shaded part in (a). The labels (a1–6 and c1–6) correspond to the fragments shown in Table S5.  $E_{\text{tot}}$  of  $-169.0$  and  $-129.1$  kcal/mol were observed for charge-by-charge stacking ion pairs of a5-c2 and a5-c5, respectively, with the contributions of  $E_{\text{cs}}/E_{\text{disp}}$  of  $-68.34/-111.1$  and  $-68.08/-67.66$  kcal/mol, respectively.  $E_{\text{tot}}$  of  $-83.34$  and  $-23.77$  kcal/mol were observed for a5-c4 and a5-c6 ion pairs, respectively, indicating the smaller attractive interaction energies compared to charge-by-charge stacking ion pairs (a5-c2 and a5-c5). On the other hand, identically charged ions c1-c2 was in energetically disfavored state, which is mainly contributed by the electrostatic repulsion. Atom color code in (a): brown, pink, cyan, red, green, and gray refer to carbon, hydrogen, nitrogen, oxygen, fluorine, and nickel, respectively. Color code in (b): magenta and cyan refer to anion and cation parts, respectively.

**Table S5** Energies between each fragment in **2ni**<sup>-</sup>-TBA<sup>+</sup> (Fig. S79) estimated by EDA calculation<sup>[S15]</sup> based on an FMO2-MP2 using mixed basis sets including NOSeC-V-TZP with MCP for Ni and NOSeC-V-DZP with MCP for the other atoms.<sup>[S16–18]</sup>

| fragments | total interaction energy<br>(kcal/mol) | electrostatic interaction<br>energy ( $E_{es}$ )<br>(kcal/mol) | exchange repulsion in-<br>teraction energy ( $E_{ex}$ )<br>(kcal/mol) | charge-transfer interac-<br>tion energy ( $E_{ct+mix}$ )<br>(kcal/mol) | dispersion interaction<br>energy ( $E_{disp}$ )<br>(kcal/mol) |
|-----------|----------------------------------------|----------------------------------------------------------------|-----------------------------------------------------------------------|------------------------------------------------------------------------|---------------------------------------------------------------|
| a4-a2     | 22.065                                 | 22.065                                                         | 0.000                                                                 | 0.000                                                                  | 0.000                                                         |
| a6-a2     | 10.828                                 | 24.888                                                         | 0.783                                                                 | -0.536                                                                 | -14.307                                                       |
| a6-a4     | 15.251                                 | 15.251                                                         | 0.000                                                                 | 0.000                                                                  | 0.000                                                         |
| a1-a2     | -28.917                                | 20.130                                                         | 10.464                                                                | -5.834                                                                 | -53.677                                                       |
| a1-a4     | 30.520                                 | 36.652                                                         | 0.003                                                                 | -0.039                                                                 | -6.095                                                        |
| a1-a6     | 15.233                                 | 15.233                                                         | 0.000                                                                 | 0.000                                                                  | 0.000                                                         |
| a3-a2     | -29.662                                | 19.400                                                         | 10.491                                                                | -5.855                                                                 | -53.698                                                       |
| a3-a4     | 13.407                                 | 13.407                                                         | 0.000                                                                 | 0.000                                                                  | 0.000                                                         |
| a3-a6     | 30.226                                 | 36.355                                                         | 0.003                                                                 | -0.036                                                                 | -6.095                                                        |
| a3-a1     | 15.366                                 | 15.366                                                         | 0.000                                                                 | 0.000                                                                  | 0.000                                                         |
| a5-a2     | 30.335                                 | 36.442                                                         | 0.003                                                                 | -0.042                                                                 | -6.067                                                        |
| a5-a4     | -29.948                                | 19.170                                                         | 10.365                                                                | -5.832                                                                 | -53.652                                                       |
| a5-a6     | -29.531                                | 19.546                                                         | 10.358                                                                | -5.830                                                                 | -53.606                                                       |
| a5-a1     | 11.054                                 | 25.127                                                         | 0.785                                                                 | -0.532                                                                 | -14.325                                                       |
| a5-a3     | 22.019                                 | 22.019                                                         | 0.000                                                                 | 0.000                                                                  | 0.000                                                         |
| c1-a2     | -23.508                                | -23.508                                                        | 0.000                                                                 | 0.000                                                                  | 0.000                                                         |
| c1-a4     | -169.357                               | -68.762                                                        | 20.642                                                                | -10.156                                                                | -111.082                                                      |
| c1-a6     | -14.100                                | -14.100                                                        | 0.000                                                                 | 0.000                                                                  | 0.000                                                         |
| c1-a1     | -127.824                               | -67.325                                                        | 13.298                                                                | -6.307                                                                 | -67.489                                                       |
| c1-a3     | -13.348                                | -13.348                                                        | 0.000                                                                 | 0.000                                                                  | 0.000                                                         |
| c1-a5     | -45.464                                | -23.902                                                        | 2.669                                                                 | -1.845                                                                 | -22.385                                                       |
| c3-a2     | -82.284                                | -38.233                                                        | 7.406                                                                 | -4.157                                                                 | -47.300                                                       |
| c3-a4     | -15.590                                | -15.590                                                        | 0.000                                                                 | 0.000                                                                  | 0.000                                                         |
| c3-a6     | -169.298                               | -68.621                                                        | 20.699                                                                | -10.374                                                                | -111.001                                                      |
| c3-a1     | -17.137                                | -17.137                                                        | 0.000                                                                 | 0.000                                                                  | 0.000                                                         |
| c3-a3     | -127.868                               | -67.524                                                        | 13.434                                                                | -6.320                                                                 | -67.458                                                       |
| c3-a5     | -29.803                                | -29.803                                                        | 0.000                                                                 | 0.000                                                                  | 0.000                                                         |
| c3-c1     | 15.079                                 | 15.079                                                         | 0.000                                                                 | 0.000                                                                  | 0.000                                                         |
| c5-a2     | -25.650                                | -25.650                                                        | 0.000                                                                 | 0.000                                                                  | 0.000                                                         |
| c5-a4     | -23.869                                | -23.869                                                        | 0.000                                                                 | 0.000                                                                  | 0.000                                                         |
| c5-a6     | -83.724                                | -38.690                                                        | 7.429                                                                 | -4.759                                                                 | -47.703                                                       |
| c5-a1     | -19.306                                | -19.306                                                        | 0.000                                                                 | 0.000                                                                  | 0.000                                                         |
| c5-a3     | -20.960                                | -20.960                                                        | 0.000                                                                 | 0.000                                                                  | 0.000                                                         |
| c5-a5     | -129.072                               | -68.075                                                        | 13.449                                                                | -6.784                                                                 | -67.663                                                       |
| c5-c1     | 19.316                                 | 19.316                                                         | 0.000                                                                 | 0.000                                                                  | 0.000                                                         |
| c5-c3     | 28.870                                 | 28.870                                                         | 0.000                                                                 | 0.000                                                                  | 0.000                                                         |
| c2-a2     | -127.911                               | -67.512                                                        | 13.417                                                                | -6.352                                                                 | -67.464                                                       |
| c2-a4     | -30.136                                | -30.136                                                        | 0.000                                                                 | 0.000                                                                  | 0.000                                                         |
| c2-a6     | -45.776                                | -24.223                                                        | 2.667                                                                 | -1.848                                                                 | -22.372                                                       |
| c2-a1     | -83.524                                | -39.398                                                        | 7.359                                                                 | -4.170                                                                 | -47.314                                                       |
| c2-a3     | -23.549                                | -23.549                                                        | 0.000                                                                 | 0.000                                                                  | 0.000                                                         |
| c2-a5     | -168.999                               | -68.335                                                        | 20.730                                                                | -10.306                                                                | -111.088                                                      |
| c2-c1     | 22.386                                 | 28.973                                                         | 1.300                                                                 | -0.591                                                                 | -7.296                                                        |
| c2-c3     | 22.146                                 | 28.728                                                         | 1.301                                                                 | -0.587                                                                 | -7.296                                                        |
| c2-c5     | 35.089                                 | 35.089                                                         | 0.000                                                                 | 0.000                                                                  | 0.000                                                         |
| c4-a2     | -20.859                                | -20.859                                                        | 0.000                                                                 | 0.000                                                                  | 0.000                                                         |
| c4-a4     | -129.630                               | -68.646                                                        | 13.490                                                                | -6.800                                                                 | -67.674                                                       |
| c4-a6     | -16.956                                | -16.956                                                        | 0.000                                                                 | 0.000                                                                  | 0.000                                                         |
| c4-a1     | -25.677                                | -25.677                                                        | 0.000                                                                 | 0.000                                                                  | 0.000                                                         |
| c4-a3     | -13.725                                | -13.725                                                        | 0.000                                                                 | 0.000                                                                  | 0.000                                                         |
| c4-a5     | -83.335                                | -38.333                                                        | 7.425                                                                 | -4.732                                                                 | -47.695                                                       |
| c4-c1     | 34.882                                 | 34.882                                                         | 0.000                                                                 | 0.000                                                                  | 0.000                                                         |
| c4-c3     | 16.515                                 | 16.515                                                         | 0.000                                                                 | 0.000                                                                  | 0.000                                                         |
| c4-c5     | 22.707                                 | 29.293                                                         | 1.290                                                                 | -0.588                                                                 | -7.288                                                        |
| c4-c2     | 28.843                                 | 28.843                                                         | 0.000                                                                 | 0.000                                                                  | 0.000                                                         |
| c6-a2     | -19.171                                | -19.171                                                        | 0.000                                                                 | 0.000                                                                  | 0.000                                                         |
| c6-a4     | -13.453                                | -13.453                                                        | 0.000                                                                 | 0.000                                                                  | 0.000                                                         |
| c6-a6     | -128.748                               | -67.683                                                        | 13.354                                                                | -6.745                                                                 | -67.674                                                       |
| c6-a1     | -12.897                                | -12.897                                                        | 0.000                                                                 | 0.000                                                                  | 0.000                                                         |
| c6-a3     | -25.912                                | -25.912                                                        | 0.000                                                                 | 0.000                                                                  | 0.000                                                         |
| c6-a5     | -23.770                                | -23.770                                                        | 0.000                                                                 | 0.000                                                                  | 0.000                                                         |
| c6-c1     | 12.287                                 | 12.287                                                         | 0.000                                                                 | 0.000                                                                  | 0.000                                                         |
| c6-c3     | 35.849                                 | 35.849                                                         | 0.000                                                                 | 0.000                                                                  | 0.000                                                         |
| c6-c5     | 22.705                                 | 29.289                                                         | 1.292                                                                 | -0.589                                                                 | -7.287                                                        |
| c6-c2     | 19.372                                 | 19.372                                                         | 0.000                                                                 | 0.000                                                                  | 0.000                                                         |



**Table S5 (Continued)**

| fragments | total interaction energy<br>(kcal/mol) | electrostatic interaction<br>energy ( $E_{\text{es}}$ )<br>(kcal/mol) | exchange repulsion in-<br>teraction energy ( $E_{\text{ex}}$ )<br>(kcal/mol) | charge-transfer interac-<br>tion energy ( $E_{\text{ct}} + \text{mix}$ )<br>(kcal/mol) | dispersion interaction<br>energy ( $E_{\text{disp}}$ )<br>(kcal/mol) |
|-----------|----------------------------------------|-----------------------------------------------------------------------|------------------------------------------------------------------------------|----------------------------------------------------------------------------------------|----------------------------------------------------------------------|
| c6-c4     | 15.173                                 | 15.173                                                                | 0.000                                                                        | 0.000                                                                                  | 0.000                                                                |

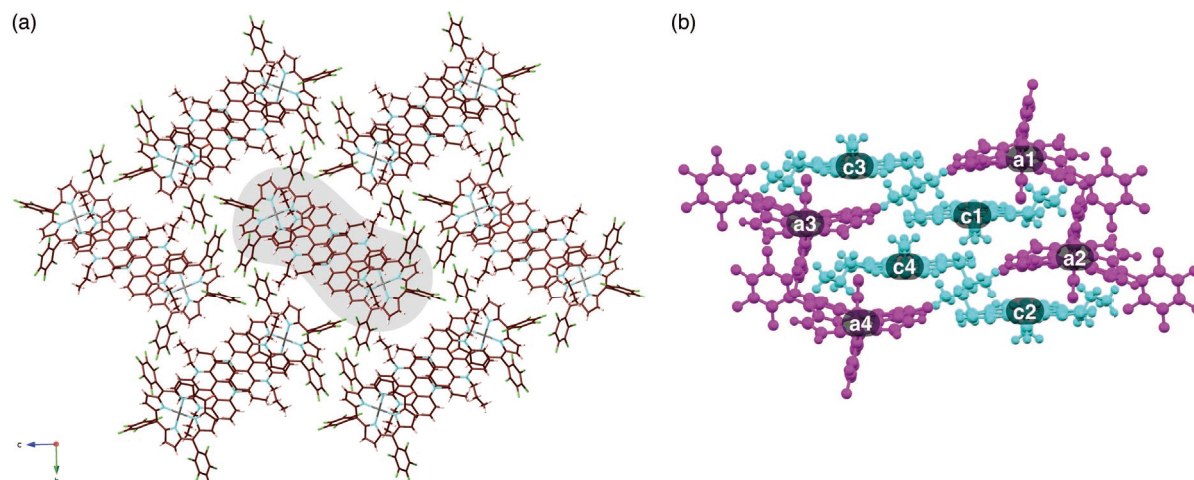

**Fig. S80** Single-crystal X-ray structure of **2ni**<sup>−</sup>-TATA<sup>+</sup> for the EDA calculation (Table S6): (a) top view of charge-by-charge structure and (b) side view of shaded part in (a). The labels (a1–4 and c1–4) correspond to the fragments shown in Table S6.  $E_{\text{tot}}$  of the oppositely charged stacking ion pair a2-c2 was −196.2 kcal/mol, whose absolute value was larger than that of the ion pair located at the lateral positions (−63.42 kcal/mol for a2-c4). The main contributions in attractive forces in **2ni**<sup>−</sup>-TATA<sup>+</sup> were  $E_{\text{es}}$  and  $E_{\text{disp}}$  with the values of −69.72 and −141.9 kcal/mol, respectively, for the ion pair a2-c2. The  $E_{\text{es}}$  values were rather similar to the values observed in the charge-by-charge stacking ion pairs of **2ni**<sup>−</sup>-TBA<sup>+</sup> (Fig. S79). On the other hand, characteristic large  $E_{\text{disp}}$  contribution can be attributed to the overlap of  $\pi$ -planes.  $E_{\text{disp}}$  values (absolute values) of a2-c1 (−63.30 kcal/mol) and a2-c4 (−21.14 kcal/mol) are smaller than that of a2-c2 due to the less or no overlapping of core  $\pi$ -planes. Similarly, the stacking of TATA<sup>+</sup> in **2ni**<sup>−</sup>-TATA<sup>+</sup> (c1-c4) is stabilized by the contribution of dispersion interaction. These results strongly support that dispersion interaction is a key for controlling the locations of identically charged species. Atom color code in (a): brown, pink, cyan, red, green, and gray refer to carbon, hydrogen, nitrogen, oxygen, fluorine, and nickel, respectively. Color code in (b): magenta and cyan refer to anion and cation parts, respectively.

**Table S6** Energies between each fragment in **2ni**<sup>-</sup>-TATA<sup>+</sup> (Fig. S80) estimated by EDA calculation<sup>[S15]</sup> based on an FMO2-MP2 using mixed basis sets including NOSeC-V-TZP with MCP for Ni and NOSeC-V-DZP with MCP for the other atoms.<sup>[S16–18]</sup>

| fragments | total interaction energy<br>(kcal/mol) | electrostatic interaction<br>energy ( $E_{es}$ )<br>(kcal/mol) | exchange repulsion in-<br>teraction energy ( $E_{ex}$ )<br>(kcal/mol) | charge-transfer interac-<br>tion energy ( $E_{ct+mix}$ )<br>(kcal/mol) | dispersion interaction<br>energy ( $E_{disp}$ )<br>(kcal/mol) |
|-----------|----------------------------------------|----------------------------------------------------------------|-----------------------------------------------------------------------|------------------------------------------------------------------------|---------------------------------------------------------------|
| a2-a1     | -2.562                                 | 34.854                                                         | 3.746                                                                 | -2.166                                                                 | -38.995                                                       |
| a3-a1     | 33.586                                 | 33.586                                                         | 0.000                                                                 | 0.000                                                                  | 0.000                                                         |
| a3-a2     | 22.760                                 | 22.760                                                         | 0.000                                                                 | 0.000                                                                  | 0.000                                                         |
| a4-a1     | 25.937                                 | 25.937                                                         | 0.000                                                                 | 0.000                                                                  | 0.000                                                         |
| a4-a2     | 33.581                                 | 33.581                                                         | 0.000                                                                 | 0.000                                                                  | 0.000                                                         |
| a4-a3     | -2.649                                 | 34.769                                                         | 3.750                                                                 | -2.167                                                                 | -39.001                                                       |
| c1-a1     | -192.461                               | -66.417                                                        | 28.999                                                                | -13.342                                                                | -141.701                                                      |
| c1-a2     | -111.808                               | -53.658                                                        | 11.406                                                                | -6.254                                                                 | -63.302                                                       |
| c1-a3     | -63.177                                | -43.060                                                        | 3.401                                                                 | -2.387                                                                 | -21.130                                                       |
| c1-a4     | -35.983                                | -32.530                                                        | 0.000                                                                 | -0.578                                                                 | -2.876                                                        |
| c2-a1     | -27.529                                | -27.529                                                        | 0.000                                                                 | 0.000                                                                  | 0.000                                                         |
| c2-a2     | -196.168                               | -69.723                                                        | 29.491                                                                | -14.044                                                                | -141.892                                                      |
| c2-a3     | -22.086                                | -22.086                                                        | 0.000                                                                 | 0.000                                                                  | 0.000                                                         |
| c2-a4     | -64.848                                | -44.270                                                        | 3.523                                                                 | -2.850                                                                 | -21.251                                                       |
| c2-c1     | 34.075                                 | 34.075                                                         | 0.000                                                                 | 0.000                                                                  | 0.000                                                         |
| c3-a1     | -65.097                                | -44.511                                                        | 3.524                                                                 | -2.856                                                                 | -21.253                                                       |
| c3-a2     | -22.136                                | -22.136                                                        | 0.000                                                                 | 0.000                                                                  | 0.000                                                         |
| c3-a3     | -195.919                               | -69.473                                                        | 29.487                                                                | -14.035                                                                | -141.898                                                      |
| c3-a4     | -27.478                                | -27.478                                                        | 0.000                                                                 | 0.000                                                                  | 0.000                                                         |
| c3-c1     | 0.096                                  | 34.713                                                         | 7.282                                                                 | -4.118                                                                 | -37.781                                                       |
| c3-c2     | 20.200                                 | 20.200                                                         | 0.000                                                                 | 0.000                                                                  | 0.000                                                         |
| c4-a1     | -36.139                                | -32.682                                                        | 0.000                                                                 | -0.577                                                                 | -2.880                                                        |
| c4-a2     | -63.417                                | -43.291                                                        | 3.401                                                                 | -2.392                                                                 | -21.135                                                       |
| c4-a3     | -111.700                               | -53.547                                                        | 11.405                                                                | -6.254                                                                 | -63.304                                                       |
| c4-a4     | -192.210                               | -66.166                                                        | 28.995                                                                | -13.332                                                                | -141.708                                                      |
| c4-c1     | -47.122                                | 33.269                                                         | 18.101                                                                | -7.466                                                                 | -91.026                                                       |
| c4-c2     | 0.106                                  | 34.725                                                         | 7.281                                                                 | -4.116                                                                 | -37.784                                                       |
| c4-c3     | 34.068                                 | 34.068                                                         | 0.000                                                                 | 0.000                                                                  | 0.000                                                         |

**Table S7** Energies between anion and cation for monomeric ion pairs extracted from the crystal structures **2ni**<sup>-</sup>-TBA<sup>+</sup><sup>[S5b]</sup> and **2ni**<sup>-</sup>-TATA<sup>+</sup> (Fig. S28) estimated by EDA calculation<sup>[S15]</sup> based on an FMO2-MP2 using mixed basis sets including NOSeC-V-TZP with MCP for Ni and NOSeC-V-DZP with MCP for the other atoms.<sup>[S16–18]</sup> The most stable monomeric ion pairs, c3-a6 and c2-a2 for **2ni**<sup>-</sup>-TBA<sup>+</sup> and **2ni**<sup>-</sup>-TATA<sup>+</sup>, respectively, were selected according to the EDA calculations of packing structures (Fig. S79,80, Table S5,6).  $E_{tot}$  values and those energy contributions of monomeric ion pairs were similar to those of the packing structures, suggesting the negligible effect of the surrounding ions.

| fragments                                  | total interaction energy<br>(kcal/mol) | electrostatic interaction<br>energy ( $E_{es}$ )<br>(kcal/mol) | exchange repulsion in-<br>teraction energy ( $E_{ex}$ )<br>(kcal/mol) | charge-transfer interac-<br>tion energy ( $E_{ct+mix}$ )<br>(kcal/mol) | dispersion interaction<br>energy ( $E_{disp}$ )<br>(kcal/mol) |
|--------------------------------------------|----------------------------------------|----------------------------------------------------------------|-----------------------------------------------------------------------|------------------------------------------------------------------------|---------------------------------------------------------------|
| <b>2ni</b> <sup>-</sup> -TBA <sup>+</sup>  | -175.081                               | -74.176                                                        | 20.558                                                                | -10.289                                                                | -111.175                                                      |
| <b>2ni</b> <sup>-</sup> -TATA <sup>+</sup> | -196.473                               | -70.294                                                        | 29.058                                                                | -13.489                                                                | -141.749                                                      |

**Table S8** Energies between anion and cation for optimized monomeric ion pairs **2ni**<sup>-</sup>-TBA<sup>+</sup> and **2ni**<sup>-</sup>-TATA<sup>+</sup> (Fig. S44) estimated by EDA calculation<sup>[S15]</sup> based on an FMO2-MP2 using mixed basis sets including NOSeC-V-TZP with MCP for Ni and NOSeC-V-DZP with MCP for the other atoms.<sup>[S16–18]</sup>  $E_{tot}$  values (absolute values) of optimized monomeric ion pairs were larger than those of monomeric (Table S7) and packing ion pairs (Fig. S79,80, Table S5,6) in the crystal structures.

| fragments                                  | total interaction energy<br>(kcal/mol) | electrostatic interaction<br>energy ( $E_{es}$ )<br>(kcal/mol) | exchange repulsion in-<br>teraction energy ( $E_{ex}$ )<br>(kcal/mol) | charge-transfer interac-<br>tion energy ( $E_{ct+mix}$ )<br>(kcal/mol) | dispersion interaction<br>energy ( $E_{disp}$ )<br>(kcal/mol) |
|--------------------------------------------|----------------------------------------|----------------------------------------------------------------|-----------------------------------------------------------------------|------------------------------------------------------------------------|---------------------------------------------------------------|
| <b>2ni</b> <sup>-</sup> -TBA <sup>+</sup>  | -204.804                               | -90.129                                                        | 52.871                                                                | -18.296                                                                | -149.250                                                      |
| <b>2ni</b> <sup>-</sup> -TATA <sup>+</sup> | -229.567                               | -88.573                                                        | 62.514                                                                | -22.185                                                                | -181.323                                                      |

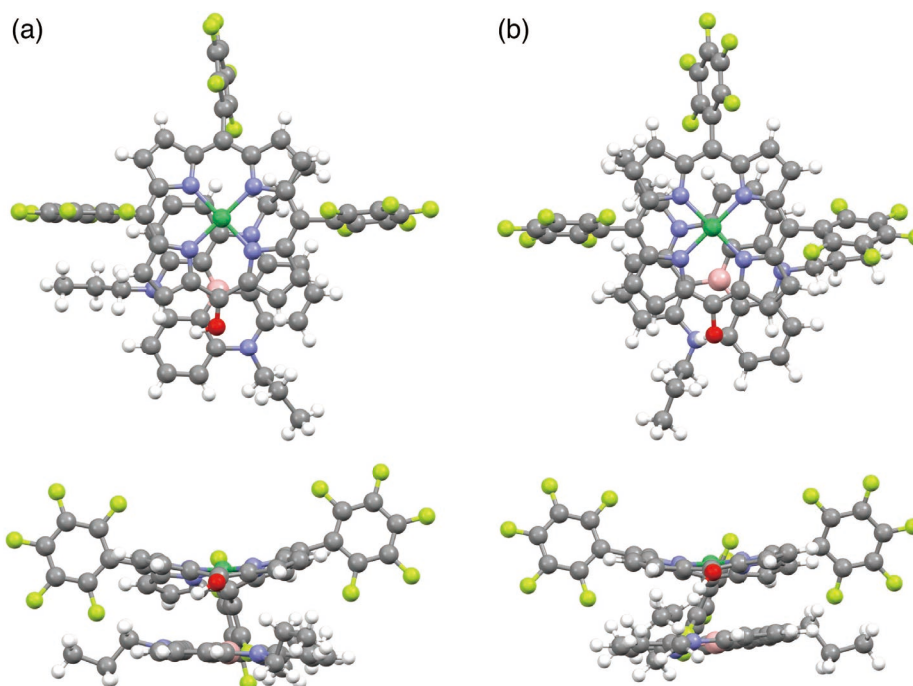

**Fig. S81** **2ni-TATAB** as a model of electronically neutral species for **2ni**<sup>-</sup>-TATA<sup>+</sup> for EDA calculation:<sup>[S15]</sup> (a) unoptimized and (b) optimized structures. Model structure of **2ni**-TATAB was prepared based on the crystal structure of monomeric **2ni**<sup>-</sup>-TATA<sup>+</sup> (Fig. S28), wherein the oxygen of **2ni**<sup>-</sup> was protonated and the central carbon of TATA<sup>+</sup> was substituted to boron. In (a), the position of the proton at oxygen was optimized using B3LYP/6-31G(d) with the fixed coordination for the other atoms, whereas, in (b), the structure was optimized using B3LYP/6-31G(d,p).

**Table S9** Energies between **2ni** and TATAB as unoptimized and optimized structures (Fig. S80) estimated by EDA calculation<sup>[S15]</sup> based on an FMO2-MP2 using mixed basis sets including NOSeC-V-TZP with MCP for Ni and NOSeC-V-DZP with MCP for the other atoms.<sup>[S16–18]</sup>  $E_{\text{tot}}$  (absolute value) of **2ni**-TATAB was smaller than that of monomeric **2ni**<sup>-</sup>-TATA<sup>+</sup> (Table S7,8) and packing **2ni**<sup>-</sup>-TATA<sup>+</sup> (Fig. S80, Table S6). In particular,  $E_{\text{es}}$  (absolute value) of **2ni**-TATAB was smaller than that of **2ni**<sup>-</sup>-TATA<sup>+</sup>, whereas  $E_{\text{disp}}$  of **2ni**-TATAB was similar to **2ni**<sup>-</sup>-TATA<sup>+</sup>. The loss of charges induced a less stable structure with the decreased electrostatic interaction along with the similar dispersion interaction.

| fragments                          | total interaction energy<br>(kcal/mol) | electrostatic interaction<br>energy ( $E_{\text{es}}$ )<br>(kcal/mol) | exchange repulsion in-<br>teraction energy ( $E_{\text{ex}}$ )<br>(kcal/mol) | charge-transfer interac-<br>tion energy ( $E_{\text{ct}} + \text{mix}$ )<br>(kcal/mol) | dispersion interaction<br>energy ( $E_{\text{disp}}$ )<br>(kcal/mol) |
|------------------------------------|----------------------------------------|-----------------------------------------------------------------------|------------------------------------------------------------------------------|----------------------------------------------------------------------------------------|----------------------------------------------------------------------|
| <b>2ni</b> -TATAB<br>(unoptimized) | -149.135                               | -24.975                                                               | 38.969                                                                       | -19.030                                                                                | -144.099                                                             |
| <b>2ni</b> -TATAB<br>(optimized)   | -168.533                               | -29.679                                                               | 59.887                                                                       | -23.222                                                                                | -175.519                                                             |

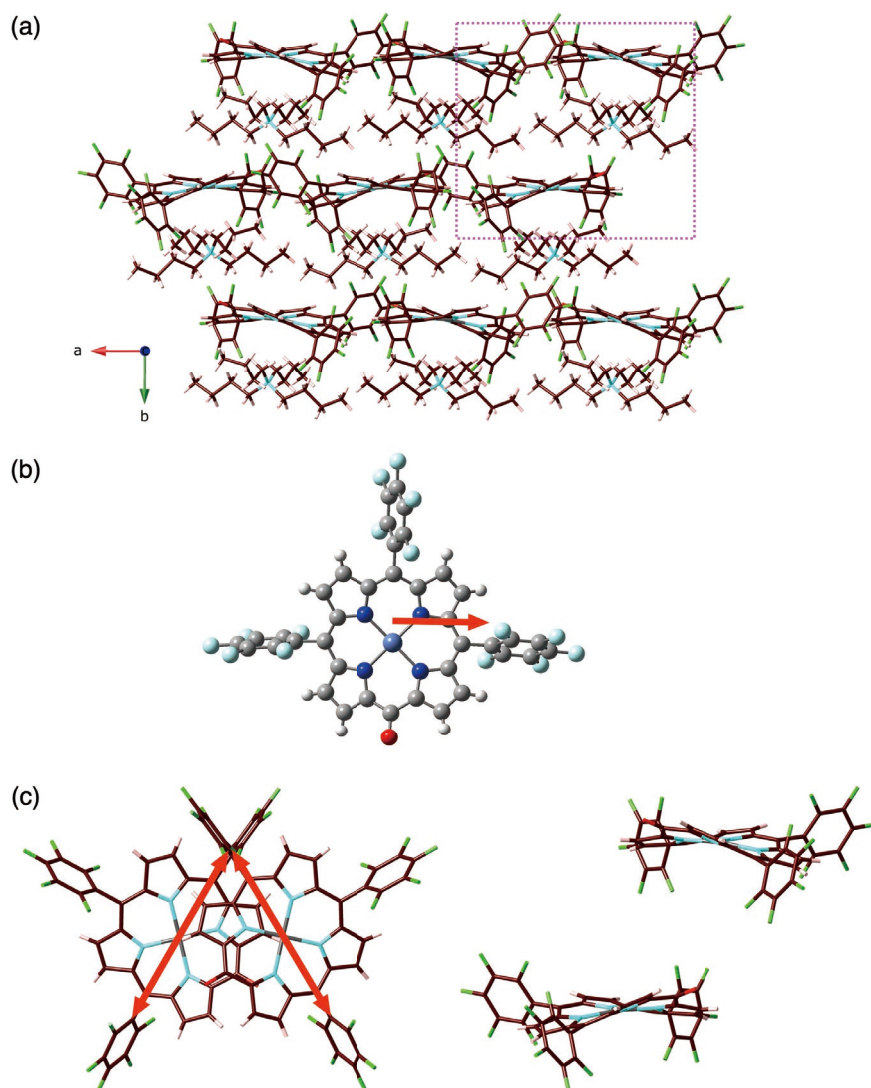

**Fig. S82** Evaluation of the transition dipole moments for the solid-state  $2\text{ni}^-$ - $\text{TBA}^+$ .<sup>[S5b]</sup> (a) packing structure of  $2\text{ni}^-$ - $\text{TBA}^+$ , (b) ground-to-excited-state transition dipole moments of  $2\text{ni}^-$  for 650 nm (HOMO-1-to-LUMO+1 and HOMO-to-LUMO transition with the strength of 4.62 D) estimated by TD-DFT calculation at B3LYP/6-31+G(d,p) of the crystal structure, and (c) oblique-arranged two  $2\text{ni}^-$  extracted from the magenta boxed area in (a). In (c), red arrows indicate direction-extended transition dipole moments with a consideration of the symmetry of structures. Nearly orthogonally arranged transition dipoles provide an almost negligible effect on the UV/vis absorption spectrum (Fig. S96a).<sup>[S19]</sup>

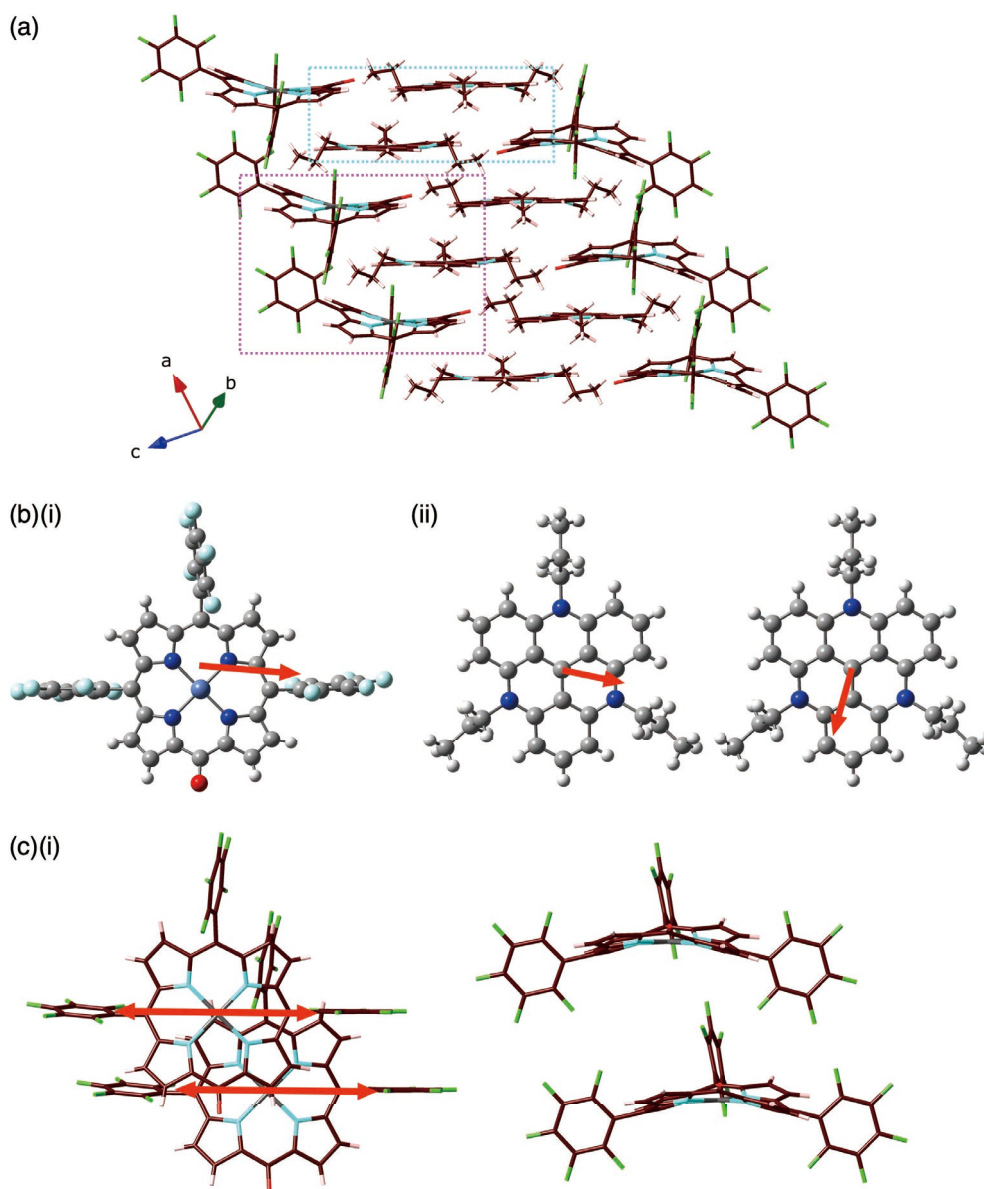

**Fig. S83** Evaluation of the transition dipole moments for the solid-state  $2\text{ni}^-$ -TATA $^+$ : (a) packing structure of  $2\text{ni}^-$ -TATA $^+$  (Fig. S28), (b) ground-to-excited-state transition dipole moments of (i)  $2\text{ni}^-$  for 662 nm (HOMO-1-to-LUMO+1 and HOMO-to-LUMO transition with the strength of 4.80 D) and (ii) TATA $^+$  for 472 and 462 nm (state 1 and 2 for HOMO-to-LUMO and HOMO-1-to-LUMO transitions with the strengths of 2.79 and 3.10 D, respectively) estimated by TD-DFT calculation at B3LYP/6-31+G(d,p) of the crystal structure (Fig. S29), and (c)(i) side-by-side-arranged two  $2\text{ni}^-$  and (ii) slipped-stacking dimeric structure of TATA $^+$  extracted from the cyan boxed area in (a). In (c)(i), red arrows indicate direction-extended transition dipole moments with a consideration of the symmetry of structures. The  $2\text{ni}^-$  units, side-by-side-arranged in the packing structure, showed the parallel-arranged transition dipole moments with the offset angle of  $75^\circ$ . The distance of  $\sim 7$  Å between two  $2\text{ni}^-$  units is within the range of distances that induce the shift of absorption spectrum by exciton coupling.<sup>[S19]</sup> The parallel-arranged transition dipole moments showed blue-shifted absorption bands for  $2\text{ni}^-$  in the solid-state absorption spectrum of  $2\text{ni}^-$ -TATA $^+$  (Fig. S96b). In (c)(ii), red arrows indicate representative transition dipole moments with a consideration of the symmetry of structures as TATA $^+$  has a centrosymmetric structure with six directions of symmetrical units. Therefore, the transition dipole moments of TATA $^+$  in state 1 can be superimposed on the slipped-stacking dimeric structure with the approximate offset angle of  $\sim 40^\circ$ . In contrast, the transition dipole moments of TATA $^+$  in state 2 are canceled out in the dimeric structure with the anti-parallel arrangement. To sum up, the head-to-tail-arranged transition dipole moments of TATA $^+$  induced red-shifted absorption bands for TATA $^+$  in the solid-state absorption spectrum of  $2\text{ni}^-$ -TATA $^+$  (Fig. S96b).



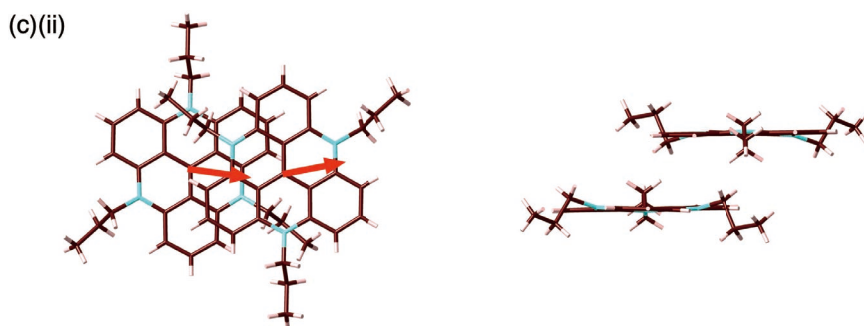

**Fig. S83** (Continued)

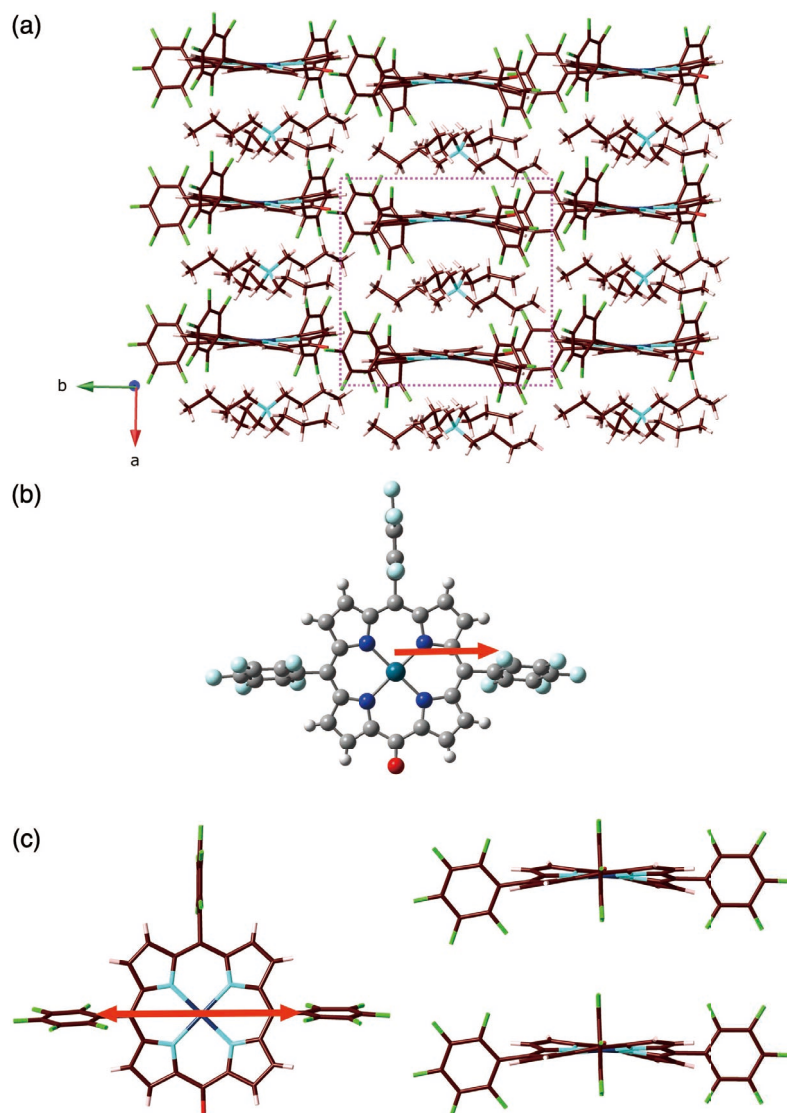

**Fig. S84** Evaluation of the transition dipole moments for the solid-state  $2\text{pd}^-$ - $\text{TBA}^+$ : (a) packing structure of  $2\text{pd}^-$ - $\text{TBA}^+$  (Fig. S22), (b) ground-to-excited-state transition dipole moments of (i)  $2\text{pd}^-$  for 654 nm (HOMO-to-LUMO transition with the strength of 5.01 D) estimated by TD-DFT calculation at B3LYP/6-31+G(d,p) of the crystal structure (Fig. S23), and (c) side-by-side-arranged two  $2\text{pd}^-$  extracted from the magenta boxed area in (a). In (c), red arrows indicate direction-extended transition dipole moments with a consideration of the symmetry of structures. The  $2\text{pd}^-$  units, with the side-by-side-arranged in the packing structure, showed the parallel-arranged transition dipole moments to the  $a$ -axis. The completely parallel-arranged transition dipole moments showed blue-shifted absorption bands for  $2\text{pd}^-$  in the solid-state absorption spectrum of  $2\text{pd}^-$ - $\text{TBA}^+$  (Fig. S96c).

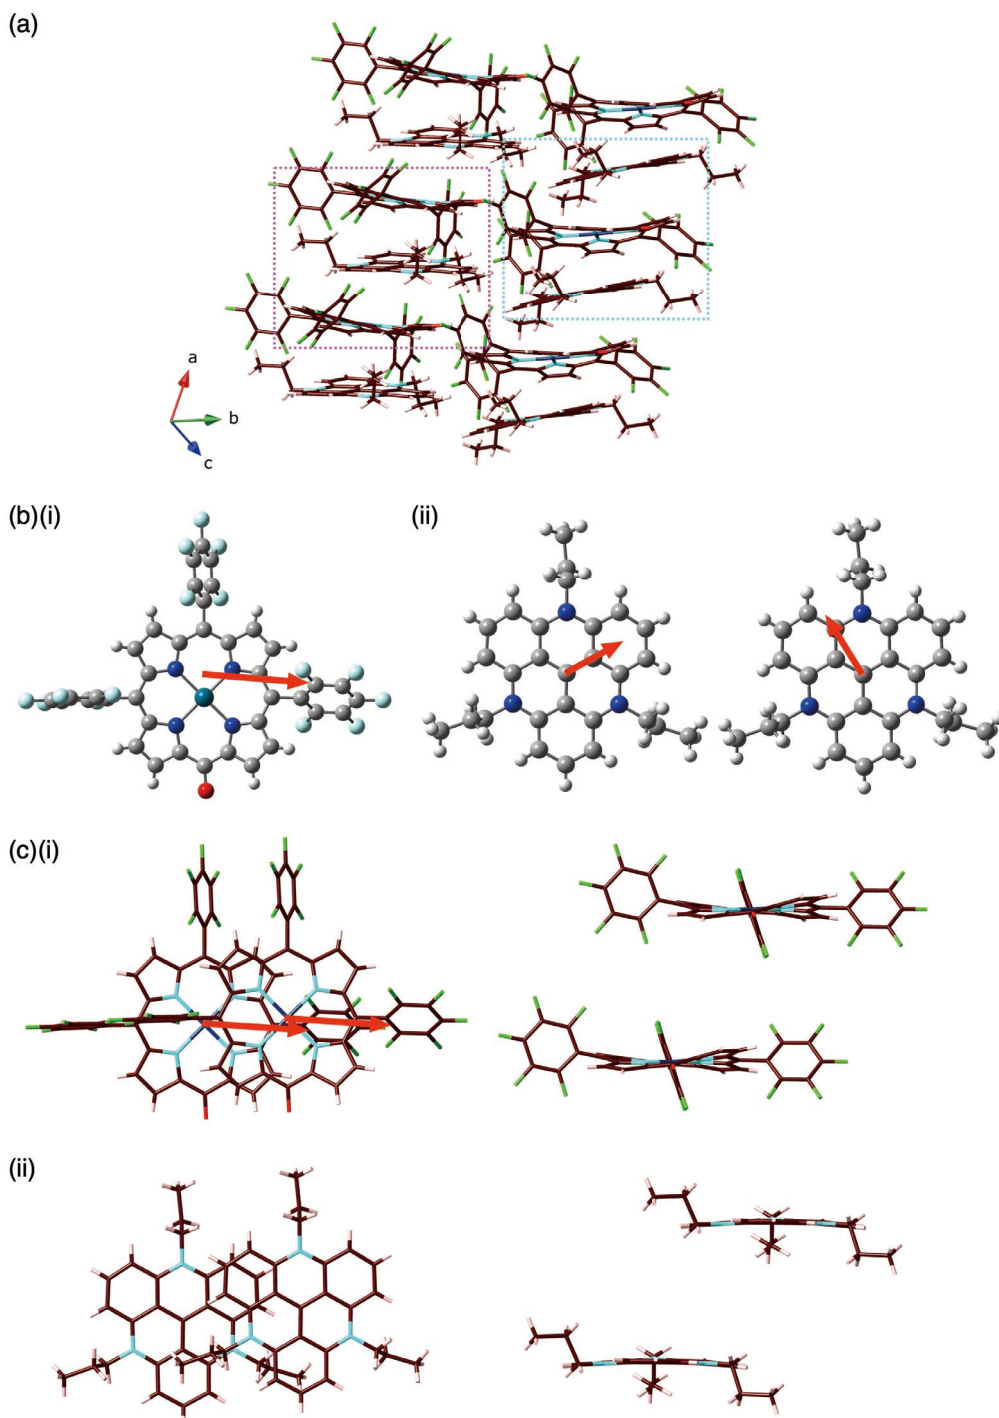

**Fig. S85** Evaluation of the transition dipole moments for the solid-state  $2\text{pd}^-$ -TATA $^+$ : (a) packing structure of  $2\text{pd}^-$ -TATA $^+$  (Fig. S30), (b) ground-to-excited-state transition dipole moments of (i)  $2\text{pd}^-$  for 678 nm (HOMO-to-LUMO transition with the strength of 5.15 D) and (ii) TATA $^+$  for 455 and 448 nm (state 1 (left) and 2 (right) for HOMO-to-LUMO and HOMO-1-to-LUMO transitions with the strengths of 2.81 and 3.06 D, respectively) estimated by TD-DFT calculation at B3LYP/6-31+G(d,p) of the crystal structure (Fig. S31), and (c)(i) side-by-side-arranged two  $2\text{pd}^-$  and (ii) slipped-stacking dimeric structure of TATA $^+$  extracted from the magenta and cyan boxed areas, respectively, in (a). In (c)(i), the  $2\text{pd}^-$  units, side-by-side-arranged in the packing structure, showed the head-to-tail-arranged transition dipole moments with the offset angle of  $60^\circ$ . The transition dipole moments, even with the offset angle that is larger than  $54.7^\circ$ , showed slightly red-shifted absorption bands for  $2\text{pd}^-$  in the solid-state absorption spectrum of  $2\text{pd}^-$ -TATA $^+$  (Fig. S96d). In (c)(ii), several combinations of the transition dipole moments of TATA $^+$  are arranged in orthogonal orientations. In addition, parallel-arranged and head-to-tail-arranged orientations are seen in the small transition dipole moments, compared to those of  $2\text{pd}^-$ , with larger distances that are not effective for exciton coupling, resulting in the small shifts for TATA $^+$  in the solid-state absorption spectrum of  $2\text{pd}^-$ -TATA $^+$  (Fig. S96d).

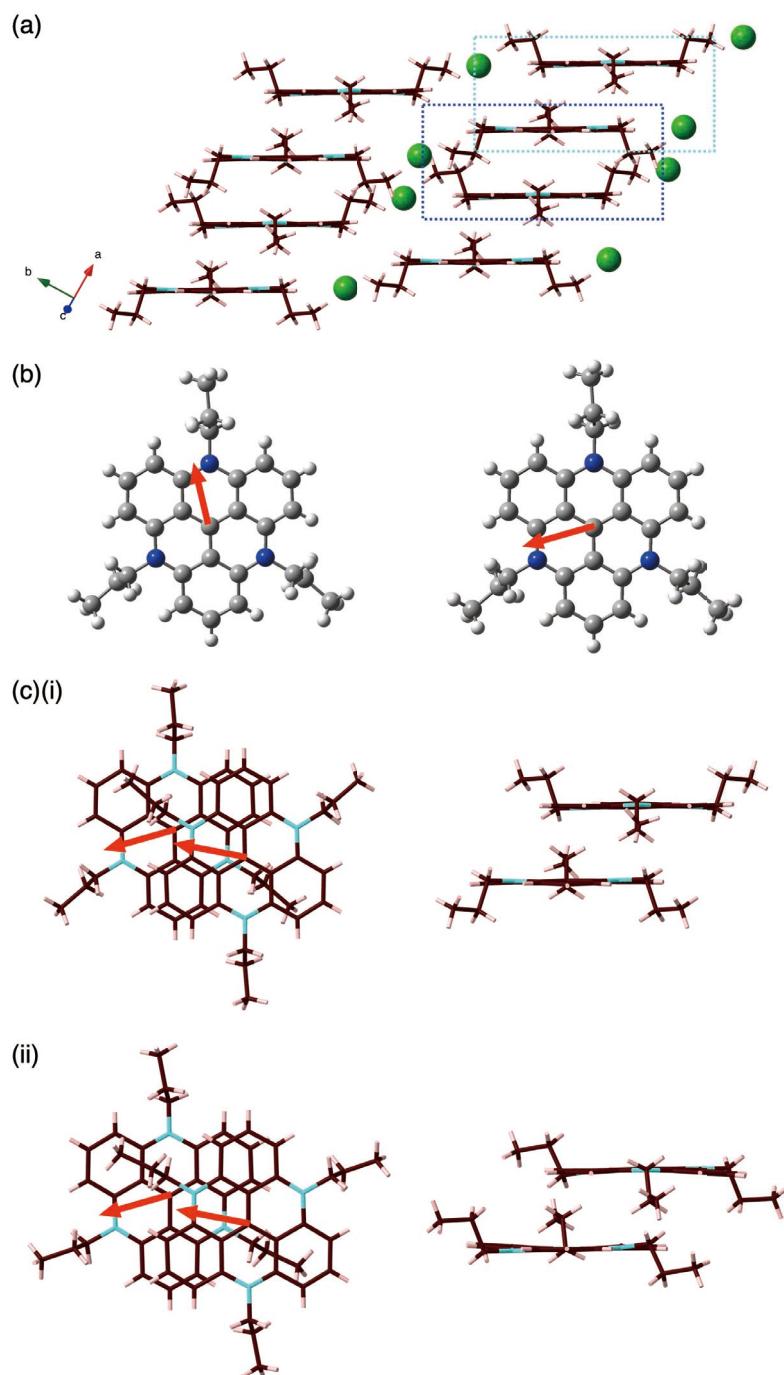

**Fig. S86** Evaluation of the transition dipole moments for the solid-state TATA<sup>+</sup>-Cl<sup>-</sup>:<sup>[S4]</sup> (a) packing structure of TATA<sup>+</sup>-Cl<sup>-</sup>, (b) ground-to-excited-state transition dipole moments of TATA<sup>+</sup> for 456 and 450 nm (state 1 (left) and 2 (right) for HOMO-to-LUMO and HOMO-1-to-LUMO transitions, respectively) estimated by TD-DFT calculation at B3LYP/6-31+G(d,p) of the crystal structure, and (c) slipped-stacking structures of TATA<sup>+</sup> extracted from (i) the cyan boxed area and (ii) the blue boxed area in (a). In (c), red arrows indicate representative transition dipole moments with a consideration of the symmetry of structures as TATA<sup>+</sup> has a centrosymmetric structure with six directions of symmetrical units. Therefore, the transition dipole moments of TATA<sup>+</sup> in state 2 can be superimposed on the slipped-stacking dimeric structures with the approximate offset angles of ~50° (i) and ~40° (ii). In contrast, the transition dipole moments of TATA<sup>+</sup> in state 1 are canceled out in the dimeric structure with the anti-parallel arrangement. Similar to the discussion in Fig. S83, such head-to-tail-arranged transition dipole moments of TATA<sup>+</sup> induced red-shifted absorption bands for TATA<sup>+</sup> in the solid-state absorption spectrum of TATA<sup>+</sup>-Cl<sup>-</sup> (Fig. S96e).

**Cartesian Coordination of 2-h-a**

-3246.3261893 hartree

C,1.18602339,-4.0558665067,0.0346791158

C,-1.2315336763,1.6356995826,-0.025831118

C,-3.4846276035,1.3641621439,-0.0937542239

C,-2.8626474224,0.0701147139,-0.0669863658

C,-2.8466559098,-2.4316564386,-0.0024788728

C,-2.6007527036,-4.6681747105,0.1380966389

C,-1.331257243,-3.9704525668,0.074875096  
C,1.272496332,1.5469076266,0.0492473705  
C,2.5603832728,2.2412588364,0.0772349571  
C,2.8149526719,-2.4976079689,0.0128314062  
C,3.4304171441,-3.7820247788,-0.0745177903  
C,2.8014881036,0.0030562094,0.0496036515  
H,4.4919354747,-3.9561325474,-0.1600734389  
H,2.705259617,3.3115041021,0.084026553  
H,-4.5496832539,1.5346029224,-0.1325652623  
N,-1.497964177,-2.6175236862,-0.0067825694  
N,1.4632311596,-2.7091399806,0.0739851104  
N,-1.50327332,0.2912282196,-0.0337831694  
N,1.4442434779,0.1969015159,0.039083244  
C,-2.5000893567,2.3104020116,-0.0619047031  
H,-2.6271873534,3.3820673266,-0.0573473261  
C,-3.553121805,-3.703099465,0.085931165  
H,-4.6248660177,-3.8344784963,0.1197085963  
C,2.4359717667,-4.7320267208,-0.0628028953  
C,3.510064093,1.2812135599,0.0814605823  
H,4.5816104466,1.4137175932,0.1101682364  
C,-0.0947451246,-4.6363666769,0.0883947515  
C,3.4531140634,-1.2373290642,0.0253978716  
C,-3.4965511801,-1.174097444,-0.0526056312  
C,0.0372931606,2.2298099028,0.017877987  
H,-2.7267676518,-5.737852764,0.2134934964  
H,2.5820863002,-5.8001294357,-0.1540596003  
C,-4.9917609047,-1.1646765857,-0.0786260624  
C,-5.7443183741,-0.7469794289,1.0243699817  
C,-5.7034372727,-1.583217106,-1.2084082369  
C,-7.1371916133,-0.7397202737,1.009951708  
C,-7.0957034486,-1.5908995387,-1.2445421946  
C,-7.8147636589,-1.1657048251,-0.1298422157  
C,0.0658891661,3.7260188894,0.0280239944  
C,0.3777142617,4.4437863101,1.1876300786  
C,-0.2172854786,4.4726017285,-1.1206194098  
C,0.4141091018,5.8360616251,1.2091552349  
C,-0.1946719034,5.8654785255,-1.1227758733  
C,0.12452901,6.5489739758,0.0480559397  
C,4.9473556236,-1.2569173678,0.0031262984  
C,5.6892608713,-1.7021882334,1.1033347315  
C,5.6720100647,-0.8396210109,-1.119300069  
C,7.08158977,-1.7323559255,1.0955339216  
C,7.0646297749,-0.8533419205,-1.1483059563  
C,7.7715928201,-1.3035620913,-0.0358886739  
F,-5.0448257502,-1.9937521911,-2.2994957082  
F,-7.7440835461,-1.9957839171,-2.341973351  
F,-9.1495736996,-1.1653263362,-0.1544888881  
F,-7.8248443984,-0.333666002,2.0830347341  
F,-5.1269307029,-0.3350329502,2.1400189706  
F,0.6591715226,3.7906303539,2.3226523994  
F,0.7169819388,6.4903989355,2.3358363092  
F,0.1523160515,7.8838301935,0.0577307924  
F,-0.4704986757,6.5475370294,-2.2399793524  
F,-0.5264729211,3.8481298207,-2.2649683629  
F,5.0275179618,-0.4075692067,-2.2107366138  
F,7.7246400816,-0.4467552748,-2.2381854247  
F,9.1062818817,-1.3248804307,-0.0542588836  
F,5.059549289,-2.1184579477,2.210627146  
F,7.7573999617,-2.1628123163,2.1666937152  
O,-0.186468943,-5.9979037175,0.1312086848

H,0.6656002535,-6.3782412567,0.3779260915  
H,0.771374847,-1.9679088916,0.1179730864  
H,-0.8042656375,-0.4429676566,-0.0264494051

#### Cartesian Coordination of 2-h-b

-3246.327678 hartree  
C,-1.1966368159,-4.0447446405,-0.0406172101  
C,1.2323900924,1.6327011607,-0.0286756098  
C,3.486361133,1.3579748634,-0.0508907255  
C,2.8623787788,0.0636948557,-0.0284543205  
C,2.8426527517,-2.4393798946,0.0273928319  
C,2.593663524,-4.6752222312,0.1280440981  
C,1.3224537246,-3.9840039623,0.0239689646  
C,-1.2725032993,1.5493912623,0.0167816896  
C,-2.5592310253,2.2459339508,0.0403245637  
C,-2.8222666381,-2.4927323476,-0.0131304958  
C,-3.4380699626,-3.7803689482,-0.0873366818  
C,-2.8041861228,0.0079008804,0.0256997748  
H,-4.5022077425,-3.9542419774,-0.1343992514  
H,-2.7025610244,3.3163961429,0.0415839277  
H,4.552169704,1.527004665,-0.0708194367  
N,1.4973756668,-2.6298474559,-0.0273538511  
N,-1.4690384542,-2.6992267816,0.0167354527  
N,1.5022545032,0.2876135331,-0.0234071267  
N,-1.4459543258,0.200421179,0.0113556573  
C,2.5033365439,2.3051951969,-0.0457058934  
H,2.6317943146,3.3767174579,-0.0466269771  
C,3.5466829049,-3.7064426356,0.1291478755  
H,4.615187494,-3.8399378832,0.2144464737  
C,-2.4428065295,-4.7281450665,-0.1056387494  
C,-3.5103885713,1.2871849313,0.0519374745  
H,-4.5817282484,1.4212760659,0.0809638833  
C,0.0766571731,-4.6378494028,-0.026910523  
C,-3.45751769,-1.2315188856,0.0090303437  
C,3.4949279337,-1.1790825208,0.0016696333  
C,-0.0347382433,2.2298767837,-0.0077075411  
H,2.7696230041,-5.7399281311,0.226736669  
H,-2.5475577564,-5.8006932158,-0.1607811327  
C,4.989909636,-1.1712656653,0.0155013922  
C,5.7319603742,-1.6040233675,-1.0894686934  
C,5.7138152141,-0.7397004557,1.1326836583  
C,7.1245990626,-1.612207281,-1.0888068823  
C,7.1066438849,-0.7320908628,1.1546577161  
C,7.814175578,-1.172359096,0.0387607329  
C,-0.0599815219,3.7261882102,-0.0093149789  
C,0.2366281455,4.4626679555,-1.1610740666  
C,-0.3816620879,4.4542556381,1.1411649879  
C,0.2172199684,5.8555180097,-1.1749594064  
C,-0.4152164362,5.8467282732,1.1508185454  
C,-0.1122919809,6.5493621277,-0.0131340557  
C,-4.9523735589,-1.2481188413,0.001913587  
C,-5.6865422982,-0.8489176811,-1.1204782858  
C,-5.683338903,-1.6744229499,1.1164845969  
C,-7.0793052426,-0.8623206803,-1.1365238287  
C,-7.0757784176,-1.7033282629,1.1220642698  
C,-7.7759308249,-1.2933583533,-0.010096208  
F,5.068139088,-0.3144950578,2.2269557776  
F,7.7657870701,-0.3128081456,2.240317264  
F,9.1490845232,-1.1722896254,0.0494293191  
F,7.8014439366,-2.0314234086,-2.1635459678

F,5.1028614155,-2.0288244236,-2.1928587838  
 F,0.5563495551,3.8280867779,-2.2969938166  
 F,0.5062200842,6.5277614831,-2.2948211436  
 F,-0.1369994841,7.8843337155,-0.0147601765  
 F,-0.7277460757,6.5110385696,2.2689974755  
 F,-0.6758427132,3.8111405264,2.2786627641  
 F,-5.042999199,-2.0721893381,2.2240119546  
 F,-7.7420265371,-2.1147229803,2.2064994949  
 F,-9.1108388511,-1.3136937482,-0.0155506093  
 F,-5.0512299268,-0.4348901509,-2.224410386  
 F,-7.7491791558,-0.4729700039,-2.2268348527  
 O,0.0245181567,-5.9997192735,-0.0532113806  
 H,-0.7812658648,-1.9542089198,0.0442708778  
 H,0.8002235038,-0.443272217,-0.0223099729  
 H,0.9095250859,-6.3533264452,-0.2063547063

#### Cartesian Coordination of 2-h-c

-3246.3117381 hartree

C,1.256020828,-4.1936429402,-0.0135446926  
 C,-1.2611365606,1.6527734853,0.0276889965  
 C,-3.4653270383,1.2493093444,0.1317880974  
 C,-2.68540839,0.0115167924,0.0471556406  
 C,-2.6663754466,-2.5361178407,-0.024628865  
 C,-2.5272488715,-4.7967887391,-0.1078401971  
 C,-1.231870798,-4.1552038312,-0.0591641278  
 C,1.2104573665,1.7274419753,-0.0345231165  
 C,2.5162695621,2.3151871934,-0.1049599745  
 C,2.7454759843,-2.4962834308,0.0002738697  
 C,3.4610954031,-3.7333514662,0.0591513548  
 C,2.7274934225,0.0442976722,-0.0367163625  
 H,4.5347861049,-3.8206950731,0.1147441982  
 H,2.7155359099,3.3746120038,-0.1609082923  
 H,-4.5406941872,1.3178721019,0.2024047963  
 N,-1.3340672627,-2.7961774305,-0.0141902229  
 N,1.4124277608,-2.8222820574,-0.0392256253  
 N,-1.3486723913,0.3003725803,-0.006169195  
 N,1.3852739586,0.3594089734,0.0008196687  
 C,-2.5779255216,2.2706576739,0.1191178718  
 H,-2.7856863727,3.3291193756,0.1803338016  
 C,-3.4298465001,-3.7824569292,-0.0862482191  
 H,-4.5060816928,-3.8665954535,-0.1174378676  
 C,2.5526937897,-4.766357249,0.0499365502  
 C,3.4302035412,1.3031419725,-0.105271495  
 H,4.5034056684,1.3995673899,-0.1604390709  
 C,0.0013426884,-4.8283114597,-0.0506834129  
 C,3.3421442579,-1.2114049317,-0.0187829324  
 C,-3.2827232215,-1.2586526493,0.0232760149  
 C,-0.0330904363,2.3606260785,-0.0077733396  
 H,-2.7066631823,-5.8609316948,-0.15324394  
 H,2.7932303042,-5.8201671639,0.1014482276  
 C,-4.7854712745,-1.2730080516,0.0517835572  
 C,-5.4890831882,-1.5578746447,1.2251816584  
 C,-5.540897402,-1.0089366063,-1.0938798768  
 C,-6.8813448615,-1.5796173596,1.2649911983  
 C,-6.9340314396,-1.0230636228,-1.0795906863  
 C,-7.6057148524,-1.310292361,0.1061670944  
 C,-0.0558964503,3.8510506515,-0.0134414454  
 C,0.4453494116,4.600131529,1.0581830487  
 C,-0.5866802503,4.5709720717,-1.0911296876  
 C,0.4254792391,5.9927155527,1.0629594342

C,-0.6249297572,5.9629227618,-1.1053961432  
 C,-0.1145485354,6.6763893647,-0.0234427036  
 C,4.8407815814,-1.2046767807,-0.0205339645  
 C,5.5724157218,-0.9132835278,1.1356230721  
 C,5.5714309081,-1.4952539842,-1.1775325159  
 C,6.9656054232,-0.9047129681,1.1460130556  
 C,6.9643069755,-1.4987026141,-1.1910359525  
 C,7.6628677144,-1.2003103815,-0.0231541078  
 F,-4.926823972,-0.7291825252,-2.2509659724  
 F,-7.6277824672,-0.7665584427,-2.1945871065  
 F,-8.9411291571,-1.3273365611,0.1324798047  
 F,-7.5249436343,-1.8536095073,2.4056507794  
 F,-4.822775484,-1.8223044857,2.3568857695  
 F,0.9661724722,3.9790185747,2.1257160538  
 F,0.9126419863,6.6745588434,2.1056038087  
 F,-0.141353088,8.0111172056,-0.0286746987  
 F,-1.1365609525,6.6170206924,-2.1537724324  
 F,-1.0768916241,3.9204181509,-2.1541121933  
 F,4.9305053193,-1.7860233123,-2.3170111211  
 F,7.6322977022,-1.7804563853,-2.3147665736  
 F,8.9974474742,-1.1981070149,-0.0246332877  
 F,4.9337144563,-0.6269187981,2.2769223064  
 F,7.6347051687,-0.6213931495,2.2684648657  
 O,-0.0707794721,-6.1858463238,-0.0691709339  
 H,0.8111551443,-6.567645168,-0.161149161  
 H,0.5615517042,-2.2500712405,-0.0697701107  
 H,0.5391827829,-0.2192578539,0.0366560285

#### Cartesian Coordination of 2-h-d

-3246.3136484 hartree

C,-1.2655087806,-4.1785397935,-0.0145769795  
 C,1.2605518878,1.6466353656,-0.0329203141  
 C,3.465508999,1.2429863474,-0.1312846523  
 C,2.6853819225,0.0049143293,-0.0461347608  
 C,2.6647200363,-2.543101811,0.0220211521  
 C,2.5224776874,-4.8014793384,0.0976074749  
 C,1.2241676865,-4.1642201226,0.0332025633  
 C,-1.2115610802,1.7291230825,0.0273209283  
 C,-2.5162759239,2.320632315,0.0971077914  
 C,-2.7547719137,-2.4891653496,-0.0040721416  
 C,-3.4676987869,-3.7303242101,-0.0542281174  
 C,-2.7335278574,0.0499331775,0.0358040622  
 H,-4.5424089597,-3.8181807099,-0.0897390126  
 H,-2.7127774068,3.3807360522,0.1496028715  
 H,4.5409760434,1.3115730082,-0.200584682  
 N,1.3350156905,-2.8049794437,-0.0053168478  
 N,-1.4197661938,-2.8087228345,0.0168923819  
 N,1.3471796468,0.2948468217,0.0034349385  
 N,-1.3900779155,0.3620768542,-0.0048074941  
 C,2.5783567739,2.2639642735,-0.1232076907  
 H,2.7863802413,3.3222199702,-0.1867557146  
 C,3.4264987358,-3.7856512872,0.0914102923  
 H,4.5016320339,-3.8734420133,0.1420158468  
 C,-2.5566456104,-4.7603652458,-0.0596435528  
 C,-3.4326206161,1.3109615411,0.1016044066  
 H,-4.5056184745,1.4100489283,0.1565510844  
 C,-0.0189071837,-4.8240828979,0.0041828409  
 C,-3.3502640613,-1.2043153636,0.0218421039  
 C,3.2827771534,-1.2631392759,-0.0194070277  
 C,0.0338980456,2.3583605855,-0.0000024282



H,2.7487491069,-5.8596855827,0.1573470525  
H,-2.7531718559,-5.8211585572,-0.0938879369  
C,4.7853339089,-1.2789410775,-0.0374457691  
C,5.4973526144,-1.5801941494,-1.2019157418  
C,5.5336401622,-1.0000179369,1.1096867201  
C,6.8898121875,-1.6031920598,-1.2321126187  
C,6.9268742306,-1.0146985705,1.1048602844  
C,7.6065625876,-1.3182270683,-0.0722644122  
C,0.0610346274,3.8486660483,0.0036591026  
C,-0.4383118139,4.5978644515,-1.0688234369  
C,0.5933817434,4.5687791569,1.0804880103  
C,-0.4151464341,5.9903985839,-1.0752221584  
C,0.635254753,5.9606219637,1.0930763353  
C,0.1265667231,6.6740869298,0.0103269571  
C,-4.8489828577,-1.1958552986,0.0353785208  
C,-5.5892903825,-0.918255908,-1.1183698312  
C,-5.5697832888,-1.4731823737,1.2015567114  
C,-6.9824865862,-0.9105279867,-1.1180136556  
C,-6.9625145001,-1.4765984717,1.2259765917  
C,-7.6702587874,-1.192522509,0.0600700925  
F,4.9125270281,-0.7054866191,2.2591676338  
F,7.6131425326,-0.7440543418,2.2210357568  
F,8.9420238863,-1.3365325536,-0.08915666  
F,7.5407360662,-1.8932587333,-2.364648129  
F,4.8388657731,-1.8601825243,-2.3346606792  
F,-0.9606732476,3.9768112074,-2.1356600118  
F,-0.9005977455,6.6721890503,-2.1187157453  
F,0.1567417879,8.0087701286,0.0139287521  
F,1.1486363611,6.6146838085,2.140666677  
F,1.0821937604,3.9182797801,2.1442522034  
F,-4.919460197,-1.749682871,2.3390013518  
F,-7.6217371904,-1.7447584808,2.358103851  
F,-9.0048333169,-1.1902759945,0.0721983197  
F,-4.9591786366,-0.6443154665,-2.2676044084  
F,-7.6605260582,-0.640123772,-2.2383711679  
O,-0.0965421036,-6.1802508034,-0.0023033456  
H,-0.5740132836,-2.2323470626,0.0413762554  
H,-0.5458024471,-0.2187263063,-0.0355236959  
H,0.7920870732,-6.5548379851,-0.0563590985

#### Cartesian Coordination of 2-h-e

-3246.3168991 hartree

C,7.9225933275,-1.2318351521,-0.1372801854  
C,7.2332670213,-1.7167135381,0.9717094803  
F,9.2573468983,-1.243493887,-0.1535938784  
F,7.9104225781,-2.1886216968,2.0240195871  
C,7.214980677,-0.7332323129,-1.2282038204  
F,7.8736917999,-0.2699058708,-2.2960323922  
C,0.0027090006,-4.451454206,-0.0532859359  
C,1.2816345372,-3.8493349112,-0.0671210588  
C,2.5035720829,-4.6394707485,-0.0872484788  
C,3.5279963005,-3.7488079357,-0.1145708183  
C,2.914670097,-2.4309877543,-0.09613227  
C,3.6070941379,-1.1984822694,-0.086575229  
C,2.9676724555,0.0447671619,-0.0495776309  
C,3.5453493849,1.3493997182,0.0255788673  
C,1.2741371817,1.5445307403,0.0338296783  
C,0.0023146679,2.1473738659,0.0772421286  
C,-1.2673918632,1.5436056023,0.068895929  
C,-2.5168531407,2.2593281159,0.085772251

C,-3.5398761659,1.3539440736,0.0679648773  
C,-2.9654418172,0.0442860384,0.0320270523  
C,-3.6075805853,-1.1944684796,-0.0121329111  
C,-2.9146755918,-2.4304776318,-0.0508129498  
C,-3.5310565176,-3.7349192675,-0.1945163499  
C,-2.5089053965,-4.63132986,-0.2155836157  
C,-1.2816967516,-3.8582796714,-0.0801333907  
C,5.0985646682,-1.2064541469,-0.1018429653  
C,5.8408585973,-1.6956177357,0.9796618429  
C,0.0027066423,3.6455620173,0.1385777363  
C,-0.2335130883,5.719013017,1.4067422678  
C,-0.2282361647,4.3276868239,1.3375208752  
C,-5.0982224318,-1.2072007795,-0.0300229442  
C,-7.2222289279,-0.7110382705,-1.1333013063  
C,-7.9232645147,-1.2529116104,-0.0588923388  
C,-7.2270695176,-1.7725703745,1.029858071  
C,-5.8349208277,-1.7421471153,1.0341417014  
F,5.2137778256,-2.1597215014,2.0680655269  
F,-0.459350401,6.3412681737,2.5687255144  
F,-0.459628144,3.6407208933,2.4636270731  
F,-9.2578470261,-1.2733549626,-0.0719611156  
F,-7.897532427,-2.2874065741,2.0661978031  
F,-5.20130251,-2.2424469323,2.1027170123  
H,2.552230671,-5.7178043577,-0.0854292001  
H,4.5868443535,-3.9614996516,-0.1477100465  
H,-2.6043105742,3.3344775701,0.0998467385  
H,-4.5981160537,1.5665583389,0.0788530321  
H,-4.5869745999,-3.9395992667,-0.297803508  
N,1.5545852898,-2.5196995377,-0.0772883942  
N,1.5959463133,0.2104991456,-0.0463661278  
N,-1.5923708168,0.2074356868,0.037015977  
N,-1.5599818844,-2.530771606,0.0114121877  
O,0.071905927,-5.8136220951,-0.0395765703  
C,2.5231951456,2.2568434215,0.0772538475  
C,5.8225078636,-0.727949731,-1.2002583411  
C,0.2337620392,4.4235594798,-1.0006043293  
C,0.2393427114,5.8160279878,-0.9559371713  
C,0.0031827095,6.4646312158,0.254062132  
C,-5.8296905602,-0.6975720895,-1.109712764  
F,5.1766984235,-0.2462555856,-2.2709544099  
F,0.4638298049,3.8310997582,-2.1790725898  
F,0.4637070979,6.5306147191,-2.0637154243  
F,0.0029057368,7.7981666914,0.3093553354  
F,-5.1920020077,-0.1764366259,-2.1670289651  
F,-7.8874072449,-0.2166945457,-2.183049574  
H,4.6042048439,1.55792817,0.0533871918  
H,2.6130273311,3.3293022268,0.1516690089  
H,-2.6136690186,-5.7000158928,-0.3622472751  
H,-1.0155127477,-0.6386692535,0.0518175521  
H,1.0198911137,-0.6366205881,-0.0794964663  
H,-0.8029999381,-6.1808816305,0.135450464

#### Cartesian Coordination of 2-h-f

-3246.3111442 hartree

C,7.9303412208,-1.139998905,-0.1708492614  
C,7.2547239273,-1.6417320238,0.9388708109  
F,9.2650624178,-1.1264773417,-0.1925688898  
F,7.9443105542,-2.1051560918,1.9872333027  
C,7.2085967115,-0.6531704634,-1.2579932884  
F,7.8544463399,-0.1764110045,-2.3276025293

C,-0.0024910038,-4.4967742205,-0.0216566327  
 C,1.2678641984,-3.9062429995,-0.0272043962  
 C,2.4952149085,-4.6404103054,-0.0047494264  
 C,3.5292332151,-3.7417898443,-0.0593455467  
 C,2.9653308651,-2.4293208729,-0.0949590103  
 C,3.6145987135,-1.1795848331,-0.1039361497  
 C,2.9181876686,0.0411047571,-0.0714327447  
 C,3.5402329113,1.3588126751,0.0045419861  
 C,1.2773554474,1.4659526888,0.0299375508  
 C,0.0055053271,2.0746894317,0.0945917233  
 C,-1.2707695946,1.4677328882,0.0959572014  
 C,-2.5115094482,2.2549832445,0.1238766428  
 C,-3.5346378524,1.3727730184,0.0960568061  
 C,-2.9207838396,0.0504895829,0.0470536736  
 C,-3.6200603375,-1.1653954981,-0.0110663024  
 C,-2.9729086631,-2.4179417811,-0.0497665528  
 C,-3.5379584436,-3.7167771936,-0.2034881282  
 C,-2.505018092,-4.6224977049,-0.2188414972  
 C,-1.2776409191,-3.905568467,-0.0663374629  
 C,5.1049996349,-1.1696216309,-0.1251153889  
 C,5.8622453903,-1.6468394372,0.9515156911  
 C,0.0081079053,3.5760756831,0.1664576356  
 C,-0.2151358125,5.6405130155,1.4514607413  
 C,-0.2117134609,4.2497700056,1.3713058328  
 C,-5.1094581023,-1.1595316311,-0.0466587904  
 C,-7.2125652368,-0.6059705139,-1.1630742449  
 C,-7.9351628847,-1.151320709,-0.1046424301  
 C,-7.2604115122,-1.7029720313,0.9816811256  
 C,-5.8681328883,-1.6989287733,0.9997914853  
 F,5.2484695241,-2.1292166873,2.0414407563  
 F,-0.4292494193,6.2544026221,2.6210289022  
 F,-0.4335225902,3.5547624871,2.4952815696  
 F,-9.269693878,-1.1466593093,-0.1318026213  
 F,-7.9508156098,-2.2239586256,2.0020660721  
 F,-5.25496757,-2.232130997,2.0660438061  
 H,2.5522050305,-5.7166184595,0.0405017261  
 H,4.5854835282,-3.9638391207,-0.0673890494  
 H,-2.5781218177,3.3323535203,0.1488534593  
 H,-4.593603989,1.5860339387,0.1110791313  
 H,-4.5900490168,-3.927401099,-0.3215905597  
 N,1.5991326764,-2.5697244128,-0.0878695717  
 N,1.5563643036,0.1384783302,-0.0574903547  
 N,-1.556563842,0.1406519225,0.057877482  
 N,-1.610310093,-2.5711434882,0.0305990168  
 O,0.0502991482,-5.8720614956,-0.0229295103  
 C,2.5226611462,2.2454530121,0.0696016734  
 C,5.8164377458,-0.6765209688,-1.2258645578  
 C,0.2283291489,4.362515847,-0.9680651191  
 C,0.2334752818,5.7547290418,-0.9138980852  
 C,0.0097757101,6.3950606124,0.3025350661  
 C,-5.8203409127,-0.6204103835,-1.1263085091  
 F,5.1579563929,-0.2076735724,-2.2935957143  
 F,0.447900713,3.7791677713,-2.1537480929  
 F,0.4469189604,6.4775544216,-2.0194374392  
 F,0.0102888284,7.7292203367,0.3677244324  
 F,-5.1624193104,-0.0985880308,-2.1695428166  
 F,-7.85778721,-0.0842283334,-2.211823819  
 H,4.6006711947,1.5644780504,0.0255976019  
 H,2.5956602871,3.3195353679,0.1525347855  
 H,-2.594430319,-5.6879215239,-0.3781086624

H,-0.7234001284,-6.2184871181,0.4393409156  
 H,-1.0432320293,-1.7177240799,0.1190947841  
 H,1.03571785,-1.70932429,-0.109003234

# **Cartesian Coordination of 2-o-a**

-3246.3260612 hartree  
 C,-1.1903400298,-4.1072252671,-0.1336230688  
 C,1.2229089389,1.6661726959,-0.1264671121  
 C,3.4667935285,1.3755095891,-0.3422173287  
 C,2.8622078874,0.0816846406,-0.1281206905  
 C,2.9061435218,-2.4103744997,0.1737002533  
 C,2.5274120982,-4.5921801745,0.6669309576  
 C,1.3470392177,-4.0556560687,0.1608505676  
 C,-1.2616917321,1.5242543055,0.1335944082  
 C,-2.5523479949,2.1995901298,0.2425375432  
 C,-2.8100343856,-2.5407054609,-0.0890183285  
 C,-3.41185141,-3.7869429952,-0.3753408683  
 C,-2.7814792808,-0.0392937671,0.1648774079  
 H,-4.4649266071,-3.9400324754,-0.557366226  
 H,-2.70914103,3.2674010203,0.2748650891  
 H,4.5237509412,1.5334153033,-0.4945804959  
 N,1.5769486172,-2.7092036901,-0.1053101327  
 N,-1.4595748064,-2.7675782793,0.0378468617  
 N,1.4932274615,0.3166635651,-0.0462839975  
 N,-1.4083546398,0.1791489478,0.1153056655  
 C,2.4909719032,2.3228443117,-0.3319894353  
 H,2.6168132284,3.3874910785,-0.4563157928  
 C,3.4917279441,-3.5812711482,0.679746281  
 H,4.5031081606,-3.6539494172,1.0511896153  
 C,-2.408719763,-4.7483420544,-0.4005726538  
 C,-3.4915640536,1.2285636709,0.2706878077  
 H,-4.5619126274,1.3497925526,0.3472931193  
 C,0.0965265746,-4.7991374152,-0.011110627  
 C,-3.4282553091,-1.2648739067,0.0504419772  
 C,3.520353015,-1.1285202999,0.0019642255  
 C,-0.0339187651,2.2435511627,-0.0032846904  
 H,2.6242039197,-5.6115824299,1.0086551637  
 H,-2.4969599218,-5.8072130395,-0.5893450672  
 C,5.0108580414,-1.1174843513,0.0194039009  
 C,5.7502415158,-1.7595377912,-0.9831879727  
 C,5.7389889206,-0.4995318335,1.044079157  
 C,7.1418603996,-1.7835810129,-0.9759740666  
 C,7.1317258951,-0.5064397927,1.0691565979  
 C,7.8348082925,-1.1530428406,0.055628626  
 C,-0.0957377184,3.7364667259,-0.0450358256  
 C,0.1023418716,4.448407018,-1.2331674976  
 C,-0.3581674089,4.4900530953,1.1045808742  
 C,0.0472479714,5.8395920826,-1.2822554425  
 C,-0.4291564731,5.8806861772,1.0799784389  
 C,-0.2227459276,6.5577410122,-0.1199561189  
 C,-4.9237327855,-1.2826799687,0.0372131057  
 C,-5.6592071494,-0.7975989723,-1.0495320149  
 C,-5.6491847468,-1.815041345,1.1090260723  
 C,-7.0517577398,-0.8278021123,-1.069884018  
 C,-7.0409867678,-1.857604752,1.1102068697  
 C,-7.7440366653,-1.3612725821,0.0146098197  
 F,5.0990763211,0.120754093,2.0444878643  
 F,7.794498905,0.0928794412,2.0636228749  
 F,9.1685338672,-1.1663110522,0.0705546194  
 F,7.8154883042,-2.3962665546,-1.9543231443

F,5.1168197247,-2.3641278337,-1.9956642128  
 F,0.3645735083,3.790888077,-2.371700215  
 F,0.2450539845,6.48665905,-2.4360268961  
 F,-0.2815328278,7.8908427184,-0.1551307572  
 F,-0.6836256906,6.5679461078,2.1986662515  
 F,-0.5605162994,3.8707278588,2.2754006712  
 F,-5.00374105,-2.2952548157,2.1793112001  
 F,-7.7039085863,-2.3647893932,2.1545328216  
 F,-9.0780229037,-1.3951626034,0.0051206783  
 F,-5.0273676895,-0.2844309758,-2.1129856978  
 F,-7.7249010731,-0.3553059589,-2.1242318462  
 O,0.122919374,-6.0353839603,-0.0124505753  
 H,-0.8372630167,-2.0272905475,0.3327154047  
 H,0.7628252736,-0.3219091374,0.24046838  
 H,1.0469467476,-2.195552855,-0.797260355

#### Cartesian Coordination of 2-o-b

-3246.3246602 hartree

C,-1.2690248496,-4.0789650795,-0.2342268529  
 C,1.2586885584,1.6171602889,-0.1419737158  
 C,3.4882672223,1.2808495577,-0.4102636248  
 C,2.8760835938,0.0294600558,-0.1551531603  
 C,2.824460938,-2.4682825213,0.0876094444  
 C,2.5327252719,-4.6978406313,0.1966983722  
 C,1.2810464312,-3.9881965522,0.0734756032  
 C,-1.2374972645,1.6203676832,0.1237829605  
 C,-2.4883708426,2.2144432037,0.5015582671  
 C,-2.8604443109,-2.4813459768,-0.2337676475  
 C,-3.4658576864,-3.7130788285,-0.5688364602  
 C,-2.8684006668,0.0081925628,0.0818957426  
 H,-4.5125125566,-3.8412249362,-0.8012705506  
 H,-2.6050671255,3.2447218094,0.8024446254  
 H,4.541628625,1.4288835242,-0.5945987236  
 N,1.4436030163,-2.6554851114,0.0301010289  
 N,-1.515204313,-2.7400406496,-0.0600860912  
 N,1.5212530266,0.272693456,-0.0207377123  
 N,-1.4918320479,0.2586651511,-0.0821533708  
 C,2.5029348218,2.2485139827,-0.4086003779  
 H,2.629930713,3.3048167351,-0.5892332203  
 C,3.5020695215,-3.7449610322,0.211092412  
 H,4.5696288459,-3.8889524641,0.293068942  
 C,-2.4818083608,-4.6965695715,-0.5624022336  
 C,-3.4577454057,1.254867951,0.4740492806  
 H,-4.4941385707,1.374759634,0.7530232356  
 C,0.021628668,-4.7496525586,-0.0752951562  
 C,-3.4994508762,-1.2147080862,-0.0578337891  
 C,3.479526563,-1.240305527,-0.0399085454  
 C,-0.0063974593,2.2549090653,0.0169514126  
 H,2.6239550678,-5.7720466962,0.248053049  
 H,-2.5847132013,-5.7502906488,-0.7715785741  
 C,4.9756516721,-1.245309462,-0.0766364485  
 C,5.681027013,-1.7398286203,-1.1787830252  
 C,5.7285814782,-0.7468442494,0.9916533124  
 C,7.0733996297,-1.7460405036,-1.2184941643  
 C,7.1210955035,-0.7431866457,0.9739738831  
 C,7.7947921648,-1.2456032836,-0.1369565834  
 C,0.0018260512,3.7436226076,0.0967501129  
 C,-0.6089614128,4.5354308157,-0.8844228016  
 C,0.6253282278,4.4203530061,1.1538909627  
 C,-0.6058883857,5.9267985508,-0.822462335

C,0.6490494443,5.8102354282,1.2324663013  
 C,0.0285174804,6.5660300345,0.2399691576  
 C,-4.9896736347,-1.2243938037,-0.0105631405  
 C,-5.759773921,-0.5947009269,-0.9966514721  
 C,-5.6860672826,-1.8772330247,1.0156047137  
 C,-7.1521990826,-0.6088773948,-0.9690912726  
 C,-7.0771854059,-1.9077150411,1.0608142809  
 C,-7.8124807784,-1.2700417439,0.0636027628  
 F,5.1113768675,-0.2607346052,2.0763188945  
 F,7.8117068808,-0.2649187709,2.0140544188  
 F,9.1287838816,-1.2462275251,-0.1656145883  
 F,7.7189829737,-2.2215887104,-2.2881135054  
 F,5.020007732,-2.2202257101,-2.2384912202  
 F,-1.2212062147,3.9577815856,-1.9269718683  
 F,-1.1977508738,6.6498424554,-1.778836434  
 F,0.0405044133,7.8983701802,0.3082685527  
 F,1.2498760622,6.4218769221,2.2582911009  
 F,1.2201422014,3.7274365382,2.1331447696  
 F,-5.013544109,-2.4858848823,1.9992466688  
 F,-7.7098557718,-2.5319468971,2.0590892107  
 F,-9.1457227575,-1.2899104642,0.1001257563  
 F,-5.1614208157,0.042603785,-2.0119647875  
 F,-7.8555154888,-0.0000958148,-1.9293670379  
 O,0.0597745561,-5.9852906791,-0.1027280343  
 H,-0.7996632225,-2.115617722,0.2847810604  
 H,0.8947054279,-0.4701921173,0.2598297658  
 H,-0.9705198508,-0.2506221008,-0.7857985363

#### Cartesian Coordination of 2i-a

-3246.3112208 hartree

C,0.082836088,-3.7449082509,2.5046844497  
 C,-0.5432562561,1.6304838525,-0.510245232  
 C,-1.3954083722,1.1037702694,-2.5367256286  
 C,-1.1418420601,-0.0911244718,-1.8260053179  
 C,-1.2799437215,-2.5835252039,-1.528457295  
 C,-1.4689212074,-4.7411681592,-0.9076015874  
 C,-0.9762595106,-3.8908321152,0.1683154155  
 C,0.6317672764,1.8266323103,1.695329722  
 C,1.1917106977,2.5759178438,2.8128828498  
 C,1.3853976952,-2.1581073515,3.4000179094  
 C,1.2170285803,-3.155479763,4.362788977  
 C,1.6049597865,0.3688608874,2.9620110028  
 H,1.6486144087,-3.1441330972,5.3542312821  
 H,1.1113150272,3.6421459438,2.9667727795  
 H,-1.8109520971,1.161707539,-3.5307929842  
 N,-0.8526057293,-2.6232777567,-0.190608938  
 N,0.7009474686,-2.5301339556,2.2880029116  
 N,-0.6257291843,0.2653859855,-0.6067028853  
 N,0.9093200027,0.4563376021,1.8498055906  
 C,-1.0342387017,2.166123126,-1.7213114557  
 H,-1.0917238993,3.2167831099,-1.9608260427  
 C,-1.6390372561,-3.9257102257,-1.9756904747  
 H,-1.9839333057,-4.1914953563,-2.9642898608  
 C,0.4027159742,-4.1511023923,3.8006239704  
 C,1.8139372594,1.6642217296,3.6013148656  
 H,2.3565387956,1.8312524463,4.5226145477  
 C,-0.709882485,-4.4647937503,1.525096295  
 C,2.2055408093,-0.9037223138,3.5235449792  
 C,-1.4047499664,-1.4288821462,-2.2709372416  
 C,-0.0221206436,2.362397902,0.6086014325

H,-1.6454213011,-5.8023046781,-0.8173114378  
H,0.0640333024,-5.0711835137,4.2527348172  
C,-1.8997049631,-1.5469066218,-3.6791695456  
C,-3.2332608446,-1.8538337515,-3.9664140218  
C,-1.0416265297,-1.340674317,-4.7640524377  
C,-3.6967243279,-1.9600049006,-5.2760156441  
C,-1.4829349468,-1.4408572966,-6.0808527924  
C,-2.816940147,-1.7522013908,-6.3358518575  
C,-0.1885806856,3.8473918799,0.5402739852  
C,0.899802916,4.701373816,0.33379576  
C,-1.4500012888,4.4384294943,0.6704423197  
C,0.7462549884,6.0844954894,0.267906378  
C,-1.6267631699,5.8180491003,0.6085117322  
C,-0.5221741716,6.6431909647,0.4064451033  
C,3.6437827383,-1.0634493261,3.0062792137  
C,4.72385401,-0.9036874054,3.8774228879  
C,3.951419631,-1.3602323398,1.6761260188  
C,6.0459932922,-1.0429202611,3.4637290935  
C,5.2637531915,-1.505985303,1.2341665155  
C,6.3164157823,-1.3468281774,2.1325958796  
F,0.2454729874,-1.0408757931,-4.5485414315  
F,-0.6375566243,-1.2436834147,-7.0968174756  
F,-3.2500578721,-1.8509269624,-7.5933531029  
F,-4.9773677089,-2.2539986108,-5.519237765  
F,-4.1054694164,-2.0533448093,-2.9714710569  
F,2.1316146948,4.198037982,0.1884809898  
F,1.8053208755,6.8745443468,0.068223445  
F,-0.6795309805,7.9659560506,0.3464891065  
F,-2.8434337595,6.3530553131,0.7452288934  
F,-2.5286603995,3.6710725954,0.8690919833  
F,2.9716662099,-1.515222775,0.7727333508  
F,5.5178043993,-1.7935178174,-0.0464679168  
F,7.5780293063,-1.4828212664,1.7184692288  
F,4.5030687014,-0.5982962295,5.1705716092  
F,7.0500326216,-0.8835988655,4.3324619025  
O,-1.1722919905,-5.5822852062,1.769001997  
H,0.6065764722,-1.9859536628,1.4411728902  
H,-0.3517867802,-0.3841311526,0.1238892923  
H,2.3117524442,-0.7356303915,4.5977024156

#### Cartesian Coordination of 2i-b

-3246.2855023 hartree  
C,7.0921279997,-1.7023215287,1.4025052558  
C,6.080289479,-1.3268918925,2.2841378289  
F,8.3484719105,-1.8087541188,1.8350505937  
F,6.3690390606,-1.0777389913,3.5642006022  
C,6.7891263975,-1.9664409951,0.0685748513  
F,7.759149713,-2.3197059236,-0.7790490193  
C,-0.3996940714,-4.4270487078,-1.874752695  
C,0.8243493498,-3.8883354314,-1.2221274442  
C,1.956075309,-4.6899438871,-0.8927732728  
C,2.9044281506,-3.8598532592,-0.3555050714  
C,2.3804355692,-2.5205913276,-0.3651598262  
C,3.0239903072,-1.3486510553,0.0111611566  
C,2.4794745078,-0.0315834717,-0.0450156049  
C,3.2667119968,1.1693938201,0.1596347496  
C,1.1182580801,1.6301978611,-0.3042268995  
C,-0.0608327797,2.3837877491,-0.4975159102  
C,-1.3486697829,1.8905298603,-0.7259032974  
C,-2.559322287,2.6377503578,-0.8257651272

C,-3.5965888432,1.7457081827,-1.0011906459  
C,-3.0353326694,0.4456870658,-1.0252315296  
C,-3.7899220857,-0.8346295617,-1.1905081187  
C,-3.0583548981,-2.0804870416,-1.6253711877  
C,-3.7616512753,-3.1624709578,-2.2425737073  
C,-2.8263560152,-4.1546656303,-2.4317829178  
C,-1.6031424394,-3.6418868449,-1.9176317851  
C,4.4347281366,-1.480806017,0.4883890244  
C,4.7717248448,-1.2186310575,1.8212227661  
C,0.0599626819,3.8754389056,-0.4307827752  
C,0.3820924869,5.9239915669,0.8524970256  
C,0.2642049383,4.5379816873,0.7834918088  
C,-4.6178252346,-1.1193324973,0.0734151049  
C,-6.7741635664,-1.6050930508,1.1114332233  
C,-6.1598246419,-1.7414284762,2.3530485228  
C,-4.7810798037,-1.5698413026,2.4646680896  
C,-4.0308776819,-1.2679719641,1.3323228547  
F,3.8209717819,-0.859461333,2.6913097906  
F,0.5745226381,6.5301515431,2.0271668675  
F,0.3501774252,3.837784507,1.9206970755  
F,-6.8876139145,-2.032032228,3.4342014065  
F,-4.1886070707,-1.6948546546,3.6568013336  
F,-2.707339063,-1.1061720934,1.4742903196  
H,1.9950300627,-5.7539271797,-1.0658115212  
H,3.8804824836,-4.1335385834,0.015854349  
H,-2.6280705556,3.7129859474,-0.7618582966  
H,-4.6485069008,1.9675701059,-1.1092491418  
H,-4.8149563721,-3.1737247064,-2.4937204906  
N,1.0997711465,-2.612242288,-0.8967185073  
N,1.1851217349,0.2633801007,-0.3289594506  
N,-1.7075672221,0.5522152654,-0.8590593708  
N,-1.7606148392,-2.3508906455,-1.4222148527  
O,-0.3047500659,-5.5802892777,-2.3245981532  
C,2.4144355798,2.2131531433,-0.0172793577  
C,5.4729017802,-1.8533887489,-0.3727753305  
C,-0.0274217822,4.660985609,-1.5843231664  
C,0.0877419672,6.0484234829,-1.5388629593  
C,0.292933761,6.6805068416,-0.3143552169  
C,-5.9993727888,-1.2972828465,-0.0043725354  
F,5.2177365931,-2.1056881929,-1.6624385436  
F,-0.2229655939,4.0814562642,-2.7750446842  
F,0.0039201349,6.7719095068,-2.6587021844  
F,0.4033630837,8.0079073197,-0.2582120926  
F,-6.6237106541,-1.1804593427,-1.1919880851  
F,-8.0966739488,-1.7670850703,0.9953901445  
H,4.323109325,1.2116884369,0.379958043  
H,2.6449168251,3.2666343528,0.0379766543  
H,-2.9505875502,-5.1355140847,-2.8667614159  
H,-1.079109071,-0.2474336946,-0.8229773712  
H,-4.5315734968,-0.6256051927,-1.9698083193  
H,0.4358417231,-1.8481113288,-0.9870925599

#### Cartesian Coordination of 2i-c

-3246.2991655 hartree  
C,6.563292703,-1.4631794736,1.7061757128  
C,5.4072839377,-1.3521727741,2.4760535624  
F,7.7542551487,-1.5571651548,2.2999775918  
F,5.4925939703,-1.3411100619,3.8099227205  
C,6.4735113542,-1.4765281568,0.3163534627  
F,7.5828857845,-1.5764519617,-0.4226992307

C,-0.1557478049,-3.9948273212,-2.9802647356  
 C,0.964531276,-3.4961781067,-2.1172234732  
 C,2.1691500011,-4.2798783318,-1.8634433938  
 C,2.9336637041,-3.5165010437,-1.0471673115  
 C,2.2091181302,-2.2549150384,-0.8504414714  
 C,2.6960528406,-1.1484830928,-0.1897724373  
 C,2.0961322202,0.1733656677,-0.0878930534  
 C,2.8753665808,1.3582546048,0.2555304318  
 C,0.7430502229,1.8668283176,-0.2144740166  
 C,-0.4403048546,2.5804467678,-0.4253093779  
 C,-1.6911754199,1.9821440447,-0.7141554217  
 C,-2.9409676237,2.5619141569,-1.0217174925  
 C,-3.848850734,1.5207885643,-1.2094279607  
 C,-3.1587078972,0.3114612063,-1.0169237143  
 C,-3.7459612629,-1.080716842,-1.0660991366  
 C,-3.0664958622,-2.0678927712,-1.9862445585  
 C,-3.663860232,-2.870886482,-2.9600442975  
 C,-2.6641715723,-3.6974674585,-3.5046461753  
 C,-1.4717209638,-3.3822494972,-2.8560468357  
 C,4.0459007647,-1.2732394181,0.4513353428  
 C,4.170688011,-1.2541595154,1.8443990207  
 C,-0.4080772409,4.0695705775,-0.3448592397  
 C,-1.0789318389,6.1499780742,0.7422675483  
 C,-1.0975180255,4.7602926285,0.6589930121  
 C,-3.9762814506,-1.6495957654,0.343497591  
 C,-5.5466334393,-2.4158066456,2.0544892408  
 C,-4.4912155315,-2.7206895095,2.9094175993  
 C,-3.1807361101,-2.493620795,2.4946853657  
 C,-2.9446555463,-1.9660679756,1.2288529632  
 F,3.0759702168,-1.1447961907,2.6078483648  
 F,-1.7404061686,6.7788549406,1.7183354403  
 F,-1.7891161059,4.0846658525,1.585302427  
 F,-4.7325012305,-3.2262248328,4.1201707802  
 F,-2.1624361155,-2.7810918402,3.3099305798  
 F,-1.6600910037,-1.7619174397,0.8724209801  
 H,2.3638474632,-5.2643731564,-2.2624797732  
 H,3.8990500779,-3.7626627147,-0.6302516865  
 H,-3.1376784757,3.6203401972,-1.106327795  
 H,-4.8975526802,1.6033298142,-1.4572510367  
 H,-4.7128831964,-2.8552560184,-3.2223817454  
 N,0.9804341357,-2.3189899363,-1.5242980956  
 N,0.8249014806,0.4905327348,-0.349912118  
 N,-1.8724558421,0.6100651077,-0.7227880438  
 N,-1.7466691488,-2.3903676613,-1.9374100616  
 O,0.0625959015,-4.9369736107,-3.7419797989  
 C,2.0278971283,2.4179968226,0.1618791167  
 C,5.2244288607,-1.3789285927,-0.2936973273  
 C,0.3049548504,4.8367536233,-1.2736561555  
 C,0.3345632292,6.2277471138,-1.2099301741  
 C,-0.3602671361,6.8855516059,-0.1975468228  
 C,-5.2768564465,-1.8879070059,0.7943666747  
 F,5.1768197846,-1.3843724427,-1.6317249101  
 F,0.9738562657,4.2400596347,-2.2665780139  
 F,1.0185221453,6.9323174729,-2.1159232387  
 F,-0.3374912072,8.216838252,-0.1279402531  
 F,-6.3248829541,-1.6053671485,-0.0007011529  
 F,-6.8070087788,-2.6284767547,2.4446622951  
 H,3.9267612563,1.3808122753,0.5019061071  
 H,2.2521144033,3.4597502708,0.3407221288  
 H,-2.7686345589,-4.4494640864,-4.2724697373

H,-4.7451886397,-0.94746196,-1.4834591338  
 H,-1.0638850729,0.0072188866,-0.5447963755  
 H,-0.9903776776,-1.98105463,-1.392893277

#### Cartesian Coordination of 2i-d

-3246.275402 hartree  
 C,6.8684856359,-1.3114863606,1.3650553276  
 C,5.7841792912,-1.4672732986,2.2265277048  
 F,8.1116282979,-1.3665878591,1.8426735884  
 F,5.9913262652,-1.6715529518,3.5297243037  
 C,6.6530292551,-1.0977957965,0.0047532388  
 F,7.6920223133,-0.9463933359,-0.8205921618  
 C,-0.0850999048,-4.4498777587,-2.4782497068  
 C,1.0759064951,-3.805925129,-1.798048473  
 C,2.3503050391,-4.4104136591,-1.6117558627  
 C,3.1235328492,-3.5080519996,-0.9330225967  
 C,2.3459011384,-2.3099626278,-0.7178366977  
 C,2.8379314893,-1.1301634132,-0.1679857092  
 C,2.2339758466,0.1509901432,-0.0651024275  
 C,2.90064512,1.3402466419,0.3398236213  
 C,0.7850979154,1.8633257732,-0.2285603727  
 C,-0.4575413114,2.5538777755,-0.4529408395  
 C,-1.6295120936,1.9073825236,-0.764931354  
 C,-2.9514518737,2.4918687159,-0.9650508618  
 C,-3.7880196557,1.4464688035,-1.1661918286  
 C,-2.9587519996,0.2324233598,-1.1191817853  
 C,-3.5774419086,-1.1334959729,-1.2471796616  
 C,-2.8290243056,-2.2928964529,-1.8589925273  
 C,-3.526327712,-3.3187057161,-2.5777629636  
 C,-2.5786399687,-4.2571874529,-2.9283843737  
 C,-1.3496882708,-3.7732654906,-2.4059251647  
 C,4.2436994856,-1.1972427292,0.3575799443  
 C,4.4891355631,-1.4071595603,1.7170143487  
 C,-0.4454344087,4.0368868676,-0.2977192635  
 C,-1.13399815,6.0609121752,0.8799904655  
 C,-1.1411171287,4.6754090047,0.7352874304  
 C,-4.1600034411,-1.5074249303,0.1290639539  
 C,-6.110147215,-1.93296921,1.5407528848  
 C,-5.2816724372,-2.2405757473,2.6158268194  
 C,-3.8986593771,-2.1782629537,2.4601854933  
 C,-3.3553861509,-1.8125962388,1.2313030095  
 F,3.4640656825,-1.5573626792,2.5636810518  
 F,-1.8072218823,6.6401884541,1.8777743236  
 F,-1.8357434942,3.955046107,1.6243798834  
 F,-5.8097937594,-2.588870574,3.7922996381  
 F,-3.0991064077,-2.4633382326,3.4946184671  
 F,-2.0215656916,-1.7539851874,1.1327872143  
 H,2.5983112454,-5.4003485885,-1.9617584179  
 H,4.1503021637,-3.6315251288,-0.6236959425  
 H,-3.1903007751,3.5454181864,-0.9522372334  
 H,-4.8560229583,1.4645701781,-1.3404029395  
 H,-4.5884542566,-3.3325372369,-2.7898705704  
 N,1.090863931,-2.5650250979,-1.2701086653  
 N,0.9484979349,0.5163806632,-0.4035862574  
 N,-1.6996785449,0.5086088099,-0.8858487529  
 N,-1.5239674391,-2.5603718729,-1.7504542573  
 O,0.1248286464,-5.5381021637,-3.0341540452  
 C,2.0126382737,2.3937065667,0.2286385774  
 C,5.349111568,-1.0412923021,-0.4825147661  
 C,0.2703414694,4.8513779594,-1.1831088048



C,0.2931358451,6.2374239187,-1.0564940546  
 C,-0.4140388505,6.8434646719,-0.0198199434  
 C,-5.5413138483,-1.5690412347,0.323097519  
 F,5.1677435399,-0.8342134518,-1.7922028692  
 F,0.9546427213,4.2975595739,-2.1923185335  
 F,0.9804548673,6.9862911551,-1.9231644392  
 F,-0.4015478018,8.1699784743,0.1099731294  
 F,-6.3753137967,-1.264262213,-0.6907613355  
 F,-7.4397139866,-1.9820588156,1.6828838566  
 H,3.9314270839,1.3951586932,0.6534104891  
 H,2.2015651445,3.4315704994,0.4561739368  
 H,-2.7045725532,-5.1776552482,-3.4800267447  
 H,-4.4548524733,-0.9884856297,-1.8844678438  
 H,0.1205155043,-0.0402946639,-0.6517169081  
 H,0.1576552108,-2.0890427292,-1.2481352647

#### Cartesian Coordination of 2i-e

-3246.2714433 hartree

C,7.3424579366,-1.582363008,1.4081790937  
 C,6.3329469219,-1.1273337592,2.2540759946  
 F,8.5966835318,-1.6696448695,1.8520748269  
 F,6.6205293482,-0.7830167499,3.5127551751  
 C,7.0386706807,-1.944525643,0.0979166133  
 F,8.0069670863,-2.3724957297,-0.7169317672  
 C,-0.2273558967,-4.1204111015,-1.9415461416  
 C,0.9830645277,-3.6121592709,-1.2317328377  
 C,2.0653368879,-4.5560031296,-0.8956278599  
 C,3.0719473289,-3.8153927446,-0.3848748854  
 C,2.6045339574,-2.4285901578,-0.4173682884  
 C,3.2841381551,-1.2989384239,-0.020733559  
 C,2.6968690419,0.0125569305,-0.0741033198  
 C,3.3213200762,1.2673569102,0.1401952893  
 C,1.1295126246,1.5984498599,-0.3688499858  
 C,-0.1062875798,2.2535706305,-0.5417078227  
 C,-1.3967699419,1.7385672907,-0.7124028199  
 C,-2.5924359045,2.5272858962,-0.6897417286  
 C,-3.6732000741,1.6815828079,-0.7890895846  
 C,-3.157229266,0.369061344,-0.9029756158  
 C,-3.934879272,-0.8946296316,-1.0966010341  
 C,-3.1495076591,-2.1148846575,-1.5029165983  
 C,-3.7436188199,-3.2761719348,-2.0757151038  
 C,-2.695974815,-4.1408686478,-2.3165618809  
 C,-1.5167802579,-3.4789589021,-1.8707103925  
 C,4.6872979487,-1.3993716015,0.468451374  
 C,5.0273283112,-1.0426868936,1.7793509139  
 C,-0.0288383766,3.7541577504,-0.494991524  
 C,0.0380240065,5.8413092025,0.7606041665  
 C,-0.0338012812,4.4507986728,0.7159645132  
 C,-4.8135016915,-1.1772960965,0.1285759514  
 C,-7.0052279523,-1.6834495625,1.0782070649  
 C,-6.4429401053,-1.8006164867,2.3459663936  
 C,-5.0724655477,-1.6089431578,2.5151748776  
 C,-4.2789167538,-1.3075731153,1.4129264092  
 F,4.0778038854,-0.6086421991,2.6192078528  
 F,0.0302606941,6.4831149608,1.9317693883  
 F,-0.1086610632,3.7797742415,1.8715274519  
 F,-7.2130114475,-2.0913020233,3.3974499097  
 F,-4.5300467447,-1.7143353148,3.7328571397  
 F,-2.9651387899,-1.1253294533,1.6082981615  
 H,2.0068298343,-5.6214574404,-1.0581604064

H,4.027034694,-4.1519494857,-0.0082699859  
 H,-2.6171437328,3.6013299409,-0.5897866202  
 H,-4.7213461729,1.9433597606,-0.7935407066  
 H,-4.797638424,-3.4258478373,-2.2730803885  
 N,1.305096433,-2.3691558352,-0.939292655  
 N,1.3853385492,0.2401589892,-0.3719538004  
 N,-1.8144687593,0.4102744401,-0.8485636259  
 N,-1.816998466,-2.2237904881,-1.3671317013  
 O,-0.0509384663,-5.1875496903,-2.5542846181  
 C,2.3650598228,2.2399707937,-0.0535954178  
 C,5.7256552234,-1.8477721902,-0.3572708921  
 C,0.0503058309,4.5031703368,-1.6717205819  
 C,0.1234906344,5.8942391473,-1.6512174224  
 C,0.1164517779,6.563504266,-0.4288957603  
 C,-6.1877253781,-1.3748081045,-0.006883  
 F,5.4758744388,-2.1922804641,-1.6257204029  
 F,0.0580983102,3.8836898168,-2.8575696793  
 F,0.200116375,6.5854711554,-2.7911675108  
 F,0.1854532123,7.8942122192,-0.3963847283  
 F,-6.7624083178,-1.2754613463,-1.2203236231  
 F,-8.3192891821,-1.864628529,0.907509748  
 H,4.3597284276,1.4139369105,0.3947247779  
 H,2.5034240076,3.3064287781,0.0322430609  
 H,-2.7195717283,-5.1328721506,-2.7432496719  
 H,-4.6397027542,-0.6795288291,-1.9098702766  
 H,0.8183787954,-0.5704687724,-0.6641293171  
 H,-1.3296016957,-0.5126036237,-0.9787746052

#### Cartesian Coordination of 2i-f

-3246.2981805 hartree

C,1.1244510028,-3.5744847354,-1.7163309793  
 C,-1.5737801951,1.6915369563,-0.7976819136  
 C,-3.7714393444,1.5168107765,-1.2890033985  
 C,-3.1381576272,0.2205140022,-1.0536355811  
 C,-3.1413720585,-2.2337136399,-1.7320462555  
 C,-2.5467979564,-4.0560603216,-2.9113183033  
 C,-1.4054598329,-3.5387327793,-2.2956459555  
 C,0.8829431607,1.580999089,-0.1658114252  
 C,1.9640041186,2.2414943198,0.5564657479  
 C,2.6008655188,-2.2708636296,-0.6425916066  
 C,3.2052369064,-3.5339752325,-0.8421068194  
 C,2.4575538569,0.1102818451,0.0686925934  
 H,4.2025289903,-3.8043116617,-0.528929506  
 H,1.9586545912,3.2591037933,0.9191957087  
 H,-4.8119338006,1.6771418934,-1.5395460082  
 N,-1.8035742728,-2.4261254039,-1.5723468962  
 N,1.3290736792,-2.3373051348,-1.1835039847  
 N,-1.8621023372,0.3146616299,-0.7672232827  
 N,1.1891367089,0.3131654124,-0.4511693031  
 C,-2.789036067,2.4363050669,-1.139478563  
 H,-2.8620627855,3.506705721,-1.2628882676  
 C,-3.6326828967,-3.2406183005,-2.5601458198  
 H,-4.6631357865,-3.3519378969,-2.8678904302  
 C,2.2906699112,-4.3347944301,-1.5105383492  
 C,2.9446478685,1.3130429185,0.7124619689  
 H,3.8897790348,1.4294535731,1.2227072634  
 C,-0.0767072834,-4.125214385,-2.4024733435  
 C,3.130535024,-1.1068198149,-0.0324891618  
 C,-3.8977237979,-1.0891644168,-1.1118640443  
 C,-0.3570687469,2.2603148436,-0.5052678677

H,-2.5448192368,-4.9319781395,-3.5420973366  
H,2.3989676677,-5.3591249609,-1.8308574756  
C,-0.2774227973,3.7557491794,-0.4885542165  
C,-0.9554902282,4.5310003126,0.4584651055  
C,0.5201427902,4.436835801,-1.4155847053  
C,-0.8586160619,5.9208206363,0.4775822401  
C,0.629710436,5.8243833173,-1.4174945878  
C,-0.0635370421,6.568472894,-0.4648404747  
C,4.508465935,-1.211572037,0.5327247315  
C,4.7820390428,-2.0132189327,1.6466789966  
C,5.581793088,-0.5137664299,-0.0324192646  
C,6.0638967169,-2.1174209004,2.1806615425  
C,6.8716880089,-0.6048826866,0.4847156012  
C,7.1119609055,-1.4100889179,1.5956984233  
F,-1.7183136403,3.9442524729,1.3899868347  
F,-1.5184881985,6.6331066872,1.396462138  
F,0.0334350727,7.8986790354,-0.456450819  
F,1.3891880536,6.4447183869,-2.3252592997  
F,1.1967407804,3.7484734677,-2.3427424491  
F,5.3879209197,0.2621402318,-1.1053834387  
F,7.8770873718,0.0698728302,-0.0803987623  
F,8.3431517439,-1.5030908251,2.0991978185  
F,3.7958510428,-2.6990453315,2.2373425544  
F,6.2920312058,-2.8847811934,3.2503796558  
O,0.0893966131,-5.1623255857,-3.0508266225  
H,0.771398258,-1.4789782778,-1.220817587  
H,-1.2540021633,-1.7682203533,-1.0302014138  
C,-4.5003890631,-1.4084107038,0.2633113417  
C,-3.7398299304,-1.8298614176,1.3572737062  
C,-5.874117326,-1.2663402551,0.4725836957  
C,-4.3164261637,-2.1126388684,2.5929203557  
C,-6.4772227357,-1.5406486625,1.6970628941  
C,-5.6913094572,-1.967035215,2.7637910973  
H,-4.7577478202,-0.9172812573,-1.7634195388  
F,-2.4126072903,-1.9796828275,1.2426768372  
F,-3.5575285982,-2.518674989,3.615738916  
F,-6.2520005908,-2.234142249,3.9452434214  
F,-7.7973676457,-1.3945229301,1.8524483773  
F,-6.6649972465,-0.8470483638,-0.5341565088

#### Cartesian Coordination of 2i-g

-3246.3143714 hartree  
C,1.3594476956,1.442460077,-0.4254586436  
C,-1.3827187977,-3.9155352093,0.6321851871  
C,-3.4385037433,-3.782723868,-0.2850260368  
C,-2.8816826316,-2.4890398209,-0.23333498  
C,-2.8027328592,-0.0216982111,-0.6524629204  
C,-2.442415956,2.1921985843,-0.8485206935  
C,-1.2324715596,1.4595403118,-0.5414679164  
C,1.1879884578,-3.9040727399,0.8537784288  
C,2.3854666085,-4.7256336658,0.8764795508  
C,2.9070202482,-0.1741335357,-0.3236695022  
C,3.5733469977,1.0513074426,-0.5515500778  
C,2.8017418477,-2.6192468931,0.2069648878  
H,4.6408320391,1.1695104709,-0.6605426455  
H,2.4340919064,-5.7658454487,1.1712262742  
H,-4.4101036652,-4.0282018687,-0.6867117558  
N,-1.4361034757,0.1517295399,-0.4092810262  
N,1.5610450138,0.1045810705,-0.260133371  
N,-1.6266026722,-2.6187052463,0.3331042975

N,1.4196911794,-2.6697460303,0.4592365287  
C,-2.5027533877,-4.6676582229,0.2515814059  
H,-2.6032857346,-5.7374491223,0.3678407964  
C,-3.4274615124,1.2583071881,-0.9305144716  
H,-4.4756585475,1.4189034065,-1.1381284931  
C,2.6112186359,2.0535097148,-0.6009131871  
C,3.3987962581,-3.9180056324,0.4616781167  
H,4.4438929629,-4.1692826467,0.3518384198  
C,0.0728765136,2.1591711045,-0.4634921885  
C,3.4796747763,-1.4705181405,-0.1490743709  
C,-3.4506537594,-1.2505366083,-0.6321936279  
C,-0.1518661839,-4.4338551922,1.3231295764  
H,-2.4983564466,3.2611751057,-0.9878324012  
H,2.7508129718,3.1121565883,-0.7557173934  
C,-4.882834659,-1.2980781029,-1.0573745032  
C,-5.2580113262,-1.0489444923,-2.3825623087  
C,-5.9044326793,-1.6019119977,-0.1502821346  
C,-6.5886803834,-1.098652659,-2.7913310838  
C,-7.2409476169,-1.6542716728,-0.5372240618  
C,-7.5826534756,-1.4020755725,-1.8640228146  
C,4.9601986298,-1.5653262065,-0.3534392258  
C,5.8622077417,-1.0809395341,0.5981404208  
C,5.4945356293,-2.143298612,-1.5085347073  
C,7.2402248594,-1.1653366414,0.4142239705  
C,6.8691539585,-2.2398972861,-1.7129458553  
C,7.7436611473,-1.7483187858,-0.7466897004  
F,-5.6128816344,-1.8386759662,1.1347795092  
F,-8.1945256956,-1.9397181485,0.3549604453  
F,-8.8597052339,-1.4512872156,-2.245515367  
F,-6.9153507555,-0.8634434486,-4.0656866613  
F,-4.3296439339,-0.7650068641,-3.302824222  
F,4.6800132476,-2.623965555,-2.4558924484  
F,7.3513391304,-2.7986960648,-2.8273016186  
F,9.0618815471,-1.8368907259,-0.931634332  
F,5.4073692301,-0.5197270074,1.7255299646  
F,8.0789175313,-0.6973638903,1.3437420731  
O,0.090116832,3.3905657879,-0.4992671723  
H,0.84548298,-0.6001394077,-0.1156211024  
H,-0.9899099062,-1.8383759798,0.4499594476  
H,-0.1413857368,-5.5066645278,1.1171920876  
C,-0.2551238983,-4.3273925092,2.8520370977  
C,-0.2581856965,-5.4829118489,3.6365602648  
C,-0.3356526833,-3.1079977805,3.5295910212  
C,-0.3445748451,-5.4427785334,5.0256099127  
C,-0.4246769159,-3.0376260264,4.9173009852  
C,-0.4290660635,-4.210913227,5.6686497567  
F,-0.1699955572,-6.691615671,3.0490670059  
F,-0.3449227135,-6.5734854414,5.7390427324  
F,-0.5133547165,-4.1531400419,6.9989619708  
F,-0.5042348236,-1.8536391384,5.5311096921  
F,-0.3320791546,-1.9536429009,2.8458438542

#### Cartesian Coordination of 2i-h

-3246.2879882 hartree  
C,7.498423374,-1.5250842309,-0.5671279741  
C,6.9482307133,-0.8117721725,0.495012277  
F,8.8247995527,-1.6289686118,-0.6879993231  
F,7.7496218612,-0.2314242453,1.3959421708  
C,6.6627880729,-2.1280189222,-1.5041946234  
F,7.1901115223,-2.8102314569,-2.5273921628

C,-0.1017253146,-4.379168659,1.5512888586  
 C,1.1612575624,-3.7475147712,1.2074608274  
 C,2.440314401,-4.3312837014,1.4679274807  
 C,3.3503127671,-3.4410220305,0.9688147182  
 C,2.5963763457,-2.3297083179,0.4257864757  
 C,3.2052483697,-1.1978619083,-0.1730511954  
 C,2.6575948084,0.0008413295,-0.6366447851  
 C,3.4429739119,1.0548468009,-1.2400592304  
 C,1.2964362977,1.6233893926,-1.0867549218  
 C,0.0581025287,2.4814262268,-1.1951484885  
 C,-1.2595326942,1.776858796,-1.0786705381  
 C,-2.5265036905,2.2847658198,-1.4339218667  
 C,-3.4443324769,1.2889766298,-1.1715135406  
 C,-2.7475979999,0.1628724396,-0.6406585749  
 C,-3.3520193431,-1.0254734057,-0.2031425662  
 C,-2.7954979288,-2.1818403023,0.3619986868  
 C,-3.5485045039,-3.2832628024,0.8841487982  
 C,-2.6678600489,-4.210574307,1.3922845718  
 C,-1.3700217326,-3.6973914945,1.1798105729  
 C,4.7011163432,-1.3033044942,-0.3140276465  
 C,5.563550425,-0.7084131708,0.6089678805  
 C,0.1368142569,3.6664917977,-0.2261702643  
 C,0.0597418884,4.5935669624,2.0282592841  
 C,-0.047103772,3.5183891992,1.1509721457  
 C,-4.8483991046,-1.0574127278,-0.3444685605  
 C,-6.841862176,-1.7796994476,-1.5446264211  
 C,-7.6480692255,-1.1386882647,-0.6057512719  
 C,-7.067503247,-0.4563782971,0.4620112953  
 C,-5.6800841789,-0.4221410963,0.5812143424  
 F,5.0659716237,-0.0159296236,1.6419284503  
 F,-0.1329058071,4.4201100599,3.3387235244  
 F,-0.3468022665,2.3143712672,1.6571153373  
 F,-8.9741904987,-1.176987949,-0.7293910459  
 F,-7.8400236209,0.1571200545,1.3617032176  
 F,-5.1459935663,0.2387583974,1.6148441887  
 H,2.609698548,-5.2798883785,1.9556367509  
 H,4.4265237278,-3.5309036361,0.9853208521  
 H,-2.7154718637,3.2681625401,-1.8392852842  
 H,-4.5097261206,1.3317311217,-1.3360152701  
 H,-4.6260351244,-3.3423082828,0.8853426738  
 N,1.2507423898,-2.5478427014,0.5875021199  
 N,1.318663605,0.4019625633,-0.5670045018  
 N,-1.3989872563,0.5227343684,-0.6112375471  
 N,-1.4565932601,-2.4925167828,0.5742704192  
 O,-0.1877158059,-5.46636617,2.1286816195  
 C,2.5846533667,2.0809039435,-1.521377458  
 C,5.2812103238,-2.0133133339,-1.3671191072  
 C,0.4511920172,4.9446712478,-0.6891176315  
 C,0.569909689,6.037235647,0.1662227997  
 C,0.3717724446,5.8587046001,1.5328072987  
 C,-5.45662896,-1.7340466942,-1.4048921558  
 F,4.5049135724,-2.6039829734,-2.2848939551  
 F,0.6628193861,5.1458165485,-2.003685049  
 F,0.8723330247,7.24663703,-0.3160082206  
 F,0.4789284601,6.8952933179,2.3658116207  
 F,-4.703702206,-2.3571002162,-2.3184188597  
 F,-7.3981052652,-2.4306307894,-2.5688230129  
 H,4.5044203579,1.021388349,-1.4354618465  
 H,2.8042996512,3.036691497,-1.9785620054  
 H,-2.873385482,-5.1566727242,1.8681555604

H,-0.5584494565,-2.0325719318,0.3302899882  
 H,0.0691113857,2.9281596729,-2.1963110553  
 H,-0.5309965789,0.017754405,-0.3504168454

#### Cartesian Coordination of 2i-i

-3246.304707 hartree  
 C,1.3150219264,-2.2345452122,-2.2578298692  
 C,-1.2885582169,1.4793110636,1.530871275  
 C,-3.3796304064,0.7746480493,2.0199484015  
 C,-2.9120475123,0.0635456739,0.9005007515  
 C,-2.9164284601,-1.604861763,-0.9423854391  
 C,-2.5115774294,-2.9184266743,-2.7225033161  
 C,-1.3150364444,-2.2345427472,-2.2578284366  
 C,1.288553562,1.4793047527,1.5308734227  
 C,2.3640468978,1.6547284951,2.4108253852  
 C,2.9164158605,-1.6048693259,-0.94238687  
 C,3.5125377749,-2.5340681449,-1.8852141268  
 C,2.9120390356,0.0635355487,0.9005014546  
 H,4.5506121954,-2.8339513289,-1.9130557764  
 H,2.3886686147,2.3569725252,3.2321574741  
 H,-4.3443589824,0.6471191488,2.4882089744  
 N,-1.5536152974,-1.4520608004,-1.2184093787  
 N,1.5536028082,-1.4520653494,-1.2184096217  
 N,-1.6354057146,0.5218826384,0.6358508463  
 N,1.6353998772,0.5218789103,0.6358496716  
 C,-2.3640535017,1.6547430884,2.4108192578  
 H,-2.3886745245,2.356990241,3.2321487019  
 C,-3.5125524603,-2.5340618402,-1.8852102211  
 H,-4.5506272854,-2.8339438037,-1.9130502189  
 C,2.5115614467,-2.9184300062,-2.7225069867  
 C,3.3796217251,0.7746316323,2.0199531329  
 H,4.344348714,0.6470973366,2.4882155026  
 C,-0.0000078196,-2.4869548997,-2.9090789386  
 C,3.544357035,-0.9284317531,0.0936426638  
 C,-3.5443678629,-0.9284211499,0.093643146  
 C,-0.0000004264,2.2694444793,1.5084107647  
 H,-2.5482825487,-3.5974502986,-3.5612199774  
 H,2.5482648381,-3.5974522701,-3.5612248352  
 C,-4.9736397612,-1.2314205024,0.3932154696  
 C,-5.3689134055,-2.4866999051,0.870264365  
 C,-5.9774481306,-0.2726531868,0.2118118338  
 C,-6.7007911926,-2.7793961798,1.1543315109  
 C,-7.3146570374,-0.5453095272,0.4872234214  
 C,-7.6764138298,-1.8043907145,0.9610689721  
 C,4.9736278588,-1.231435554,0.3932149284  
 C,5.9774387825,-0.2726700953,0.2118151936  
 C,5.3688982098,-2.4867175695,0.8702598415  
 C,7.3146468497,-0.5453306802,0.4872266723  
 C,6.7007751013,-2.7794180772,1.154326769  
 C,7.6764002656,-1.8044143754,0.961068133  
 F,-5.6681833603,0.9433728945,-0.2558334561  
 F,-8.2506659018,0.3891910562,0.2937585642  
 F,-8.954807658,-2.0749413081,1.2286394219  
 F,-7.0449348692,-3.9855866801,1.6157112883  
 F,-4.4589859726,-3.4444323625,1.0802809313  
 F,4.458968441,-3.4444485288,1.0802728507  
 F,7.0449155423,-3.985610958,1.6157027129  
 F,8.9547932708,-2.0749690367,1.2286383936  
 F,5.6681775218,0.9433582651,-0.2558264422  
 F,8.250658166,0.3891682048,0.2937654856

O,-0.0000090218,-3.0393927228,-4.0090909183  
H,-1.1070359678,0.0872513635,-0.1261956157  
H,-0.0000001294,2.8285947495,2.4452579713  
C,0.0000040287,3.3414442107,0.4069153556  
C,-0.0000014884,4.6947457322,0.7531113339  
C,0.0000142406,3.047750223,-0.9577478642  
C,0.0000026192,5.7096874239,-0.2002160714  
C,0.0000186407,4.0386358361,-1.9348813206  
C,0.0000128099,5.378415987,-1.552423317  
F,-0.0000110659,5.0549712309,2.0497956743  
F,-0.0000027048,6.9923073308,0.1749363461  
F,0.0000172595,6.3385371534,-2.4781533727  
F,0.0000287541,3.7139569777,-3.2299735319  
F,0.00002093,1.7654904673,-1.3726613338  
H,1.1070287867,0.0872496419,-0.1261970106

#### Cartesian Coordination of 2i-j

-3246.3058581 hartree

C,1.3232286338,-2.6854957082,-2.0233602776  
C,-1.2972547094,1.4300996446,1.3473396684  
C,-3.4516128454,0.9737785118,1.8365322083  
C,-2.9077968514,0.0727644011,0.8367577034  
C,-2.9316146198,-1.79111476,-0.8060822174  
C,-2.4891457745,-3.2758461694,-2.4488489399  
C,-1.2883047566,-2.6575246113,-2.0632162536  
C,1.3156720312,1.4660928023,1.3177027773  
C,2.486592027,1.9397839925,2.0456268042  
C,2.9579053514,-1.801528218,-0.7665671907  
C,3.5177300034,-2.8557526527,-1.5156079723  
C,2.9339148245,0.1145828518,0.8165004943  
H,4.5463445656,-3.1806433315,-1.4691403542  
H,2.5175321729,2.8034001229,2.697372575  
H,-4.4528688123,0.9473015433,2.2422031514  
N,-1.5796670484,-1.7674724586,-1.0662355159  
N,1.6205347877,-1.7304524019,-1.0913016178  
N,-1.5659068446,0.3982049314,0.581210959  
N,1.5756222807,0.3975883784,0.6002889597  
C,-2.4435543114,1.8306161562,2.1544698225  
H,-2.462953675,2.6519601597,2.8591403629  
C,-3.5101477309,-2.747189954,-1.6644187799  
H,-4.5583802572,-3.0039374988,-1.7000818881  
C,2.5034214558,-3.3938757688,-2.3022989155  
C,3.5002365128,1.0875978301,1.7327935598  
H,4.5242484828,1.1196237383,2.0766698156  
C,0.0217655373,-3.0397096044,-2.6276327495  
C,3.5833779335,-0.9168864642,0.1698318535  
C,-3.5574154777,-0.9425814677,0.1647235526  
C,-0.0010305315,2.2121576712,1.3620163125  
H,-2.5539836301,-4.0382077091,-3.2095154866  
H,2.5587539238,-4.2186904362,-2.9955949419  
C,-5.0062875758,-1.1819600511,0.4284919298  
C,-5.448593007,-2.3735015912,1.0155758503  
C,-5.9815363392,-0.2362236237,0.0919034093  
C,-6.7967982359,-2.6169313639,1.2631976242  
C,-7.3356829467,-0.4598161924,0.3301809806  
C,-7.7434192956,-1.6548172032,0.917821059  
C,5.0338553355,-1.1427744167,0.444869603  
C,6.0099623137,-0.8826994903,-0.5229071986  
C,5.4725782333,-1.6266006289,1.6818381106  
C,7.3644404318,-1.0921195429,-0.2766177202

C,6.822333036,-1.8429307845,1.9498425644  
C,7.7705713874,-1.574139159,0.9658004429  
F,-5.6302789216,0.9191306609,-0.4857134141  
F,-8.2434624763,0.4615208115,-0.0067516925  
F,-9.037642616,-1.8771801864,1.1509681457  
F,-7.1856533596,-3.7609999311,1.8340405132  
F,-4.5639151261,-3.3138698842,1.3685849414  
F,4.587968495,-1.9013881632,2.6482584484  
F,7.2101030651,-2.3083100595,3.1413642902  
F,9.0658325645,-1.7759881968,1.2126370008  
F,5.6527388338,-0.4099165193,-1.7234175389  
F,8.2741262431,-0.8270834373,-1.2191359722  
O,0.0298043383,-3.7876343499,-3.6075288992  
H,0.003298646,2.7498680128,2.3135118852  
C,-0.0293726389,3.314492359,0.2936799333  
C,-0.0695237649,4.6582842353,0.674400361  
C,-0.0191750438,3.0499511462,-1.0799306583  
C,-0.0978697167,5.6984943203,-0.2502626663  
C,-0.0472236231,4.0726885958,-2.0255639323  
C,-0.0867793547,5.4014825804,-1.6100695181  
F,-0.0814538502,4.9846061109,1.9815755275  
F,-0.1354144626,6.971328351,0.1592085757  
F,-0.1133209348,6.3849526971,-2.5121449743  
F,-0.0358310768,3.7849719377,-3.3310705704  
F,0.0198052424,1.7911521038,-1.531407271  
H,-1.0147323768,-1.0503701311,-0.6022215553  
H,1.0672689294,-0.9692875369,-0.6863010943

#### Cartesian Coordination of 2<sup>-</sup>a

-3246.0118661 hartree

C,1.2156262321,-4.1178732813,0.056697105  
C,-1.2374685522,1.6435371101,-0.0325426734  
C,-3.4890734114,1.3259529238,-0.0709802952  
C,-2.8505883277,0.0459871853,-0.034536616  
C,-2.8453380215,-2.4795691807,-0.004081825  
C,-2.6121355769,-4.7210866926,0.0224800066  
C,-1.3424495747,-4.0440810858,0.0292103053  
C,1.2711597208,1.5609106768,-0.007205745  
C,2.5667769519,2.2432670175,0.0220337226  
C,2.8114899605,-2.526826405,0.0602822762  
C,3.4506663972,-3.794030433,0.0828850251  
C,2.7950562772,-0.0022398381,0.0364396335  
H,4.519625769,-3.9520720528,0.0993586163  
H,2.7260223259,3.3131570602,0.0269096037  
H,-4.5578806408,1.4832860354,-0.095942335  
N,-1.4845358812,-2.6979790517,0.0136188002  
N,1.4586099872,-2.7660080419,0.0444882045  
N,-1.4877541916,0.2948193329,-0.011311443  
N,1.4326758708,0.2134621597,0.0048356674  
C,-2.51580754,2.2955202118,-0.0728453138  
H,-2.665126006,3.3649623991,-0.1017481987  
C,-3.5631697752,-3.7367648651,0.0014473202  
H,-4.6379835046,-3.8616567561,-0.009044996  
C,2.460980926,-4.770788188,0.0804904503  
C,3.5112999534,1.2714412861,0.0465218069  
H,4.5850288732,1.4003522579,0.0719591008  
C,-0.0828537063,-4.7945179377,0.0494222714  
C,3.4276722421,-1.2423889131,0.0581023816  
C,-3.4635144103,-1.2095931441,-0.0277582251  
C,0.0331506857,2.2464420025,-0.028243034

H,-2.7398140935,-5.7938244738,0.0323286976  
H,2.5754788415,-5.844230159,0.0944361722  
C,-4.964342876,-1.195254774,-0.0500974594  
C,-5.718125631,-1.1770360702,1.1281052782  
C,-5.6835463018,-1.2137260831,-1.2497375959  
C,-7.1120591102,-1.1770814954,1.1220126788  
C,-7.0770460891,-1.2140156673,-1.2840345551  
C,-7.7940487619,-1.1967431317,-0.0911700716  
C,0.0582886513,3.7404597317,-0.0488836842  
C,-0.2116985524,4.505352701,1.0942079764  
C,0.3523953318,4.4625636637,-1.213656948  
C,-0.1919813659,5.8989497441,1.0882531317  
C,0.3849320883,5.8555659301,-1.2465186569  
C,0.1098996301,6.5775607507,-0.0888576927  
C,4.9265340591,-1.2582837344,0.083033226  
C,5.6451939868,-1.2660481954,1.2838858628  
C,5.6839088295,-1.2845506074,-1.093504402  
C,7.0384081211,-1.2895585601,1.3210431023  
C,7.0776188263,-1.3084709462,-1.0850454542  
C,7.7574377375,-1.3115139998,0.1294916391  
F,-5.0350779518,-1.2287431566,-2.4259999127  
F,-7.7348509379,-1.22948647,-2.4575250961  
F,-9.1376056019,-1.1954222671,-0.1108966336  
F,-7.8035783765,-1.1571810904,2.2758449727  
F,-5.1040484008,-1.1560973557,2.3224827446  
F,-0.4949382767,3.8990013435,2.2599861532  
F,-0.4524268408,6.5949978817,2.2105542935  
F,0.1349773907,7.9213398354,-0.1076134149  
F,0.6701557192,6.5098958722,-2.3876576759  
F,0.6109728303,3.8136666706,-2.3618410839  
F,5.072752243,-1.2825674629,-2.2896913467  
F,7.7714304675,-1.3279070843,-2.2377390546  
F,9.1008666832,-1.3332782303,0.1517417069  
F,4.9954751761,-1.2450725016,2.4595604702  
F,7.6944699854,-1.2904154248,2.4958425213  
O,-0.101556366,-6.0433468646,0.0616016027  
H,0.7408736654,-2.049281523,0.0255327386  
H,-0.7657867829,-0.4175675877,0.0081371724

#### Cartesian Coordination of 2<sup>-b</sup>

-3245.9995931 hartree

C,-1.2415176701,-4.1994027611,-0.0004843824  
C,1.2096256804,1.728003471,-0.0083840004  
C,3.439128589,1.3075682064,-0.0520149392  
C,2.7404583893,0.0388764897,-0.0350067882  
C,2.7685775236,-2.5196646049,-0.0423150855  
C,2.5736227771,-4.7913934233,-0.0467723136  
C,1.2915751581,-4.2267588219,-0.0298051599  
C,-1.2734161461,1.6452536355,0.0162755672  
C,-2.5869250718,2.2549350656,0.0661537189  
C,-2.6817273429,-2.5734078443,0.0271157543  
C,-3.4427340429,-3.8124355369,0.0297029412  
C,-2.6972928451,-0.0065107777,0.0421281953  
H,-4.520540844,-3.9027928148,0.0425507058  
H,-2.8082368923,3.3137491138,0.0913932077  
H,4.5138412461,1.4132981685,-0.0740712258  
N,1.4335258027,-2.8562629436,-0.0270190713  
N,-1.3342243193,-2.8534902858,0.0080018824  
N,1.3912871574,0.3565805148,-0.0067467954  
N,-1.3558598622,0.2943614073,0.0054959133

C,2.5224054209,2.3177208396,-0.0391316391  
H,2.7240818607,3.3793422841,-0.0512722752  
C,3.4897936897,-3.7433429813,-0.0544832525  
H,4.5665824097,-3.8288498133,-0.0674689683  
C,-2.5320413782,-4.8336932397,0.011998077  
C,-3.4776037934,1.2202366552,0.0792683045  
H,-4.5557781706,1.2952357377,0.1142867624  
C,0.018601633,-4.9495798017,-0.0183269134  
C,-3.2745776009,-1.2911993019,0.0456365157  
C,3.347599784,-1.2099863469,-0.0479097118  
C,-0.0303113183,2.3534604846,0.0013431126  
H,2.768844894,-5.853385779,-0.0524394299  
H,-2.7029197231,-5.9007068447,0.0080667597  
C,4.8477403666,-1.2000140927,-0.0720877701  
C,5.567143844,-1.2068138553,-1.2727269514  
C,5.6050698788,-1.2044838139,1.1049790331  
C,6.9605578162,-1.2119992561,-1.3093575013  
C,6.9989940749,-1.2097647524,1.0973008328  
C,7.6792003532,-1.2147106007,-0.1171854069  
C,-0.0598086916,3.8444761888,0.0007751791  
C,-0.4370952382,4.5769937636,-1.1335948692  
C,0.2718370554,4.5975412134,1.1353934092  
C,-0.4855152081,5.9694550499,-1.1455989494  
C,0.2374200559,5.9908540126,1.1483680764  
C,-0.1457686785,6.6803983899,0.0020078981  
C,-4.781977175,-1.3025273382,0.0740337709  
C,-5.5399002517,-1.2981365831,-1.1005548661  
C,-5.4958883092,-1.3242506577,1.2756911196  
C,-6.9336950251,-1.3132617179,-1.0894537846  
C,-6.8891322601,-1.3392960673,1.3156584527  
C,-7.6113326738,-1.3342141617,0.1259873643  
F,4.9932546856,-1.1987823763,2.3006791968  
F,7.6922694346,-1.2091885677,2.2499778231  
F,9.0222639171,-1.2182100437,-0.1388222739  
F,7.6168703081,-1.2131092506,-2.4835293755  
F,4.9175287133,-1.2027003854,-2.4484661291  
F,-0.7531968733,3.9392008812,-2.2728237851  
F,-0.8453885008,6.6343430212,-2.2586846071  
F,-0.1840776875,8.0237428184,0.0014922487  
F,0.5615544081,6.6750158595,2.2610525241  
F,0.6316788477,3.9804281039,2.2744956262  
F,-4.8430091067,-1.3284813463,2.4502255639  
F,-7.5423047004,-1.3575052231,2.4923959009  
F,-8.9555582385,-1.3478027605,0.1509709444  
F,-4.9308264323,-1.2775181729,-2.2980302616  
F,-7.6297830624,-1.3068489673,-2.2413908603  
O,0.022379138,-6.1966090089,-0.0237891825  
H,0.5851279171,-2.2828010406,-0.0154512025  
H,0.552752304,-0.2319294131,-0.0024106541

#### Cartesian Coordination of 2<sup>-c</sup>

-3245.9953872 hartree

C,-1.3061702319,-3.8874974987,0.2136863031  
C,1.2772441668,1.5441150221,-0.0852928658  
C,3.5524436048,1.3307566682,-0.0739239466  
C,2.9739398853,0.0332022702,-0.0024362343  
C,2.9349578277,-2.4550120762,0.1344033447  
C,2.5285909101,-4.6607233031,0.255747358  
C,1.3059578945,-3.8875770595,0.2134592392  
C,-1.2771742242,1.5441923524,-0.0850848144



C,-2.5284809227,2.2498457259,-0.1238285942  
 C,-2.9350954178,-2.4548323724,0.1349068097  
 C,-3.5567666857,-3.7588762888,0.206590471  
 C,-2.9739485467,0.0333841274,-0.0019296385  
 H,-4.6195537343,-3.9646782596,0.2178712958  
 H,-2.6287500546,3.323381929,-0.1828593115  
 H,4.6129597111,1.5397216381,-0.0856263897  
 N,1.5590587321,-2.5680721175,0.1408960234  
 N,-1.5592025748,-2.5679779611,0.1411405134  
 N,1.5962469711,0.2077864946,-0.0117647656  
 N,-1.5962464541,0.2078810347,-0.011545377  
 C,2.5285871778,2.2496871696,-0.1243293777  
 H,2.6289123918,3.3232133545,-0.1834464622  
 C,3.5565610705,-3.7590963659,0.2059455713  
 H,4.6193374216,-3.9649646988,0.2170216727  
 C,-2.5288432676,-4.6605665015,0.2562165026  
 C,-3.5523848661,1.330978077,-0.0732512692  
 H,-4.6128901798,1.5400107331,-0.0847211675  
 C,-0.0001240165,-4.5723433578,0.2513763773  
 C,-3.5997278747,-1.2166367121,0.0668225441  
 C,3.5996542808,-1.2168580767,0.0661964407  
 C,0.0000501889,2.1441043434,-0.1181484098  
 H,2.5709303105,-5.7384246798,0.3149876915  
 H,-2.571239081,-5.7382640387,0.3154866699  
 C,5.0969029238,-1.2223525197,0.0662089801  
 C,5.8332041837,-1.2981328472,-1.1210853927  
 C,5.8336585806,-1.1674955496,1.2543621507  
 C,7.2268723416,-1.3187421983,-1.1341057875  
 C,7.2273397625,-1.1865557032,1.2690351376  
 C,7.9263904555,-1.2637660211,0.0679439396  
 C,0.0000888787,3.6401136704,-0.2004484316  
 C,-0.0002665385,4.3148356692,-1.4277938692  
 C,0.0004825569,4.4453616057,0.9455125304  
 C,-0.0002378194,5.7058499046,-1.5191923051  
 C,0.0005262948,5.8380051359,0.8838116377  
 C,0.0001625587,6.4705458823,-0.3561137612  
 C,-5.0969767891,-1.2220374186,0.0671310655  
 C,-5.8335171716,-1.297793033,-1.1200163973  
 C,-5.8334945185,-1.1671132052,1.2554288341  
 C,-7.2271892508,-1.3183157891,-1.1327614892  
 C,-7.2271738682,-1.1860859791,1.2703770772  
 C,-7.9264665617,-1.2632743275,0.0694253338  
 F,5.2025342918,-1.0899467652,4.4373706159  
 F,7.9023932028,-1.1299683642,2.4313530223  
 F,9.2699186908,-1.2814807796,0.0686481051  
 F,7.9014961176,-1.3899956123,-2.295869523  
 F,5.2016162536,-1.3508235444,-2.3052132483  
 F,-0.0006422687,3.6214453505,-2.578521101  
 F,-0.000582725,6.3164696565,-2.7183097066  
 F,0.0001972697,7.8121301399,-0.4298909727  
 F,0.0009059553,6.576451761,2.0087285451  
 F,0.0008249155,3.8823419069,2.1653326083  
 F,-5.2021320569,-1.0895835107,2.4383117203  
 F,-7.9019945741,-1.1294356505,2.4328271055  
 F,-9.2699957418,-1.2809051555,0.0703960106  
 F,-5.2021661911,-1.3505433406,-2.3042677098  
 F,-7.9020465039,-1.3895479495,-2.2943908647  
 O,-0.0001557381,-5.8198531449,0.3201670358  
 H,-1.0111950089,-0.6308465775,0.0345605109  
 H,1.0111516799,-0.6309032681,0.0344713894

# Cartesian Coordination of 2<sup>-</sup>-d

-3245.9991568 hartree  
 C,-1.2953978798,-3.9698470373,-0.0160487501  
 C,1.2758078761,1.4713975136,0.0062193215  
 C,3.544792167,1.3563297569,0.0095736046  
 C,2.9219118004,0.0356413919,0.0257986816  
 C,2.9697548234,-2.4561568884,0.0254772693  
 C,2.5162287918,-4.6722894954,0.0491217117  
 C,1.295441834,-3.9698309216,0.0175272261  
 C,-1.2758233209,1.471381843,-0.0060058474  
 C,-2.5261400194,2.2497760354,0.0005945959  
 C,-2.96972547,-2.4561935423,-0.0248046233  
 C,-3.5522009757,-3.7459297354,-0.0558846419  
 C,-2.9219099716,0.035604794,-0.0254931556  
 H,-4.6126833611,-3.9528927703,-0.0826115632  
 H,-2.6075343283,3.3281443569,0.0136289159  
 H,4.6064106827,1.5654708798,0.00377674  
 N,1.6043485636,-2.6238982386,0.0033517851  
 N,-1.6043244649,-2.6239157061,-0.00220527  
 N,1.5509890901,0.1458080482,0.0204793498  
 N,-1.5509888821,0.1457870134,-0.0200659422  
 C,2.526115647,2.2498044304,-0.0005843918  
 H,2.6074971297,3.3281715444,-0.0137976648  
 C,3.5522568491,-3.7458825826,0.0564943959  
 H,4.6127508656,-3.9528292502,0.0828866726  
 C,-2.5161629203,-4.6723223123,-0.0481140962  
 C,-3.5448060362,1.3562891378,-0.0095458133  
 H,-4.6064272953,1.5654202881,-0.0039005938  
 C,0.0000222646,-4.6514779516,0.0010502391  
 C,-3.6033698716,-1.1793933995,-0.0279529737  
 C,3.6033850593,-1.1793490407,0.0283164955  
 C,-0.0000112724,2.084522045,0.0000698479  
 H,2.578710559,-5.7497662675,0.0648540109  
 H,-2.5786259901,-5.7498013487,-0.0637672325  
 C,5.0965415301,-1.1736023056,0.0360610539  
 C,5.8434072581,-1.4693912943,-1.1119836703  
 C,5.831552063,-0.8848854882,1.1930581229  
 C,7.2367657713,-1.4743094615,-1.1181503128  
 C,7.2253121455,-0.8797923734,1.2129390536  
 C,7.9311885758,-1.1772144152,0.0511819948  
 C,-0.0000200305,3.5873998588,-0.0000613543  
 C,-0.0026173392,4.3292577498,-1.1874073516  
 C,0.0025683284,4.3294640676,1.1871558337  
 C,-0.0025372638,5.7231778755,-1.2029190898  
 C,0.0024718688,5.7233869346,1.2024248793  
 C,-0.0000368027,6.4236734048,-0.0003079692  
 C,-5.0965248451,-1.1736631563,-0.0360203663  
 C,-5.8312878125,-0.8851413437,-1.1932235425  
 C,-5.8436363878,-1.4692718937,1.1119108655  
 C,-7.2250435344,-0.8800642549,-1.2134069219  
 C,-7.2369962221,-1.4742025551,1.117763505  
 C,-7.9311687264,-1.1773038165,-0.0517543442  
 F,5.1976316214,-0.6076289915,2.344925336  
 F,7.8944771634,-0.5982393531,2.3459170426  
 F,9.2750220869,-1.1761101636,0.0573648068  
 F,7.9174747439,-1.7540455244,-2.2446068937  
 F,5.2195906167,-1.7467464884,-2.2690144149  
 F,-0.0044631316,3.7006738475,-2.3756509031  
 F,-0.0045473668,6.3987877892,-2.3675417609

F,-0.0000447642,7.7682727391,-0.0004247119  
 F,0.0044739399,6.3991995508,2.3669298033  
 F,0.0044216211,3.7010870135,2.3755085825  
 F,-5.2200680042,-1.7464307436,2.2691223086  
 F,-7.9179463439,-1.7537614832,2.2441309807  
 F,-9.2750009499,-1.1762134634,-0.0582284752  
 F,-5.1971206383,-0.6080676759,-2.3449991971  
 F,-7.8939659078,-0.5987027716,-2.3465759099  
 O,0.0000372521,-5.9029811382,0.0004576156  
 H,-1.0189879611,-1.7836214585,0.0103155361  
 H,1.0189975018,-1.7836118078,-0.0090072805

#### Cartesian Coordination of 2<sup>-</sup>e

-3245.9660485 hartree

C,-1.2609486603,-4.024168538,-0.004468265  
 C,1.2063140691,1.6049863041,-0.0108205795  
 C,3.459398799,1.2945668595,-0.0480043074  
 C,2.8182305483,0.0074926495,-0.0453832674  
 C,2.8409579404,-2.5056271646,-0.0603374682  
 C,2.5399844931,-4.7383217226,-0.068759484  
 C,1.2830320651,-4.0058745079,-0.0445660607  
 C,-1.3046555639,1.6054635198,0.0285820557  
 C,-2.5977170035,2.2909643656,0.0528285432  
 C,-2.7957041305,-2.4979731521,0.0284709361  
 C,-3.5002265039,-3.7772317473,0.0326004774  
 C,-2.8053560678,0.0359713913,0.043134147  
 H,-4.5713750931,-3.9338349005,0.0488834493  
 H,-2.765930377,3.3603042565,0.0616190798  
 H,4.5285429517,1.4508708397,-0.0638894882  
 N,1.499731337,-2.6610151149,-0.0400320886  
 N,-1.4587174193,-2.6858609812,0.006087905  
 N,1.4537710826,0.2466718681,-0.0225421786  
 N,-1.4571239413,0.2670295995,0.0233106338  
 C,2.4888341229,2.2579312139,-0.0272102078  
 H,2.6362359145,3.3283294706,-0.0233561911  
 C,3.5251389117,-3.7934651526,-0.078747979  
 H,4.5947583102,-3.9604405536,-0.0966624041  
 C,-2.5326841859,-4.7414852381,0.0118341274  
 C,-3.5359520301,1.3069537695,0.0619058065  
 H,-4.6109698385,1.4310768216,0.0794832851  
 C,0.0190872524,-4.6294674206,-0.0282389729  
 C,-3.4251125415,-1.223004466,0.0456804655  
 C,3.4655876887,-1.2307886432,-0.0627529858  
 C,-0.0393314789,2.2453992196,0.0124309374  
 H,2.6460450117,-5.8142083817,-0.0768018836  
 H,-2.7129973253,-5.8123997522,0.0089093813  
 C,4.9635040865,-1.2068168054,-0.0861667132  
 C,5.6842149491,-1.2022869395,-1.286197273  
 C,5.7215785662,-1.2163972365,1.0905888555  
 C,7.0777198683,-1.2037047464,-1.3225313555  
 C,7.115535923,-1.2179845045,1.0830830763  
 C,7.7963287752,-1.2126811235,-0.1307350208  
 C,-0.0257256643,3.7428996333,0.0209004697  
 C,-0.0486541728,4.4905129786,-1.1628890207  
 C,-0.0106084398,4.4767042827,1.2134217061  
 C,-0.0551094853,5.8844918188,-1.169319489  
 C,-0.0165861398,5.8705167608,1.2362546004  
 C,-0.0396708628,6.5773126702,0.0375964806  
 C,-4.9272194087,-1.2336371137,0.069325549  
 C,-5.6848932491,-1.2409452985,-1.1069448

C,-5.6474360347,-1.2533642027,1.2687559849  
 C,-7.0787443486,-1.261271761,-1.0996729611  
 C,-7.0408258968,-1.2738474156,1.3052162287  
 C,-7.7598080976,-1.2783379648,0.1137521947  
 F,5.1109038412,-1.2212950896,2.2871509035  
 F,7.8094029821,-1.2252210804,2.2365624149  
 F,9.1405379797,-1.2138485526,-0.1518701811  
 F,7.7349830612,-1.197131674,-2.4972575247  
 F,5.0362315086,-1.1931098421,-2.4629498576  
 F,-0.0634449414,3.8686113507,-2.3536995432  
 F,-0.0764117445,6.5671159004,-2.3294243771  
 F,-0.0453651636,7.9216786249,0.0454929126  
 F,-0.0006202764,6.5396039449,2.4043039646  
 F,0.0125934812,3.8410120795,2.3967925127  
 F,-4.9996996382,-1.251236122,2.4460849665  
 F,-7.6979572602,-1.2904357091,2.4804537938  
 F,-9.1045051916,-1.2983346551,0.1348508199  
 F,-5.0745956296,-1.2263429495,-2.3040205825  
 F,-7.7725995783,-1.2656613228,-2.2537204493  
 O,0.0842148408,-6.0041334291,-0.0372381048  
 H,0.7313673129,-0.4800375159,-0.0154063391  
 H,-0.8119252892,-6.3611227014,-0.0255812607

#### Cartesian Coordination of 2<sup>-</sup>f

-3245.9655645 hartree

C,-1.2642597814,-4.0200777698,-0.0311705183  
 C,1.2016875441,1.6066368927,-0.0173914833  
 C,3.4549306291,1.2954136025,-0.0007467903  
 C,2.813671407,0.007306857,0.0098257275  
 C,2.8390313623,-2.5074542734,0.0334654175  
 C,2.5411110786,-4.736822044,0.1102691985  
 C,1.2792188781,-4.0149949223,0.0205574978  
 C,-1.3095402124,1.608347576,-0.0055242339  
 C,-2.6035273307,2.2904758102,-0.0188610626  
 C,-2.795398658,-2.4989845603,-0.0221663728  
 C,-3.4974568135,-3.7843039648,-0.074140565  
 C,-2.8062532939,0.0352652259,-0.0061121752  
 H,-4.5687742981,-3.9385002386,-0.1046658147  
 H,-2.7749172192,3.3591730604,-0.0308984794  
 H,4.5240033728,1.4520209504,0.0021343307  
 N,1.500848546,-2.6714307444,-0.0223072542  
 N,-1.4569067344,-2.681299368,0.006278158  
 N,1.4487782373,0.2473714444,-0.0051380852  
 N,-1.4588086572,0.2695067071,0.0021127288  
 C,2.4851724231,2.2583560243,-0.0131299999  
 H,2.6334891265,3.3285210434,-0.0168446515  
 C,3.5245597973,-3.7866426023,0.1180058736  
 H,4.5918276109,-3.9529235004,0.1889801108  
 C,-2.5287563178,-4.7439629532,-0.082417807  
 C,-3.5396146869,1.3036172569,-0.016613422  
 H,-4.614991841,1.4251317498,-0.0240573404  
 C,0.0073073555,-4.6323099419,-0.0195592951  
 C,-3.4240621128,-1.2265252966,-0.015820548  
 C,3.4633221037,-1.2289313121,0.0309279068  
 C,-0.0429962401,2.248663594,-0.0173837075  
 H,2.7039524391,-5.8072722595,0.1884013674  
 H,-2.6498772387,-5.8178388628,-0.1203043511  
 C,4.9596764462,-1.2046324856,0.0625649162  
 C,5.7257618137,-1.4489682403,-1.0843469351  
 C,5.6754924909,-0.9653985939,1.2424010506

C,7.1194643113,-1.4544457231,-1.0677257726  
 C,7.0687301292,-0.9622711736,1.2863093476  
 C,7.7941052263,-1.2100208374,0.1247845246  
 C,-0.0294855871,3.745131315,-0.0323313925  
 C,0.1829301088,4.4753881022,-1.2086813234  
 C,-0.2506283723,4.498278871,1.1279277501  
 C,0.1801243395,5.8689354759,-1.2375035134  
 C,-0.2624161351,5.892123464,1.1267387997  
 C,-0.0456700074,6.580654139,-0.0630992018  
 C,-4.9266620028,-1.2376042231,-0.0309570718  
 C,-5.6545821117,-1.2294109346,-1.2256028121  
 C,-5.6757821183,-1.2732969061,1.1500172579  
 C,-7.048108684,-1.2511031711,-1.2529360397  
 C,-7.0695747917,-1.2952703282,1.1517730369  
 C,-7.7588612759,-1.2846212352,-0.0570421437  
 F,5.0224403699,-0.7326905723,2.3935996503  
 F,7.7195887294,-0.7296926388,2.4414657853  
 F,9.1381739752,-1.2111983634,0.1541787504  
 F,7.8194969667,-1.6882709779,-2.1934739841  
 F,5.122508223,-1.6788982833,-2.2624606354  
 F,0.3958135832,3.8358700058,-2.371427798  
 F,0.3871689385,6.5334877013,-2.3898833005  
 F,-0.0520998524,7.9250530446,-0.077428381  
 F,-0.4746779292,6.5790269385,2.2648136924  
 F,-0.4525147576,3.8815892037,2.3042810629  
 F,-5.056907477,-1.284773836,2.3426289986  
 F,-7.7554861558,-1.3269281691,2.3101306751  
 F,-9.1037389664,-1.3054841772,-0.0695074002  
 F,-5.0146644754,-1.1985289981,-2.4068654838  
 F,-7.7132870834,-1.2405555593,-2.4237679102  
 O,-0.0473265468,-6.0069304789,-0.0403121372  
 H,0.7233605941,-0.4762811805,-0.0064009399  
 H,0.8464416092,-6.3582683548,-0.1316680249

#### Cartesian Coordination of 2<sup>-</sup>g

-3245.9633866 hartree

C,-1.2137689516,-4.0120370944,-0.0496464656  
 C,1.2706055282,1.5692485696,0.008141845  
 C,3.5190285357,1.3332409387,0.0272600419  
 C,2.8110836217,0.0453600792,0.0241892282  
 C,2.8071688094,-2.4860668863,0.0255289593  
 C,2.5858310242,-4.7411786399,0.0356198016  
 C,1.3062810453,-4.0508804397,-0.0000149698  
 C,-1.2610799362,1.5732805406,-0.0148481592  
 C,-2.5338863306,2.3105541526,-0.0077211639  
 C,-2.8226749349,-2.4276590894,-0.0515406162  
 C,-3.4559766591,-3.7127074708,-0.0885278742  
 C,-2.8395619127,0.0801094847,-0.0414876756  
 H,-4.523803441,-3.8750651326,-0.1166895989  
 H,-2.6532089368,3.386067739,0.0087979503  
 H,4.5909147541,1.4851681959,0.0351075374  
 N,1.4703265785,-2.7048293878,-0.0041376367  
 N,-1.4649737239,-2.6496585181,-0.0298074486  
 N,1.4646435197,0.2368575768,0.0121933968  
 N,-1.4936375777,0.2328910594,-0.0348112858  
 C,2.5545059147,2.2890135953,0.0171866081  
 H,2.6978646662,3.3621060383,0.0154127622  
 C,3.5303676199,-3.7538256619,0.0503546903  
 H,4.6041862965,-3.8861591659,0.0799038156  
 C,-2.4748231961,-4.6755520432,-0.0864956163

C,-3.5201119573,1.3783529994,-0.0219427331  
 H,-4.5887815446,1.550229988,-0.017234843  
 C,0.0332313008,-4.6536858267,-0.032091738  
 C,-3.4763630182,-1.1748189449,-0.0509891506  
 C,3.4370494388,-1.211253564,0.0332678752  
 C,-0.0002625108,2.2002341425,-0.0008792172  
 H,2.7815197775,-5.8085942661,0.0567772807  
 H,-2.598024188,-5.7479782656,-0.1089922184  
 C,4.9387246036,-1.214239668,0.0533810915  
 C,5.6937397224,-1.2368129216,-1.1245870571  
 C,5.662588305,-1.1970945341,1.2508235669  
 C,7.0877318837,-1.2393623037,-1.1209677535  
 C,7.0562341073,-1.1993114199,1.2837248548  
 C,7.7721220545,-1.2206602484,0.090579421  
 C,0.0046295724,3.7020094069,0.0056439344  
 C,0.0119948083,4.4471727627,-1.1790736369  
 C,0.0125548057,4.4375917235,1.1963494899  
 C,0.0240335838,5.8411188326,-1.1884209323  
 C,0.0243508366,5.8313963594,1.2167109699  
 C,0.030356564,6.5364568388,0.0169738862  
 C,-4.9716537751,-1.2004875603,-0.0603934547  
 C,-5.709722438,-0.953923662,-1.225368668  
 C,-5.7178046627,-1.4624269582,1.0962281114  
 C,-7.1035164667,-0.9613275754,-1.2462493039  
 C,-7.1113447585,-1.4798480526,1.1024262827  
 C,-7.8077206151,-1.2264333721,-0.0756742639  
 F,5.0180946477,-1.1793292347,2.4298245788  
 F,7.7166385271,-1.1824594467,2.4571240002  
 F,9.1169925696,-1.2235377619,0.1082588267  
 F,7.7786144214,-1.2603998276,-2.2766392338  
 F,5.0802649525,-1.2567526795,-2.320009058  
 F,0.0067487112,3.8232798482,-2.3692964649  
 F,0.0296776065,6.5216296247,-2.3505388767  
 F,0.0414847972,7.881516104,0.0226521869  
 F,0.0295937872,6.5027385884,2.3841839542  
 F,0.0064537765,3.8042079194,2.3816936199  
 F,-5.0937181238,-1.7017756178,2.2621240856  
 F,-7.7909867222,-1.7315118021,2.2371057405  
 F,-9.1522352387,-1.2385103719,-0.0826271508  
 F,-5.0782116797,-0.7075639526,-2.3854738658  
 F,-7.7752781493,-0.7227263785,-2.3883074604  
 O,-0.0601334744,-6.0304752107,-0.0450199911  
 H,0.829819473,-6.4003724006,-0.0864268755  
 H,-0.7552056248,-1.9096987507,-0.0158509358

#### Cartesian Coordination of 2<sup>-</sup>h

-3245.9612987 hartree

C,-1.2078456723,-4.0215055863,0.0459376736  
 C,1.2729919224,1.5726712345,-0.0124079036  
 C,3.5205495831,1.3337313965,-0.0038483072  
 C,2.8108070825,0.0468073044,-0.0117651643  
 C,2.8063201825,-2.4842498936,-0.0227273272  
 C,2.5849773269,-4.7411774119,-0.0903321332  
 C,1.3101326028,-4.0462677569,-0.0270021056  
 C,-1.2582562773,1.5737193881,-0.0115886288  
 C,-2.5309313543,2.3102772584,-0.0262221318  
 C,-2.817867477,-2.4282468366,0.054422554  
 C,-3.4538658297,-3.7065301721,0.1271308542  
 C,-2.8360521982,0.0804061724,0.022889745  
 H,-4.5201365092,-3.867237085,0.1909677979

H,-2.6505327137,3.3856282641,-0.0496009103  
H,4.5926547997,1.4840014055,0.0028016798  
N,1.4687358937,-2.6995987677,0.0139526802  
N,-1.4608852258,-2.6585078352,0.0106688706  
N,1.4661000145,0.2393292875,-0.0159773991  
N,-1.4900207429,0.2333367739,0.0145897629  
C,2.5572538125,2.291079038,-0.0045896101  
H,2.7017970514,3.3639990993,0.0005278893  
C,3.5290486103,-3.7576535303,-0.0823934063  
H,4.6031851602,-3.8862794498,-0.120427208  
C,-2.4744423438,-4.6737342441,0.124466615  
C,-3.5171055409,1.3779266184,-0.0069582956  
H,-4.5857475406,1.5498157936,-0.0142448967  
C,0.0465640624,-4.6573595344,-0.0085967393  
C,-3.4719174682,-1.1745080766,0.046440868  
C,3.436169273,-1.2123866894,-0.0199103712  
C,0.0025422908,2.2020992638,-0.0182889448  
H,2.7281493921,-5.8119716776,-0.1339940848  
H,-2.6450329932,-5.7399352863,0.2043843947  
C,4.9381164301,-1.2152938486,-0.0341418454  
C,5.6669201575,-1.1770731456,-1.2279480556  
C,5.6877724422,-1.2581920198,1.1465510405  
C,7.0606258668,-1.1796087077,-1.254924286  
C,7.0817327818,-1.2612001619,1.1488182718  
C,7.7713093221,-1.2219442185,-0.0592551732  
C,0.0059880749,3.7039232065,-0.0288848031  
C,0.0191536436,4.4359609763,-1.2216589938  
C,0.0068888871,4.4523440058,1.1537659732  
C,0.0299119981,5.829702728,-1.2459321804  
C,0.0179035155,5.8463061285,1.1591614281  
C,0.029556112,6.5381722486,-0.0481972093  
C,-4.9666030726,-1.2010304462,0.0666041243  
C,-5.7208145393,-1.5041365634,-1.0749784455  
C,-5.6978246205,-0.9133221111,1.2268742243  
C,-7.1142780725,-1.5219587916,-1.0716645408  
C,-7.0914667488,-0.9196417587,1.2566774446  
C,-7.8033105973,-1.2263481996,0.1009331488  
F,5.0689149439,-1.2968043796,2.3386833562  
F,7.7677039644,-1.3014853772,2.3069052913  
F,9.1163271146,-1.2247356516,-0.0711290417  
F,7.7261055087,-1.1426137476,-2.4250571988  
F,5.0272945258,-1.1386631766,-2.4091631794  
F,0.0193013089,3.7990695069,-2.4051489167  
F,0.0402841225,6.4976901456,-2.415268157  
F,0.0396162196,7.8831965325,-0.0576947227  
F,0.0171659127,6.5301223623,2.3193025932  
F,-0.004163387,3.8317571383,2.3456248136  
F,-5.0594926816,-0.6285970266,2.3742162733  
F,-7.7558592977,-0.6417308425,2.3940139097  
F,-9.1476864189,-1.2384429011,0.1170195874  
F,-5.1045864551,-1.7839144441,-2.2363949475  
F,-7.800859682,-1.8137745599,-2.1925436956  
O,0.0752511643,-6.0385763117,-0.0251989272  
H,-0.7450285493,-1.923965639,-0.0141937879  
H,-0.7913910684,-6.3766804139,-0.2797721903

#### Cartesian Coordination of 2ni

–3414.4908501 hartree

C,1.2165101347,-3.5455013215,-1.4893331557  
C,-1.2160188001,1.7162103852,0.0008346145

C,-3.4018786633,1.3671082008,0.3921999301  
C,-2.7310005784,0.1311919179,0.0670676954  
C,-2.7367100539,-2.2053187056,-0.6460297602  
C,-2.4906647255,-4.1803849707,-1.6967605274  
C,-1.235993891,-3.5098369538,-1.5422070209  
C,1.2236071055,1.7199150746,-0.0468845992  
C,2.4921841416,2.3622853184,0.2040582226  
C,2.7227411135,-2.2275745709,-0.6091768328  
C,3.3952556417,-3.4402905196,-0.9782885066  
C,2.7391607809,0.1355909419,0.0112936089  
H,4.4472500434,-3.6389530512,-0.8378111001  
H,2.6338267316,3.4246970706,0.3362947978  
H,-4.4510397421,1.4615477231,0.6287620019  
N,-1.3921849184,-2.2966200389,-0.9077750761  
N,1.385024586,-2.3067279409,-0.9087375598  
N,-1.3853310357,0.3610973712,-0.1512287022  
N,1.3886365527,0.3621639292,-0.1782839706  
C,-2.4746619545,2.3519797774,0.3097631778  
H,-2.611525169,3.4109357921,0.4711782122  
C,-3.4237731699,-3.3814220168,-1.1080369419  
H,-4.4862504066,-3.5546912191,-1.0216553845  
C,2.459963413,-4.2532524748,-1.5472333217  
C,3.4214050642,1.378985214,0.2805491922  
H,4.4777335136,1.4777870763,0.4812232726  
C,-0.0120021063,-4.076868574,-1.8834080653  
C,3.3770126674,-1.0881894401,-0.1193639305  
C,-3.3799254851,-1.0823813091,-0.1085047783  
C,0.002866381,2.3908329868,-0.0246791948  
H,-2.6207124681,-5.143084146,-2.1678928853  
H,2.6188423346,-5.2582128115,-1.9173096042  
C,-4.8366288045,-1.1852447185,0.1999520699  
C,-5.2814993505,-1.8947073776,1.320952937  
C,-5.8138278372,-0.603210861,-0.6142564554  
C,-6.6347411416,-2.0166247067,1.6280436116  
C,-7.172682877,-0.7077956862,-0.3250326129  
C,-7.5828588722,-1.4188183452,0.8006926784  
C,0.0030379485,3.8810747581,0.0835937621  
C,0.0096551585,4.5313981398,1.3214365855  
C,-0.0031828974,4.6853233657,-1.0601782796  
C,0.0093943049,5.920806182,1.4243625221  
C,-0.0029244095,6.0767010402,-0.982931994  
C,0.0032552267,6.6947029094,0.2655770291  
C,4.8336020561,-1.1900668526,0.191852933  
C,5.2729650929,-1.8083883947,1.3673669863  
C,5.8148878687,-0.6940120824,-0.6723784433  
C,6.6258920668,-1.9259557635,1.6781174017  
C,7.173586324,-0.7956700136,-0.3810376974  
C,7.5786709603,-1.4155070313,0.799166088  
F,-5.4541025111,0.0807201272,-1.7088051858  
F,-8.0830809459,-0.1376594781,-1.1217764817  
F,-8.8822370908,-1.5265935087,1.0863460994  
F,-7.0279005966,-2.6974070048,2.7096106554  
F,-4.3950308398,-2.4790220799,2.1367173732  
F,0.0156577991,3.8143899185,2.4528291621  
F,0.0155169297,6.5141210666,2.6230251595  
F,0.0033016869,8.0267737481,0.3521951518  
F,-0.0088613341,6.8192407223,-2.0949587698  
F,-0.0093827145,4.1214951186,-2.2744774498  
F,5.4589215477,-0.0981225635,-1.8183150151  
F,8.088572679,-0.3098868486,-1.2268639479

F,8.8777938664,-1.5200193335,1.0870678269  
F,4.381505758,-2.3074519252,2.2328507325  
F,7.0141377141,-2.5197497291,2.8114383241  
Ni,-0.0019483809,-0.9659791708,-0.5372760404  
O,-0.078955055,-5.2664481,-2.5410536918  
H,0.8002806328,-5.5144552362,-2.8523248325

#### Cartesian Coordination of 2ni<sup>-</sup>

-3414.1711764 hartree  
C,-1.2473084494,-3.4789102685,-1.6908508228  
C,1.2339951539,1.7019025887,-0.0113989015  
C,3.4193720444,1.3198148539,0.3862273051  
C,2.7343404489,0.0930282178,0.0685017302  
C,2.7122496411,-2.2630909858,-0.6373995333  
C,2.4500745231,-4.2117507584,-1.7297557799  
C,1.228651783,-3.4931361432,-1.6734659109  
C,-1.2164820391,1.7159028765,-0.0284523082  
C,-2.481580174,2.3499125571,0.2624232227  
C,-2.7309417238,-2.2320597185,-0.6751182503  
C,-3.4076033307,-3.4152813837,-1.1044778416  
C,-2.7359706874,0.1241884173,0.0306556898  
H,-4.4579577446,-3.6266571349,-0.957012417  
H,-2.6286687534,3.4091818253,0.420487206  
H,4.4715724312,1.4067776237,0.618927482  
N,1.3793999088,-2.3092592782,-1.0014548197  
N,-1.393806402,-2.2934236349,-1.0207342885  
N,1.3898299417,0.3476484384,-0.165781258  
N,-1.3855643619,0.3634955038,-0.1851014088  
C,2.5020985159,2.3215114806,0.2969098924  
H,2.6590196032,3.3790523351,0.457064548  
C,3.3812114867,-3.454072796,-1.0572559773  
H,4.4269329411,-3.677419655,-0.8952291277  
C,-2.4759634279,-4.1835216219,-1.7641780832  
C,-3.4113263785,1.3587127208,0.3390078009  
H,-4.4655716261,1.4576567351,0.557217941  
O,-0.0091687782,-5.0240446383,-2.962690474  
C,-0.0088945731,-4.0375446206,-2.1956984482  
C,-3.3619493496,-1.100555305,-0.1279849387  
C,3.3484794309,-1.138768583,-0.0815977442  
C,0.0126249344,2.3823142952,-0.0242157868  
H,2.563564761,-5.172864837,-2.2095691004  
H,-2.593771689,-5.1432688783,-2.2456840353  
C,4.7958253339,-1.2653644675,0.272220367  
C,5.8166374862,-0.8635265915,-0.5969190189  
C,5.1996715262,-1.8134307067,1.4953688468  
C,7.1664209624,-0.9914239589,-0.2722192211  
C,6.5420573319,-1.9542718412,1.8437163639  
C,7.5299247519,-1.5404870269,0.9542681367  
C,0.0202042181,3.8697202091,0.1073010979  
C,0.0325597256,4.7029773436,-1.0186321707  
C,0.0154107883,4.5135914675,1.3513325183  
C,0.0398033121,6.0939150175,-0.9220659383  
C,0.0224304449,5.9019181946,1.4771766314  
C,0.034703965,6.6955078285,0.3332713684  
C,-4.8153341678,-1.210730521,0.2059922465  
C,-5.8195706876,-0.7973092873,-0.6769176958  
C,-5.2420272147,-1.7542603341,1.4233958823  
C,-7.1750219038,-0.9099162378,-0.3707009913  
C,-6.5905555759,-1.8798944287,1.7533576005  
C,-7.5614353998,-1.4548895375,0.8505969836

F,4.2820689987,-2.2197916817,2.3873528802  
F,6.8919051223,-2.4807994732,3.0309844557  
F,8.8274021046,-1.6681179723,1.2787233693  
F,8.1204934116,-0.5915085997,-1.132299916  
F,5.5154184888,-0.3339266902,-1.7941831993  
F,0.0378879072,4.1699643152,-2.2512135546  
F,0.0516399444,6.8598070991,-2.0279850546  
F,0.0415618681,8.0347724065,0.4407092309  
F,0.0174669734,6.4825245852,2.6912479841  
F,0.0035705063,3.7912699938,2.4844319042  
F,-4.3413572002,-2.1710393326,2.3277409871  
F,-6.9625193741,-2.4024914805,2.9356284446  
F,-8.8645861831,-1.5678255257,1.1572818814  
F,-5.4960523652,-0.2711302782,-1.8698674318  
F,-8.112670118,-0.4991806062,-1.2436488306  
Ni,-0.002472042,-0.9701571092,-0.5991667197

#### Cartesian Coordination of 2zn

-3310.7656464 hartree  
C,-1.2827273994,-4.0561042041,-0.125532227  
C,1.2476655676,1.5643685982,0.0364770231  
C,3.4904885243,1.2812544302,0.0011237396  
C,2.8130673961,-0.0001249211,-0.0288577292  
C,2.8028884356,-2.5124858617,-0.1032714964  
C,2.5080909652,-4.7519592574,-0.1363570118  
C,1.2417426097,-4.0718034045,-0.1438697454  
C,-1.2630901462,1.5715065518,0.0602112571  
C,-2.5418757711,2.2547234637,0.0554841352  
C,-2.835488621,-2.4987761504,-0.0481731815  
C,-3.5098622637,-3.7747401288,-0.0661268704  
C,-2.8345501506,0.0133224883,0.0279603419  
H,-4.5794787722,-3.9222994483,-0.0350006888  
H,-2.6824988349,3.3256412277,0.0540189498  
H,4.56065694,1.426977433,-0.0158224683  
N,1.4490152548,-2.712918811,-0.1218525902  
N,-1.4805908854,-2.6982342205,-0.0815854551  
N,1.4512565084,0.2096149834,-0.0080192173  
N,-1.4722640138,0.217859798,0.0417006357  
C,2.5301624935,2.2414361919,0.046313876  
H,2.6755628652,3.3109089062,0.0875581347  
C,3.4758487593,-3.7858456312,-0.1103674036  
H,4.5448481253,-3.9375384963,-0.0846991022  
C,-2.5446492627,-4.7407578125,-0.1180957747  
C,-3.5065993931,1.2972484402,0.0355480539  
H,-4.5762234486,1.4466988161,0.0144668633  
C,-0.0261485171,-4.6909607801,-0.1610224215  
C,-3.4733387965,-1.2337362594,-0.0040807314  
C,3.4468787823,-1.2481203549,-0.0704483273  
C,-0.0053061991,2.2084178209,0.0662709656  
H,2.6866074979,-5.8207357557,-0.1351459201  
H,-2.6720767624,-5.8127310293,-0.144522239  
C,4.9424672873,-1.2564086646,-0.0759038933  
C,5.6662348623,-1.5918341901,-1.2253399479  
C,5.6815181812,-0.9348897344,1.0676325836  
C,7.0589592147,-1.6096101523,-1.2432673956  
C,7.0747260759,-0.939751824,1.0727610578  
C,7.7651661538,-1.2802360417,-0.088302745  
C,-0.0017841733,3.7037572543,0.1018829992  
C,0.3330834539,4.4618617272,-1.0251846682  
C,-0.3358751967,4.4083633711,1.2634445092

C,0.341250124,5.8547523856,-1.0038794905  
 C,-0.3411335179,5.8008137783,1.3080074341  
 C,0.0007184887,6.5258042935,0.168554479  
 C,-4.9690893657,-1.2342588047,0.0062369153  
 C,-5.7072632806,-1.5590571776,-1.136850383  
 C,-5.6925814591,-0.9141902588,1.1598795148  
 C,-7.1001641989,-1.568767543,-1.1387299742  
 C,-7.0856316655,-0.9120228166,1.1812058041  
 C,-7.7910885783,-1.2422701615,0.0262579867  
 F,5.0503533058,-0.6089836209,2.2035115901  
 F,7.7508869606,-0.6271867865,2.1835390325  
 F,9.1000931094,-1.2911117748,-0.0942778795  
 F,7.7200098915,-1.9338325812,-2.3598685708  
 F,5.0185581873,-1.9092199952,-2.3544539585  
 F,0.6609997952,3.8485256614,-2.17058653  
 F,0.6663503533,6.5496140195,-2.0996516942  
 F,0.0023396437,7.8605528835,0.1998710383  
 F,-0.6648135276,6.4435336445,2.4354649665  
 F,-0.6653947354,3.742354807,2.3780861449  
 F,-5.0460960612,-0.5973896252,2.2895340783  
 F,-7.7472749335,-0.6015264727,2.3012999594  
 F,-9.126108266,-1.245498585,0.0353884888  
 F,-5.0741839174,-1.8722017413,-2.2752473902  
 F,-7.7760279685,-1.881976314,-2.2495958154  
 Zn,-0.0143857912,-1.2381884759,-0.0441778757  
 O,-0.1052012075,-6.0504729436,-0.2047208181  
 H,0.7783268585,-6.4299302325,-0.2824990172

#### Cartesian Coordination of 2zn<sup>-</sup>

-3310.450939 hartree

C,-1.2839261113,-4.0843234506,-0.0002465265  
 C,1.2583892551,1.5735510354,0.0000875599  
 C,3.5055222396,1.2889579142,0.0000478115  
 C,2.8325748297,0.0088832508,-0.0000670498  
 C,2.8360603615,-2.5177125537,-0.0001922191  
 C,2.5366883576,-4.7575912414,-0.0004546187  
 C,1.2839036318,-4.0843342331,-0.0002840844  
 C,-1.2581361007,1.5736398063,0.0001146677  
 C,-2.5394187378,2.2534330897,0.0001769932  
 C,-2.8359898017,-2.5175938775,-0.0001457813  
 C,-3.5122821673,-3.7807847618,-0.0001751637  
 C,-2.8323861042,0.0090140437,0.0000328992  
 H,-4.58418723,-3.9276231256,-0.0001439436  
 H,-2.6865147316,3.3248786374,0.0002514582  
 H,4.5766740529,1.4395952954,0.0000630421  
 N,1.4728489728,-2.7297745396,-0.0001538125  
 N,-1.4727876926,-2.7297481775,-0.0001829323  
 N,1.4627730316,0.2201872294,-0.0000344657  
 N,-1.4625705633,0.2202821338,0.0000292406  
 C,2.5396935207,2.2533051372,0.0001281044  
 H,2.6868291657,3.3247448496,0.000212363  
 C,3.5122819152,-3.780948704,-0.0002932077  
 H,4.5841795856,-3.9278423358,-0.0003225116  
 C,-2.5367447221,-4.7574935238,-0.0002897672  
 C,-3.5052798216,1.2891216813,0.0001268217  
 H,-4.576425485,1.439802256,0.0001491142  
 C,-0.0000204652,-4.7968522128,-0.0002996002  
 C,-3.4577205446,-1.2391055216,-0.0000513385  
 C,3.4578577424,-1.239267509,-0.0001340243  
 C,0.0001414062,2.2136534678,0.0001492543

H,2.6533780389,-5.8315952395,-0.0006037842  
 H,-2.6535111893,-5.8314894775,-0.0003608  
 C,4.9574511531,-1.2406888493,-0.0001341808  
 C,5.6947711168,-1.2485099061,-1.189225227  
 C,5.6947621318,-1.2494143112,1.1889580643  
 C,7.0887839544,-1.2608993718,-1.2036174615  
 C,7.0887734882,-1.2618162886,1.2033514376  
 C,7.788572685,-1.2681229743,-0.0001334607  
 C,0.0001862119,3.710183595,0.0002642947  
 C,0.0000304595,4.4518154031,-1.1879202322  
 C,0.0003795558,4.4516310029,1.1885644738  
 C,0.0000636347,5.8459327071,-1.2029517973  
 C,0.0004201215,5.8457457805,1.2038112065  
 C,0.0002623428,6.5458417995,0.0004840598  
 C,-4.9573138242,-1.2404603235,-0.0000296869  
 C,-5.6946456184,-1.2487626943,-1.1891118349  
 C,-5.6946154658,-1.2486442365,1.1890711602  
 C,-7.0886581668,-1.2611023225,-1.2034864287  
 C,-7.0886280699,-1.2609808944,1.2034826629  
 C,-7.7884374428,-1.2677780874,0.00000753  
 F,5.063424951,-1.2420793861,2.3748113507  
 F,7.7635482002,-1.2659764021,2.3672383115  
 F,9.1321823779,-1.278534093,-0.000131473  
 F,7.7635660075,-1.2641920898,-2.3675032373  
 F,5.0634449195,-1.2403224901,-2.3750814236  
 F,-0.0001526246,3.8225034903,-2.3753674155  
 F,-0.0000881508,6.5215150227,-2.3668359487  
 F,0.0002968964,7.8896327762,0.0005898893  
 F,0.0006055618,6.5211486644,2.3677993982  
 F,0.0005280895,3.8221353234,2.3759146039  
 F,-5.0632689676,-1.2408560886,2.3749186145  
 F,-7.7633915211,-1.2646228863,2.3673780958  
 F,-9.1320474595,-1.278132211,0.0000247126  
 F,-5.063328678,-1.2410753794,-2.3749746907  
 F,-7.7634518442,-1.2648539275,-2.3673637935  
 Zn,-0.0000377511,-1.2605067556,-0.0000823488  
 O,-0.0000236435,-6.0469209386,-0.0004182938

#### Cartesian Coordination of 2pd

-3371.9147926 hartree

C,-1.2682699399,-4.0388462597,-0.1887881967  
 C,1.2336489771,1.5524768569,0.0247955595  
 C,3.4725486975,1.2672284603,-0.0139498629  
 C,2.7976869291,-0.0127755633,-0.0033238572  
 C,2.7885221777,-2.4984696916,-0.0373113291  
 C,2.4911573996,-4.7344919061,-0.0671856648  
 C,1.2274728878,-4.0550706827,-0.1222456186  
 C,-1.2492183548,1.5570716053,0.0470314289  
 C,-2.5270588187,2.2346552589,0.0905166404  
 C,-2.8225713644,-2.4839777472,-0.1159292797  
 C,-3.493717399,-3.7582635371,-0.1817006466  
 C,-2.8191293963,-0.0015879134,-0.0015892606  
 H,-4.5643469953,-3.8989926618,-0.1835841933  
 H,-2.6619794008,3.3045498633,0.1448610128  
 H,4.5430209242,1.4057085483,-0.0432906128  
 N,1.4350674849,-2.6962128416,-0.0951023018  
 N,-1.4673304238,-2.6826775516,-0.1188303417  
 N,1.4364973843,0.1976365284,0.0132514946  
 N,-1.4571993916,0.2039427059,-0.0044407008  
 C,2.5143353031,2.2266512456,0.0032673716



H,2.6532538848,3.2973507465,-0.0086779359  
 C,3.4565643067,-3.7722320611,-0.0140414704  
 H,4.524240337,-3.9186866054,0.0504433152  
 C,-2.5297914848,-4.7206056868,-0.2331176661  
 C,-3.489126161,1.2788540242,0.0566304165  
 H,-4.5596506323,1.4200943825,0.0651762018  
 C,-0.0251661624,-4.6812647404,-0.1938192467  
 C,-3.4670681872,-1.2345609218,-0.0554117624  
 C,3.4403309253,-1.2489664984,-0.0105042715  
 C,-0.0061358678,2.2035550642,0.0507372222  
 H,2.6596623077,-5.8041027677,-0.0452234855  
 H,-2.6494855896,-5.7920314443,-0.2888854378  
 C,4.9345980166,-1.2560106378,0.0103866871  
 C,5.6789811352,-1.6233993912,-1.1160421846  
 C,5.6517805924,-0.899221413,1.1576419103  
 C,7.0718009955,-1.6389497356,-1.1079782688  
 C,7.0447044552,-0.901565996,1.1877943739  
 C,7.7562882621,-1.2745886613,0.049637776  
 C,-0.0028181509,3.6979535466,0.084543239  
 C,-0.3544212217,4.4546388414,-1.0384211544  
 C,0.3526126151,4.4022316331,1.2399397926  
 C,-0.3576136542,5.8476083347,-1.018751687  
 C,0.3627752139,5.7947470641,1.2821258562  
 C,0.0043450931,6.5189513616,0.1471816819  
 C,-4.9623949721,-1.2341895452,-0.0488240576  
 C,-5.6968169382,-1.484660505,-1.2123945226  
 C,-5.6865398176,-0.9891111294,1.1222077535  
 C,-7.0898948071,-1.493694739,-1.2173782726  
 C,-7.0796605039,-0.9882425325,1.1408921477  
 C,-7.7825389801,-1.2430901182,-0.0346830756  
 F,4.9996456216,-0.5411766119,2.2709755651  
 F,7.7002275048,-0.5552064375,2.3004987755  
 F,9.090837551,-1.2831975171,0.0680032133  
 F,7.753446237,-1.994369901,-2.2022047945  
 F,5.0523276606,-1.9747024673,-2.2466235484  
 F,-0.7034750106,3.8403208466,-2.1763506721  
 F,-0.6987039897,6.541933648,-2.109604401  
 F,0.0075971344,7.8534557925,0.1765762118  
 F,0.7074281798,6.438030758,2.4026974677  
 F,0.6988678862,3.7364156897,2.349095326  
 F,-5.0406253475,-0.7439287318,2.2695358924  
 F,-7.7437000596,-0.7499720135,2.2768713497  
 F,-9.1173313459,-1.2465576258,-0.0280143855  
 F,-5.060293263,-1.7264159695,-2.3655283238  
 F,-7.7637084028,-1.7350002816,-2.3469293112  
 Pd,-0.0138319995,-1.2416330619,-0.0528852584  
 O,-0.1026380589,-6.0396077476,-0.2595948865  
 H,0.7780315219,-6.4145290342,-0.379849816

#### Cartesian Coordination of 2pd<sup>-</sup>

-3371.5975289 hartree  
 C,-1.2648168137,-4.064564466,-0.0004653267  
 C,1.2455510128,1.5614528514,-0.0002240686  
 C,3.4891784011,1.2769543719,-0.0001661493  
 C,2.8179216887,-0.0010048886,-0.0003435703  
 C,2.8167730675,-2.5000559253,-0.0003778368  
 C,2.5177885154,-4.7355845275,-0.0003677528  
 C,1.2648097225,-4.0646237193,-0.0004309983  
 C,-1.2452878311,1.5615110134,-0.0001333867  
 C,-2.5246631681,2.2391215907,0.0000923744

C,-2.8167036423,-2.4999229445,-0.000372416  
 C,-3.4910572618,-3.7630017849,-0.0002969889  
 C,-2.8177308653,-0.0008695711,-0.0001844935  
 H,-4.5632933142,-3.9033855169,-0.0001660975  
 H,-2.6649577167,3.3110125523,0.0002665341  
 H,4.5607302409,1.4210134398,-0.0000690503  
 N,1.4523097622,-2.7113561481,-0.000479052  
 N,-1.4522521343,-2.711290218,-0.0005728189  
 N,1.4499288685,0.2087608659,-0.0004579832  
 N,-1.4497297867,0.208831146,-0.0003296564  
 C,2.5249603303,2.2389987048,-0.0000919502  
 H,2.6653069546,3.310882423,0.0000727122  
 C,3.4910644448,-3.7631671242,-0.000205657  
 H,4.5632936141,-3.9036021978,-0.0000602434  
 C,-2.5178286338,-4.7354664521,-0.00042357  
 C,-3.4889268634,1.2771225966,0.0000680425  
 H,-4.5604718943,1.4212305816,0.0002160813  
 C,-0.000199893,-4.7865030952,-0.000441929  
 C,-3.4493777193,-1.2381712371,-0.0002358058  
 C,3.4495096852,-1.2383356138,-0.0003457604  
 C,0.000146321,2.2088186334,-0.0001126563  
 H,2.6249675284,-5.8103098414,-0.0003517992  
 H,-2.6250631366,-5.8101861129,-0.0004053095  
 C,4.9478863816,-1.2418536037,-0.0001550189  
 C,5.6846654173,-1.2502589686,-1.1896302974  
 C,5.6843550771,-1.2506249106,1.189510835  
 C,7.0786979303,-1.2636359431,-1.2035308809  
 C,7.078382901,-1.264010457,1.2037722939  
 C,7.7781441222,-1.2709884911,0.0002106152  
 C,0.0001783257,3.7043866335,0.0001544122  
 C,0.000043708,4.4451410819,-1.1885061536  
 C,0.0003371289,4.4447136203,1.1890815627  
 C,0.0000720633,5.8392848151,-1.2030212222  
 C,0.0003726713,5.8388518666,1.2040970747  
 C,0.0002423831,6.5388770122,0.0006637908  
 C,-4.9477550294,-1.2416201422,-0.000025433  
 C,-5.6845465367,-1.2501489633,-1.1894930196  
 C,-5.6842121277,-1.2502046114,1.1896480248  
 C,-7.0785792099,-1.2634685679,-1.2033778563  
 C,-7.078240986,-1.2635226027,1.2039252385  
 C,-7.778014184,-1.2706284815,0.0003720082  
 F,5.0525474878,-1.2427066116,2.374501961  
 F,7.7530109072,-1.2683983763,2.3674665332  
 F,9.1215095494,-1.2823913818,0.0003844251  
 F,7.7536293245,-1.2676711328,-2.3670503982  
 F,5.0531692994,-1.2419888925,-2.3747864694  
 F,-0.0001142361,3.8154669531,-2.3751069775  
 F,-0.0000562113,6.5149017187,-2.3665387006  
 F,0.0002715227,7.8823847842,0.0009067036  
 F,0.000529868,6.5140513059,2.3678568262  
 F,0.0004656676,3.8146130286,2.3754562046  
 F,-5.052393256,-1.2421661772,2.3746333366  
 F,-7.7528567482,-1.2677306428,2.3676273821  
 F,-9.1213801544,-1.2819701234,0.0005600325  
 F,-5.0530610713,-1.2420502083,-2.3746550559  
 F,-7.75352331,-1.2676202975,-2.3668895889  
 O,-0.0000495283,-6.0375862366,-0.0003733332  
 Pd,0.0000707354,-1.2519343823,-0.0008576431

#### Cartesian Coordination of 2pt

-3364.3565272 hartree  
 C,-1.2687725812,-4.0397954415,0.0972705115  
 C,1.2335288713,1.5519942046,-0.0287366007  
 C,3.4714196109,1.2625176461,-0.0071209718  
 C,2.7973072912,-0.0159866095,-0.0255073864  
 C,2.7857418694,-2.4978701276,-0.0212577559  
 C,2.4866082174,-4.7330213288,-0.0129273996  
 C,1.2222107871,-4.0564346013,0.0389410173  
 C,-1.245794137,1.5587226087,-0.0408556107  
 C,-2.5226135899,2.2356548198,-0.064473871  
 C,-2.8231406487,-2.4809176568,0.0536816799  
 C,-3.4933543447,-3.7555334221,0.0930759458  
 C,-2.8179075088,-0.0006843873,-0.0137470333  
 H,-4.5640326738,-3.8946166993,0.0908177991  
 H,-2.6563413723,3.3064421732,-0.0970826702  
 H,4.5421460666,1.399092337,0.0158301047  
 N,1.4276407981,-2.6939807468,0.0249024662  
 N,-1.4638743852,-2.6791359946,0.0546180654  
 N,1.4330307868,0.1932609184,-0.0310575876  
 N,-1.4526339203,0.2011589344,-0.0140181076  
 C,2.5143549602,2.2224782487,-0.009007287  
 H,2.6537885507,3.2928464823,0.0113709358  
 C,3.451670433,-3.7712936158,-0.0508160817  
 H,4.5197750708,-3.9165434036,-0.1075799659  
 C,-2.5311637354,-4.7189068132,0.1256409141  
 C,-3.4849058796,1.2805055391,-0.0440821875  
 H,-4.5552486167,1.4221669394,-0.04435099  
 C,-0.0285836257,-4.6834362505,0.0944821785  
 C,-3.4660676424,-1.2328577434,0.0181356921  
 C,3.4378393138,-1.25158468,-0.0333032156  
 C,-0.004094892,2.2032168535,-0.040031867  
 H,2.6553909552,-5.8023014165,-0.0400028153  
 H,-2.6513883464,-5.7910471911,0.1594835933  
 C,4.9324538594,-1.2595703197,-0.0546652641  
 C,5.6485579762,-0.9120680426,-1.205140566  
 C,5.676470896,-1.6178712056,1.0746223151  
 C,7.0414986464,-0.9149355591,-1.2357895963  
 C,7.0693491354,-1.6334504886,1.0661829279  
 C,7.753324271,-1.2786647637,-0.0947303454  
 C,0.0001546987,3.6982791371,-0.051202536  
 C,0.3312577137,4.4193475901,-1.2032157606  
 C,-0.326290351,4.4371186354,1.0908351541  
 C,0.3417518977,5.8123855927,-1.2241284975  
 C,-0.3281565163,5.8302554418,1.0927053228  
 C,0.0090001954,6.5191147592,-0.0704710049  
 C,-4.9615083612,-1.231097944,0.0148222048  
 C,-5.6875291435,-0.9681364401,-1.1510723923  
 C,-5.6933199454,-1.4976583157,1.1763712414  
 C,-7.0806901438,-0.9655822566,-1.1666757747  
 C,-7.0864111921,-1.505116134,1.1841722307  
 C,-7.7812493255,-1.2366515641,0.0066778825  
 F,5.0495458604,-1.9606046555,2.2074694136  
 F,7.7513843212,-1.9802027001,2.1628686403  
 F,9.0878223716,-1.2875667403,-0.113509405  
 F,7.6967052455,-0.5775547564,-2.3513766786  
 F,4.9953303157,-0.562337409,-2.3203023027  
 F,0.6532315825,3.769917639,-2.3291017521  
 F,0.6626652696,6.4726777041,-2.3417767388  
 F,0.0130350046,7.8538517985,-0.0793197225  
 F,-0.6448659342,6.5079768481,2.2011224527

F,-0.6517494008,3.8050133576,2.2258048408  
 F,-5.0543703226,-1.7571237072,2.3241344502  
 F,-7.758105397,-1.7621640717,2.3114497052  
 F,-9.1160065596,-1.2385841772,0.0028618475  
 F,-5.043528026,-0.7066763121,-2.2957135195  
 F,-7.7469278816,-0.7100362215,-2.2975430213  
 O,-0.108028693,-6.0427341462,0.1370498362  
 H,0.7730150807,-6.4219911308,0.2386986928  
 Pt,-0.0143972406,-1.2424450874,0.0098981307

#### Cartesian Coordination of 2pt<sup>-</sup>

-3364.0371422 hartree  
 C,-1.2605803186,-3.8458065334,-0.0002468628  
 C,1.2431542052,1.7768891359,0.0001538069  
 C,3.4853906517,1.4905085951,0.0001078923  
 C,2.8158098722,0.2133544871,0.0000015544  
 C,2.813964085,-2.2803489388,-0.0002094647  
 C,2.5139378995,-4.5142146675,-0.0003870657  
 C,1.2606055015,-3.845798795,-0.0003029946  
 C,-1.2431639421,1.7768814519,0.0001437064  
 C,-2.5216932123,2.4521664142,0.0001978357  
 C,-2.8139486882,-2.2803663743,-0.0001258893  
 C,-3.4867589534,-3.5433661228,-0.0001929114  
 C,-2.8158098991,0.2133370616,0.0000347882  
 H,-4.5588230455,-3.6831618376,-0.0001879775  
 H,-2.6615458555,3.5239294971,0.000282232  
 H,4.5568446453,1.6336871429,0.000108182  
 N,1.4452715703,-2.489370375,-0.0002062954  
 N,-1.4452548097,-2.4893793443,-0.0001456071  
 N,1.4454997704,0.4206473582,0.000044249  
 N,-1.4455010829,0.4206384316,0.0000367396  
 C,2.5216793255,2.4521820374,0.0001980464  
 H,2.6615252607,3.5239459984,0.0002820849  
 C,3.4867822543,-3.5433444563,-0.0003308466  
 H,4.5588472094,-3.6831335257,-0.0003643642  
 C,-2.5139085713,-4.5142302618,-0.0002695544  
 C,-3.4853985989,1.4904869662,0.0001216462  
 H,-4.5568534724,1.6336589231,0.0001324394  
 C,0.0000148474,-4.5686647986,-0.0003204236  
 C,-3.4474720108,-1.0226488636,-0.0000421011  
 C,3.4474796727,-1.0226274627,-0.0001141206  
 C,-0.0000068331,2.4235443629,0.0002024742  
 H,2.6200561757,-5.5889476332,-0.0004720789  
 H,-2.6200200804,-5.588963893,-0.0003392898  
 C,4.945684186,-1.0263866575,-0.0001392258  
 C,5.6820545369,-1.0345163446,-1.1898252819  
 C,5.6820931871,-1.0348531782,1.1895208492  
 C,7.0760922584,-1.0475060625,-1.2038673463  
 C,7.0761311791,-1.0478468662,1.2035138979  
 C,7.7756714881,-1.0546333137,-0.0001891885  
 C,-0.0000114711,3.9192098368,0.0003219791  
 C,-0.0001428099,4.6593427531,-1.1885724186  
 C,0.0001152688,4.6591522476,1.1893352308  
 C,-0.0001496527,6.0534900795,-1.2031234045  
 C,0.00011346,6.0532971687,1.2041087672  
 C,-0.0000202655,6.7531418492,0.0005487788  
 C,-4.9456765142,-1.026417283,-0.0000318078  
 C,-5.6820741187,-1.0346825122,-1.1897002717  
 C,-5.6820581292,-1.0347572637,1.1896458837  
 C,-7.0761119417,-1.0476828268,-1.203708838

C,-7.0760958633,-1.0477574427,1.203672435  
C,-7.7756636267,-1.0546812891,-0.000013655  
F,5.0503083681,-1.0267226507,2.3743912414  
F,7.7508907698,-1.0518802419,2.3670693998  
F,9.1190004111,-1.0655656706,-0.0002126826  
F,7.7508138334,-1.0512128393,-2.3674460698  
F,5.0502314559,-1.0260595639,-2.3746735756  
F,-0.0002630144,4.0292302131,-2.3747712277  
F,-0.0002760588,6.7288599964,-2.3666478774  
F,-0.0000244117,8.0965587901,0.0006572594  
F,0.0002357221,6.7284813848,2.3677409315  
F,0.000239463,4.0288500378,2.3754333745  
F,-5.050246299,-1.0264981275,2.3745014547  
F,-7.7508285301,-1.0516687099,2.3672440295  
F,-9.1189924859,-1.0656218654,-0.00000495  
F,-5.0502781206,-1.0263465415,-2.3745633875  
F,-7.7508603788,-1.0515199636,-2.3672714942  
O,0.0000186742,-5.8205904111,-0.0004218405  
Pt,0.0000038576,-1.0332907116,-0.0000707993

#### Cartesian Coordination of 2ni<sup>-</sup>-TBA<sup>+</sup>

-4100.5891076 hartree

C,1.3537173987,-2.6502832847,-2.6436196318  
C,2.5919580981,-3.3423376683,-2.6066811337  
C,3.4549510083,-2.572247776,-1.8548998621  
C,2.7364421256,-1.3931123823,-1.4869716699  
C,3.3101659893,-0.2192501051,-0.9711293648  
C,2.6334101757,0.9831334672,-0.8762364788  
C,3.2409292923,2.2692584569,-0.6475533683  
C,2.2359667902,3.1916327191,-0.649813823  
C,0.9973318845,2.4648630741,-0.8163348965  
C,-0.2706671931,3.0027405941,-0.5748133556  
C,-1.4076854306,2.2010172909,-0.4525372005  
C,-2.6707930514,2.6348795674,0.1031181851  
C,-3.4932091079,1.5498248311,0.1267625739  
C,-2.7741148483,0.4599821424,-0.4873965237  
C,-3.3319633649,-0.740505327,-0.8865853911  
C,-2.6722439142,-1.6658788888,-1.7185090336  
C,-3.3015011682,-2.7367068851,-2.4220129984  
C,-2.3218397183,-3.3405380864,-3.1834374005  
C,-1.1103513132,-2.658878873,-2.9045024906  
C,0.1798338515,-3.1665953508,-3.3251089146  
C,4.7470442774,-0.2590569277,-0.5782439184  
C,5.1181832955,-0.4146805602,0.7582674392  
C,6.4466860499,-0.4868269382,1.1640657695  
C,7.4562014385,-0.3961667536,0.2085736836  
C,7.1241686213,-0.2340257928,-1.1353343318  
C,5.7834840878,-0.168884831,-1.5117291628  
C,-0.3776672977,4.4631581738,-0.3112566622  
C,-0.5579259994,4.9865536209,0.9730924786  
C,-0.6448738033,6.3539089715,1.2190878618  
C,-0.54030369,7.2493151808,0.1574194296  
C,-0.3537719764,6.76696102,-1.1360404135  
C,-0.2777634907,5.3928730121,-1.3530784209  
C,-4.7384597183,-1.0490949195,-0.5069411462  
C,-5.8334764159,-0.3763581988,-1.0593609207  
C,-7.1464024188,-0.6725907652,-0.6963776914  
C,-7.3944430811,-1.6753212545,0.2383047346  
C,-6.327774532,-2.375067999,0.7980190614  
C,-5.0290513867,-2.0572146436,0.4164558605

C,-0.9609374588,-1.911017492,3.3008031403  
C,-2.0746352652,-0.9365758394,2.9281807662  
C,-3.2607811542,-1.0653118975,3.8924007818  
C,-4.3724939536,-0.0623247244,3.5692419348  
C,-0.4125607072,-2.7545825105,1.0109467206  
C,-1.0178058114,-4.1341639391,1.2604006927  
C,-1.2357750297,-4.891188117,-0.0613848263  
C,0.0541810933,-5.4408147847,-0.6763653257  
C,1.2629577315,-2.8728107069,2.868973484  
C,2.3496484538,-3.3001106286,1.8860465344  
C,3.6123965657,-3.7630312413,2.6244297828  
C,4.7177796503,-4.1831035802,1.6512145654  
C,0.6477286272,-0.6839130284,1.8332545119  
C,1.177977181,0.1892879236,2.9646651826  
C,1.5013445352,1.5918821675,2.4385846633  
C,1.9950647696,2.5307267551,3.5392322857  
F,4.1668509134,-0.5185629158,1.7127540335  
F,6.7582656299,-0.6491232408,2.4595984523  
F,8.7395337663,-0.4625174592,0.5804935521  
F,8.0954442332,-0.1405254414,-2.0526144467  
F,5.5010218548,-0.0066962234,-2.8110462029  
F,-0.6464379075,4.1577808643,2.0329518173  
F,-0.8177051547,6.8141141028,2.4681440791  
F,-0.6185844964,8.5669265125,0.379697381  
F,-0.2550090041,7.6272358116,-2.1591822034  
F,-0.1044995268,4.9668601838,-2.6136451884  
F,-5.6403157502,0.5804885934,-1.9788127797  
F,-8.1712415284,-0.0050449835,-1.242826409  
F,-8.649922335,-1.9650067183,0.5981518555  
F,-6.5571444374,-3.3358267951,1.7066735366  
F,-4.0239497572,-2.7509163347,0.9934156845  
H,2.7706132784,-4.2871420791,-3.0982401227  
H,4.4924993388,-2.7702439785,-1.626312057  
H,4.3008195186,2.4411580883,-0.5225247984  
H,2.3164185599,4.2597248978,-0.5089488367  
H,-2.8916224978,3.6360478908,0.4424147732  
H,-4.512139045,1.5048472323,0.4821364808  
H,-4.3517971997,-2.9871601246,-2.3702935616  
H,-2.3972493052,-4.1912093078,-3.8443055567  
H,-1.3617768809,-2.9121993808,3.4609065611  
H,-0.4690770303,-1.6051535152,4.2258808279  
H,-2.4251671696,-1.1223452536,1.9110433749  
H,-1.7048682876,0.0934449922,2.9482953451  
H,-3.6597386599,-2.0863007794,3.8415929352  
H,-2.9172440613,-0.9133144826,4.9245437238  
H,0.4135536051,-2.7916480892,0.3040607234  
H,-1.1569471273,-2.0883487882,0.5808545813  
H,-1.9801581628,-4.0259956632,1.7680257963  
H,-0.3727824227,-4.7393171234,1.9081428339  
H,-1.925574219,-5.7199226263,0.1350632367  
H,-1.7441661328,-4.2372211011,-0.7744952755  
H,0.8007636297,-3.7412915773,3.3411000346  
H,1.6813911345,-2.2545017743,3.6634930719  
H,1.9865800763,-4.1102963707,1.2467179023  
H,2.6181099428,-2.4761084143,1.2210131188  
H,3.3674320237,-4.6004306592,3.291551741  
H,3.9772388883,-2.9486207026,3.2631166803  
H,1.4191315108,-0.8578041521,1.0858187582  
H,-0.1803677504,-0.1971915537,1.3197291285  
H,2.0857379145,-0.2420949559,3.3993709589

H,0.4421639623,0.2789422047,3.7715093916  
H,2.2602088186,1.5131581269,1.6577924736  
H,0.6107213982,2.0146342628,1.9654269625  
H,-5.2093646918,-0.1625870631,4.2669316045  
H,-4.0035788434,0.9674679066,3.626160974  
H,-4.7578882802,-0.2173936741,2.5562915494  
H,-0.1456984037,-5.9116266903,-1.6427949161  
H,0.7917729744,-4.6556260334,-0.8644781333  
H,0.5144537999,-6.1896699467,-0.0196699528  
H,5.6159268775,-4.503367994,2.1877387697  
H,4.3903915069,-5.0103111007,1.0122102943  
H,4.9942277938,-3.3514544797,0.9947354406  
H,2.224331104,3.5187106033,3.1286853974  
H,1.2379925636,2.6653136191,4.320616196  
H,2.905407999,2.1447904595,4.0130979328  
N,1.4274879305,-1.4789731464,-1.9386448693  
N,1.2590969817,1.1304586162,-1.0071529767  
N,-1.4787914653,0.8700695383,-0.7912522413  
N,-1.3255549175,-1.6239162942,-2.0255645257  
N,0.1333482666,-2.0572651491,2.2564697575  
Ni,-0.0322765367,-0.2635679101,-1.4677260764  
O,0.2757854218,-4.1006417274,-4.1426763603

#### Cartesian Coordination of 2ni<sup>-</sup>-TATA<sup>+</sup>

-4663.907739 hartree

C,0.3613297225,-3.1205654403,1.1924806808  
C,-0.9714310692,-2.5784494536,1.2553985253  
C,-2.1018217902,-3.4006922517,1.5068180502  
C,-3.1793952234,-2.558080472,1.6421839235  
C,-2.6898627792,-1.2313062464,1.4352274574  
C,-3.4888673523,-0.081421014,1.4019613741  
C,-3.0254825805,1.1606124983,1.0157669592  
C,-3.8705262798,2.2941909,0.7409391438  
C,-3.079501231,3.2531575438,0.1832499745  
C,-1.7344170318,2.7274337235,0.1657510697  
C,-0.616183905,3.4626330159,-0.2299108133  
C,0.6822623434,3.0546165239,0.0617228018  
C,1.84105238,3.9124259673,-0.0467362619  
C,2.8826079552,3.2398904343,0.512388809  
C,2.3907549209,1.9364847444,0.8907201855  
C,3.1719871251,0.9101967981,1.3859793991  
C,2.7169442453,-0.4156321671,1.513974314  
C,3.5554416895,-1.5373760083,1.8017837501  
C,2.7749763484,-2.6626754635,1.6625487714  
C,1.4712748012,-2.213911966,1.3277339118  
C,-4.936655358,-0.2254059112,1.7295033398  
C,-5.4334502201,0.1416453039,2.9835399113  
C,-6.780961979,0.0122758249,3.3148101525  
C,-7.6730099513,-0.5003334565,2.3759133535  
C,-7.2105835121,-0.877138904,1.1171049628  
C,-5.8597795043,-0.7347141843,0.8137100456  
C,-0.8414863459,4.7898825906,-0.8638832669  
C,-0.7141001719,5.9918367066,-0.1590447927  
C,-0.9426554634,7.2308910253,-0.7541161928  
C,-1.3220113019,7.2918482603,-2.093241134  
C,-1.4663431423,6.1151236052,-2.8245181532  
C,-1.224734829,4.8928938756,-2.204201578  
C,4.5856817687,1.1902088144,1.7655672338  
C,4.9906399373,1.1117212906,3.1051494137  
C,6.307648107,1.3313879191,3.5015483135

C,7.2725225788,1.6467826812,2.5471993023  
C,6.90592179,1.7417401529,1.2079832395  
C,5.5824764928,1.5149836721,0.8410828807  
C,0.6713201541,-2.872517847,-1.9743264001  
C,-0.6726677159,-3.3045378746,-2.0149963786  
C,-0.9836441023,-4.6718786627,-1.7608333063  
C,-2.3321352015,-5.0517589808,-1.6846994014  
C,-3.3245544125,-4.0971703712,-1.8889435908  
C,-3.0434034075,-2.770959488,-2.2026586337  
C,-1.7070984801,-2.3601443099,-2.2826794926  
C,0.9762543179,-1.5053344721,-2.1548675736  
C,-0.0639023753,-0.5854010357,-2.4831959574  
C,0.2492979615,0.7672710022,-2.6552601388  
C,1.5701845474,1.1797027013,-2.5067274484  
C,2.6051946577,0.303031237,-2.1986774265  
C,2.3201384268,-1.0552159789,-2.0052057635  
C,1.7011598532,-3.800655555,-1.7126401699  
C,3.0442445086,-3.3399389141,-1.5845875102  
C,4.0624119748,-4.2759548848,-1.3535484842  
C,3.7283658064,-5.6177098303,-1.1954365733  
C,2.4194883406,-6.0830325716,-1.2622435267  
C,1.3807292131,-5.17880276,-1.5274980454  
C,-0.2707762669,-6.9920301572,-1.3716484005  
C,-0.4623162775,-7.3181071286,0.1127768004  
C,-0.7227183859,-8.8105971082,0.32589879  
C,4.6613084442,-1.500414633,-1.3916407203  
C,5.5595216116,-1.4606024921,-2.6302918816  
C,6.9767887923,-1.0034065132,-2.2729053614  
C,-2.3707266453,-0.2069115633,-3.2775397016  
C,-3.1568495627,0.6700974631,-2.3062351442  
C,-4.2522955254,1.4591986998,-3.0231701324  
F,-4.6023577667,0.6327120592,3.9146179824  
F,-7.224769399,0.3741571917,4.5267269751  
F,-8.9699616548,-0.6305022607,2.6809543314  
F,-8.0676127503,-1.3690202302,0.2083092715  
F,-5.4554925473,-1.1037434707,-0.4182507804  
F,-0.3702952742,5.9744470027,1.138136893  
F,-0.8102523236,8.3633844587,-0.0484417999  
F,-1.5475107764,8.4761357941,-2.6751476239  
F,-1.8303501008,6.1692049976,-4.1151640218  
F,-1.3689714043,3.7770559021,-2.9490226703  
F,4.0939986634,0.8251886163,4.0591682776  
F,6.6535192068,1.2473758729,4.793392625  
F,8.5416588491,1.8602948038,2.9149804963  
F,7.8277351567,2.0400078709,0.2783200812  
F,5.2886335338,1.6096592198,-0.4752701934  
H,-2.0579183003,-4.474975718,1.597322742  
H,-4.2065838689,-2.8195645748,1.8524087932  
H,-4.9344284803,2.3348004486,0.9260041518  
H,-3.3663281434,4.2368577836,-0.1591850555  
H,1.8403197818,4.9147742939,-0.4493973665  
H,3.895749657,3.5895897766,0.6429621423  
H,4.6044036651,-1.4852226049,2.0566496846  
H,3.0426267171,-3.7012044298,1.7861709857  
H,-2.6227474845,-6.0585672376,-1.4257334896  
H,-4.3629565866,-4.3959729731,-1.78518145  
H,-3.8556230165,-2.0696556324,-2.321681425  
H,-0.5142875758,1.505787491,-2.8431917699  
H,1.8000943199,2.2346479533,-2.609421945  
H,3.6043559255,0.6949411747,-2.0931994505

H,5.0988902839,-3.981460695,-1.2881856288  
H,4.5230129713,-6.3303381398,-0.9962552465  
H,2.2285119429,-7.1274771163,-1.0697908946  
H,-1.1648860661,-7.2317911529,-1.9493944655  
H,0.5254686284,-7.5980201752,-1.80634644  
H,-1.2918794431,-6.7218611902,0.505421804  
H,0.418552901,-6.9852872683,0.6686031219  
H,-1.620982996,-9.14360962,-0.2082760841  
H,-0.8662242427,-9.0338737088,1.3872368041  
H,0.1181021404,-9.418284371,-0.0299966206  
H,5.0830243129,-2.1400329592,-0.6161429847  
H,4.5762009226,-0.5159183939,-0.9410840497  
H,5.1188000065,-0.7848228893,-3.3722373788  
H,5.5855255691,-2.4543664239,-3.0923462318  
H,6.972258071,0.0008124497,-1.8367158018  
H,7.6181363016,-0.9796204115,-3.1588777487  
H,7.439537108,-1.6815120638,-1.5458728659  
H,-1.852652179,0.4071611839,-4.0187331392  
H,-3.0412482151,-0.8656851807,-3.8348923085  
H,-3.5883375949,0.0465129678,-1.5211022195  
H,-2.4717888329,1.3548486289,-1.8071955251  
H,-3.8315860479,2.1180620986,-3.7916976463  
H,-4.7953394537,2.085657314,-2.3103463405  
H,-4.9764137197,0.7937559777,-3.5084816634  
N,-1.3240100785,-1.2530588434,1.2062156144  
N,-1.711280285,1.4522908148,0.6726010937  
N,1.0342269173,1.8440861222,0.6090374857  
N,1.4302176082,-0.8413975085,1.2408658403  
N,0.05570376,-5.5789202737,-1.6085400951  
N,-1.3572251909,-1.0659636691,-2.6390088952  
N,3.3016310641,-1.9799604703,-1.6722489847  
Ni,-0.1413337225,0.2973550328,0.9206685256  
O,0.5433551392,-4.3596344869,1.1002016385

#### Cartesian Coordination of 2pd<sup>-</sup>-TBA<sup>+</sup>

-4058.0146375 hartree

C,7.2897249236,12.7004874221,-0.7766434209  
C,6.2000447668,12.076242751,-0.1732694117  
F,7.112931413,13.4406182174,-1.877027771  
F,4.9704330662,12.2194364906,-0.6928320562  
C,8.5632080366,12.5505928149,-0.2310857181  
F,9.6102555899,13.1495813258,-0.8133598753  
C,7.9795909004,11.4283849235,7.607534556  
C,7.819848415,11.5125042493,6.1644512439  
C,7.581944832,12.7388062058,5.4860733629  
C,7.5039221555,12.4455888012,4.1398238633  
C,7.7145037785,11.0362856022,4.0087284477  
C,7.8357057193,10.3352364695,2.7911021485  
C,8.0959169728,8.9821447892,2.6508912589  
C,8.3181382222,8.2926286803,1.4008993746  
C,8.3027155889,6.8215493767,3.1223486586  
C,8.2160746037,5.5979313908,3.7987066838  
C,7.9650253916,5.455841938,5.1694282368  
C,7.7365688333,4.1937758302,5.8432530504  
C,7.5048615611,4.4721703454,7.1564342103  
C,7.6195327371,5.903401407,7.3203487495  
C,7.5379547468,6.591237295,8.5218444163  
C,7.7249402673,7.9799535699,8.6953386778  
C,7.8140475315,8.6549192254,9.9531907537  
C,7.9947440773,9.9938410909,9.6796340678

C,7.9951263786,10.1324639582,8.2657044407  
C,7.6625130852,11.1382745182,1.5445616153  
C,6.402990216,11.3080345511,0.9684264803  
C,8.3198786331,4.3560581586,2.9810483582  
C,7.2623505155,2.481900116,1.8188122124  
C,7.186309403,3.6357661075,2.5934987539  
C,7.2213400659,5.812615402,9.7528760045  
C,7.8182785171,4.1913709188,11.481198133  
C,6.579925479,4.3642882266,12.0949082562  
C,5.6602345946,5.2598200509,11.5530245543  
C,5.9918537552,5.9663293217,10.4019632053  
C,3.0608066279,7.9910125332,6.2697849641  
C,3.9147409212,6.7988283411,6.6897590886  
C,3.0580034656,5.7642267109,7.4335765983  
C,3.8280420637,4.4704297367,7.7110043787  
C,4.7368518807,8.6720662239,4.5460144241  
C,4.0047070559,8.0333371047,3.3718846567  
C,5.0026791447,7.3728875851,2.4146099326  
C,4.3175475386,6.7054572124,1.2221555284  
C,2.8261106711,10.1644761171,5.133879257  
C,3.4272455315,11.3619065763,4.4049253126  
C,2.326019827,12.3307080299,3.9528798459  
C,2.9016800079,13.513571298,3.1680038815  
C,4.7131258813,9.8041451221,6.7454044148  
C,3.9740820882,10.1912438411,8.0295672142  
C,4.6543205417,11.3492587565,8.7807175037  
C,4.6102075623,12.685338386,8.0339623475  
F,5.3232603542,10.716206618,1.5256937983  
F,6.1496622345,1.8189672747,1.4666882081  
F,5.9619936999,4.0562390752,2.969577913  
F,6.2739654439,3.6740615474,13.199590561  
F,4.4624967273,5.4254400756,12.1349660863  
F,5.0679778443,6.8135377477,9.9029019843  
H,7.5097079728,13.696692607,5.9795436327  
H,7.351893859,13.1348473045,3.3212107266  
H,7.7507621503,3.2238090072,5.3679897816  
H,7.2958909302,3.7680794859,7.9483507616  
H,7.766380315,8.1802864474,10.9228941639  
H,2.5106086257,8.3929342941,7.1210184743  
H,4.3615902236,6.3215737846,5.8119425052  
H,2.1628123032,5.5342634794,6.8394178046  
H,4.1523631498,3.9974139427,6.7779659949  
H,5.3288034656,9.5292924022,4.2281688643  
H,3.4235154732,8.783012432,2.8230899147  
H,5.7085124263,8.1263775138,2.0590155614  
H,3.6300815586,5.9156429404,1.5466162115  
H,2.2277610651,10.4921037995,5.9848068985  
H,4.1294129711,11.9012979131,5.0468073963  
H,1.7769658769,12.6985383016,4.8297057115  
H,3.6194552507,14.0752104145,3.7758959437  
H,5.5129136283,9.0971031835,6.9556290083  
H,2.3263080145,7.6880631019,5.5224351735  
H,4.7404474312,7.1119432363,7.3346105347  
H,2.7055674134,6.1972418318,8.3779075762  
H,3.20857536,3.7537727546,8.2590173954  
H,4.725402129,4.6671516474,8.303441975  
H,5.435115079,7.9715935284,5.0005355025  
H,3.2992556295,7.2703697716,3.7199103457  
H,5.5896814047,6.6308092532,2.9633378721  
H,5.0585227891,6.2476858627,0.5597114906

H,3.7450639752,7.4317480161,0.6331489421  
H,2.1662012371,9.6072023222,4.4667019937  
H,3.9888006854,11.0353511808,3.5263720642  
H,1.5972891383,11.7951550068,3.3296317278  
H,2.1118515648,14.2033324453,2.8556338479  
H,3.4227736591,13.1686677459,2.2681270183  
H,5.1810667802,10.6607999507,6.2669092265  
H,2.9434479407,10.4954615362,7.8140691914  
H,3.9156723535,9.3190380695,8.6894089313  
H,5.6894635092,11.0869380663,9.007342752  
H,4.1470848215,11.4550194381,9.7467847225  
H,5.1764649386,12.6519844353,7.0982406502  
H,5.0656055357,13.4737117682,8.6384227166  
H,3.5776769722,12.9789518292,7.8033613897  
N,7.8829467201,10.4836312541,5.2643260934  
N,8.1193010316,8.0571395624,3.6818359065  
N,7.8848662423,6.4726733406,6.0837595696  
N,7.8486162301,8.9034485331,7.6764426194  
N,3.8322618912,9.1584091684,5.672191513  
O,8.0228516472,12.4739779669,8.2885864122  
Pd,7.9632556677,8.4770295328,5.6786572355  
C,8.4566815234,6.9674215618,1.6891081342  
C,8.7337194997,11.7789855992,0.9175365396  
C,9.5538607877,3.8611015294,2.547715852  
C,9.6609305459,2.71141864,1.7674427528  
C,8.5085672885,2.0190131229,1.4020831028  
C,8.1241755993,4.9135260968,10.3288414203  
F,9.9704225303,11.6591093312,1.4197412317  
F,10.6850354471,4.5003290956,2.8830295274  
F,10.8600352042,2.2649469954,1.3682750955  
F,8.5981399155,0.9119932239,0.6549514283  
F,9.3344099512,4.7309494693,9.7793138775  
F,8.706651784,3.3359787998,12.0050690017  
H,8.3631047791,8.7658344392,0.4301840012  
H,8.6313326531,6.156604846,0.9969090302  
H,8.0991015666,10.8205783841,10.3664838385

#### Cartesian Coordination of 2pd<sup>-</sup>-TATA<sup>+</sup>

-4621.3334537 hartree

C,-0.4796513125,4.9877098,-0.3049318451  
F,-1.798741005,4.7737092339,-0.4070944449  
F,-0.4498294306,5.9666396049,-2.4604487452  
F,-0.4804594012,4.0321602901,1.8347347976  
C,4.8305096421,-0.49032348,6.3641630574  
C,3.6375476446,-1.2373838364,3.8035936206  
C,2.7191484431,-2.0496135201,4.4834960835  
C,2.5460703972,-3.3988374901,4.1829493014  
C,3.2950021394,-3.9799974908,3.1620700676  
C,4.2067119119,-3.202559722,2.4534460419  
C,4.3609391095,-1.8586329437,2.7811558406  
C,8.6504220872,-0.6456978689,3.3522165902  
C,8.4500385989,-2.1575552655,3.212971234  
F,1.9611102496,-1.5290565386,5.4598245317  
F,1.65953715,-4.1408933938,4.8609920914  
F,3.1382965944,-5.2753661525,2.8635680444  
F,4.9370574329,-3.7520064574,1.4698245532  
F,5.2634346811,-1.1535929587,2.0627760485  
H,5.6479662683,-0.23297255,8.3856338243  
H,4.8115343088,-1.559925931,6.2137639569  
H,2.5755258359,-0.1394180109,1.5715131226

H,8.5085334215,-2.6563595436,4.1877987785  
H,7.5664556614,-0.511201421,5.2385659132  
H,7.4739931109,-2.3889695293,2.7750771109  
C,0.2053373104,5.5978877737,-1.3531798024  
C,1.576403121,5.8208799796,-1.2458277149  
C,2.2426181196,5.429135344,-0.0888075812  
F,2.2421765153,6.4033566729,-2.2548247388  
H,9.215908404,-2.5981430372,2.5679461994  
C,8.8515242954,7.335584104,6.7467918725  
C,8.8592197013,5.9758476551,6.4153760373  
C,9.5509265994,3.6825879019,6.863703356  
C,10.2889388247,2.7459931113,7.6013187486  
C,10.1641199167,1.3925085005,7.3058244987  
C,9.335692278,0.9154483929,6.2958191492  
C,10.500186874,5.5319087481,8.1905320903  
C,9.808140468,5.601594444,9.5555200881  
C,10.7342536344,6.1802360922,10.6274378899  
H,9.3597796173,7.7114757256,7.6220303354  
H,10.9098129791,3.0398660158,8.4337081768  
H,10.7311774796,0.6782867507,7.8949367311  
H,9.2947155792,-0.1467971796,6.1082196842  
H,10.8736165518,6.5128111298,7.8921067105  
H,9.4765706692,4.5983264455,9.8385649094  
H,11.6373685121,5.5701393999,10.7461485463  
H,9.6464630769,-0.4313250244,3.7562950285  
H,11.3774976328,4.8852790519,8.2297228983  
H,8.901521934,6.2096223368,9.4622826337  
H,10.2318799063,6.2196917768,11.5983357005  
H,11.0515277088,7.1988084461,10.3747026969  
N,9.6161497139,5.0453022127,7.1223288903  
C,5.6127687645,6.2334252141,8.0117531212  
C,5.8653786315,5.0391150643,8.651622855  
C,5.3905407194,3.9969509304,7.7928798978  
C,5.4306254865,2.613912478,8.0757014066  
C,5.1025445909,1.594290867,7.1962816577  
C,5.2530755412,0.1837020885,7.4699748318  
C,4.3824313219,0.4977218634,5.4030382279  
C,3.8069620257,0.2006310255,4.1594458529  
C,3.2936458973,1.1561127139,3.2697107725  
C,2.6866929903,0.8499836837,1.9901314709  
C,2.2799165307,2.0302786514,1.444053278  
C,2.6168585068,3.0747219096,2.3831972472  
C,2.3219275588,4.4182175808,2.2211425837  
C,2.6524678602,5.4558236808,3.115237118  
C,2.286129962,6.8313107972,2.9630859737  
C,2.8621536024,7.5170447558,4.010950367  
C,3.5719053974,6.5626560943,4.7895908296  
C,4.4070105575,6.9375907063,5.9173451963  
C,4.9618577628,5.9180424695,6.7882951983  
C,5.7322830077,2.2165754622,9.4841628813  
C,7.0066439217,2.2710300685,10.0449184268  
C,7.2633281704,1.9187854043,11.3667294543  
C,6.2165241313,1.4897331218,12.1771371821  
C,4.9266866346,1.422737111,11.6544406792  
C,4.7004036484,1.7871161475,10.3288375413  
C,1.5894757332,4.8161144735,0.98253836  
C,0.2142761899,4.6086071823,0.8428131232  
C,8.1462998106,8.2290011431,5.9429123502  
C,8.5971639466,1.8271835338,5.5247369743  
C,7.1747303489,2.3156602851,3.6141536133



C,6.4867016014,1.8965114112,2.4719284814  
 C,5.8818297325,2.847244978,1.654927212  
 C,5.9265601049,4.2095766348,1.9221187602  
 C,6.6009119756,4.6625379419,3.0635285876  
 C,7.3734338232,6.4696031944,4.4924026449  
 C,7.4413726325,7.8317265345,4.8160175504  
 C,8.0826521518,5.5326903043,5.3039299491  
 C,8.710405634,3.2205466671,5.8079172052  
 C,7.2597017168,3.711085157,3.8992437066  
 C,8.0070033783,4.1545177075,5.0100718292  
 C,7.587443554,-0.0254284858,4.2625623063  
 C,5.8835191188,6.9652711592,2.5909337872  
 C,6.6947439784,7.5155487011,1.4169906124  
 C,5.8589319389,8.4934842488,0.5860377083  
 F,8.0495506971,2.6694190935,9.2958340785  
 F,8.5129010211,1.9867717204,11.8584603729  
 F,6.4477852014,1.1432287455,13.449448358  
 F,3.9150418634,1.0126727756,12.4321144633  
 F,3.442126246,1.722451452,9.8714859001  
 F,3.5727958508,5.6506927416,-0.0302717499  
 H,5.815462514,7.240969676,8.341975151  
 H,6.3291786704,4.8942742588,9.6165356001  
 H,1.7806284918,2.180690484,0.4975901578  
 H,1.6688395901,7.2306540948,2.1709482077  
 H,2.8247609383,8.5725244865,4.2363928942  
 H,8.1370059848,9.2795147564,6.2140339057  
 H,6.3986650082,0.8550049729,2.2112411054  
 H,5.3359251039,2.5067180156,0.7814742678  
 H,5.4153937509,4.8860905693,1.2574640506  
 H,6.9128578923,8.5775925804,4.2447482186  
 H,6.5919381608,-0.1647232212,3.8496685611  
 H,5.5368535936,7.7655944786,3.2401684297  
 H,7.594883075,8.0118740926,1.7991727517  
 H,4.9717582003,8.0002844575,0.1751817818  
 H,8.6043717957,-0.1660356998,2.368039136  
 H,4.976635045,6.4724707563,2.2483200387  
 H,7.0376968202,6.6843744166,0.7898593372  
 H,6.438755649,8.8954013222,-0.2502539512  
 H,5.5181363769,9.3380367858,1.195732132  
 N,3.2464414284,2.5072023536,3.4790584853  
 N,4.5923123419,1.7502494219,5.9171866504  
 N,4.8503172101,4.5590503988,6.6527715599  
 N,3.4239362097,5.3133299563,4.2526482478  
 N,7.7778052174,1.4152656379,4.486130082  
 N,6.6392392809,6.0045012957,3.411999283  
 O,4.6300943594,8.1477010652,6.1449010737  
 Pd,4.0353048561,3.5319918023,5.0708399963

# **Cartesian Coordination of 2ni-TATAB**

-5990.0057217 hartree

C,-0.539636553,2.9741972857,1.3264597985  
 C,0.7845364376,2.5583028873,1.2588280808  
 C,1.8986232815,3.4443583424,1.4237597765  
 C,3.0054842536,2.6594906781,1.520607074  
 C,2.5656967993,1.2982520701,1.383402195  
 C,3.411575992,0.1910410921,1.4110682426  
 C,2.9708930556,-1.087829685,1.1070577801  
 C,3.8539584648,-2.200939305,0.8689234296  
 C,3.0969033548,-3.1974689539,0.3406229944  
 C,1.7395432686,-2.7156342488,0.3058977767

C,0.6545543543,-3.4859522355,-0.1001306689  
 C,-0.6568296079,-3.105807319,0.1518097314  
 C,-1.791652503,-3.9817744226,-0.0061849223  
 C,-2.8564129052,-3.3459665395,0.5426054338  
 C,-2.3973022745,-2.0448202551,0.9634484184  
 C,-3.2258202401,-1.0469424874,1.4545148772  
 C,-2.7952344844,0.2722096144,1.6152219469  
 C,-3.6805281372,1.3803526594,1.8734761677  
 C,-2.9445001365,2.5171731948,1.738580158  
 C,-1.6050567446,2.0972677982,1.4545808798  
 C,4.8565965749,0.3879863947,1.707049213  
 C,5.4177995343,-0.1194334835,2.882911644  
 C,6.7687024423,0.0331738614,3.182674932  
 C,7.5960701905,0.7165924338,2.2953332032  
 C,7.0680504603,1.2346790434,1.1156450389  
 C,5.7160585184,1.0614312641,0.8355145455  
 C,0.9364163638,-4.7900721419,-0.7572763733  
 C,0.7003101336,-6.0154738376,-0.1278299109  
 C,0.9868108894,-7.2297016527,-0.7463399735  
 C,1.5434167317,-7.2372797453,-2.0228403331  
 C,1.8028406344,-6.0333734038,-2.6730028211  
 C,1.4980650346,-4.8346446631,-2.0365482953  
 C,-4.6554466527,-1.3470313275,1.7429511671  
 C,-5.1509836304,-1.245779037,3.0479966161  
 C,-6.4937695156,-1.4551064205,3.3504297747  
 C,-7.3865707841,-1.783011294,2.3329384481  
 C,-6.9254216058,-1.9001344061,1.0250005643  
 C,-5.5783602447,-1.6899231286,0.7516032311  
 C,0.7406410544,3.3077203998,-2.0177264912  
 C,0.9885244301,4.6668656442,-1.7391063338  
 C,2.3227805303,5.1067457712,-1.6969841375  
 C,3.3364521943,4.1801892197,-1.9582946817  
 C,3.1007625584,2.8417174755,-2.2649623844  
 C,1.7705030562,2.3831763642,-2.2988111892  
 C,-0.9324204947,1.3670688418,-2.133572702  
 C,0.1440267993,0.5088855603,-2.4525927895  
 C,-0.1233411965,-0.861433097,-2.6133200331  
 C,-1.4399176562,-1.3002776899,-2.4693001583  
 C,-2.5116249906,-0.4623720263,-2.1612942887  
 C,-2.258344718,0.9081754102,-1.9735525392  
 C,-1.7663365367,3.7456778053,-1.6463808312  
 C,-3.0704747879,3.2201683074,-1.5168458512  
 C,-4.1201349005,4.11985673,-1.2443996902  
 C,-3.8142006497,5.4664490408,-1.0560679518  
 C,-2.5191707038,5.9850490277,-1.127098625  
 C,-1.4664917171,5.1086330597,-1.4397159441  
 C,0.1606145199,6.9655587833,-1.3923921178  
 C,0.4106395138,7.4310353346,0.045336088  
 C,0.6838583149,8.9328712123,0.1290176735  
 C,-4.6068991448,1.3095055721,-1.3578111889  
 C,-5.5128071805,1.2311361502,-2.5881040083  
 C,-6.8987506618,0.6895120883,-2.2302360589  
 C,2.4659719406,0.2054748454,-3.2179644497  
 C,3.2683611856,-0.6151797825,-2.2105834667  
 C,4.2795634627,-1.5380968144,-2.8888775725  
 F,4.6495047179,-0.7804725914,3.757250406  
 F,7.2735758513,-0.4639693647,4.3163443483  
 F,8.892133706,0.8734073223,2.5733895483  
 F,7.8614884629,1.8852135994,0.2574923387  
 F,5.2482040213,1.5663794113,-0.3178402107

F,0.1842024289,-6.0455470741,1.1075318627  
F,0.7461032573,-8.3853604575,-0.1185644953  
F,1.8269785612,-8.395518481,-2.6221354893  
F,2.3368218743,-6.0365002356,-3.8986534329  
F,1.7650243966,-3.6936975636,-2.6951486089  
F,-4.3253435243,-0.9235609812,4.0502511537  
F,-6.9303377207,-1.3477413379,4.6090578288  
F,-8.676533104,-1.9824467788,2.6098134799  
F,-7.7755413724,-2.1961292902,0.0347728008  
F,-5.1901505348,-1.8073528994,-0.5329806978  
H,1.83857115,4.5186919045,1.5036695321  
H,4.0260206589,2.9714326538,1.6765404702  
H,4.9190676552,-2.1942105104,1.0431603423  
H,3.4124648216,-4.179539824,0.0229055237  
H,-1.7607895731,-4.9680504753,-0.4424732778  
H,-3.8660965865,-3.7122507042,0.6403563761  
H,-4.7371767513,1.2939586366,2.075010225  
H,-3.2549537216,3.5476557678,1.806739915  
H,2.5979499076,6.1224684709,-1.4454786363  
H,4.3670183068,4.5196022148,-1.9063736193  
H,3.9434371147,2.1846319268,-2.4252818746  
H,0.6492143485,-1.5885083648,-2.8131534748  
H,-1.6411436721,-2.3609114767,-2.5837957135  
H,-3.4960381897,-0.8957111438,-2.0678246674  
H,-5.1532363615,3.807278643,-1.1808656514  
H,-4.6279713068,6.1508009134,-0.8331587734  
H,-2.3681471269,7.035640411,-0.918902264  
H,1.0211982636,7.1972953704,-2.0231080435  
H,-0.6800498563,7.5089000737,-1.828091358  
H,1.2627074659,6.871996222,0.4521275311

H,-0.4602347168,7.1723876626,0.6598531901  
H,1.5650320682,9.208324043,-0.4608073435  
H,0.8611700991,9.2477556441,1.1610117169  
H,-0.1646707545,9.5098344176,-0.2547520067  
H,-5.0612032258,1.9292739357,-0.5832434623  
H,-4.4938481654,0.3251290138,-0.912413184  
H,-5.0359350029,0.5910780284,-3.338891019  
H,-5.5960517017,2.2272211446,-3.0376780116  
H,-6.8355283194,-0.3143679978,-1.7992543828  
H,-7.5440186258,0.6337551224,-3.1115537744  
H,-7.3967011306,1.3344814101,-1.4965825787  
H,1.9719290842,-0.4551314125,-3.935423888  
H,3.1266626121,0.8488641255,-3.8047609243  
H,3.7751735874,0.0618479686,-1.519291381  
H,2.573520265,-1.2041089581,-1.6115854804  
H,3.7783415372,-2.2724348997,-3.5278092133  
H,4.8563562994,-2.0912267107,-2.142406829  
H,4.9858932638,-0.9761276027,-3.5107384814  
N,1.1977082201,1.2428954069,1.2104188917  
N,1.6674178464,-1.4288080184,0.7912545443  
N,-1.0432248211,-1.9105587701,0.7218081564  
N,-1.5132640247,0.7207822941,1.3857698722  
N,-0.1125414977,5.530115485,-1.4922417546  
N,1.4343644558,1.0541253238,-2.6113936257  
N,-3.2698482285,1.8335913762,-1.6357176292  
Ni,0.0734502402,-0.3402222184,1.0084719274  
B,-0.6570563673,2.8110930402,-1.9578826814  
O,-0.833407793,4.3041956277,1.4012186939  
H,-0.3062398548,4.7842262407,0.7448945473

## 5. Solution-state behaviors of ion pairs

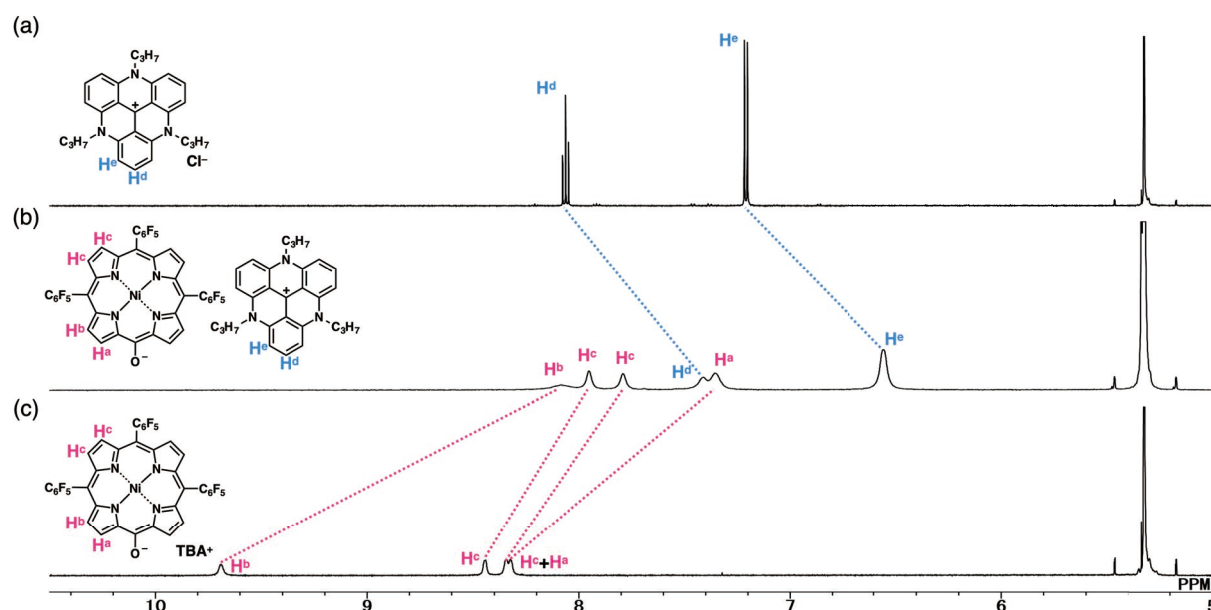

**Fig. S87**  $^1\text{H}$  NMR spectra of (a)  $\text{TATA}^+\text{-Cl}^-$ ,<sup>[S4]</sup> (b)  $2\text{ni}^-$ - $\text{TATA}^+$ , and (c)  $2\text{ni}^-$ - $\text{TBA}^+$ <sup>[S5b]</sup> in  $\text{CD}_2\text{Cl}_2$  at  $20\text{ }^\circ\text{C}$  ( $1.0 \times 10^{-3}$  M). According to the optimized structure of  $2\text{ni}^-$ - $\text{TATA}^+$  (Fig. S44b),  $\pi$ -electronic ion pair exists as a stacking structure in solution state. Considering of the aromatic property of  $2\text{ni}^-$  and  $\text{TATA}^+$  in NICS calculations and ACID plots (Fig. S67–69), the upfield shifts of  $2\text{ni}^-$  suggested the shielding effect of stacked  $\pi$ -systems and those of  $\text{TATA}^+$  signals indicated the shielding effect of stacked  $\pi$ -systems and that from electron-rich anionic  $2\text{ni}^-$ .

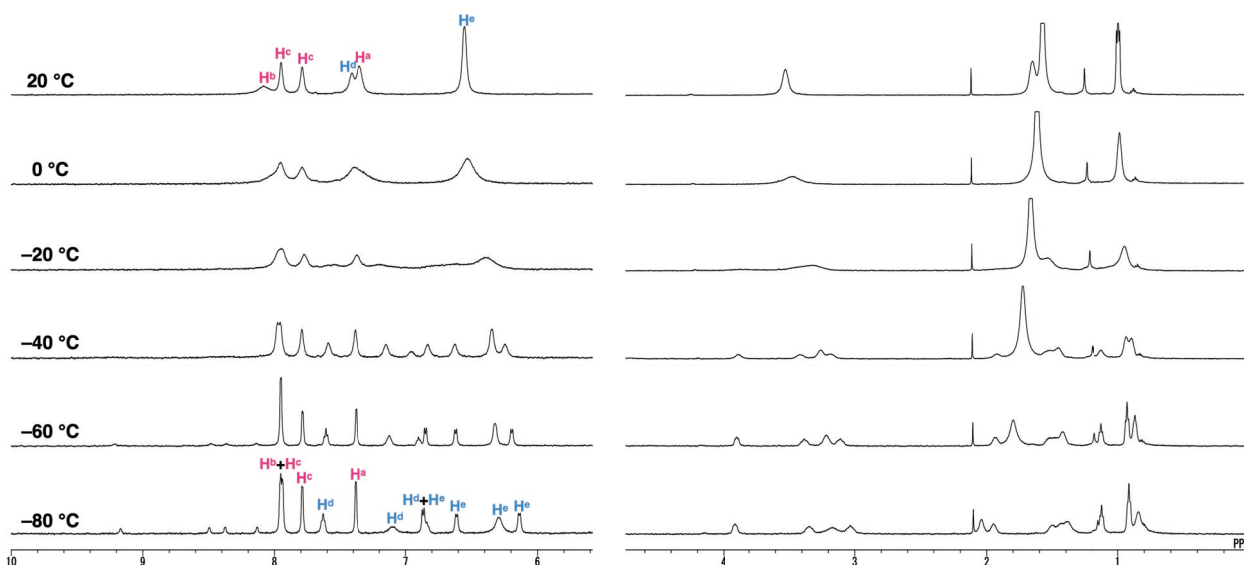

**Fig. S88** VT  $^1\text{H}$  NMR spectra of  $2\text{ni}^-$ - $\text{TATA}^+$  from  $20$  to  $-80\text{ }^\circ\text{C}$  in  $\text{CD}_2\text{Cl}_2$  ( $1.0 \times 10^{-3}$  M). When temperature decreased to  $-80\text{ }^\circ\text{C}$ , one signal of  $2\text{ni}^-$  shifted upfield from  $8.08$  to  $7.94$  ppm ( $\text{H}^b$ ), two signals of  $2\text{ni}^-$  were almost no difference of chemical shift ( $\text{H}^c$ ), and one signal of  $2\text{ni}^-$  shifted downfield from  $7.35$  to  $7.38$  ppm ( $\text{H}^a$ ), suggesting the tightly bound ion pair at low temperature, although a small amount of  $2\text{ni}^-$  was observed probably due to the basic property of the anionic oxygen site of  $2\text{ni}^-$ . The upfield shift of  $\text{H}^b$  indicated that  $\text{H}^b$  was located inside the current ring of  $\text{TATA}^+$ , whereas downfield shifts of  $\text{H}^a$  upon cooling suggested the location outside the current ring of  $\text{TATA}^+$ . Furthermore, signals of  $\text{TATA}^+$  appeared at  $7.63$  (1H),  $7.10$  (1H),  $6.87$  (1H),  $6.84$  (1H),  $6.61$  (1H),  $6.29$  (2H), and  $6.14$  (1H) ppm at  $-80\text{ }^\circ\text{C}$  (the signal of 1H would be overlapped with other signals). Split signals of  $\text{TATA}^+$  suggested the slow rotation of  $\text{TATA}^+$  at  $-80\text{ }^\circ\text{C}$  due to tight ion-pairing.  $^1\text{H}$ - $^1\text{H}$  COSY of  $2\text{ni}^-$ - $\text{TATA}^+$  in  $\text{CD}_2\text{Cl}_2$  at  $-80\text{ }^\circ\text{C}$  ( $1.0 \times 10^{-3}$  M) showed the correlation between signals (ppm) at  $8.08$ – $7.79$ ,  $7.94$ – $7.38$ ,  $7.63$ – $6.87/6.62$ , and  $6.84$ – $6.14$ , suggesting that the corresponding protons were located at the vicinal positions (Fig. S89a). In contrast to  $2\text{pd}^-$ - $\text{TATA}^+$  (Fig. S92b), the NOE correlation between  $7.94$  ppm of  $2\text{ni}^-$  and  $2.04$  ppm of  $\text{TATA}^+$  was observed (Fig. S89b), suggesting the more tightly bound stacking ion pair.

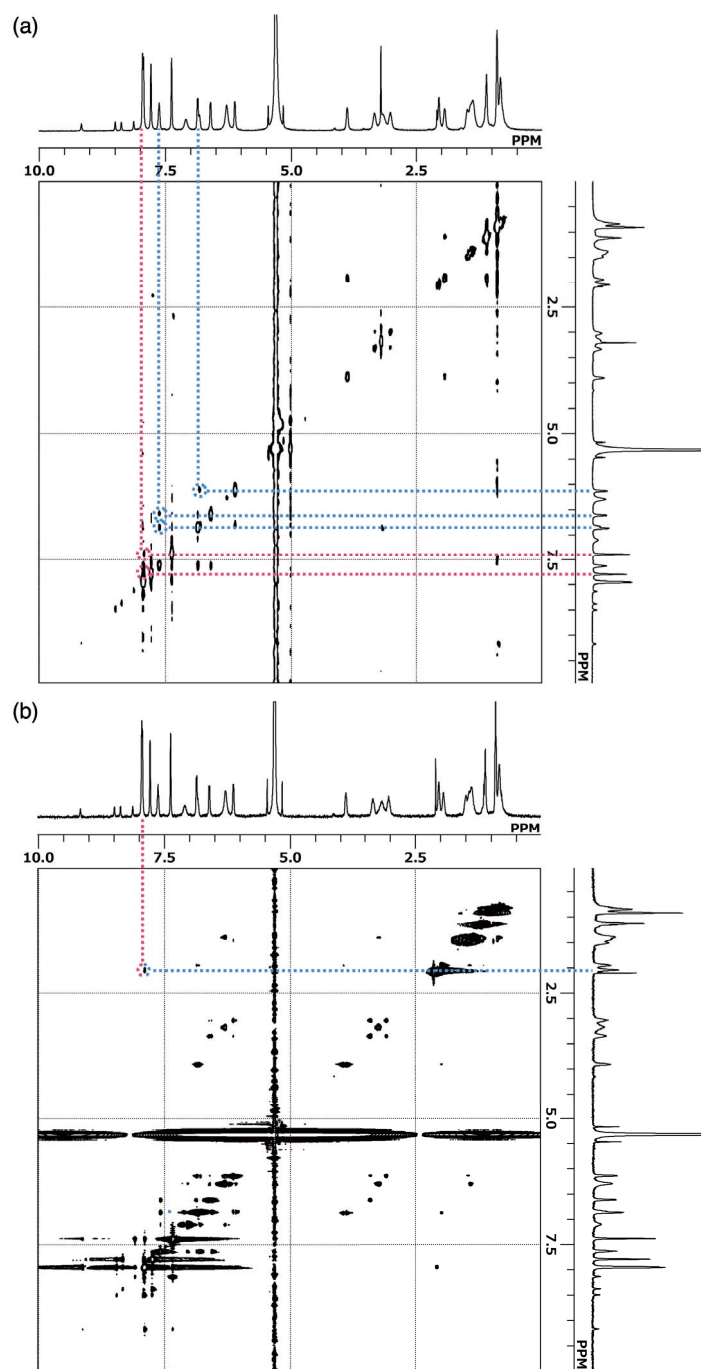

**Fig. S89** (a)  $^1\text{H}$ - $^1\text{H}$  COSY and (b)  $^1\text{H}$ - $^1\text{H}$  NOESY spectra of  $2\text{ni-TATA}^+$  at  $-80^\circ\text{C}$  in  $\text{CD}_2\text{Cl}_2$  ( $1.0 \times 10^{-3}\text{ M}$ ).

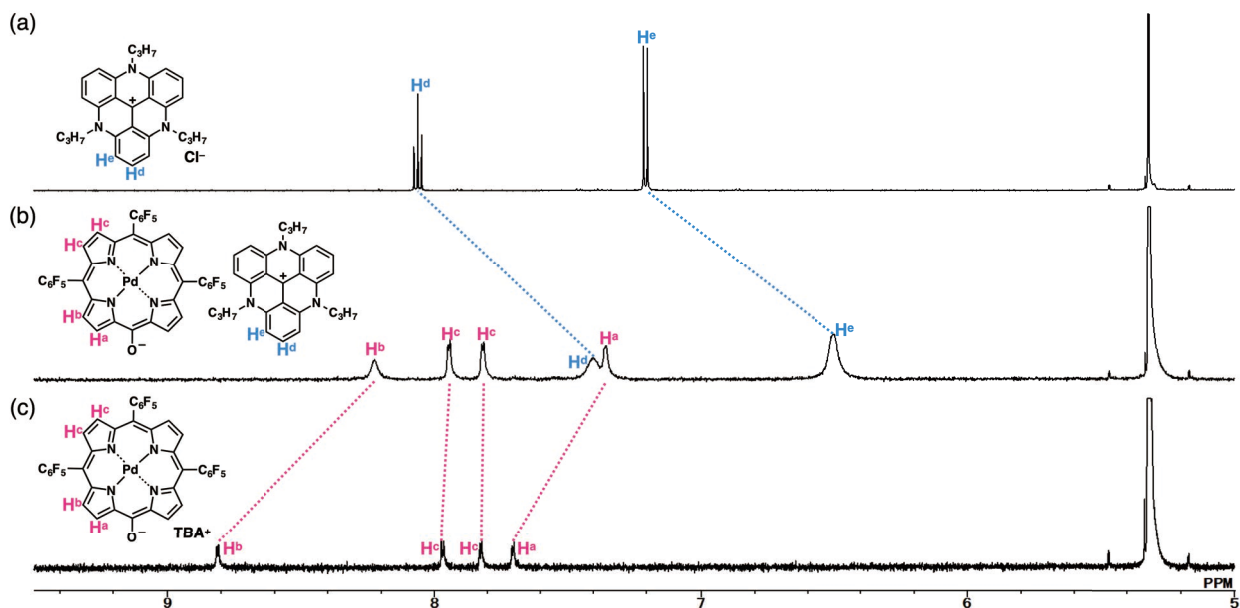

**Fig. S90**  $^1\text{H}$  NMR spectra of (a)  $\text{TATA}^+\text{-Cl}^-$ ,<sup>[S4]</sup> (b)  $2\text{pd}^-\text{-TATA}^+$ , and (c)  $2\text{pd}^-\text{-TBA}^+$  in  $\text{CD}_2\text{Cl}_2$  at  $20^\circ\text{C}$  ( $1.0 \times 10^{-3}$  M). According to the optimized structure of  $2\text{pd}^-\text{-TATA}^+$  (Fig. S44d),  $\pi$ -electronic ion pair exists as a stacking structure in solution state. As suggested by the aromatic properties of  $2\text{pd}^-$  and  $\text{TATA}^+$  in NICS calculations and ACID plots (Fig. S67–69), the upfield shifts of  $2\text{pd}^-$  suggested the shielding effect of stacked  $\pi$ -systems and those of  $\text{TATA}^+$  signals indicated the shielding effect of stacked  $\pi$ -systems and that from electron-rich anionic  $2\text{pd}^-$ .

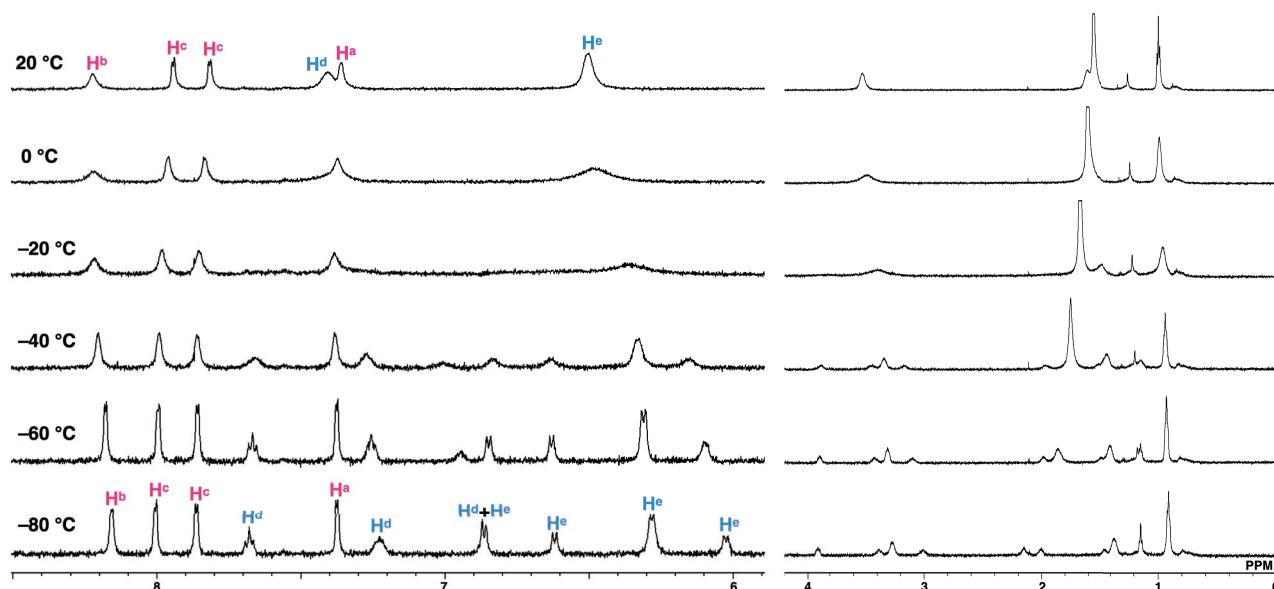

**Fig. S91** VT  $^1\text{H}$  NMR spectra of  $2\text{pd}^-$ - $\text{TATA}^+$  from 20 to  $-80\text{ }^\circ\text{C}$  in  $\text{CD}_2\text{Cl}_2$  ( $1.0 \times 10^{-3}\text{ M}$ ). When temperature decreased to  $-80\text{ }^\circ\text{C}$ , one signal of  $2\text{pd}^-$  shifted upfield from 8.22 to 8.16 ppm ( $\text{H}^b$ ) and three signals of  $2\text{pd}^-$  shifted downfield from 7.97 and 7.82 ppm to 8.00 and 7.86 ppm (two signals of  $\text{H}^c$ ), respectively, and from 7.36 to 7.37 ppm ( $\text{H}^a$ ), suggesting the tightly bound ion pair at low temperature. According to the optimized structure of  $2\text{pd}^-$ - $\text{TATA}^+$  (Fig. S44d),  $\pi$ -electronic ion pair exists as a stacking structure in solution state. The upfield shift of  $\text{H}^b$  indicated that  $\text{H}^b$  is located inside the current ring of  $\text{TATA}^+$ , whereas downfield shifts of  $\text{H}^c$  upon cooling suggested the outside location of the current ring of  $\text{TATA}^+$ . Slight downfield shift of  $\text{H}^a$  is probably derived from the contributions of the shielding effect from current ring and the deshielding effect from electron-poor cationic state of  $\text{TATA}^+$ . Furthermore, signals of  $\text{TATA}^+$  appeared at 7.68 (1H), 7.23 (1H), 6.86 (2H), 6.62 (1H), 6.28 (3H), and 6.02 (1H) ppm at  $-80\text{ }^\circ\text{C}$ . Split signals of  $\text{TATA}^+$  suggested the slow rotation of  $\text{TATA}^+$  at  $-80\text{ }^\circ\text{C}$  due to tight ion-pairing.  $^1\text{H}$ - $^1\text{H}$  COSY of  $2\text{pd}^-$ - $\text{TATA}^+$  in  $\text{CD}_2\text{Cl}_2$  at  $-80\text{ }^\circ\text{C}$  ( $1.0 \times 10^{-3}\text{ M}$ ) showed the correlation between signals (ppm) at 8.16–7.36, 8.00–7.86, 7.68–6.86/6.62, 7.23–6.28, and 6.86–6.02, suggesting that the corresponding protons were located at the vicinal positions (Fig. S92a).



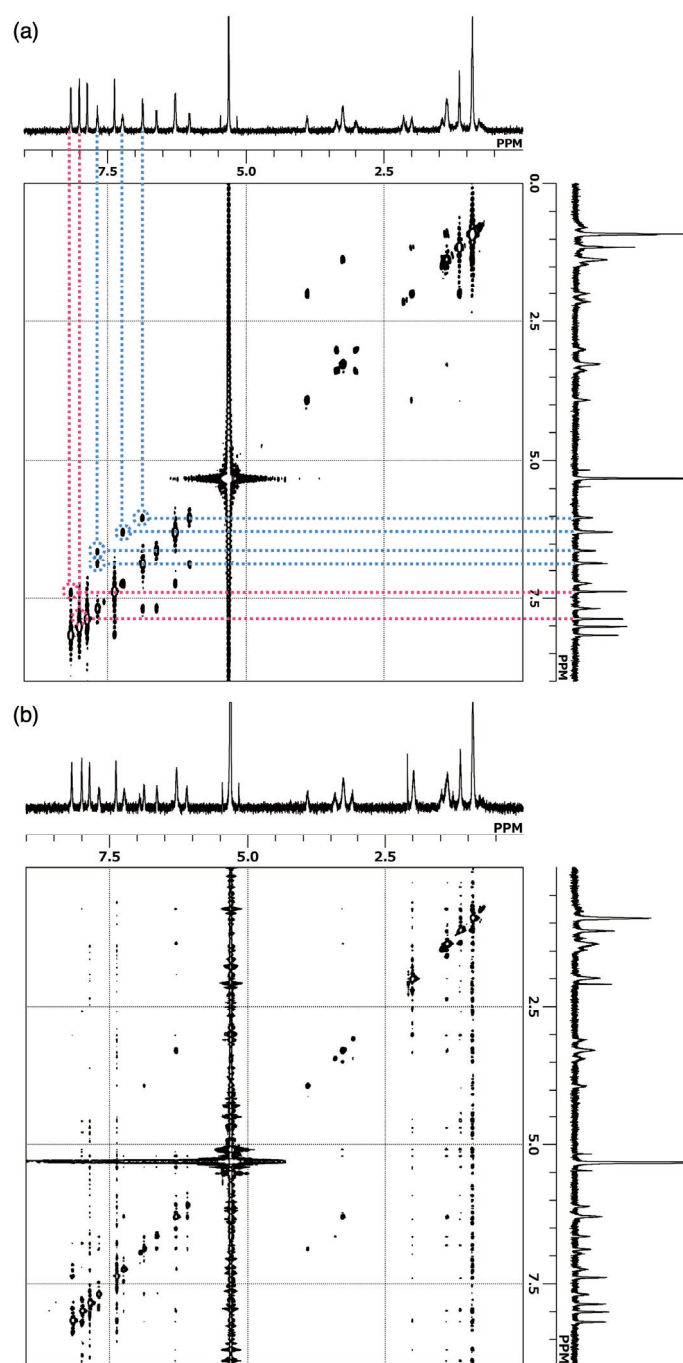

**Fig. S92** (a) <sup>1</sup>H-<sup>1</sup>H COSY and (b) <sup>1</sup>H-<sup>1</sup>H NOESY spectra of **2pd**<sup>-</sup>-TATA<sup>+</sup> at -80 °C in CD<sub>2</sub>Cl<sub>2</sub> (1.0 × 10<sup>-3</sup> M).

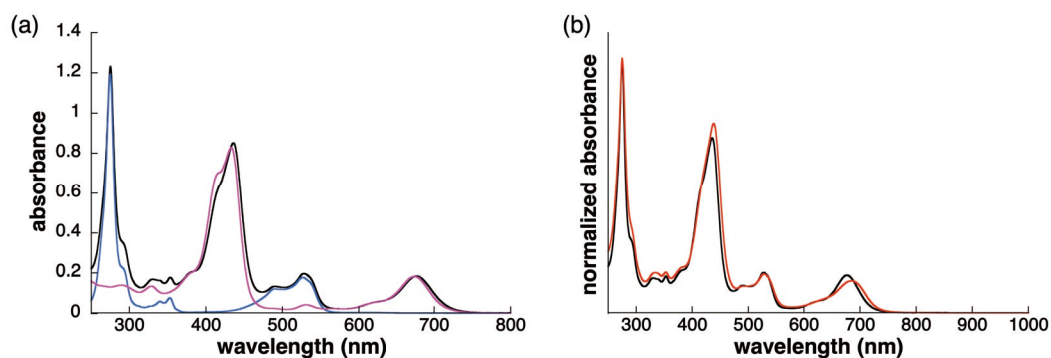

**Fig. S93** UV/vis absorption spectra of (a)  $2\text{ni}^-$ -TATA $^+$  (black), TATA $^+$ -Cl $^-$  (cyan), and  $2\text{ni}^-$ -TBA $^+$  (magenta) with the concentrations of  $1 \times 10^{-5}$  M and (b)  $2\text{ni}^-$ -TATA $^+$  with concentrations of  $1 \times 10^{-5}$  M (black) and  $1 \times 10^{-3}$  M (red) in CH $_2$ Cl $_2$  at 25 °C. Independent absorption bands for each  $\pi$ -electronic ion suggest very weak exciton coupling between  $\pi$ -electronic anions and cations. The charge-transfer transition estimated by DFT calculation (Fig. S62) was not observed.

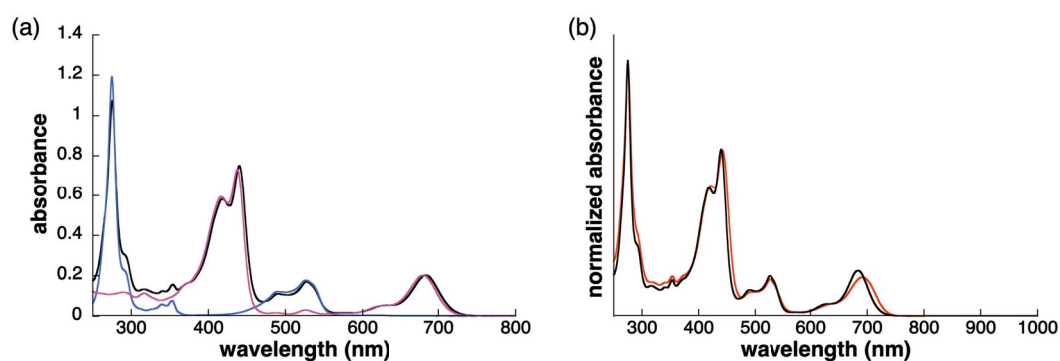

**Fig. S94** UV/vis absorption spectra of (a)  $2\text{pd}^-$ -TATA $^+$  (black), TATA $^+$ -Cl $^-$  (cyan), and  $2\text{pd}^-$ -TBA $^+$  (magenta) with the concentrations of  $1 \times 10^{-5}$  M and (b)  $2\text{pd}^-$ -TATA $^+$  with concentrations of  $1 \times 10^{-5}$  M (black) and  $1 \times 10^{-3}$  M (red) in CH $_2$ Cl $_2$  at 25 °C. Independent absorption bands for each  $\pi$ -electronic ion suggest very weak exciton coupling between  $\pi$ -electronic anions and cations. The charge-transfer transition estimated by DFT calculation (Fig. S63) was not observed.

## 6. Solid-state properties of ion pairs

**Method for steady-state absorption measurements of single crystals.** An inverted optical microscope (IX71, Olympus) was used for steady-state absorption measurements of single crystals. The halogen lamp placed above the sample stage was employed as the incident light, and focused on the sample microcrystal with the objective lens ( $\times 40$ , NA 0.40). The transmitted light was collected with the objective lens ( $\times 60$ , NA 0.70), and then passed through a confocal pinhole (1  $\mu\text{m}$  in diameter) to select the monitoring position which was the same in the femtosecond pump-probe measurement. The intensity was detected with another CCD camera (DU970P, Andor) coupled with another polychromator (250is, Chromex). The absorption spectra were calculated by using reference light which was transmitted through only coverslip.

**Method for femtosecond transient absorption measurements of single crystals.** Transient absorption measurements on the sub-picosecond to nanosecond time scale were conducted by homemade pump-probe systems. For the solution sample, an amplified femtosecond laser, Spirit One 1040-8 (Spectra-Physics, 1040 nm, the pulse width:  $\sim 270$  fs), was split into two beams with a ratio of 1:9. The stronger beam was directed to a noncollinear optical parametric amplifier (NOPA), Spirit-NOPA-3H (Spectra-Physics) to generate the 680-nm femtosecond laser pulse for the pump beam. The pump beam was chopped prior to the sample at 500 Hz for signal differencing. The other weaker beam was focused to a deuterated water placed in a 10-mm quartz cuvette to generate the white light continuum for the probe beam. Both pump and probe beams were focused to the sample solution placed in the 2-mm quartz cuvette. The polarization between the pump and probe pulses was set at magic angle. The transmitted probe beam was detected with multichannel detection system, PK120-C-RK (Unisoku), composed of a CMOS linear image sensor and a polychromator. The obtained spectra were calibrated for group velocity dispersion using the data obtained by the optical Kerr signal of  $\text{CHCl}_3$  between the pump pulse and the white-light continuum. The instrumental response function was  $\sim 80$  fs. The sample solution was stirred with a stirrer during the experiments and the measurements were performed under nitrogen atmosphere at r.t.

Femtosecond transient absorption measurements of crystals were carried out using 100-fs pulses (800 nm) from a Ti:Sapphire chirped pulse amplified system (Tsunami and Spitfire-ACE, Spectra-Physics) operating at 1 kHz repetition rate under the microscope.<sup>[S20,21]</sup> The output beam of the amplified system was divided into two using a beam splitter (80% – 20%). The stronger beam was guided into optical parametric oscillator and amplifier (OPA-800, Spectra-Physics), where the excitation wavelength was tuned to 650 nm and the pulse duration was ca. 150 fs in fwhm. These excitation pulses were chopped at a 500 Hz repetition rate with an optical chopper (S2000, Thorlabs) and were circularly polarized by Berek compensator (Newport). After passing through the concave and convex lenses to change the beam diameter at sample position, the excitation pulses were guided into an inverted optical microscope (IX71, Olympus), and focused at the sample with an objective lens ( $\times 60$ , NA 0.70). The excitation intensity was set to be ca.  $0.1 \text{ mJ/cm}^2$  with a neutral density filter to avoid the photodecomposition. A small portion of the weaker fundamental beam was focused into a  $\text{CaF}_2$  window (3-mm thickness) to generate the white-light continuum in the wavelength range of 380 to 860 nm, which was used as probe light. The probe pulses were guided into the microscope co-linearly with the pump pulses, and focused into the sample with the same  $\times 60$  objective lens. The transmitted light of the probe was collected with an objective lens ( $\times 40$ , NA 0.40), and then the intensity was detected with a CCD camera (BU-54DUV, Bitran) coupled with a polychromator (250is, Chromex). The time delay between pump and probe pulses was carefully varied from  $-10$  ps to 600 ps by a computer controlled translation stage (STM-150, SIGMA Koki). The temporal cross correlation of the pump and probe pulses at the sample position was 350 fs in fwhm. The chirping of the monitoring white light continuum was corrected for transient absorption spectra. The diameter of the pump beams was about 1.2 mm in fwhm at the focusing point, which was larger than that of the probe. The smooth and flat area of single microcrystal was selected.

**Electrochemical analysis.** Cyclic voltammograms (CVs) were measured under Ar atmosphere in  $\text{CH}_3\text{CN}$  solutions containing the sample and  $\text{TBA}^+\text{-PF}_6^-$  (0.1 M) as a supporting electrolyte using an ALS/CH Instruments 720 electrochemical analyzer with a glassy-carbon disk working electrode (3-mm diameter), an  $\text{Ag/AgNO}_3$  (0.010 M) reference electrode, and a Pt counter electrode. Spectroelectrochemical analyses were conducted using an ALS/CH Instruments 720 electrochemical analyzer and a JASCO V-670 spectrometer with a thin layer quartz glass cell (path length: 1.0 mm), a Pt mesh working electrode, an  $\text{Ag/AgNO}_3$  (0.010 M) reference electrode, and a Pt counter electrode. The supporting electrolyte was dried in vacuo at  $100^\circ\text{C}$  for 1 day prior to use.

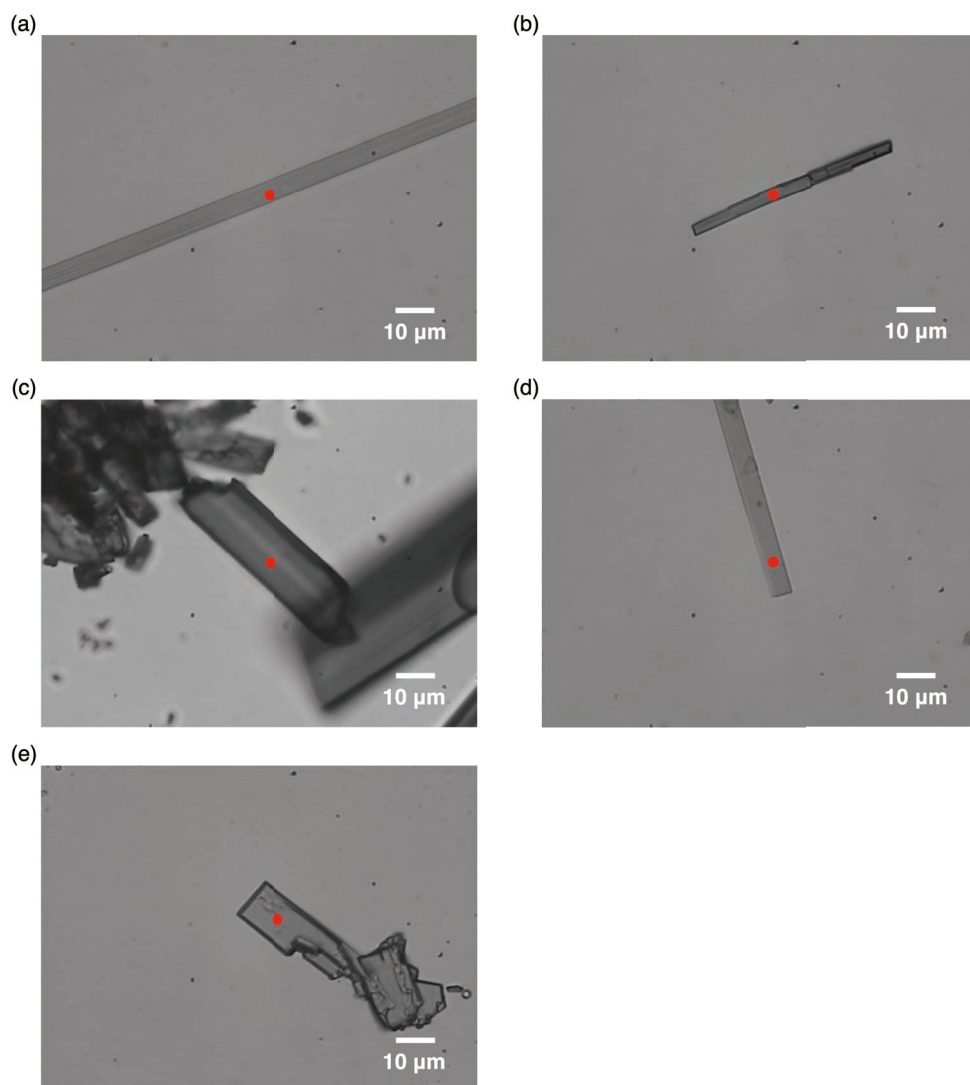

**Fig. S95** Optical microscopic images of single crystals of (a)  $2\text{ni}^- \text{-TBA}^+$ , (b)  $2\text{ni}^- \text{-TATA}^+$ , (c)  $2\text{pd}^- \text{-TBA}^+$ , (d)  $2\text{pd}^- \text{-TATA}^+$ , and (e)  $\text{TATA}^+ \text{-Cl}^-$ . Red spots indicate the position where the UV/vis absorption measurements were conducted (Fig. S96).

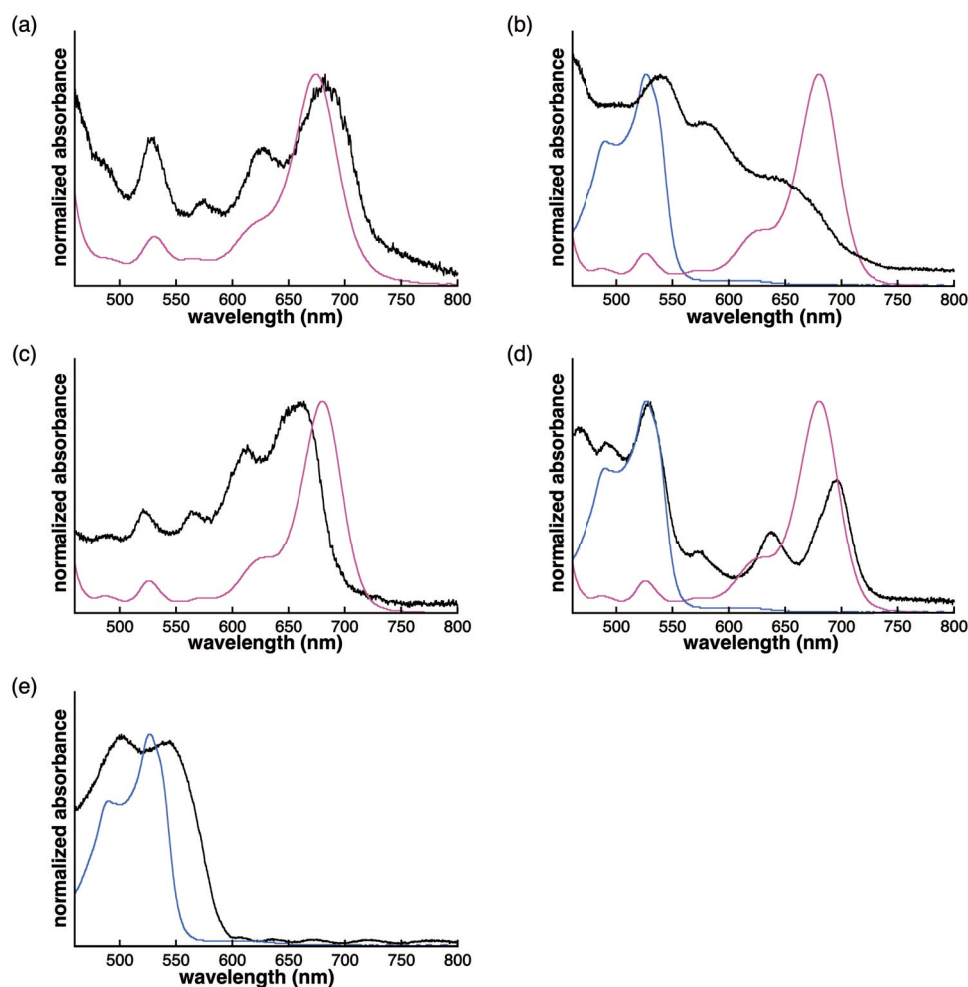

**Fig. S96** UV/vis absorption spectra of (a) **2ni**<sup>−</sup>-TBA<sup>+</sup> in the form of a single crystal (black) and in CH<sub>2</sub>Cl<sub>2</sub> ( $1 \times 10^{-5}$  M) (magenta) (Fig. S93a), (b) **2ni**<sup>−</sup>-TATA<sup>+</sup> in the form of a single crystal (black) and **2ni**<sup>−</sup>-TBA<sup>+</sup> (magenta) and TATA<sup>+</sup>-Cl<sup>−</sup> (cyan) in CH<sub>2</sub>Cl<sub>2</sub> ( $1 \times 10^{-5}$  M) (Fig. S93a), (c) **2pd**<sup>−</sup>-TBA<sup>+</sup> in the form of a single crystal (black) and in CH<sub>2</sub>Cl<sub>2</sub> ( $1 \times 10^{-5}$  M) (magenta) (Fig. S94a), (d) **2pd**<sup>−</sup>-TATA<sup>+</sup> in the form of single crystals (black) and **2pd**<sup>−</sup>-TBA<sup>+</sup> (magenta) and TATA<sup>+</sup>-Cl<sup>−</sup> (cyan) in CH<sub>2</sub>Cl<sub>2</sub> ( $1 \times 10^{-5}$  M) (Fig. S94a), and (e) TATA<sup>+</sup>-Cl<sup>−</sup> in the form of a single crystal (black) and in CH<sub>2</sub>Cl<sub>2</sub> ( $1 \times 10^{-5}$  M) (cyan) (Fig. S93a,94a). It should be emphasized that the UV/vis absorption spectrum of the single crystal of **2ni**<sup>−</sup>-TATA<sup>+</sup>, with the contribution of charge-segregated assembly (Fig. S28,29), showed significantly broad bands with the  $\lambda_{\text{max}}$  at 539 and 580 nm with a shoulder at 650 nm. The shoulder at 650 nm was blue-shifted ( $\sim 600 \text{ cm}^{-1}$ ) from the band at 677 nm of the monomeric **2ni**<sup>−</sup>, whereas the bands at 539 and 580 nm were red-shifted ( $\sim 1900$  and  $\sim 1700 \text{ cm}^{-1}$ ) from those at 490 and 527 nm of monomeric TATA<sup>+</sup>. Therefore, the broad absorption bands of the solid-state **2ni**<sup>−</sup>-TATA<sup>+</sup>, with the shifts from monomeric states, can originate from the exciton coupling of proximally located identically charged  $\pi$ -electronic systems. The **2ni**<sup>−</sup> units, with the side-by-side-arrangement in the solid-state **2ni**<sup>−</sup>-TATA<sup>+</sup>, showed the parallel-arranged transition dipole moments (Fig. S83), inducing the blue-shifted absorption band. On the other hand, TATA<sup>+</sup> formed slipped-stacking dimeric structures with head-to-tail-arranged transition dipole moments of TATA<sup>+</sup> (Fig. S83), resulting in the red-shifted absorption bands. Focusing on other ion pairs, the crystal-state absorption band of **2ni**<sup>−</sup>-TBA<sup>+</sup>, in the form of charge-by-charge assembly,<sup>[S5b]</sup> was identical to that of monomeric **2ni**<sup>−</sup> due to the arrangement of **2ni**<sup>−</sup> (Fig. S82). In **2pd**<sup>−</sup>-TBA<sup>+</sup>, the band at 662 nm was blue-shifted ( $\sim 400 \text{ cm}^{-1}$ ) from the band at 680 nm of the monomeric **2pd**<sup>−</sup> because of the parallel arrangement of **2pd**<sup>−</sup> in the charge-by-charge assembly (Fig. S84). The crystal-state absorption spectra of **2pd**<sup>−</sup>-TATA<sup>+</sup> showed red-shifted absorption bands for **2pd**<sup>−</sup> and almost no shift for TATA<sup>+</sup> because of their arrangements (Fig. S85). Furthermore, the crystal-state absorption spectrum of TATA<sup>+</sup>-Cl<sup>−</sup>, with the contribution of charge-segregated assembly,<sup>[S4]</sup> indicated that the bands at 501 and 544 nm were red-shifted ( $\sim 400$  and  $\sim 600 \text{ cm}^{-1}$ ) from those at 490 and 527 nm of monomeric TATA<sup>+</sup>. TATA<sup>+</sup> formed slipped-stacking dimeric structures with head-to-tail-arranged transition dipole moments of TATA<sup>+</sup> (Fig. S86), resulting in the red-shifted absorption bands.

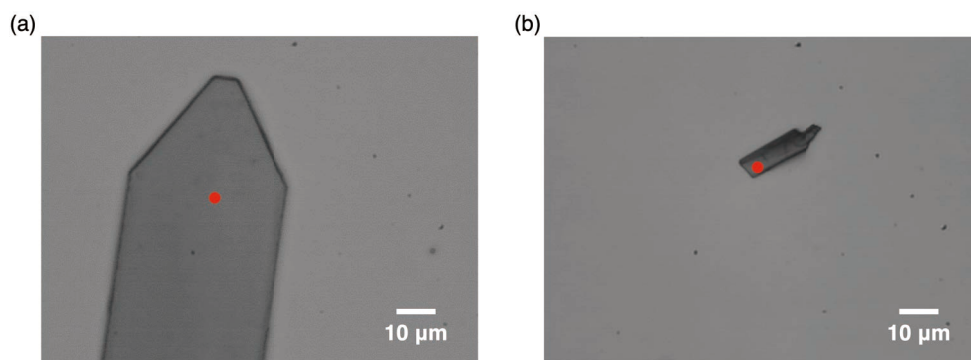

**Fig. S97** Optical microscopic images of single crystals of (a) **2ni**<sup>-</sup>-TBA<sup>+</sup> and (b) **2ni**<sup>-</sup>-TATA<sup>+</sup>. Red spots indicate the position where the transient absorption measurements were conducted (Fig. S98,99).

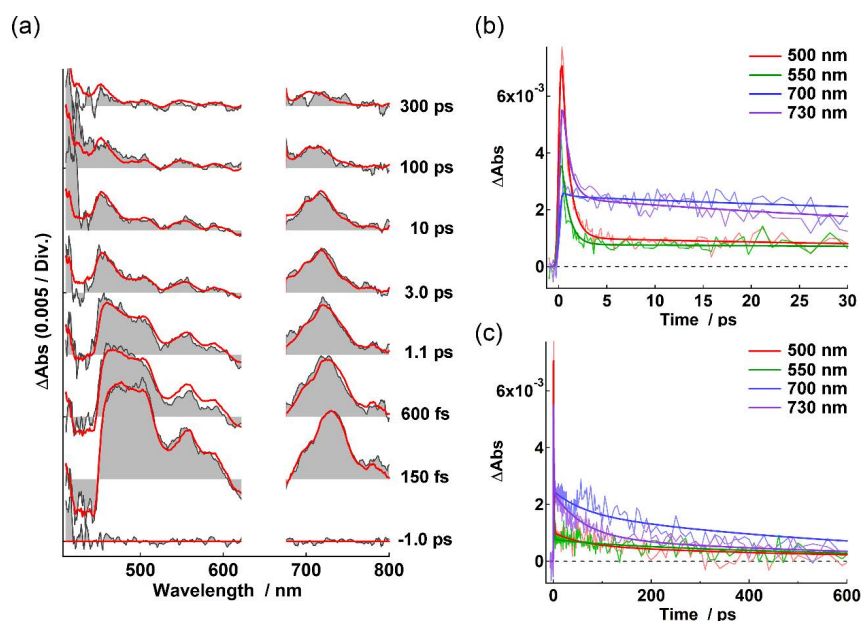

**Fig. S98** (a) Transient absorption spectra of a single crystal of **2ni**<sup>-</sup>-TBA<sup>+</sup> excited at 650 nm (<100 μJ/cm<sup>2</sup>), wherein the red lines indicate the fitting lines by global analyses, and (b,c) transient absorption dynamics of a single crystal of **2ni**<sup>-</sup>-TBA<sup>+</sup> at different probe wavelengths, wherein thin and thick lines indicate the experimental data and fitting data by the global analyses, respectively.



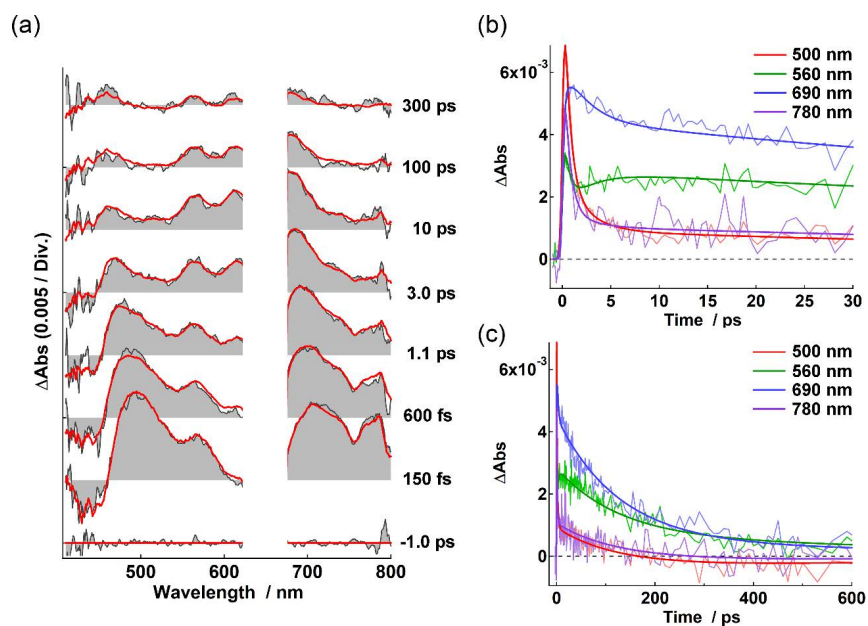

**Fig. S99** (a) Transient absorption spectra of a single crystal of **2ni**-TATA<sup>+</sup> excited at 650 nm (<100  $\mu\text{J}/\text{cm}^2$ ), wherein the red lines indicate the fitting lines by global analyses, and (b,c) transient absorption dynamics of **2ni**-TATA<sup>+</sup> at different probe wavelengths, wherein thin and thick lines indicate the experimental data and fitting data by the global analyses, respectively.

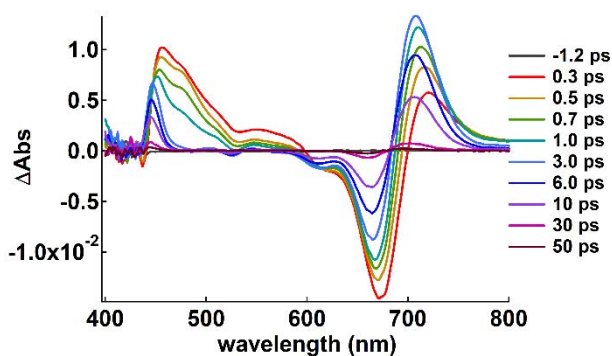

**Fig. S100** Transient absorption spectra of **2ni**-TBA<sup>+</sup> in  $\text{CH}_2\text{Cl}_2$  ( $1.8 \times 10^{-4}$  M) excited at 680 nm ( $\sim 500$   $\mu\text{J}/\text{cm}^2$ ) with delay time spanning from -1.2 ps to 50 ps.

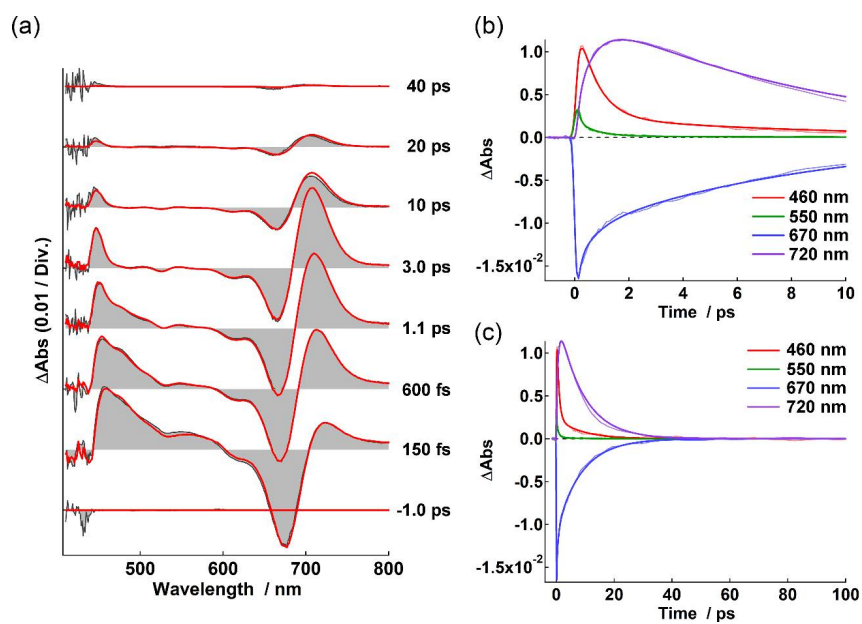

**Fig. S101** (a) Transient absorption spectra of **2ni**<sup>-</sup>TBA<sup>+</sup> in CH<sub>2</sub>Cl<sub>2</sub> ( $1.8 \times 10^{-4}$  M) excited at 680 nm ( $\sim 500$   $\mu\text{J}/\text{cm}^2$ ), wherein the red lines indicate the fitting lines by global analyses, and (b,c) transient absorption dynamics of **2ni**<sup>-</sup>TBA<sup>+</sup> in CH<sub>2</sub>Cl<sub>2</sub> at different probe wavelengths, wherein thin and thick lines indicate the experimental data and fitting data by the global analyses, respectively.

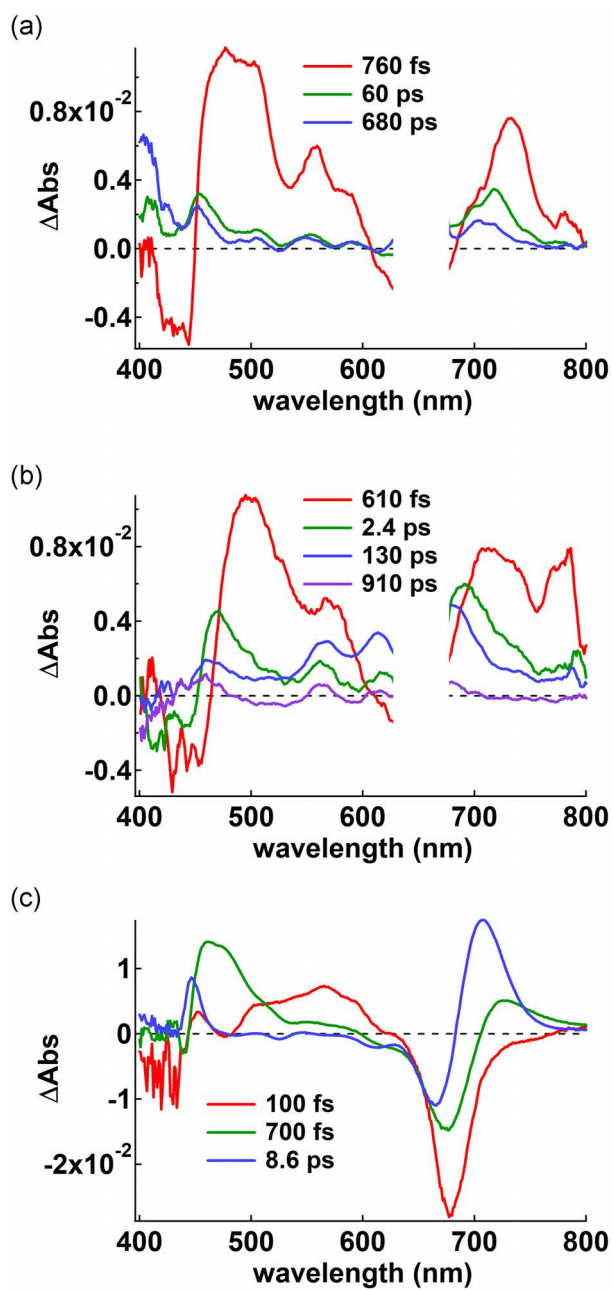

**Fig. S102** Evolution-associated difference absorption spectra (EADS) of (a) **2ni**<sup>-</sup>-TBA<sup>+</sup> and (b) **2ni**<sup>-</sup>-TATA<sup>+</sup> as single crystals excited at 650 nm and (c) **2ni**<sup>-</sup>-TBA<sup>+</sup> in  $\text{CH}_2\text{Cl}_2$  excited at 680 nm.

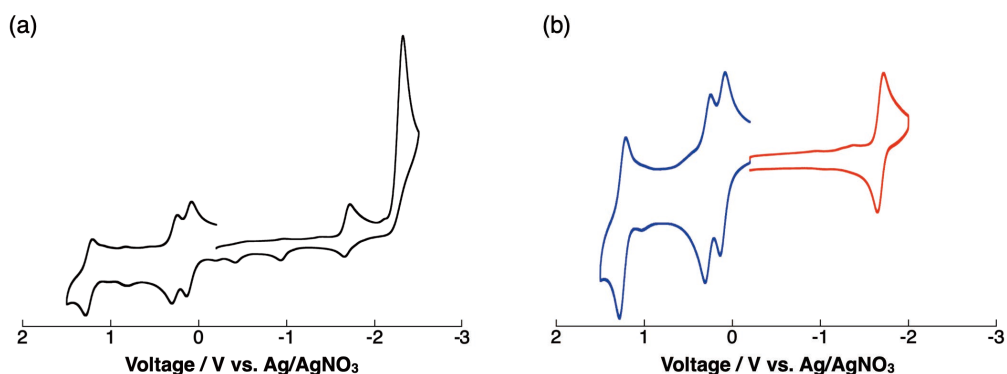

**Fig. S103** CVs of  $2\text{ni}^-$ - $\text{TBA}^+$  in  $\text{CH}_3\text{CN}$  ( $5.8 \times 10^{-4}$  M) containing  $\text{TBA}^+$ - $\text{PF}_6^-$  (0.1 M) as electrolyte under Ar atmosphere: (a) CV at a scan rate of 100 mV/s and (b) anodic scans from  $-0.2$  to  $1.5$  V at a scan rate of 100 mV/s (blue) and cathodic scans from  $-0.2$  to  $-2.0$  V at a scan rate of 100 mV/s (red). The reversible waves in the anodic and cathodic scans confirmed that the first reduction at  $-1.68$  V as well as oxidation at  $+0.11$ ,  $+0.28$ , and  $+1.25$  V are reversible processes.

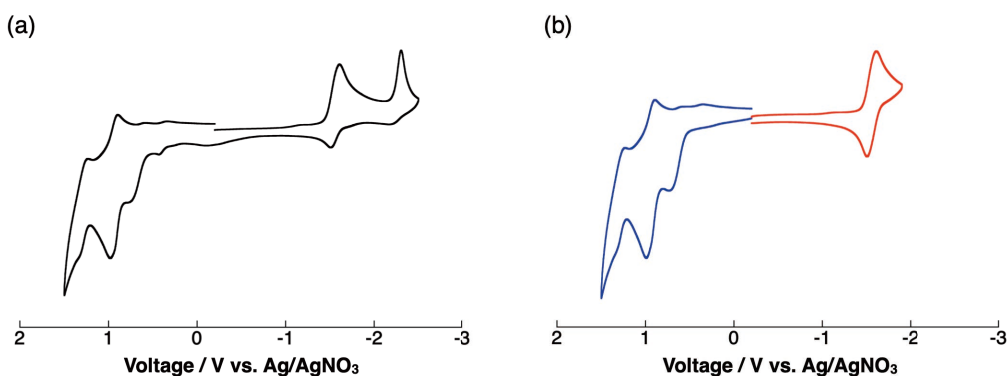

**Fig. S104** CVs of  $\text{TATA}^+$ - $\text{Cl}^-$  in  $\text{CH}_3\text{CN}$  ( $1.0 \times 10^{-3}$  M) containing  $\text{TBA}^+$ - $\text{PF}_6^-$  (0.1 M) as electrolyte under Ar atmosphere: (a) CV at a scan rate of 100 mV/s and (b) anodic scans from  $-0.2$  to  $1.5$  V at a scan rate of 100 mV/s (blue) and cathodic scans from  $-0.2$  to  $-1.9$  V at a scan rate of 100 mV/s (red). The reversible wave in the cathodic scan confirmed that the first reduction at  $-1.56$  V is a reversible process.

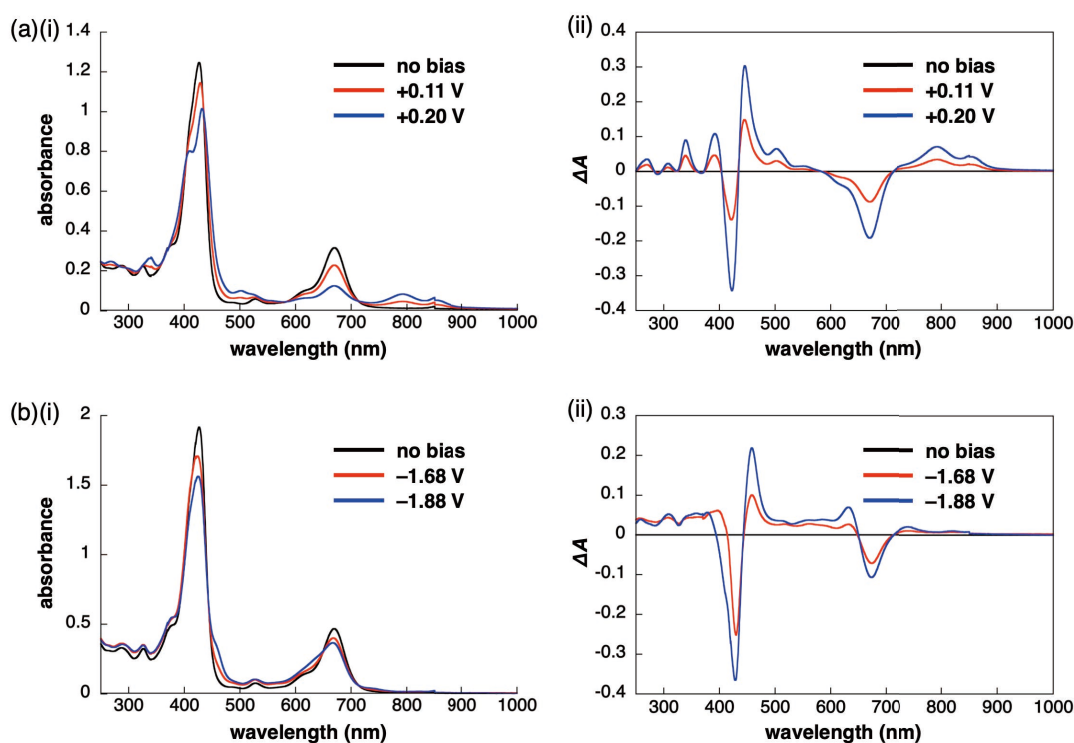

**Fig. S105** Spectroelectrochemical analysis of  $2\text{ni}^-$ -TBA $^+$  in (a) the oxidation states at +0.11 V (red) and +0.20 V (blue) and (b) the reduction states at -1.68 V (red) and -1.88 V (blue) in CH<sub>3</sub>CN ( $1.2 \times 10^{-4}$  M in (a) and  $1.8 \times 10^{-4}$  M in (b)) containing of 0.1 M TBA $^+$ -PF<sub>6</sub> $^-$  as an electrolyte under Ar atmosphere: (i) UV/vis absorption spectral changes and (ii) difference spectra between no bias and applied bias. At +0.11 and +0.20 V, the molar ratios of  $2\text{ni}^-$ -TBA $^+$  and the corresponding oxidized species [ $2\text{ni}^-$ -TBA $^+$ ] $^+$  are supposed to be 50:50 and 3:97, respectively. At -1.68 and -1.88 V, the molar ratios of  $2\text{ni}^-$ -TBA $^+$  and the corresponding reduced species [ $2\text{ni}^-$ -TBA $^+$ ] $^-$  are supposed to be 50:50 and 1:200, respectively. The broad peak at 795 nm in the oxidation states can be assigned as a component of  $2\text{ni}$  radical: the theoretically estimated excitation at 720 nm includes the major transition from SOMO $\alpha$  to SOMO+1 $\alpha$ , both of which are localized at the core  $\pi$ -system (Fig. S54,64).

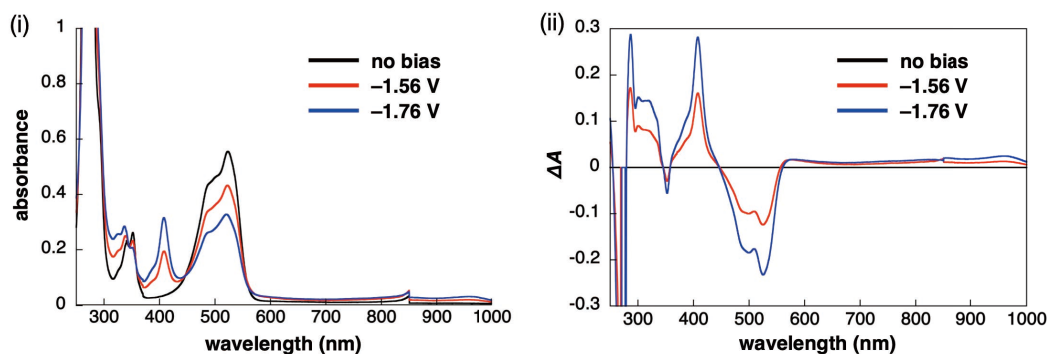

**Fig. S106** Spectroelectrochemical analysis of TATA $^+$ -Cl $^-$  in the reduction states at -1.56 V (red) and -1.76 V (blue) in CH<sub>3</sub>CN ( $3.0 \times 10^{-4}$  M) containing of 0.1 M TBA $^+$ -PF<sub>6</sub> $^-$  as an electrolyte under Ar atmosphere: (i) UV/vis absorption spectral changes and (ii) difference spectra between no bias and applied bias. At -1.56 and -1.76 V, the molar ratios of TATA $^+$ -Cl $^-$  and the corresponding reduced species [TATA $^+$ -Cl $^-$ ] $^-$  are supposed to be 50:50 and 1:200, respectively. The broad peak at 960 nm in the reduction states can be assigned as a component of TATA radical: the theoretically estimated excitations at 902 and 903 nm include the respective major transitions from SOMO $\alpha$  and SOMO $\alpha$  to SOMO+2 $\alpha$  and SOMO+1 $\alpha$ , respectively, all of which are localized at the core  $\pi$ -system (Fig. S55,65).

## References

- [S1] J. R. Frost, S. M. Huber, S. Breitenlechner, C. Bannwarth and T. Bach, *Angew. Chem. Int. Ed.*, 2015, **54**, 691–695.
- [S2] L. J. Esdaile, M. O. Senge and D. P. Arnold, *Chem. Commun.*, 2006, 4192–4194.
- [S3] (a) B. W. Laursen and F. C. Krebs, *Angew. Chem. Int. Ed.*, 2000, **39**, 3432–3434; (b) B. W. Laursen and F. C. Krebs, *Chem. Eur. J.*, 2001, **7**, 1773–1783.
- [S4] Y. Haketa, S. Sasaki, N. Ohta, H. Masunaga, H. Ogawa, N. Mizuno, F. Araoka, H. Takezoe and H. Maeda, *Angew. Chem. Int. Ed.*, 2010, **49**, 10079–10083.
- [S5] (a) C. Stähler, D. Shimizu, K. Yoshida, K. Furukawa, R. Herges and A. Osuka, *Chem. Eur. J.*, 2017, **23**, 7217–7220; (b) Y. Sasano, N. Yasuda and H. Maeda, *Dalton Trans.*, 2017, **46**, 8924–8928.
- [S6] A. Z. Muresan, P. Thammyongkit, J. R. Diers, D. Holten, J. S. Lindsey and D. F. Bocian, *J. Org. Chem.*, 2008, **73**, 6947–6959.
- [S7] (a) N. Yasuda, H. Murayama, Y. Fukuyama, J. E. Kim, S. Kimura, K. Toriumi, Y. Tanaka, Y. Moritomo, Y. Kuroiwa, K. Kato, H. Tanaka and M. Takata, *J. Synchrotron Rad.*, 2009, **16**, 352–357; (b) N. Yasuda, Y. Fukuyama, K. Toriumi, S. Kimura and M. Takata, *AIP Conf. Proc.*, 2010, **1234**, 147–150.
- [S8] G. M. Sheldrick, *Acta Crystallogr. Sect. A*, 2008, **64**, 112–122.
- [S9] (a) *Yadokari-XG, Software for Crystal Structure Analyses*, K. Wakita, 2001; (b) C. Kabuto, S. Akine, T. Nemoto and E. Kwon, *J. Cryst. Soc. Jpn.*, 2009, **51**, 218–224.
- [S10] *CrystalExplorer17*, M. J. Turner, J. J. McKinnon, S. K. Wolff, D. J. Grimwood, P. R. Spackman, D. Jayatilaka and M. A. Spackman, University of Western Australia, 2017.
- [S11] (a) J. J. McKinnon, M. A. Spackman and A. S. Mitchell, *Acta Crystallogr. Sect. B*, 2004, **60**, 627–668; (b) S. L. Tan, M. M. Jotani and E. R. T. Tiekink, *Acta Crystallogr. Sect. E*, 2019, **75**, 308–318.
- [S12] Y. Bando, Y. Haketa, T. Sakurai, W. Matsuda, S. Seki, H. Takaya and H. Maeda, *Chem. Eur. J.*, 2016, **22**, 7843–7850.
- [S13] *Gaussian 09*, revision D.01, M. J. Frisch, G. W. Trucks, H. B. Schlegel, G. E. Scuseria, M. A. Robb, J. R. Cheeseman, G. Scalmani, V. Barone, B. Mennucci, G. A. Petersson, H. Nakatsuji, M. Caricato, X. Li, H. P. Hratchian, A. F. Izmaylov, J. Bloino, G. Zheng, J. L. Sonnenberg, M. Hada, M. Ehara, K. Toyota, R. Fukuda, J. Hasegawa, M. Ishida, T. Nakajima, Y. Honda, O. Kitao, H. Nakai, T. Vreven, J. A. Montgomery, Jr., J. E. Peralta, F. Ogliaro, M. Bearpark, J. J. Heyd, E. Brothers, K. N. Kudin, V. N. Staroverov, T. Keith, R. Kobayashi, J. Normand, K. Raghavachari, A. Rendell, J. C. Burant, S. S. Iyengar, J. Tomasi, M. Cossi, N. Rega, J. M. Millam, M. Klene, J. E. Knox, J. B. Cross, V. Bakken, C. Adamo, J. Jaramillo, R. Gomperts, R. E. Stratmann, O. Yazyev, A. J. Austin, R. Cammi, C. Pomelli, J. W. Ochterski, R. L. Martin, K. Morokuma, V. G. Zakrzewski, G. A. Voth, P. Salvador, J. J. Dannenberg, S. Dapprich, A. D. Daniels, Ö. Farkas, J. B. Foresman, J. V. Ortiz, J. Cioslowski and D. J. Fox, Gaussian, Inc., Wallingford CT, 2013.
- [S14] (a) R. Herges and D. Geuenich, *J. Phys. Chem. A*, 2001, **105**, 3214–3220; (b) D. Geuenich, K. Hess, F. Köhler and R. Herges, *Chem. Rev.*, 2005, **105**, 3758–3772.
- [S15] M. J. S. Phipps, T. Fox, C. S. Tautermann and C.-K. Skylaris, *Chem. Soc. Rev.*, 2015, **44**, 3177–3211.
- [S16] Articles for *GAMESS*: (a) M. W. Schmidt, K. K., Baldrige, J. A. Boatz, S. T. Elbert, M. S. Gordon, J. H. Jensen, S. Koseki, N. Matsunaga, K. A. Nguyen, S. J. Su, T. L. Windus, M. Dupuis and J. A. Montgomery, *J. Comput. Chem.*, 1993, **14**, 1347–1363; (b) M. S. Gordon and M. W. Schmidt, in *Theory and Applications of Computational Chemistry: the first forty years*, ed. C. E. Dykstra, G. Frenking, K. S. Kim and G. E. Scuseria, Elsevier, 2005, pp.1167–1189.
- [S17] Report for FMO: K. Kitaura, E. Ikeo, T. Asada, T. Nakano and M. Uebayasi, *Chem. Phys. Lett.*, 1999, **313**, 701–706.
- [S18] Report for pair interaction energy decomposition analysis (PIEDA): D. G. Fedorov and K. Kitaura, *J. Comput. Chem.*, 2007, **28**, 222–237.
- [S19] M. Kasha, H. R. Rawls and M. Ashraf El-Bayoumi, *Pure Appl. Chem.*, 1965, **11**, 371–392.
- [S20] Y. Ishibashi, Y. Inoue and T. Asahi, *Photochem. Photobiol. Sci.*, 2016, **15**, 1304–1309.
- [S21] Y. Ishibashi, M. Murakami, K. Araki, T. Mutai and T. Asahi, *J. Phys. Chem. C*, 2019, **123**, 11224–11232.
